# Supplementary material for: Identification of microtubule-associated biomarkers in diffuse large B-cell lymphoma and prognosis prediction
Source: Front Genet. 2023 Jan 24;13:1092678. doi: 10.3389/fgene.2022.1092678 (PMC9902697; doi:10.3389/fgene.2022.1092678)
Supplement: Supplementary file 9 [file Table6.XLSX]

## Sheet: Sheet1
ONTOLOGY	ID	Description	GeneRatio	BgRatio	pvalue	p.adjust	qvalue	geneID	Count
BP	GO:0034340	response to type I interferon	22/1464	99/18866	5.51443e-06	0.0180925	0.0178769	OAS1/OAS2/IP6K2/IRF9/TRIM56/TTLL12/IFIT3/CACTIN/STAT2/ISG15/RSAD2/IRF7/METTL3/IFNA4/CDC37/MX2/BST2/OASL/ZBP1/ADAR/XAF1/MAVS	22
BP	GO:0060337	type I interferon signaling pathway	21/1464	95/18866	9.76038e-06	0.0180925	0.0178769	OAS1/OAS2/IP6K2/IRF9/TTLL12/IFIT3/CACTIN/STAT2/ISG15/RSAD2/IRF7/METTL3/IFNA4/CDC37/MX2/BST2/OASL/ZBP1/ADAR/XAF1/MAVS	21
BP	GO:0071357	cellular response to type I interferon	21/1464	95/18866	9.76038e-06	0.0180925	0.0178769	OAS1/OAS2/IP6K2/IRF9/TTLL12/IFIT3/CACTIN/STAT2/ISG15/RSAD2/IRF7/METTL3/IFNA4/CDC37/MX2/BST2/OASL/ZBP1/ADAR/XAF1/MAVS	21
BP	GO:0006111	regulation of gluconeogenesis	14/1464	49/18866	1.37035e-05	0.0190513	0.0188243	KAT2A/DGKQ/MST1/USP7/OGT/CLK2/C1QTNF3/SERPINA12/ADIPOQ/PGP/EP300/NLN/ARPP19/PDK2	14
BP	GO:0008380	RNA splicing	63/1464	487/18866	4.16741e-05	0.0407796	0.0402937	PPWD1/SRSF6/THOC1/RBM39/RBM15B/RBM4/PCBP4/CDK13/SUGP2/SYMPK/SRSF5/TSEN54/DDX17/SPEN/CLK1/PCF11/HNRNPA1/CLASRP/ZCCHC8/RBM6/SRRM2/KHDRBS2/CLK2/PABPN1/DHX16/RBM5/CELF6/NOVA2/RBM25/SRSF8/DHX35/CLK3/HNRNPA3/LUC7L3/CACTIN/DDX42/AKAP17A/SNRNP35/SETX/GPATCH1/U2AF2/AKAP8L/PAPOLA/CWC25/THOC6/SNRNP70/HNRNPC/FASTK/CLK4/PRPF3/METTL3/FUS/SF1/LUC7L/ACIN1/TSEN2/ZRANB2/TSEN34/SRRT/PRPF39/DAZAP1/SRPK1/DHX9	63
BP	GO:0016570	histone modification	61/1464	468/18866	4.39989e-05	0.0407796	0.0402937	USP21/KAT2A/EZH1/BRD1/BRPF3/TAF6L/RTF1/CTBP1/PADI1/ING5/MST1/SIN3B/JARID2/UBR2/USP7/RING1/PPM1F/PRKCB/OGT/SETDB1/MEAF6/CXXC1/KANSL3/NOS1/SUPT7L/JADE1/TTLL12/EHMT2/SETD5/NAA40/DNMT3B/GLYR1/UIMC1/AKAP8L/KANSL1L/PADI4/ZNF274/ZNF335/KMT2D/TRRAP/KAT5/EP300/PRDM14/AKAP8/MSL1/MYSM1/BAZ1B/HDAC5/USP36/KMT2B/SETD6/CDK9/UBR5/MTA1/EP400/HCFC1/KMT2A/BAZ2A/TAF6/CHTOP/SIRT6	61
BP	GO:0016569	covalent chromatin modification	62/1464	481/18866	5.31891e-05	0.0422549	0.0417514	USP21/KAT2A/ATF7IP/EZH1/BRD1/BRPF3/TAF6L/RTF1/CTBP1/PADI1/ING5/MST1/SIN3B/JARID2/UBR2/USP7/RING1/PPM1F/PRKCB/OGT/SETDB1/MEAF6/CXXC1/KANSL3/NOS1/SUPT7L/JADE1/TTLL12/EHMT2/SETD5/NAA40/DNMT3B/GLYR1/UIMC1/AKAP8L/KANSL1L/PADI4/ZNF274/ZNF335/KMT2D/TRRAP/KAT5/EP300/PRDM14/AKAP8/MSL1/MYSM1/BAZ1B/HDAC5/USP36/KMT2B/SETD6/CDK9/UBR5/MTA1/EP400/HCFC1/KMT2A/BAZ2A/TAF6/CHTOP/SIRT6	62
BP	GO:0043484	regulation of RNA splicing	27/1464	156/18866	6.48322e-05	0.043954	0.0434302	SRSF6/RBM39/RBM15B/RBM4/PCBP4/SRSF5/DDX17/CLK1/HNRNPA1/KHDRBS2/CLK2/RBM5/CELF6/NOVA2/RBM25/SRSF8/CLK3/AKAP17A/SETX/U2AF2/SNRNP70/FASTK/CLK4/FUS/SF1/DAZAP1/SRPK1	27
BP	GO:0043967	histone H4 acetylation	16/1464	70/18866	7.11357e-05	0.043954	0.0434302	KAT2A/CTBP1/ING5/OGT/MEAF6/KANSL3/JADE1/NAA40/KANSL1L/TRRAP/KAT5/EP300/MSL1/EP400/HCFC1/KMT2A	16
BP	GO:0050684	regulation of mRNA processing	26/1464	152/18866	0.000107347	0.0596957	0.0589844	SRSF6/RBM39/RBM15B/RBM4/PCBP4/SRSF5/DDX17/HNRNPA1/KHDRBS2/PABPN1/RBM5/CELF6/NOVA2/SLTM/RBM25/SRSF8/HSF1/U2AF2/PAPOLA/SNRNP70/SAFB2/SF1/CDK9/DAZAP1/SRPK1/DHX9	26
BP	GO:0032481	positive regulation of type I interferon production	16/1464	74/18866	0.000143616	0.0726045	0.0717393	RNF135/ZCCHC3/IFI16/DHX33/FLOT1/IRF7/TICAM1/EP300/LRRFIP1/PTPN22/ZBP1/MAVS/STAT6/CRCP/POLR3D/DHX9	16
BP	GO:0032479	regulation of type I interferon production	22/1464	125/18866	0.000232485	0.105889	0.104627	RNF135/ZCCHC3/IFI16/DHX33/TRIM56/NLRC3/TRIM25/CACTIN/FLOT1/TIRAP/ISG15/IRF7/TICAM1/EP300/LRRFIP1/PTPN22/ZBP1/MAVS/STAT6/CRCP/POLR3D/DHX9	22
BP	GO:0045721	negative regulation of gluconeogenesis	7/1464	18/18866	0.000247537	0.105889	0.104627	MST1/CLK2/C1QTNF3/SERPINA12/ADIPOQ/PGP/EP300	7
BP	GO:0032606	type I interferon production	22/1464	127/18866	0.000293422	0.113957	0.112599	RNF135/ZCCHC3/IFI16/DHX33/TRIM56/NLRC3/TRIM25/CACTIN/FLOT1/TIRAP/ISG15/IRF7/TICAM1/EP300/LRRFIP1/PTPN22/ZBP1/MAVS/STAT6/CRCP/POLR3D/DHX9	22
BP	GO:0097194	execution phase of apoptosis	18/1464	95/18866	0.000330669	0.113957	0.112599	FZD3/DFFB/XKR8/CDK5RAP3/CIDEC/XKR6/HSF1/CAPN10/DFFA/CASP10/CIDEB/ACIN1/RPS3/PAM16/SHARPIN/STK24/CIDEA/MADD	18
BP	GO:0018394	peptidyl-lysine acetylation	27/1464	172/18866	0.000343336	0.113957	0.112599	KAT2A/BRD1/BRPF3/TAF6L/CTBP1/ING5/OGT/MEAF6/KANSL3/NOS1/SUPT7L/JADE1/BAG6/SETD5/NAA40/GLYR1/KLF15/ATAT1/KANSL1L/TRRAP/KAT5/EP300/MSL1/EP400/HCFC1/KMT2A/TAF6	27
BP	GO:0018393	internal peptidyl-lysine acetylation	26/1464	164/18866	0.000374508	0.113957	0.112599	KAT2A/BRD1/BRPF3/TAF6L/CTBP1/ING5/OGT/MEAF6/KANSL3/NOS1/SUPT7L/JADE1/BAG6/SETD5/NAA40/GLYR1/ATAT1/KANSL1L/TRRAP/KAT5/EP300/MSL1/EP400/HCFC1/KMT2A/TAF6	26
BP	GO:0044154	histone H3-K14 acetylation	6/1464	14/18866	0.000376427	0.113957	0.112599	KAT2A/BRD1/BRPF3/ING5/MEAF6/KMT2A	6
BP	GO:0006913	nucleocytoplasmic transport	46/1464	354/18866	0.000391047	0.113957	0.112599	SRSF6/TSC1/TNPO2/THOC1/RBM15B/RBM4/POM121L12/TXNIP/SYMPK/SHH/SRSF5/CCHCR1/RRS1/POM121L2/NXF1/POLDIP3/HNRNPA1/SMAD3/LZTS2/PRICKLE1/PABPN1/UPF2/FAM53A/TMCO6/POM121/APOD/UPF3A/U2AF2/XPO5/AKAP8L/THOC6/PML/NOLC1/KPNA5/ANKRD54/PRKACA/MX2/ANGPT1/UBR5/MAVS/XPO6/SIX3/PPP1R10/CHTOP/BACH2/DHX9	46
BP	GO:0009081	branched-chain amino acid metabolic process	8/1464	25/18866	0.000421114	0.113957	0.112599	IVD/PPM1K/ACAT1/ILVBL/DBT/BCAT2/MCCC2/MCCC1	8
BP	GO:0010675	regulation of cellular carbohydrate metabolic process	24/1464	148/18866	0.000441129	0.113957	0.112599	PPP1R3E/PDK4/KAT2A/PTH1R/DGKQ/MST1/FOXK1/USP7/OGT/CLK2/NCOR1/C1QTNF3/P2RY1/SERPINA12/ADIPOQ/ACACB/SLC4A1/SORBS1/PGP/EP300/NLN/ARPP19/PDK2/SIRT6	24
BP	GO:0006475	internal protein amino acid acetylation	26/1464	166/18866	0.000453667	0.113957	0.112599	KAT2A/BRD1/BRPF3/TAF6L/CTBP1/ING5/OGT/MEAF6/KANSL3/NOS1/SUPT7L/JADE1/BAG6/SETD5/NAA40/GLYR1/ATAT1/KANSL1L/TRRAP/KAT5/EP300/MSL1/EP400/HCFC1/KMT2A/TAF6	26
BP	GO:0051169	nuclear transport	46/1464	357/18866	0.000471319	0.113957	0.112599	SRSF6/TSC1/TNPO2/THOC1/RBM15B/RBM4/POM121L12/TXNIP/SYMPK/SHH/SRSF5/CCHCR1/RRS1/POM121L2/NXF1/POLDIP3/HNRNPA1/SMAD3/LZTS2/PRICKLE1/PABPN1/UPF2/FAM53A/TMCO6/POM121/APOD/UPF3A/U2AF2/XPO5/AKAP8L/THOC6/PML/NOLC1/KPNA5/ANKRD54/PRKACA/MX2/ANGPT1/UBR5/MAVS/XPO6/SIX3/PPP1R10/CHTOP/BACH2/DHX9	46
BP	GO:0006006	glucose metabolic process	31/1464	214/18866	0.000551922	0.120757	0.119318	PPP1R3E/OAS1/PDK4/CPT1A/KAT2A/NISCH/RBP4/DGKQ/MST1/ADPGK/FOXK1/USP7/OGT/PKLR/CLK2/LRP5/C1QTNF3/BRAT1/SERPINA12/ADIPOQ/ACACB/SORBS1/APOD/PGP/ATF4/EP300/BRS3/NLN/ARPP19/ENO3/PDK2	31
BP	GO:0043255	regulation of carbohydrate biosynthetic process	18/1464	99/18866	0.000556626	0.120757	0.119318	PPP1R3E/KAT2A/PTH1R/DGKQ/MST1/USP7/OGT/CLK2/C1QTNF3/P2RY1/SERPINA12/ADIPOQ/SORBS1/PGP/EP300/NLN/ARPP19/PDK2	18
BP	GO:0006094	gluconeogenesis	17/1464	91/18866	0.000567848	0.120757	0.119318	KAT2A/RBP4/DGKQ/MST1/USP7/OGT/CLK2/C1QTNF3/SERPINA12/ADIPOQ/PGP/ATF4/EP300/NLN/ARPP19/ENO3/PDK2	17
BP	GO:1900225	regulation of NLRP3 inflammasome complex assembly	6/1464	15/18866	0.000586306	0.120757	0.119318	DHX33/NLRC3/ATAT1/MEFV/CPTP/EIF2AK2	6
BP	GO:0045071	negative regulation of viral genome replication	13/1464	61/18866	0.000681988	0.135448	0.133834	OAS1/OAS2/IFI16/SETDB1/ISG15/PARP10/RSAD2/BST2/OASL/CCL8/MAVS/EIF2AK2/SRPK1	13
BP	GO:0019319	hexose biosynthetic process	17/1464	94/18866	0.000834337	0.143404	0.141696	KAT2A/RBP4/DGKQ/MST1/USP7/OGT/CLK2/C1QTNF3/SERPINA12/ADIPOQ/PGP/ATF4/EP300/NLN/ARPP19/ENO3/PDK2	17
BP	GO:0043543	protein acylation	34/1464	248/18866	0.000840011	0.143404	0.141696	KAT2A/BRD1/BRPF3/TAF6L/CTBP1/ING5/ZDHHC6/OGT/MEAF6/KANSL3/NOS1/SUPT7L/ZDHHC17/JADE1/BAG6/SETD5/NAA40/ZDHHC8/GLYR1/NAT9/KLF15/ATAT1/KANSL1L/TRRAP/KAT5/OGDH/EP300/ZDHHC7/MSL1/EP400/PORCN/HCFC1/KMT2A/TAF6	34
BP	GO:1903901	negative regulation of viral life cycle	16/1464	86/18866	0.000854044	0.143404	0.141696	OAS1/OAS2/IFI16/TRIM27/SETDB1/TRIM25/ISG15/PARP10/RSAD2/PML/BST2/OASL/CCL8/MAVS/EIF2AK2/SRPK1	16
BP	GO:0006853	carnitine shuttle	5/1464	11/18866	0.00086787	0.143404	0.141696	CPT1A/SLC25A20/PRKAB2/THRSP/ACACB	5
BP	GO:0043981	histone H4-K5 acetylation	6/1464	16/18866	0.000876776	0.143404	0.141696	OGT/MEAF6/KANSL3/JADE1/KANSL1L/HCFC1	6
BP	GO:0043982	histone H4-K8 acetylation	6/1464	16/18866	0.000876776	0.143404	0.141696	OGT/MEAF6/KANSL3/JADE1/KANSL1L/HCFC1	6
BP	GO:0009083	branched-chain amino acid catabolic process	7/1464	22/18866	0.00100694	0.159989	0.158082	IVD/PPM1K/ACAT1/DBT/BCAT2/MCCC2/MCCC1	7
BP	GO:0048024	regulation of mRNA splicing, via spliceosome	19/1464	113/18866	0.00107128	0.165483	0.163511	SRSF6/RBM39/RBM15B/RBM4/PCBP4/SRSF5/DDX17/HNRNPA1/KHDRBS2/RBM5/CELF6/NOVA2/RBM25/SRSF8/U2AF2/SNRNP70/SF1/DAZAP1/SRPK1	19
BP	GO:0016573	histone acetylation	24/1464	159/18866	0.00125149	0.181863	0.179696	KAT2A/BRD1/BRPF3/TAF6L/CTBP1/ING5/OGT/MEAF6/KANSL3/NOS1/SUPT7L/JADE1/SETD5/NAA40/GLYR1/KANSL1L/TRRAP/KAT5/EP300/MSL1/EP400/HCFC1/KMT2A/TAF6	24
BP	GO:0044546	NLRP3 inflammasome complex assembly	6/1464	17/18866	0.0012666	0.181863	0.179696	DHX33/NLRC3/ATAT1/MEFV/CPTP/EIF2AK2	6
BP	GO:0019318	hexose metabolic process	34/1464	254/18866	0.00127671	0.181863	0.179696	PPP1R3E/OAS1/PDK4/GALK2/GALT/CPT1A/KAT2A/NISCH/RBP4/DGKQ/MST1/ADPGK/FOXK1/USP7/MAN2A2/OGT/PKLR/CLK2/LRP5/C1QTNF3/BRAT1/SERPINA12/ADIPOQ/ACACB/SORBS1/APOD/PGP/ATF4/EP300/BRS3/NLN/ARPP19/ENO3/PDK2	34
BP	GO:1903311	regulation of mRNA metabolic process	43/1464	344/18866	0.00130813	0.181863	0.179696	SRSF6/RBM39/RBM15B/RBM4/PCBP4/SRSF5/DDX17/YTHDF1/HNRNPA1/GIGYF2/KHDRBS2/PABPN1/RBM5/CELF6/FASTKD1/NOVA2/SLTM/RBM25/EXOSC6/SRSF8/HSF1/DND1/TNRC6A/GDNF/U2AF2/PAPOLA/TIRAP/SNRNP70/SAFB2/HNRNPC/FASTK/ZFP36L2/METTL3/FUS/PLEKHN1/SF1/EXOSC7/CDK9/ROCK2/DAZAP1/SRPK1/BOLL/DHX9	43
BP	GO:0016578	histone deubiquitination	7/1464	23/18866	0.00135141	0.183297	0.181113	USP21/KAT2A/USP7/UIMC1/TRRAP/MYSM1/USP36	7
BP	GO:0045161	neuronal ion channel clustering	5/1464	12/18866	0.00139302	0.184442	0.182244	GLDN/PICK1/KCNIP2/MTCH1/MYOC	5
BP	GO:0051607	defense response to virus	34/1464	258/18866	0.00166768	0.204177	0.201744	OAS1/RNF135/OAS2/ZCCHC3/IFI16/UNC93B1/TRIM22/DDX17/IRF9/TRIM56/TRIM52/SEC14L1/IFIT3/STAT2/RNASE2/IFNL1/ISG15/RSAD2/PML/IRF7/TICAM1/IFNA4/MX2/PTPN22/BST2/OASL/ZBP1/ADAR/MAVS/CRCP/EIF2AK2/POLR3D/IFI44L/DHX9	34
BP	GO:0006921	cellular component disassembly involved in execution phase of apoptosis	9/1464	37/18866	0.00169092	0.204177	0.201744	DFFB/CDK5RAP3/HSF1/CAPN10/DFFA/ACIN1/PAM16/SHARPIN/CIDEA	9
BP	GO:0046364	monosaccharide biosynthetic process	17/1464	100/18866	0.00169552	0.204177	0.201744	KAT2A/RBP4/DGKQ/MST1/USP7/OGT/CLK2/C1QTNF3/SERPINA12/ADIPOQ/PGP/ATF4/EP300/NLN/ARPP19/ENO3/PDK2	17
BP	GO:0000377	RNA splicing, via transesterification reactions with bulged adenosine as nucleophile	47/1464	390/18866	0.00172565	0.204177	0.201744	PPWD1/SRSF6/RBM39/RBM15B/RBM4/PCBP4/CDK13/SYMPK/SRSF5/DDX17/SPEN/PCF11/HNRNPA1/ZCCHC8/RBM6/SRRM2/KHDRBS2/PABPN1/DHX16/RBM5/CELF6/NOVA2/RBM25/SRSF8/DHX35/HNRNPA3/LUC7L3/CACTIN/DDX42/SNRNP35/SETX/GPATCH1/U2AF2/PAPOLA/CWC25/SNRNP70/HNRNPC/PRPF3/METTL3/FUS/SF1/LUC7L/SRRT/PRPF39/DAZAP1/SRPK1/DHX9	47
BP	GO:0000398	mRNA splicing, via spliceosome	47/1464	390/18866	0.00172565	0.204177	0.201744	PPWD1/SRSF6/RBM39/RBM15B/RBM4/PCBP4/CDK13/SYMPK/SRSF5/DDX17/SPEN/PCF11/HNRNPA1/ZCCHC8/RBM6/SRRM2/KHDRBS2/PABPN1/DHX16/RBM5/CELF6/NOVA2/RBM25/SRSF8/DHX35/HNRNPA3/LUC7L3/CACTIN/DDX42/SNRNP35/SETX/GPATCH1/U2AF2/PAPOLA/CWC25/SNRNP70/HNRNPC/PRPF3/METTL3/FUS/SF1/LUC7L/SRRT/PRPF39/DAZAP1/SRPK1/DHX9	47
BP	GO:0019079	viral genome replication	20/1464	127/18866	0.00183455	0.212541	0.210008	CD209/OAS1/OAS2/ATG16L2/IFI16/CTBP1/SETDB1/CLEC4M/ISG15/PARP10/RSAD2/BST2/OASL/CCL8/ATG16L1/ADAR/MAVS/ROCK2/EIF2AK2/SRPK1	20
BP	GO:0010677	negative regulation of cellular carbohydrate metabolic process	10/1464	45/18866	0.00198708	0.224162	0.221491	MST1/CLK2/NCOR1/C1QTNF3/SERPINA12/ADIPOQ/SLC4A1/PGP/EP300/SIRT6	10
BP	GO:0000375	RNA splicing, via transesterification reactions	47/1464	393/18866	0.00201549	0.224162	0.221491	PPWD1/SRSF6/RBM39/RBM15B/RBM4/PCBP4/CDK13/SYMPK/SRSF5/DDX17/SPEN/PCF11/HNRNPA1/ZCCHC8/RBM6/SRRM2/KHDRBS2/PABPN1/DHX16/RBM5/CELF6/NOVA2/RBM25/SRSF8/DHX35/HNRNPA3/LUC7L3/CACTIN/DDX42/SNRNP35/SETX/GPATCH1/U2AF2/PAPOLA/CWC25/SNRNP70/HNRNPC/PRPF3/METTL3/FUS/SF1/LUC7L/SRRT/PRPF39/DAZAP1/SRPK1/DHX9	47
BP	GO:0006473	protein acetylation	28/1464	203/18866	0.00210645	0.229686	0.226949	KAT2A/BRD1/BRPF3/TAF6L/CTBP1/ING5/OGT/MEAF6/KANSL3/NOS1/SUPT7L/JADE1/BAG6/SETD5/NAA40/GLYR1/NAT9/KLF15/ATAT1/KANSL1L/TRRAP/KAT5/EP300/MSL1/EP400/HCFC1/KMT2A/TAF6	28
BP	GO:0009895	negative regulation of catabolic process	40/1464	323/18866	0.00224214	0.23978	0.236922	TBC1D14/TSC1/TIMP4/WDR6/SHH/CDK5RAP3/FOXK1/USP7/OGT/SMAD3/HGF/NCOR1/BAG6/ATP13A2/ACACB/DND1/SLC4A1/DFFA/GDNF/DAB2IP/USP19/POLDIP2/TIRAP/SNRNP70/PLIN5/HNRNPC/CPTP/PML/MDM4/ZDHHC7/SEC22B/FUS/USP36/PTPN22/LRIG2/PAM16/CIDEA/BOLL/SIRT6/DHX9	40
BP	GO:0046339	diacylglycerol metabolic process	7/1464	25/18866	0.00231042	0.242419	0.239531	DGKA/DGKQ/AVIL/PNPLA2/DGKD/DGKE/PLA2G15	7
BP	GO:0010906	regulation of glucose metabolic process	19/1464	121/18866	0.00243557	0.250818	0.24783	PPP1R3E/PDK4/KAT2A/DGKQ/MST1/FOXK1/USP7/OGT/CLK2/C1QTNF3/SERPINA12/ADIPOQ/ACACB/SORBS1/PGP/EP300/NLN/ARPP19/PDK2	19
BP	GO:0046326	positive regulation of glucose import	9/1464	39/18866	0.00250312	0.253088	0.250072	TERT/C2CD5/GPC3/ADIPOQ/CAPN10/SORBS1/OCLN/KLF15/ARPP19	9
BP	GO:0000380	alternative mRNA splicing, via spliceosome	15/1464	87/18866	0.00268473	0.266603	0.263426	SRSF6/RBM15B/RBM4/CDK13/SRSF5/DDX17/HNRNPA1/KHDRBS2/RBM5/CELF6/NOVA2/RBM25/SRSF8/SF1/DHX9	15
BP	GO:0007249	I-kappaB kinase/NF-kappaB signaling	36/1464	286/18866	0.00275168	0.268458	0.265259	TRIM27/CCR7/TRIM22/CPNE1/PRKCB/NLRC3/TRIM25/TRIM52/ZDHHC17/CARD11/ADIPOQ/DEFB124/IKBKB/TBKBP1/CACTIN/ABL1/TRAF5/MIB2/DAB2IP/EDA2R/TAB1/TIRAP/CASP10/TNFRSF19/CC2D1A/SHISA5/NOD1/TICAM1/SECTM1/BST2/ANGPT1/MAVS/ROCK2/SHARPIN/PIDD1/CAPN3	36
BP	GO:0071243	cellular response to arsenic-containing substance	6/1464	20/18866	0.00324212	0.310852	0.307148	MAPK13/HNRNPA1/HSF1/ATF4/DAXX/CPEB2	6
BP	GO:0006405	RNA export from nucleus	21/1464	144/18866	0.00371593	0.34459	0.340484	SRSF6/TSC1/THOC1/RBM15B/POM121L12/SYMPK/SRSF5/RRS1/POM121L2/NXF1/POLDIP3/HNRNPA1/PABPN1/UPF2/POM121/U2AF2/XPO5/AKAP8L/THOC6/CHTOP/DHX9	21
BP	GO:0015931	nucleobase-containing compound transport	33/1464	261/18866	0.00375604	0.34459	0.340484	SRSF6/SLC29A2/TSC1/THOC1/RBM15B/SLC25A23/SLC25A36/POM121L12/SYMPK/SRSF5/RRS1/SLC25A45/POM121L2/NPIPA1/NXF1/POLDIP3/HNRNPA1/PABPN1/UPF2/SLC25A42/HSF1/POM121/FLOT1/UPF3A/U2AF2/XPO5/AKAP8L/THOC6/SLC25A6/ABCC11/MX2/CHTOP/DHX9	33
BP	GO:0046685	response to arsenic-containing substance	8/1464	34/18866	0.00377989	0.34459	0.340484	RBM4/MAPK13/HNRNPA1/HSF1/ATF4/DAXX/SRRT/CPEB2	8
BP	GO:0043122	regulation of I-kappaB kinase/NF-kappaB signaling	32/1464	252/18866	0.00400288	0.354707	0.35048	TRIM27/CCR7/TRIM22/CPNE1/PRKCB/NLRC3/TRIM25/TRIM52/ZDHHC17/CARD11/ADIPOQ/IKBKB/CACTIN/ABL1/TRAF5/MIB2/DAB2IP/EDA2R/TIRAP/CASP10/TNFRSF19/CC2D1A/SHISA5/NOD1/TICAM1/SECTM1/BST2/ANGPT1/MAVS/SHARPIN/PIDD1/CAPN3	32
BP	GO:0035455	response to interferon-alpha	6/1464	21/18866	0.0042448	0.354707	0.35048	IFIT3/AXL/MX2/BST2/ADAR/EIF2AK2	6
BP	GO:0043984	histone H4-K16 acetylation	6/1464	21/18866	0.0042448	0.354707	0.35048	OGT/KANSL3/KANSL1L/MSL1/HCFC1/KMT2A	6
BP	GO:0080182	histone H3-K4 trimethylation	6/1464	21/18866	0.0042448	0.354707	0.35048	RTF1/OGT/ZNF335/KMT2D/KMT2B/KMT2A	6
BP	GO:0034121	regulation of toll-like receptor signaling pathway	13/1464	74/18866	0.00425066	0.354707	0.35048	LILRA2/LRRC14/GRAMD4/CACTIN/FLOT1/DAB2IP/ARRB2/TIRAP/RSAD2/IRF7/TICAM1/PTPN22/CD300A	13
BP	GO:0070301	cellular response to hydrogen peroxide	16/1464	100/18866	0.00427357	0.354707	0.35048	ANKZF1/KLF2/MAPK13/HGF/HSF1/ZNF580/ABL1/TRAP1/SETX/STK25/AXL/RPS3/FXN/PDE8A/STAT6/RNF112	16
BP	GO:0032608	interferon-beta production	10/1464	50/18866	0.00449366	0.35814	0.353873	RNF135/TRIM56/NLRC3/CACTIN/FLOT1/TIRAP/IRF7/MAVS/POLR3D/DHX9	10
BP	GO:0030262	apoptotic nuclear changes	8/1464	35/18866	0.00457255	0.35814	0.353873	DFFB/CDK5RAP3/HSF1/DFFA/ACIN1/PAM16/SHARPIN/CIDEA	8
BP	GO:0050779	RNA destabilization	8/1464	35/18866	0.00457255	0.35814	0.353873	YTHDF1/DXO/GIGYF2/DND1/ZFP36L2/METTL3/PLEKHN1/ROCK2	8
BP	GO:0060338	regulation of type I interferon-mediated signaling pathway	8/1464	35/18866	0.00457255	0.35814	0.353873	TTLL12/CACTIN/IRF7/METTL3/CDC37/ZBP1/ADAR/MAVS	8
BP	GO:1990542	mitochondrial transmembrane transport	16/1464	101/18866	0.00472141	0.361842	0.357531	CPT1A/SLC25A20/SLC25A23/SLC25A36/PRKAB2/SFXN4/THRSP/CHCHD4/ACACB/TOMM40/SLC25A37/GRPEL1/SFXN5/PAM16/ATP6/TIMM23B	16
BP	GO:0031330	negative regulation of cellular catabolic process	33/1464	265/18866	0.00474995	0.361842	0.357531	TBC1D14/TSC1/TIMP4/WDR6/SHH/CDK5RAP3/FOXK1/USP7/OGT/HGF/BAG6/ATP13A2/ACACB/DND1/DFFA/GDNF/DAB2IP/USP19/POLDIP2/TIRAP/SNRNP70/PLIN5/HNRNPC/CPTP/PML/SEC22B/FUS/USP36/PTPN22/LRIG2/PAM16/BOLL/DHX9	33
BP	GO:0009615	response to virus	41/1464	349/18866	0.00512035	0.378031	0.373526	OAS1/RNF135/OAS2/URI1/CXCR4/ZCCHC3/IFI16/UNC93B1/TRIM22/DDX17/IRF9/TRIM56/CREBZF/TRIM52/SEC14L1/IFIT3/IKBKB/STAT2/RNASE2/IFNL1/ISG15/RSAD2/PML/IRF7/TICAM1/IFNA4/DUOX2/MX2/PTPN22/BST2/OASL/ZBP1/CCL8/ADAR/MAVS/CXCL12/CRCP/EIF2AK2/POLR3D/IFI44L/DHX9	41
BP	GO:0043414	macromolecule methylation	38/1464	318/18866	0.00519509	0.378031	0.373526	NSUN5P1/ATF7IP/EZH1/RBM15B/RTF1/NSUN6/JARID2/PCMTD2/NSUN5/OGT/RNMT/SETDB1/CXXC1/TRMT10B/TTLL12/THUMPD2/EHMT2/SETD5/MBD1/DNMT3B/RAB3D/PICK1/GTPBP3/GATAD2A/NOP2/ZNF274/TRMT1/ZNF335/KMT2D/PRDM14/METTL3/KMT2B/SETD6/MYC/CMTR1/KMT2A/BAZ2A/CHTOP	38
BP	GO:0045912	negative regulation of carbohydrate metabolic process	10/1464	51/18866	0.00520932	0.378031	0.373526	MST1/CLK2/NCOR1/C1QTNF3/SERPINA12/ADIPOQ/SLC4A1/PGP/EP300/SIRT6	10
BP	GO:0050821	protein stabilization	25/1464	187/18866	0.00532406	0.378031	0.373526	TSC1/HIP1/DVL1/ATF7IP/HPS4/TELO2/USP7/WNT10B/SMAD3/BAG6/OTUD3/COG3/FLOT1/SEC16A/USP19/HYPK/MDM4/EP300/STK4/CDC37/USP36/GPIHBP1/HCFC1/TBRG1/ATP1B2	25
BP	GO:0032259	methylation	43/1464	371/18866	0.00536654	0.378031	0.373526	METTL7B/NSUN5P1/ATF7IP/EZH1/RBM15B/RTF1/NSUN6/JARID2/PCMTD2/NSUN5/OGT/RNMT/SETDB1/METTL7A/CXXC1/TRMT10B/MAT2A/TTLL12/THUMPD2/EHMT2/SETD5/MBD1/DNMT3B/AS3MT/RAB3D/PICK1/GTPBP3/DPH5/GATAD2A/NOP2/ZNF274/TRMT1/ZNF335/KMT2D/PRDM14/METTL3/KMT2B/SETD6/MYC/CMTR1/KMT2A/BAZ2A/CHTOP	43
BP	GO:0000381	regulation of alternative mRNA splicing, via spliceosome	13/1464	76/18866	0.00537253	0.378031	0.373526	SRSF6/RBM15B/RBM4/SRSF5/DDX17/HNRNPA1/KHDRBS2/RBM5/CELF6/NOVA2/RBM25/SRSF8/SF1	13
BP	GO:0032069	regulation of nuclease activity	6/1464	22/18866	0.00545899	0.378031	0.373526	OAS1/OAS2/DFFA/DDX11/RPS3/OASL	6
BP	GO:1990778	protein localization to cell periphery	40/1464	340/18866	0.00550629	0.378031	0.373526	RAB40C/LAMA5/GOLGA4/C2CD5/WDR19/KCNB1/EPB41/GORASP1/PACS2/SCRIB/P2RY1/BBIP1/ZFYVE27/RAB12/ADIPOQ/SAPCD2/NUMA1/IKBKB/KCNIP3/MRAP/BBS2/SLC4A1/ZDHHC8/FLOT1/SORBS1/SEC16A/DPP6/RAB3D/NUMB/GGA1/ZDHHC7/RAB8A/WDR72/RAB3C/ROCK2/CACNB2/SPTBN1/SHISA6/PPIL2/ARHGEF16	40
BP	GO:0043123	positive regulation of I-kappaB kinase/NF-kappaB signaling	25/1464	188/18866	0.00570091	0.386619	0.382012	TRIM27/CCR7/TRIM22/PRKCB/TRIM25/TRIM52/ZDHHC17/CARD11/ADIPOQ/IKBKB/ABL1/TRAF5/MIB2/EDA2R/TIRAP/CASP10/TNFRSF19/CC2D1A/SHISA5/NOD1/TICAM1/SECTM1/BST2/MAVS/SHARPIN	25
BP	GO:0040029	regulation of gene expression, epigenetic	27/1464	209/18866	0.0061824	0.407795	0.402935	KAT2A/EZH1/RBM15B/IFI16/CTBP1/KLF2/TRIM27/JARID2/UBR2/PABPC1L/ARID1B/TAF1D/CREBZF/DNMT3B/ZNF335/POLR1A/KMT2D/EP300/PRDM14/METTL3/BAZ1B/SMARCD1/HDAC5/ZMIZ2/MTA1/MYBBP1A/SIRT6	27
BP	GO:0048525	negative regulation of viral process	16/1464	104/18866	0.00629911	0.407795	0.402935	OAS1/OAS2/IFI16/TRIM27/SETDB1/TRIM25/ISG15/PARP10/RSAD2/PML/BST2/OASL/CCL8/MAVS/EIF2AK2/SRPK1	16
BP	GO:0072659	protein localization to plasma membrane	34/1464	281/18866	0.00654577	0.407795	0.402935	RAB40C/LAMA5/GOLGA4/C2CD5/KCNB1/GORASP1/PACS2/SCRIB/P2RY1/ZFYVE27/RAB12/ADIPOQ/IKBKB/KCNIP3/MRAP/BBS2/SLC4A1/ZDHHC8/FLOT1/SORBS1/SEC16A/DPP6/RAB3D/NUMB/GGA1/ZDHHC7/RAB8A/WDR72/RAB3C/ROCK2/CACNB2/SPTBN1/PPIL2/ARHGEF16	34
BP	GO:0050657	nucleic acid transport	26/1464	200/18866	0.00656664	0.407795	0.402935	SRSF6/TSC1/THOC1/RBM15B/POM121L12/SYMPK/SRSF5/RRS1/POM121L2/NPIPA1/NXF1/POLDIP3/HNRNPA1/PABPN1/UPF2/HSF1/POM121/FLOT1/UPF3A/U2AF2/XPO5/AKAP8L/THOC6/MX2/CHTOP/DHX9	26
BP	GO:0050658	RNA transport	26/1464	200/18866	0.00656664	0.407795	0.402935	SRSF6/TSC1/THOC1/RBM15B/POM121L12/SYMPK/SRSF5/RRS1/POM121L2/NPIPA1/NXF1/POLDIP3/HNRNPA1/PABPN1/UPF2/HSF1/POM121/FLOT1/UPF3A/U2AF2/XPO5/AKAP8L/THOC6/MX2/CHTOP/DHX9	26
BP	GO:0033013	tetrapyrrole metabolic process	11/1464	61/18866	0.00672015	0.407795	0.402935	PPOX/MMACHC/AMBP/EIF2AK1/ABCC1/RSAD1/FXN/ALAS2/ABCD4/CD320/CTRB2	11
BP	GO:0061512	protein localization to cilium	11/1464	61/18866	0.00672015	0.407795	0.402935	INPP5E/RAB11FIP3/WDR19/TTC21A/BBIP1/CCDC66/NPHP4/IFT140/GGA1/TULP3/TULP2	11
BP	GO:0010828	positive regulation of glucose transmembrane transport	9/1464	45/18866	0.00688189	0.407795	0.402935	TERT/C2CD5/GPC3/ADIPOQ/CAPN10/SORBS1/OCLN/KLF15/ARPP19	9
BP	GO:0072583	clathrin-dependent endocytosis	9/1464	45/18866	0.00688189	0.407795	0.402935	SIGLEC1/ITSN1/HIP1/AP2A2/SLC9B2/ITGA4/TNK2/DGKD/DLL1	9
BP	GO:1902001	fatty acid transmembrane transport	6/1464	23/18866	0.00690873	0.407795	0.402935	CPT1A/SLC25A20/PRKAB2/THRSP/ACACB/ABCD4	6
BP	GO:2000810	regulation of bicellular tight junction assembly	6/1464	23/18866	0.00690873	0.407795	0.402935	GPBAR1/IKBKB/OCLN/NPHP4/PRKACA/ROCK2	6
BP	GO:1904837	beta-catenin-TCF complex assembly	7/1464	30/18866	0.0069583	0.407795	0.402935	TERT/TLE2/KMT2D/TRRAP/KAT5/EP300/MYC	7
BP	GO:0010821	regulation of mitochondrion organization	25/1464	191/18866	0.00696646	0.407795	0.402935	MYO19/HPS4/VPS13C/TP73/ZDHHC6/RHOT2/ADCK1/HGF/ATP13A2/MIEF1/PPP3CC/PDE2A/STAT2/UBL4B/MPV17L/ARRB2/PLA2G6/ABLIM3/CIDEB/EP300/CDC37/USP36/FXN/PAM16/DHODH	25
BP	GO:2001252	positive regulation of chromosome organization	24/1464	182/18866	0.00738053	0.426334	0.421254	KAT2A/ATF7IP/RTF1/CTBP1/CDC16/JARID2/OGT/HNRNPA1/SETDB1/HMBOX1/MAP3K4/NOS1/NUMA1/DNMT3B/DDX11/GLYR1/AKAP8L/PML/AKAP8/CDK9/PPP1R10/KMT2A/CHTOP/SIRT6	24
BP	GO:0044272	sulfur compound biosynthetic process	25/1464	192/18866	0.00743651	0.426334	0.421254	PDK4/CSAD/B4GALT3/NDST3/GSTM2/ACSS1/ST3GAL3/ACAT1/MAT2A/PDPR/B3GALT6/B4GALT2/GSTM4/GSTM1/ACACB/CHST12/OPLAH/MPST/BCAN/FASN/ACSBG2/ANGPT1/PDK2/NCAN/TECR	25
BP	GO:1905269	positive regulation of chromatin organization	16/1464	106/18866	0.00756928	0.426725	0.42164	KAT2A/ATF7IP/RTF1/CTBP1/JARID2/OGT/SETDB1/NOS1/DNMT3B/GLYR1/AKAP8L/AKAP8/CDK9/KMT2A/CHTOP/SIRT6	16
BP	GO:0070213	protein auto-ADP-ribosylation	4/1464	11/18866	0.00764983	0.426725	0.42164	PARP6/PARP3/PARP8/PARP10	4
BP	GO:0043117	positive regulation of vascular permeability	5/1464	17/18866	0.00784928	0.426725	0.42164	PDE2A/TJP3/OCLN/ANGPT1/CXCR2	5
BP	GO:0071360	cellular response to exogenous dsRNA	5/1464	17/18866	0.00784928	0.426725	0.42164	ZCCHC3/FLOT1/RALB/MAVS/DHX9	5
BP	GO:0010212	response to ionizing radiation	20/1464	144/18866	0.00786336	0.426725	0.42164	IFI16/INTS3/INO80/RAD9A/CLK2/BRAT1/POLG/HSF1/DNMT3B/DCLRE1C/SPIDR/UIMC1/PML/TICRR/KAT5/ERCC8/STK11/AEN/MTA1/MYC	20
BP	GO:0051236	establishment of RNA localization	26/1464	203/18866	0.00794382	0.426725	0.42164	SRSF6/TSC1/THOC1/RBM15B/POM121L12/SYMPK/SRSF5/RRS1/POM121L2/NPIPA1/NXF1/POLDIP3/HNRNPA1/PABPN1/UPF2/HSF1/POM121/FLOT1/UPF3A/U2AF2/XPO5/AKAP8L/THOC6/MX2/CHTOP/DHX9	26
BP	GO:0038202	TORC1 signaling	9/1464	46/18866	0.00798047	0.426725	0.42164	MFSD8/TELO2/DGKQ/SIK3/SZT2/ITFG2/CARD11/SESN1/STK11	9
BP	GO:0009314	response to radiation	49/1464	447/18866	0.00894616	0.469753	0.464155	GUCA1C/IFI16/RBM4/OPN5/INTS3/ACTR5/MAPK13/INO80/RAD9A/UBE4B/CLK2/MAP3K4/LRP5/BRAT1/B4GALT2/POLG/CCDC66/HSF1/DNMT3B/GPR52/DCLRE1C/SPIDR/UIMC1/NPHP4/ATF4/TH/UVSSA/ATP1A2/GRK1/ERCC3/PML/TICRR/KAT5/ERCC8/EP300/METTL3/STK11/RGS9BP/TP53I13/BEST1/AEN/RDH13/MTA1/CRY2/CXCL12/SDF4/CABP4/MYC/OPN4	49
BP	GO:0032720	negative regulation of tumor necrosis factor production	10/1464	55/18866	0.00900152	0.469753	0.464155	TRIM27/NLRC3/ADIPOQ/HSF1/CACTIN/ARRB2/AKAP8/AXL/PTPN22/CIDEA	10
BP	GO:0042542	response to hydrogen peroxide	20/1464	146/18866	0.00912616	0.469753	0.464155	UBE3A/ANKZF1/KLF2/TXNIP/HBB/MAPK13/HGF/HSF1/ZNF580/ABL1/TRAP1/SETX/STK25/AXL/RPS3/FXN/PDE8A/STAT6/STK24/RNF112	20
BP	GO:0062207	regulation of pattern recognition receptor signaling pathway	15/1464	99/18866	0.0092035	0.469753	0.464155	LILRA2/ZCCHC3/LRRC14/GRAMD4/SEC14L1/CACTIN/FLOT1/DAB2IP/ARRB2/TIRAP/RSAD2/IRF7/TICAM1/PTPN22/CD300A	15
BP	GO:0042551	neuron maturation	9/1464	47/18866	0.00920752	0.469753	0.464155	GLDN/EPHA8/C1QA/FEV/RET/PICK1/KCNIP2/MTCH1/MYOC	9
BP	GO:0010770	positive regulation of cell morphogenesis involved in differentiation	21/1464	157/18866	0.0100002	0.501234	0.495261	GOLGA4/TRAK1/PARP6/SS18L1/FGB/LIMS2/CAPRIN2/NDEL1/RREB1/ZFYVE27/MEGF8/MPL/ABL1/STK25/CUL7/TRIOBP/STK11/CXCL12/MYOC/LPAR3/FBXO31	21
BP	GO:0061157	mRNA destabilization	7/1464	32/18866	0.0100453	0.501234	0.495261	YTHDF1/GIGYF2/DND1/ZFP36L2/METTL3/PLEKHN1/ROCK2	7
BP	GO:0060033	anatomical structure regression	5/1464	18/18866	0.0101851	0.501234	0.495261	OPN5/LRP5/TH/GLI1/OPN4	5
BP	GO:0072189	ureter development	5/1464	18/18866	0.0101851	0.501234	0.495261	SHH/LZTS2/NPHP3/ALDH1A2/RET	5
BP	GO:0032648	regulation of interferon-beta production	9/1464	48/18866	0.0105719	0.503679	0.497677	RNF135/NLRC3/CACTIN/FLOT1/TIRAP/IRF7/MAVS/POLR3D/DHX9	9
BP	GO:0051894	positive regulation of focal adhesion assembly	6/1464	25/18866	0.0106096	0.503679	0.497677	TSC1/PPM1F/HRG/SMAD3/ABL1/MYOC	6
BP	GO:0006338	chromatin remodeling	27/1464	218/18866	0.0106572	0.503679	0.497677	RERE/KAT2A/ATF7IP/EZH1/TAF6L/GATAD1/ACTR5/JARID2/SCMH1/PABPC1L/INO80/ARID1B/SETDB1/NAA40/CHD1L/PADI4/HNRNPC/DAXX/MYSM1/BAZ1B/SMARCD1/HDAC5/MYC/HCFC1/BAZ2A/VPS72/SIRT6	27
BP	GO:0051052	regulation of DNA metabolic process	41/1464	365/18866	0.0107584	0.503679	0.497677	THOC1/SH2B1/RAD52/USP7/CTC1/HNRNPA1/WRNIP1/HMBOX1/MAP3K4/HGF/MBD1/EXOSC6/ADIPOQ/HSF1/PARP3/CHTF18/DFFA/DDX11/SPIDR/UIMC1/MMS19/ARRB2/HNRNPC/PML/TICRR/ERCC8/PRDM14/FUS/RPS3/CDK9/UBR5/PAM16/STAT6/PARP4/MYC/PPP1R10/KMT2A/CIDEA/PIF1/SIRT6/DHX9	41
BP	GO:0015803	branched-chain amino acid transport	4/1464	12/18866	0.0107782	0.503679	0.497677	SLC7A8/LLGL2/SLC43A1/SLC38A7	4
BP	GO:1902510	regulation of apoptotic DNA fragmentation	4/1464	12/18866	0.0107782	0.503679	0.497677	HSF1/DFFA/PAM16/CIDEA	4
BP	GO:0051091	positive regulation of DNA-binding transcription factor activity	32/1464	270/18866	0.0109067	0.505434	0.499411	DHX33/TRIM27/SHH/TRIM22/WNT10B/PRKCB/SMAD3/TRIM25/TRIM52/LRP5/CARD11/PPARGC1B/STK36/IKBKB/FLOT1/TRAF5/ARID5B/EDA2R/TAB1/TIRAP/NOD1/TICAM1/EP300/PPRC1/LRRFIP1/HDAC5/RPS3/MAVS/EIF2AK2/PIDD1/CAPN3/DHX9	32
BP	GO:0031124	mRNA 3'-end processing	15/1464	101/18866	0.011007	0.505867	0.499839	SRSF6/THOC1/SYMPK/RPRD2/SRSF5/PABPC1L/POLDIP3/PCF11/PABPN1/HSF1/U2AF2/PAPOLA/THOC6/CDK9/CHTOP	15
BP	GO:0006635	fatty acid beta-oxidation	12/1464	74/18866	0.0111694	0.508109	0.502055	CPT1A/IVD/ECI2/ACADVL/ACAT1/ECI1/ADIPOQ/ACACB/PLIN5/ECH1/ABCD4/ECHDC2	12
BP	GO:0051588	regulation of neurotransmitter transport	17/1464	120/18866	0.0112385	0.508109	0.502055	DVL1/NAPB/PRKCB/NOS1/PPP1R9A/FBXL20/ASIC1/P2RY1/FLOT1/GDNF/P2RX1/ATP1A2/GIT1/STXBP5L/P2RY4/VAMP1/CACNB2	17
BP	GO:0051092	positive regulation of NF-kappaB transcription factor activity	21/1464	159/18866	0.0114721	0.50984	0.503765	DHX33/TRIM27/TRIM22/PRKCB/TRIM25/TRIM52/CARD11/IKBKB/FLOT1/TRAF5/EDA2R/TAB1/TIRAP/NOD1/TICAM1/LRRFIP1/RPS3/EIF2AK2/PIDD1/CAPN3/DHX9	21
BP	GO:0070534	protein K63-linked ubiquitination	10/1464	57/18866	0.0115519	0.50984	0.503765	RNF135/TRIM27/TRIM56/HECTD1/UBE2D4/TRAF5/PARP10/ZFP91/PTPN22/UBR5	10
BP	GO:1903556	negative regulation of tumor necrosis factor superfamily cytokine production	10/1464	57/18866	0.0115519	0.50984	0.503765	TRIM27/NLRC3/ADIPOQ/HSF1/CACTIN/ARRB2/AKAP8/AXL/PTPN22/CIDEA	10
BP	GO:0009954	proximal/distal pattern formation	7/1464	33/18866	0.0119158	0.514483	0.508352	HOXB9/ALDH1A2/GLI1/DLL1/HOXA11/LRP4/SIX3	7
BP	GO:0048384	retinoic acid receptor signaling pathway	7/1464	33/18866	0.0119158	0.514483	0.508352	KLF2/CYP26A1/RXRB/ALDH1A2/NR2C1/PML/ZNF536	7
BP	GO:0015695	organic cation transport	9/1464	49/18866	0.0120827	0.514483	0.508352	SLC7A8/SLC25A20/SLC25A45/NOS1/SEC14L1/SLC25A42/RALBP1/P2RX1/HRH3	9
BP	GO:0042149	cellular response to glucose starvation	9/1464	49/18866	0.0120827	0.514483	0.508352	IFI16/HNRNPA1/SZT2/ITFG2/SESN1/ATF4/ATG14/PICK1/MYBBP1A	9
BP	GO:1905039	carboxylic acid transmembrane transport	20/1464	150/18866	0.0121408	0.514483	0.508352	SLC7A8/CPT1A/SLC25A20/SLC38A5/SLC7A6/FOLR2/PRKAB2/SLC38A1/THRSP/SLC46A1/ACACB/SLC6A18/SLC43A1/LRRC8E/ATP1A2/EMB/SLC38A7/FOLR1/ABCD4/SLC7A4	20
BP	GO:0017038	protein import	25/1464	200/18866	0.0122121	0.514483	0.508352	TNPO2/POM121L12/TXNIP/SHH/POM121L2/SMAD3/PRICKLE1/CHCHD4/FAM53A/TMCO6/POM121/APOD/TOMM40/PML/NOLC1/KPNA5/GRPEL1/ANGPT1/UBR5/GPIHBP1/MAVS/PAM16/SIX3/PPP1R10/TIMM23B	25
BP	GO:0046323	glucose import	12/1464	75/18866	0.0123855	0.517862	0.511691	TERT/TSC1/C2CD5/GPC3/ADIPOQ/CAPN10/SORBS1/OCLN/KLF15/ZDHHC7/ARPP19/SIRT6	12
BP	GO:0002076	osteoblast development	5/1464	19/18866	0.0129558	0.531821	0.525484	PTH1R/SHH/LRP5L/SMAD3/LRP5	5
BP	GO:1903825	organic acid transmembrane transport	20/1464	151/18866	0.0130062	0.531821	0.525484	SLC7A8/CPT1A/SLC25A20/SLC38A5/SLC7A6/FOLR2/PRKAB2/SLC38A1/THRSP/SLC46A1/ACACB/SLC6A18/SLC43A1/LRRC8E/ATP1A2/EMB/SLC38A7/FOLR1/ABCD4/SLC7A4	20
BP	GO:2001056	positive regulation of cysteine-type endopeptidase activity	20/1464	151/18866	0.0130062	0.531821	0.525484	HIP1/IFI16/PPM1F/LGMN/SMAD3/GRAMD4/HSF1/NLRP1/P2RX1/MEFV/CASP10/CIDEB/PML/NOD1/MTCH1/RPS3/MYC/PIDD1/UACA/XDH	20
BP	GO:0017157	regulation of exocytosis	27/1464	222/18866	0.0133535	0.533153	0.5268	BCR/DVL1/SYT15/KCNB1/NAPB/FGB/PRKCB/FCGR2B/ATP13A2/SCAMP5/FBXL20/P2RY1/RAB12/P2RX1/RALB/RAB3D/PLA2G6/NPPA/GIT1/STXBP5L/RAB8A/RAB3C/P2RY4/CACNA1H/VAMP1/CACNB2/CD300A	27
BP	GO:0034308	primary alcohol metabolic process	14/1464	94/18866	0.0134226	0.533153	0.5268	CHKA/ADH1B/RBP4/DGKQ/SULT1A2/SULT1A1/ACSS1/SULT1C4/PNPLA2/ALDH1A2/CYP2C8/RETSAT/CACNA1H/RDH13	14
BP	GO:0033866	nucleoside bisphosphate biosynthetic process	11/1464	67/18866	0.0135182	0.533153	0.5268	PDK4/ACSS1/ACAT1/PDPR/DCAKD/PANK4/ACACB/FASN/ACSBG2/PDK2/TECR	11
BP	GO:0034030	ribonucleoside bisphosphate biosynthetic process	11/1464	67/18866	0.0135182	0.533153	0.5268	PDK4/ACSS1/ACAT1/PDPR/DCAKD/PANK4/ACACB/FASN/ACSBG2/PDK2/TECR	11
BP	GO:0034033	purine nucleoside bisphosphate biosynthetic process	11/1464	67/18866	0.0135182	0.533153	0.5268	PDK4/ACSS1/ACAT1/PDPR/DCAKD/PANK4/ACACB/FASN/ACSBG2/PDK2/TECR	11
BP	GO:0032092	positive regulation of protein binding	13/1464	85/18866	0.0136469	0.533851	0.527489	TERT/HOXA3/EPB41/CAPRIN2/HSF1/ABL1/FLOT1/RALB/MFNG/TICAM1/EP300/STK4/ADD1	13
BP	GO:0005996	monosaccharide metabolic process	34/1464	296/18866	0.0139112	0.533851	0.527489	PPP1R3E/OAS1/PDK4/GALK2/GALT/CPT1A/KAT2A/NISCH/RBP4/DGKQ/MST1/ADPGK/FOXK1/USP7/MAN2A2/OGT/PKLR/CLK2/LRP5/C1QTNF3/BRAT1/SERPINA12/ADIPOQ/ACACB/SORBS1/APOD/PGP/ATF4/EP300/BRS3/NLN/ARPP19/ENO3/PDK2	34
BP	GO:0002224	toll-like receptor signaling pathway	20/1464	152/18866	0.0139199	0.533851	0.527489	LILRA2/CNPY3/LRRC14/UNC93B1/LGMN/FGB/GRAMD4/IKBKB/CACTIN/FLOT1/DAB2IP/TAB1/ARRB2/TIRAP/RSAD2/IRF7/MAP3K1/TICAM1/PTPN22/CD300A	20
BP	GO:0051028	mRNA transport	20/1464	152/18866	0.0139199	0.533851	0.527489	SRSF6/THOC1/RBM15B/SYMPK/SRSF5/NPIPA1/NXF1/POLDIP3/HNRNPA1/PABPN1/UPF2/HSF1/POM121/UPF3A/U2AF2/AKAP8L/THOC6/MX2/CHTOP/DHX9	20
BP	GO:0000737	DNA catabolic process, endonucleolytic	7/1464	34/18866	0.0140251	0.534203	0.527837	DFFB/DNASE1/DNASE1L2/HSF1/DFFA/PAM16/CIDEA	7
BP	GO:0045815	positive regulation of gene expression, epigenetic	10/1464	59/18866	0.0146134	0.54589	0.539385	KAT2A/PABPC1L/ARID1B/TAF1D/POLR1A/EP300/BAZ1B/SMARCD1/ZMIZ2/MYBBP1A	10
BP	GO:0030205	dermatan sulfate metabolic process	4/1464	13/18866	0.0146264	0.54589	0.539385	IDUA/CHST12/BCAN/NCAN	4
BP	GO:0048096	chromatin-mediated maintenance of transcription	4/1464	13/18866	0.0146264	0.54589	0.539385	PABPC1L/ARID1B/SMARCD1/ZMIZ2	4
BP	GO:0031123	RNA 3'-end processing	20/1464	153/18866	0.0148834	0.551778	0.545204	SRSF6/THOC1/SYMPK/RPRD2/SRSF5/PABPC1L/POLDIP3/PCF11/PABPN1/EXOSC6/HSF1/ELAC2/U2AF2/PAPOLA/SUPV3L1/THOC6/INTS1/EXOSC7/CDK9/CHTOP	20
BP	GO:0009063	cellular amino acid catabolic process	17/1464	124/18866	0.0152828	0.557435	0.550793	CSAD/IVD/PPM1K/ADHFE1/CARNS1/ACAT1/NOS1/HOGA1/DBT/MPST/BCAT2/ACMSD/MCCC2/MCCC1/OGDH/AMT/PHYKPL	17
BP	GO:0051168	nuclear export	25/1464	204/18866	0.0153905	0.557435	0.550793	SRSF6/TSC1/THOC1/RBM15B/POM121L12/SYMPK/SRSF5/CCHCR1/RRS1/POM121L2/NXF1/POLDIP3/HNRNPA1/LZTS2/PABPN1/UPF2/POM121/U2AF2/XPO5/AKAP8L/THOC6/PRKACA/XPO6/CHTOP/DHX9	25
BP	GO:0034504	protein localization to nucleus	32/1464	277/18866	0.0154255	0.557435	0.550793	TERT/SUN1/TNPO2/DVL1/POM121L12/TXNIP/SHH/CDK5RAP3/RRS1/POM121L2/SMAD3/LZTS2/PRICKLE1/SUPT7L/ATP13A2/FAM53A/TMCO6/POM121/NOL8/APOD/PML/POLR1A/NOLC1/KPNA5/STK11/ANGPT1/UBR5/MAVS/SIX3/PPP1R10/TBRG1/NR5A1	32
BP	GO:0062014	negative regulation of small molecule metabolic process	15/1464	105/18866	0.015437	0.557435	0.550793	MST1/ACADVL/CLK2/NCOR1/C1QTNF3/SERPINA12/ADIPOQ/ACACB/SLC4A1/PGP/ACMSD/PLIN5/SCAP/EP300/SIRT6	15
BP	GO:0065002	intracellular protein transmembrane transport	9/1464	51/18866	0.0155784	0.558912	0.552252	C2CD5/BCR/CHCHD4/TOMM40/GRPEL1/SEC61A2/PAM16/TRAM2/TIMM23B	9
BP	GO:0034138	toll-like receptor 3 signaling pathway	5/1464	20/18866	0.0161938	0.575836	0.568975	UNC93B1/FLOT1/TIRAP/TICAM1/PTPN22	5
BP	GO:0030521	androgen receptor signaling pathway	8/1464	43/18866	0.0162572	0.575836	0.568975	UBE3A/DDX17/NCOR1/ARRB2/SAFB2/EP300/DAXX/FKBP4	8
BP	GO:0030099	myeloid cell differentiation	46/1464	431/18866	0.0171815	0.604725	0.597519	C1QC/SOX6/P4HTM/IFI16/SLC9B2/BRD1/L3MBTL1/KLF2/CCR7/CDK5RAP3/PRKCB/GLO1/EIF2AK1/NCOA6/GPC3/TCTA/PPARGC1B/ADIPOQ/MPL/TNRC6A/AGO4/SLC4A1/TIRAP/L3MBTL3/ISG15/FAXDC2/PML/IRF7/KMT2D/DLL1/KLF13/RASGRP4/EP300/ANKRD54/IL17A/FASN/MTURN/ACIN1/KMT2B/IL20/ALAS2/ADAR/MYC/KMT2A/NBEAL2/ADD1	46
BP	GO:0034968	histone lysine methylation	16/1464	116/18866	0.0172968	0.604954	0.597746	EZH1/RTF1/JARID2/OGT/SETDB1/CXXC1/TTLL12/EHMT2/SETD5/DNMT3B/ZNF274/ZNF335/KMT2D/KMT2B/SETD6/KMT2A	16
BP	GO:0071897	DNA biosynthetic process	24/1464	196/18866	0.0174833	0.607653	0.600412	TERT/SH2B1/TELO2/CTC1/HNRNPA1/WRNIP1/HMBOX1/MAP3K4/TRIM25/HGF/POLG/ADIPOQ/PARP3/CHTF18/POLM/ARRB2/POLDIP2/ISG15/PARP10/HNRNPC/PARP4/MYC/POLI/PIF1	24
BP	GO:0046324	regulation of glucose import	10/1464	61/18866	0.0182424	0.6301	0.622592	TERT/C2CD5/GPC3/ADIPOQ/CAPN10/SORBS1/OCLN/KLF15/ARPP19/SIRT6	10
BP	GO:0007205	protein kinase C-activating G protein-coupled receptor signaling pathway	6/1464	28/18866	0.0185017	0.635112	0.627544	DGKA/DGKQ/PICK1/DGKD/DGKE/GAP43	6
BP	GO:0043666	regulation of phosphoprotein phosphatase activity	16/1464	117/18866	0.0186425	0.636019	0.62844	TSC1/URI1/SLC39A10/IKBKB/PPP6R2/PPP1R35/CABIN1/ARPP19/PHACTR1/CRY2/DMPK/ROCK2/PPP2R5D/EIF2AK2/CD300A/PPP1R10	16
BP	GO:0009214	cyclic nucleotide catabolic process	4/1464	14/18866	0.0192417	0.636923	0.629333	PDE2A/PDE8A/PDE5A/PDE7A	4
BP	GO:0010889	regulation of sequestering of triglyceride	4/1464	14/18866	0.0192417	0.636923	0.629333	PNPLA2/PLIN5/FITM1/CIDEA	4
BP	GO:0072216	positive regulation of metanephros development	4/1464	14/18866	0.0192417	0.636923	0.629333	ADIPOQ/GDNF/RET/MYC	4
BP	GO:1902570	protein localization to nucleolus	4/1464	14/18866	0.0192417	0.636923	0.629333	TERT/RRS1/NOL8/POLR1A	4
BP	GO:1903624	regulation of DNA catabolic process	4/1464	14/18866	0.0192417	0.636923	0.629333	HSF1/DFFA/PAM16/CIDEA	4
BP	GO:0035384	thioester biosynthetic process	9/1464	53/18866	0.0197643	0.644294	0.636617	PDK4/ACSS1/ACAT1/PDPR/ACACB/FASN/ACSBG2/PDK2/TECR	9
BP	GO:0071616	acyl-CoA biosynthetic process	9/1464	53/18866	0.0197643	0.644294	0.636617	PDK4/ACSS1/ACAT1/PDPR/ACACB/FASN/ACSBG2/PDK2/TECR	9
BP	GO:0010847	regulation of chromatin assembly	5/1464	21/18866	0.0199278	0.644294	0.636617	ATF7IP/SETDB1/NAA40/PARP10/SIRT6	5
BP	GO:0099515	actin filament-based transport	5/1464	21/18866	0.0199278	0.644294	0.636617	MYO19/SYNE2/MYO5C/MYO1G/MYO7B	5
BP	GO:0007029	endoplasmic reticulum organization	11/1464	71/18866	0.0203315	0.653547	0.645759	SEC16B/LMAN1L/SEC31B/BAG6/ZFYVE27/GET4/SEC16A/TMEM170A/TRAM2/MIA3/RNF112	11
BP	GO:0034976	response to endoplasmic reticulum stress	33/1464	294/18866	0.0206618	0.660346	0.652478	TMEM129/ANKZF1/CDK5RAP3/ACADVL/TMUB2/UBE4B/CXXC1/TRIM25/FCGR2B/BAG6/ERP29/SCAMP5/ARFGAP1/GET4/MAN1B1/DDX11/FLOT1/DAB2IP/SEC16A/ATF4/USP19/HM13/PLA2G6/STT3B/UFC1/CUL7/PML/TLN1/EP300/TATDN2/EIF2AK2/CREB3L2/ADD1	33
BP	GO:0034122	negative regulation of toll-like receptor signaling pathway	8/1464	45/18866	0.0210827	0.667586	0.659631	LILRA2/LRRC14/GRAMD4/CACTIN/DAB2IP/ARRB2/TICAM1/CD300A	8
BP	GO:0090630	activation of GTPase activity	15/1464	109/18866	0.0211284	0.667586	0.659631	TBC1D14/TSC1/BCR/CCR7/TBC1D1/TBC1D9B/RALGAPB/SGSM2/SCRIB/ARHGEF15/NDEL1/TBC1D17/RABGAP1/TBC1D5/ARHGEF16	15
BP	GO:0006109	regulation of carbohydrate metabolic process	25/1464	210/18866	0.0213541	0.670904	0.66291	PPP1R3E/PDK4/KAT2A/PTH1R/DGKQ/MST1/FOXK1/USP7/OGT/CLK2/NCOR1/C1QTNF3/P2RY1/SERPINA12/ADIPOQ/ACACB/SLC4A1/POM121/SORBS1/PGP/EP300/NLN/ARPP19/PDK2/SIRT6	25
BP	GO:0019048	modulation by virus of host process	6/1464	29/18866	0.0218387	0.674696	0.666656	CD209/SCRIB/PABPN1/CLEC4M/KPNA5/EIF2AK2	6
BP	GO:0050855	regulation of B cell receptor signaling pathway	6/1464	29/18866	0.0218387	0.674696	0.666656	PRKCB/FCGR2B/SLC39A10/PTPN22/CD300A/ELF2	6
BP	GO:0150117	positive regulation of cell-substrate junction organization	6/1464	29/18866	0.0218387	0.674696	0.666656	TSC1/PPM1F/HRG/SMAD3/ABL1/MYOC	6
BP	GO:0045069	regulation of viral genome replication	14/1464	100/18866	0.0221549	0.680683	0.672572	OAS1/OAS2/IFI16/SETDB1/ISG15/PARP10/RSAD2/BST2/OASL/CCL8/ADAR/MAVS/EIF2AK2/SRPK1	14
BP	GO:0018205	peptidyl-lysine modification	43/1464	405/18866	0.022366	0.68228	0.67415	KAT2A/EZH1/BRD1/BRPF3/TAF6L/RTF1/CTBP1/ING5/JARID2/OGT/SETDB1/MEAF6/CXXC1/KANSL3/NOS1/SUPT7L/JADE1/TTLL12/BAG6/DOHH/EHMT2/SETD5/NAA40/DNMT3B/POM121/GLYR1/KLF15/ATAT1/KANSL1L/ZNF274/ZNF335/KMT2D/TRRAP/KAT5/EP300/MSL1/KMT2B/SETD6/EP400/HCFC1/KMT2A/CAPN3/TAF6	43
BP	GO:0031647	regulation of protein stability	33/1464	296/18866	0.0225567	0.68228	0.67415	TERT/TSC1/HIP1/KAT2A/DVL1/ATF7IP/HPS4/TELO2/USP7/WNT10B/SMAD3/BAG6/OTUD3/INSC/GET4/CCDC88C/COG3/FLOT1/SEC16A/USP19/HYPK/QRSL1/MDM4/EP300/STK4/CDC37/USP36/GPIHBP1/HCFC1/TBRG1/ATP1B2/CAPN3/SIRT6	33
BP	GO:0032680	regulation of tumor necrosis factor production	15/1464	110/18866	0.0227715	0.68228	0.67415	TRIM27/NLRC3/ADIPOQ/HSF1/CACTIN/ARRB2/TIRAP/NOD1/TICAM1/AKAP8/AXL/PTPN22/ANGPT1/MAVS/CIDEA	15
BP	GO:0002221	pattern recognition receptor signaling pathway	24/1464	201/18866	0.0230061	0.68228	0.67415	RNF135/LILRA2/CNPY3/ZCCHC3/LRRC14/UNC93B1/LGMN/FGB/GRAMD4/SEC14L1/IKBKB/CACTIN/FLOT1/DAB2IP/TAB1/ARRB2/TIRAP/RSAD2/IRF7/MAP3K1/NOD1/TICAM1/PTPN22/CD300A	24
BP	GO:0006606	protein import into nucleus	19/1464	150/18866	0.0233502	0.68228	0.67415	TNPO2/POM121L12/TXNIP/SHH/POM121L2/SMAD3/PRICKLE1/FAM53A/TMCO6/POM121/APOD/PML/NOLC1/KPNA5/ANGPT1/UBR5/MAVS/SIX3/PPP1R10	19
BP	GO:0000959	mitochondrial RNA metabolic process	8/1464	46/18866	0.0238411	0.68228	0.67415	AARS2/TRMT10B/CDK5RAP1/FASTKD1/PPARGC1B/ELAC2/SUPV3L1/SARS2	8
BP	GO:0051646	mitochondrion localization	8/1464	46/18866	0.0238411	0.68228	0.67415	MYO19/TRAK1/KAT2A/MSTO1/RHOT2/BRAT1/PLIN5/CLUH	8
BP	GO:0006067	ethanol metabolic process	5/1464	22/18866	0.0241833	0.68228	0.67415	ADH1B/SULT1A2/SULT1A1/ACSS1/SULT1C4	5
BP	GO:0006085	acetyl-CoA biosynthetic process	5/1464	22/18866	0.0241833	0.68228	0.67415	PDK4/ACSS1/ACAT1/PDPR/PDK2	5
BP	GO:0009235	cobalamin metabolic process	5/1464	22/18866	0.0241833	0.68228	0.67415	MMACHC/ABCC1/ABCD4/CD320/CTRB2	5
BP	GO:0071359	cellular response to dsRNA	5/1464	22/18866	0.0241833	0.68228	0.67415	ZCCHC3/FLOT1/RALB/MAVS/DHX9	5
BP	GO:0051170	import into nucleus	21/1464	171/18866	0.0242898	0.68228	0.67415	TNPO2/POM121L12/TXNIP/SHH/POM121L2/HNRNPA1/SMAD3/PRICKLE1/FAM53A/TMCO6/POM121/APOD/PML/NOLC1/KPNA5/ANGPT1/UBR5/MAVS/SIX3/PPP1R10/BACH2	21
BP	GO:0034440	lipid oxidation	15/1464	111/18866	0.0245088	0.68228	0.67415	PDK4/CPT1A/IVD/ECI2/ACADVL/ACAT1/ECI1/ADIPOQ/ACACB/ILVBL/APOD/PLIN5/ECH1/ABCD4/ECHDC2	15
BP	GO:0006646	phosphatidylethanolamine biosynthetic process	4/1464	15/18866	0.0246607	0.68228	0.67415	CHKA/CHKB/PCYT2/ETNK2	4
BP	GO:0015936	coenzyme A metabolic process	4/1464	15/18866	0.0246607	0.68228	0.67415	ACAT1/DCAKD/PANK4/MCCC2	4
BP	GO:0018298	protein-chromophore linkage	4/1464	15/18866	0.0246607	0.68228	0.67415	OPN5/AMBP/CRY2/OPN4	4
BP	GO:0060339	negative regulation of type I interferon-mediated signaling pathway	4/1464	15/18866	0.0246607	0.68228	0.67415	TTLL12/CACTIN/METTL3/ADAR	4
BP	GO:0071025	RNA surveillance	4/1464	15/18866	0.0246607	0.68228	0.67415	DXO/EXOSC6/SUPV3L1/EXOSC7	4
BP	GO:0090110	COPII-coated vesicle cargo loading	4/1464	15/18866	0.0246607	0.68228	0.67415	SEC31B/SCAP/SEC24C/MIA3	4
BP	GO:0099171	presynaptic modulation of chemical synaptic transmission	4/1464	15/18866	0.0246607	0.68228	0.67415	PRKCB/FBXL20/GIT1/CACNB2	4
BP	GO:0031058	positive regulation of histone modification	13/1464	92/18866	0.025068	0.685342	0.677176	KAT2A/RTF1/CTBP1/JARID2/OGT/NOS1/DNMT3B/GLYR1/AKAP8L/AKAP8/CDK9/KMT2A/CHTOP	13
BP	GO:0006084	acetyl-CoA metabolic process	7/1464	38/18866	0.0251411	0.685342	0.677176	PDK4/ACSS1/ACAT1/PDPR/ACACB/FASN/PDK2	7
BP	GO:1903432	regulation of TORC1 signaling	7/1464	38/18866	0.0251411	0.685342	0.677176	TELO2/DGKQ/SIK3/SZT2/ITFG2/SESN1/STK11	7
BP	GO:0032728	positive regulation of interferon-beta production	6/1464	30/18866	0.0255588	0.689965	0.681743	RNF135/FLOT1/IRF7/MAVS/POLR3D/DHX9	6
BP	GO:0046337	phosphatidylethanolamine metabolic process	6/1464	30/18866	0.0255588	0.689965	0.681743	CHKA/CHKB/PLA2G6/PCYT2/ETNK2/PLA2G15	6
BP	GO:0048872	homeostasis of number of cells	29/1464	256/18866	0.0257069	0.690608	0.682379	SLC40A1/BCR/SOX6/P4HTM/DNAJA3/BRD1/KLF2/CCR7/CDK5RAP3/GIGYF2/CARD11/NCSTN/MPL/SLC4A1/ABL1/SPNS2/RPS17/L3MBTL3/ISG15/KLF13/PRDM14/ANKRD54/AXL/ACIN1/ALAS2/ADAR/UBAP2L/ADD1/CXCR2	29
BP	GO:0000302	response to reactive oxygen species	27/1464	235/18866	0.0260697	0.692469	0.684218	UBE3A/ANKZF1/KLF2/CCR7/TXNIP/HBB/MAPK13/SZT2/HGF/PPARGC1B/HSF1/ZNF580/ABL1/TRAP1/APOD/MPO/SETX/SESN1/STK25/AXL/RPS3/FXN/PDE8A/PDK2/STAT6/STK24/RNF112	27
BP	GO:1903305	regulation of regulated secretory pathway	20/1464	162/18866	0.0260987	0.692469	0.684218	BCR/DVL1/SYT15/KCNB1/NAPB/PRKCB/FCGR2B/SCAMP5/FBXL20/P2RY1/P2RX1/RAB3D/NPPA/GIT1/STXBP5L/P2RY4/CACNA1H/VAMP1/CACNB2/CD300A	20
BP	GO:0071248	cellular response to metal ion	23/1464	193/18866	0.0261497	0.692469	0.684218	SLC40A1/SYT15/SLC25A23/HVCN1/SHH/RASGRP2/LGMN/CPNE1/ATP13A2/NCSTN/HSF1/MCOLN1/FABP4/ATF4/TH/RASAL1/DAXX/FUS/CACNA1H/KCNA1/MTF1/CAPN3/ADD1	23
BP	GO:0034470	ncRNA processing	42/1464	400/18866	0.0278979	0.735261	0.7265	NSUN5P1/QTRT1/AARS2/NOL9/INTS3/NSUN6/TSEN54/DDX17/RRS1/NSUN5/DTWD1/ZCCHC8/SMAD3/RPL7L1/TRMT10B/THUMPD2/CDK5RAP1/PWP2/EXOSC6/ELAC2/ISG20L2/AGO4/RPS28/ALKBH1/NOL8/RPS17/PDCD11/GTPBP3/NOP2/TRMT1/INTS1/NOLC1/MDN1/METTL3/RRP9/USP36/EXOSC7/TSEN2/TRMU/ADAR/TSEN34/SRRT	42
BP	GO:1903555	regulation of tumor necrosis factor superfamily cytokine production	15/1464	113/18866	0.0282776	0.736778	0.727998	TRIM27/NLRC3/ADIPOQ/HSF1/CACTIN/ARRB2/TIRAP/NOD1/TICAM1/AKAP8/AXL/PTPN22/ANGPT1/MAVS/CIDEA	15
BP	GO:0016571	histone methylation	18/1464	143/18866	0.0283067	0.736778	0.727998	EZH1/RTF1/JARID2/OGT/SETDB1/CXXC1/TTLL12/EHMT2/SETD5/DNMT3B/ZNF274/ZNF335/KMT2D/PRDM14/KMT2B/SETD6/KMT2A/CHTOP	18
BP	GO:0001510	RNA methylation	12/1464	84/18866	0.0283529	0.736778	0.727998	NSUN5P1/RBM15B/NSUN6/NSUN5/RNMT/TRMT10B/THUMPD2/GTPBP3/NOP2/TRMT1/METTL3/CMTR1	12
BP	GO:1902275	regulation of chromatin organization	23/1464	195/18866	0.0290479	0.750611	0.741667	KAT2A/ATF7IP/RTF1/CTBP1/JARID2/OGT/SETDB1/NOS1/SETD5/NAA40/DNMT3B/GLYR1/AKAP8L/PARP10/ZNF274/ZNF335/AKAP8/KMT2B/CDK9/UBR5/KMT2A/CHTOP/SIRT6	23
BP	GO:0015909	long-chain fatty acid transport	11/1464	75/18866	0.0293909	0.750611	0.741667	CPT1A/SLC25A20/PRKAB2/THRSP/NMUR2/ACACB/SLC27A3/FABP4/PLA2G6/PROCA1/ABCD4	11
BP	GO:0009154	purine ribonucleotide catabolic process	6/1464	31/18866	0.0296774	0.750611	0.741667	NUDT3/ACAT1/PDE2A/PDE8A/PDE5A/PDE7A	6
BP	GO:0002262	myeloid cell homeostasis	19/1464	154/18866	0.0297393	0.750611	0.741667	SOX6/P4HTM/BRD1/KLF2/CDK5RAP3/NCSTN/MPL/SLC4A1/RPS17/L3MBTL3/ISG15/KLF13/ANKRD54/AXL/ACIN1/ALAS2/ADAR/ADD1/CXCR2	19
BP	GO:1901606	alpha-amino acid catabolic process	14/1464	104/18866	0.0299794	0.750611	0.741667	CSAD/IVD/ADHFE1/CARNS1/ACAT1/NOS1/HOGA1/BCAT2/ACMSD/MCCC2/MCCC1/OGDH/AMT/PHYKPL	14
BP	GO:0001819	positive regulation of cytokine production	46/1464	447/18866	0.0302036	0.750611	0.741667	RNF135/LILRA2/ZCCHC3/IFI16/DHX33/CCR7/MAPK13/NOX1/SMAD3/SCRIB/HGF/SEC14L1/SCAMP5/CARD11/C1QTNF3/ADIPOQ/MMP8/DEFB124/ZNF580/FLOT1/NLRP1/SLAMF6/IFNL1/ATF4/NLRP10/IL17D/TIRAP/SIGLEC16/RSAD2/IRF7/NOD1/TICAM1/EP300/IL17A/LRRFIP1/PTPN22/RPS3/ZBP1/MAVS/ROCK2/STAT6/CRCP/EIF2AK2/POLR3D/SPTBN1/DHX9	46
BP	GO:0098693	regulation of synaptic vesicle cycle	15/1464	114/18866	0.0303151	0.750611	0.741667	DVL1/DGKQ/NAPB/PRKCB/FBXL20/P2RY1/PPP3CC/P2RX1/PRKAR1B/GIT1/STXBP5L/P2RY4/DNAJC5/VAMP1/CACNB2	15
BP	GO:0010921	regulation of phosphatase activity	21/1464	175/18866	0.0303939	0.750611	0.741667	TSC1/URI1/CEP192/CDK5RAP3/SMAD3/SLC39A10/PPARGC1B/IKBKB/PPP6R2/PPP1R35/CABIN1/ARPP19/SFI1/PHACTR1/CRY2/DMPK/ROCK2/PPP2R5D/EIF2AK2/CD300A/PPP1R10	21
BP	GO:0030397	membrane disassembly	4/1464	16/18866	0.0309099	0.750611	0.741667	NEK9/PRKCB/NDEL1/AKAP8L	4
BP	GO:0048311	mitochondrion distribution	4/1464	16/18866	0.0309099	0.750611	0.741667	TRAK1/KAT2A/MSTO1/CLUH	4
BP	GO:0050655	dermatan sulfate proteoglycan metabolic process	4/1464	16/18866	0.0309099	0.750611	0.741667	IDUA/CHST12/BCAN/NCAN	4
BP	GO:0051081	nuclear envelope disassembly	4/1464	16/18866	0.0309099	0.750611	0.741667	NEK9/PRKCB/NDEL1/AKAP8L	4
BP	GO:0055119	relaxation of cardiac muscle	4/1464	16/18866	0.0309099	0.750611	0.741667	GSTM2/KCNJ2/ATP1A2/PDE5A	4
BP	GO:1902514	regulation of calcium ion transmembrane transport via high voltage-gated calcium channel	4/1464	16/18866	0.0309099	0.750611	0.741667	CACNG6/NOS1/NPPA/CACNB2	4
BP	GO:1904262	negative regulation of TORC1 signaling	4/1464	16/18866	0.0309099	0.750611	0.741667	SZT2/ITFG2/SESN1/STK11	4
BP	GO:0016054	organic acid catabolic process	31/1464	282/18866	0.0312595	0.752528	0.743561	CSAD/CPT1A/IVD/ECI2/PPM1K/ADHFE1/CYP26A1/ACADVL/CARNS1/ACAT1/NOS1/HOGA1/IDUA/ECI1/ADIPOQ/ACACB/ILVBL/DBT/MPST/BCAT2/ACMSD/PLIN5/MCCC2/MCCC1/OGDH/AMT/PLA2G15/ECH1/ABCD4/ECHDC2/PHYKPL	31
BP	GO:0046395	carboxylic acid catabolic process	31/1464	282/18866	0.0312595	0.752528	0.743561	CSAD/CPT1A/IVD/ECI2/PPM1K/ADHFE1/CYP26A1/ACADVL/CARNS1/ACAT1/NOS1/HOGA1/IDUA/ECI1/ADIPOQ/ACACB/ILVBL/DBT/MPST/BCAT2/ACMSD/PLIN5/MCCC2/MCCC1/OGDH/AMT/PLA2G15/ECH1/ABCD4/ECHDC2/PHYKPL	31
BP	GO:0051668	localization within membrane	13/1464	95/18866	0.0316798	0.759359	0.750311	YJEFN3/DNAJA3/DVL1/WDR19/SEC31B/ITGA4/SCRIB/PICK1/SCAP/LRP4/SEC24C/MIA3/SHISA6	13
BP	GO:0006836	neurotransmitter transport	26/1464	229/18866	0.0324697	0.774952	0.765718	SLC29A2/DVL1/NAPB/PRKCB/SCRIB/NOS1/SLC38A1/PPP1R9A/FBXL20/ASIC1/P2RY1/SLC6A18/FLOT1/GDNF/P2RX1/TH/ATP1A2/GRM4/SYN3/GIT1/STXBP5L/P2RY4/DNAJC5/VAMP1/HRH3/CACNB2	26
BP	GO:0044262	cellular carbohydrate metabolic process	32/1464	294/18866	0.0327368	0.777989	0.768719	PPP1R3E/INPP5E/PDK4/GALK2/KAT2A/PHKA1/PTH1R/NDST3/DGKQ/MST1/FOXK1/USP7/OGT/PHKB/CLK2/NCOR1/C1QTNF3/P2RY1/SERPINA12/IDUA/ADIPOQ/ACACB/SLC4A1/SORBS1/PGP/ITPK1/GYG2/EP300/NLN/ARPP19/PDK2/SIRT6	32
BP	GO:0008589	regulation of smoothened signaling pathway	12/1464	86/18866	0.0333324	0.788344	0.77895	SHH/ULK3/WDR11/GPC3/STK36/MEGF8/MGRN1/GLI1/IFT140/PRKACA/SCUBE3/TULP3	12
BP	GO:0061647	histone H3-K9 modification	8/1464	49/18866	0.0336121	0.788344	0.77895	JARID2/SETDB1/EHMT2/SETD5/DNMT3B/ZNF274/KMT2A/SIRT6	8
BP	GO:0009261	ribonucleotide catabolic process	6/1464	32/18866	0.0342079	0.788344	0.77895	NUDT3/ACAT1/PDE2A/PDE8A/PDE5A/PDE7A	6
BP	GO:0042738	exogenous drug catabolic process	5/1464	24/18866	0.0343408	0.788344	0.77895	NOS1/CYP2A6/CYP2C9/CYP2C8/CYP2A7	5
BP	GO:0019395	fatty acid oxidation	14/1464	106/18866	0.0345728	0.788344	0.77895	PDK4/CPT1A/IVD/ECI2/ACADVL/ACAT1/ECI1/ADIPOQ/ACACB/ILVBL/PLIN5/ECH1/ABCD4/ECHDC2	14
BP	GO:0032640	tumor necrosis factor production	15/1464	116/18866	0.03471	0.788344	0.77895	TRIM27/NLRC3/ADIPOQ/HSF1/CACTIN/ARRB2/TIRAP/NOD1/TICAM1/AKAP8/AXL/PTPN22/ANGPT1/MAVS/CIDEA	15
BP	GO:0032642	regulation of chemokine production	10/1464	68/18866	0.0361789	0.788344	0.77895	MAP2K5/C1QTNF3/ADIPOQ/DEFB124/APOD/MEFV/TIRAP/IL17A/MAVS/EIF2AK2	10
BP	GO:0030100	regulation of endocytosis	24/1464	210/18866	0.0362371	0.788344	0.77895	ITSN1/HIP1/ANKRD13B/DGKQ/RUFY2/SCRIB/GPC3/PROM2/SCAMP5/ANKFY1/ARFGAP1/PPP3CC/ABL1/FLOT1/TNK2/ARRB2/PICK1/NUMB/TBC1D5/DGKD/DLL1/AXL/ANGPT1/CD300A	24
BP	GO:0071241	cellular response to inorganic substance	25/1464	221/18866	0.0367965	0.788344	0.77895	SLC40A1/SYT15/SLC25A23/HVCN1/SHH/RASGRP2/LGMN/CPNE1/ATP13A2/NCSTN/HSF1/MCOLN1/FABP4/DDX11/SPIDR/ATF4/TH/RASAL1/DAXX/FUS/CACNA1H/KCNA1/MTF1/CAPN3/ADD1	25
BP	GO:0009416	response to light stimulus	34/1464	319/18866	0.036927	0.788344	0.77895	GUCA1C/RBM4/OPN5/ACTR5/MAPK13/INO80/UBE4B/MAP3K4/B4GALT2/POLG/CCDC66/GPR52/NPHP4/ATF4/TH/UVSSA/ATP1A2/GRK1/ERCC3/PML/ERCC8/EP300/METTL3/STK11/RGS9BP/TP53I13/BEST1/RDH13/MTA1/CRY2/SDF4/CABP4/MYC/OPN4	34
BP	GO:0002887	negative regulation of myeloid leukocyte mediated immunity	3/1464	10/18866	0.0370126	0.788344	0.77895	BCR/FCGR2B/CD300A	3
BP	GO:0003376	sphingosine-1-phosphate receptor signaling pathway	3/1464	10/18866	0.0370126	0.788344	0.77895	S1PR5/SPNS2/S1PR4	3
BP	GO:0007220	Notch receptor processing	3/1464	10/18866	0.0370126	0.788344	0.77895	APH1B/NCSTN/APH1A	3
BP	GO:0015808	L-alanine transport	3/1464	10/18866	0.0370126	0.788344	0.77895	SLC7A8/SLC38A5/SLC38A7	3
BP	GO:0015937	coenzyme A biosynthetic process	3/1464	10/18866	0.0370126	0.788344	0.77895	ACAT1/DCAKD/PANK4	3
BP	GO:0030202	heparin metabolic process	3/1464	10/18866	0.0370126	0.788344	0.77895	NDST3/IDUA/ANGPT1	3
BP	GO:0032070	regulation of deoxyribonuclease activity	3/1464	10/18866	0.0370126	0.788344	0.77895	DFFA/DDX11/RPS3	3
BP	GO:0034154	toll-like receptor 7 signaling pathway	3/1464	10/18866	0.0370126	0.788344	0.77895	UNC93B1/RSAD2/PTPN22	3
BP	GO:0034163	regulation of toll-like receptor 9 signaling pathway	3/1464	10/18866	0.0370126	0.788344	0.77895	GRAMD4/RSAD2/PTPN22	3
BP	GO:0072203	cell proliferation involved in metanephros development	3/1464	10/18866	0.0370126	0.788344	0.77895	SHH/GPC3/MYC	3
BP	GO:1904526	regulation of microtubule binding	3/1464	10/18866	0.0370126	0.788344	0.77895	HSF1/ABL1/TTBK2	3
BP	GO:0051054	positive regulation of DNA metabolic process	23/1464	200/18866	0.0373558	0.788344	0.77895	USP7/HNRNPA1/HMBOX1/MAP3K4/HGF/EXOSC6/HSF1/PARP3/CHTF18/DDX11/SPIDR/UIMC1/MMS19/ARRB2/PML/ERCC8/FUS/RPS3/STAT6/MYC/PPP1R10/SIRT6/DHX9	23
BP	GO:0061014	positive regulation of mRNA catabolic process	8/1464	50/18866	0.0373956	0.788344	0.77895	YTHDF1/GIGYF2/DND1/TNRC6A/ZFP36L2/METTL3/PLEKHN1/ROCK2	8
BP	GO:0048469	cell maturation	21/1464	179/18866	0.0375856	0.788344	0.77895	GLDN/EPHA8/C1QA/BRD1/PTH1R/KLF2/REC8/PABPC1L/FEV/CATSPER3/RET/PICK1/KCNIP2/L3MBTL3/CDC25B/MTCH1/AXL/PRKACA/SIX3/MYOC/GDF11	21
BP	GO:0072332	intrinsic apoptotic signaling pathway by p53 class mediator	11/1464	78/18866	0.0378589	0.788344	0.77895	IFI16/TP73/BAG6/EDA2R/SHISA5/PML/EP300/STK11/AEN/PDK2/MYBBP1A	11
BP	GO:0000963	mitochondrial RNA processing	4/1464	17/18866	0.0380055	0.788344	0.77895	TRMT10B/CDK5RAP1/ELAC2/SUPV3L1	4
BP	GO:0016246	RNA interference	4/1464	17/18866	0.0380055	0.788344	0.77895	TERT/XPO5/ADAR/DHX9	4
BP	GO:0030730	sequestering of triglyceride	4/1464	17/18866	0.0380055	0.788344	0.77895	PNPLA2/PLIN5/FITM1/CIDEA	4
BP	GO:0032682	negative regulation of chemokine production	4/1464	17/18866	0.0380055	0.788344	0.77895	MAP2K5/C1QTNF3/APOD/MEFV	4
BP	GO:0043968	histone H2A acetylation	4/1464	17/18866	0.0380055	0.788344	0.77895	MEAF6/NAA40/TRRAP/EP400	4
BP	GO:0048243	norepinephrine secretion	4/1464	17/18866	0.0380055	0.788344	0.77895	NISCH/KCNB1/P2RY1/HRH3	4
BP	GO:0048385	regulation of retinoic acid receptor signaling pathway	4/1464	17/18866	0.0380055	0.788344	0.77895	KLF2/CYP26A1/NR2C1/ZNF536	4
BP	GO:0051580	regulation of neurotransmitter uptake	4/1464	17/18866	0.0380055	0.788344	0.77895	NOS1/FLOT1/GDNF/ATP1A2	4
BP	GO:0099509	regulation of presynaptic cytosolic calcium ion concentration	4/1464	17/18866	0.0380055	0.788344	0.77895	P2RY1/P2RX1/P2RY4/CACNB2	4
BP	GO:0030522	intracellular receptor signaling pathway	29/1464	265/18866	0.0381342	0.788344	0.77895	RNF135/UBE3A/ZCCHC3/KLF2/DDX17/CYP26A1/NCOR1/SEC14L1/PPARGC1B/RXRB/TAB1/ALDH1A2/ARRB2/CALCOCO1/PLIN5/NR2C1/SAFB2/PML/IRF7/NOD1/KMT2D/EP300/DAXX/PTPN22/FKBP4/UBR5/ZNF536/CRY2/NR5A1	29
BP	GO:0033865	nucleoside bisphosphate metabolic process	17/1464	138/18866	0.0387214	0.788754	0.779356	PDK4/SULT1A2/SULT1A1/ACSS1/ACAT1/PDPR/DCAKD/PANK4/SULT1C4/ACACB/MCCC2/ACOT6/OGDH/FASN/ACSBG2/PDK2/TECR	17
BP	GO:0033875	ribonucleoside bisphosphate metabolic process	17/1464	138/18866	0.0387214	0.788754	0.779356	PDK4/SULT1A2/SULT1A1/ACSS1/ACAT1/PDPR/DCAKD/PANK4/SULT1C4/ACACB/MCCC2/ACOT6/OGDH/FASN/ACSBG2/PDK2/TECR	17
BP	GO:0034032	purine nucleoside bisphosphate metabolic process	17/1464	138/18866	0.0387214	0.788754	0.779356	PDK4/SULT1A2/SULT1A1/ACSS1/ACAT1/PDPR/DCAKD/PANK4/SULT1C4/ACACB/MCCC2/ACOT6/OGDH/FASN/ACSBG2/PDK2/TECR	17
BP	GO:0072329	monocarboxylic acid catabolic process	17/1464	138/18866	0.0387214	0.788754	0.779356	CPT1A/IVD/ECI2/CYP26A1/ACADVL/ACAT1/HOGA1/IDUA/ECI1/ADIPOQ/ACACB/ILVBL/PLIN5/PLA2G15/ECH1/ABCD4/ECHDC2	17
BP	GO:0032755	positive regulation of interleukin-6 production	12/1464	88/18866	0.0389063	0.789052	0.77965	LILRA2/MAPK13/MMP8/NLRP10/IL17D/TIRAP/SIGLEC16/NOD1/TICAM1/IL17A/MAVS/DHX9	12
BP	GO:0051090	regulation of DNA-binding transcription factor activity	46/1464	455/18866	0.0391132	0.789052	0.77965	ADORA3/MAP2K5/LRRC14/DHX33/TRIM27/SHH/TRIM22/CDK5RAP3/USP7/WNT10B/PRKCB/SMAD3/NLRC3/CREBZF/TRIM25/TRIM52/LRP5/CARD11/PPARGC1B/STK36/IKBKB/CACTIN/FLOT1/TRAF5/ARID5B/DAB2IP/EDA2R/TAB1/ARRB2/TIRAP/PARP10/ZNF431/NOD1/TICAM1/EP300/PPRC1/LRRFIP1/MTURN/HDAC5/RPS3/SETD6/MAVS/EIF2AK2/PIDD1/CAPN3/DHX9	46
BP	GO:0045879	negative regulation of smoothened signaling pathway	6/1464	33/18866	0.0391617	0.789052	0.77965	ULK3/GPC3/MEGF8/MGRN1/PRKACA/TULP3	6
BP	GO:0050777	negative regulation of immune response	19/1464	159/18866	0.039464	0.789866	0.780454	BCR/THOC1/VSIG4/IFI16/TRIM27/CLEC4G/NLRC3/AMBP/TTLL12/FCGR2B/PARP3/CACTIN/IFNL1/ARRB2/METTL3/BST2/ADAR/STAT6/CD300A	19
BP	GO:0050854	regulation of antigen receptor-mediated signaling pathway	10/1464	69/18866	0.0394862	0.789866	0.780454	CCR7/PRKCB/FCGR2B/CARD11/SLC39A10/PVRIG/PTPN22/RPS3/CD300A/ELF2	10
BP	GO:0050857	positive regulation of antigen receptor-mediated signaling pathway	5/1464	25/18866	0.0402736	0.797176	0.787677	CCR7/PRKCB/CARD11/SLC39A10/RPS3	5
BP	GO:0031056	regulation of histone modification	18/1464	149/18866	0.0403088	0.797176	0.787677	KAT2A/RTF1/CTBP1/JARID2/OGT/NOS1/SETD5/DNMT3B/GLYR1/AKAP8L/ZNF274/ZNF335/AKAP8/KMT2B/CDK9/UBR5/KMT2A/CHTOP	18
BP	GO:0034614	cellular response to reactive oxygen species	20/1464	170/18866	0.0406334	0.797176	0.787677	ANKZF1/KLF2/MAPK13/SZT2/HGF/PPARGC1B/HSF1/ZNF580/ABL1/TRAP1/MPO/SETX/STK25/AXL/RPS3/FXN/PDE8A/PDK2/STAT6/RNF112	20
BP	GO:0032515	negative regulation of phosphoprotein phosphatase activity	9/1464	60/18866	0.0407677	0.797176	0.787677	URI1/IKBKB/PPP1R35/CABIN1/ARPP19/PHACTR1/CRY2/ROCK2/PPP1R10	9
BP	GO:0043966	histone H3 acetylation	9/1464	60/18866	0.0407677	0.797176	0.787677	KAT2A/BRD1/BRPF3/TAF6L/ING5/MEAF6/SUPT7L/JADE1/KMT2A	9
BP	GO:0071806	protein transmembrane transport	9/1464	60/18866	0.0407677	0.797176	0.787677	C2CD5/BCR/CHCHD4/TOMM40/GRPEL1/SEC61A2/PAM16/TRAM2/TIMM23B	9
BP	GO:0010827	regulation of glucose transmembrane transport	11/1464	79/18866	0.041025	0.797176	0.787677	TERT/C2CD5/PRKCB/GPC3/ADIPOQ/CAPN10/SORBS1/OCLN/KLF15/ARPP19/SIRT6	11
BP	GO:0035304	regulation of protein dephosphorylation	17/1464	139/18866	0.0410592	0.797176	0.787677	TSC1/URI1/SYMPK/SLC39A10/IKBKB/PPP6R2/PPP1R35/CABIN1/ARPP19/PHACTR1/CRY2/DMPK/ROCK2/PPP2R5D/EIF2AK2/CD300A/PPP1R10	17
BP	GO:0031113	regulation of microtubule polymerization	8/1464	51/18866	0.0414546	0.797176	0.787677	GBA2/SLC39A12/NUMA1/ABL1/OCLN/PSRC1/FKBP4/RPS3	8
BP	GO:0046473	phosphatidic acid metabolic process	8/1464	51/18866	0.0414546	0.797176	0.787677	DGKA/DGKQ/LPCAT4/PLA2G6/DGKD/DGKE/ACP6/GPD1L	8
BP	GO:0010950	positive regulation of endopeptidase activity	21/1464	181/18866	0.0416196	0.797176	0.787677	HIP1/IFI16/PPM1F/LGMN/SMAD3/GRAMD4/HSF1/NLRP1/P2RX1/MEFV/CASP10/CIDEB/PML/NOD1/MTCH1/RPS3/ROCK2/MYC/PIDD1/UACA/XDH	21
BP	GO:0034101	erythrocyte homeostasis	16/1464	129/18866	0.0416837	0.797176	0.787677	SOX6/P4HTM/BRD1/KLF2/CDK5RAP3/SLC4A1/RPS17/L3MBTL3/ISG15/KLF13/ANKRD54/AXL/ACIN1/ALAS2/ADAR/ADD1	16
BP	GO:0016051	carbohydrate biosynthetic process	24/1464	213/18866	0.0417152	0.797176	0.787677	PPP1R3E/KAT2A/PTH1R/RBP4/NDST3/DGKQ/MST1/USP7/OGT/CLK2/C1QTNF3/P2RY1/SERPINA12/ADIPOQ/CHST12/SORBS1/PGP/GYG2/ATF4/EP300/NLN/ARPP19/ENO3/PDK2	24
BP	GO:0071706	tumor necrosis factor superfamily cytokine production	15/1464	119/18866	0.0421422	0.798312	0.7888	TRIM27/NLRC3/ADIPOQ/HSF1/CACTIN/ARRB2/TIRAP/NOD1/TICAM1/AKAP8/AXL/PTPN22/ANGPT1/MAVS/CIDEA	15
BP	GO:0033044	regulation of chromosome organization	37/1464	356/18866	0.0422525	0.798312	0.7888	KAT2A/ATF7IP/RTF1/CTBP1/CDC16/MAD1L1/JARID2/USP7/CTC1/OGT/HNRNPA1/SETDB1/HMBOX1/MAP3K4/NOS1/SETD5/NUMA1/NAA40/DNMT3B/DDX11/GLYR1/AKAP8L/PARP10/ZNF274/HNRNPC/ZNF335/PML/AKAP8/KMT2B/CDK9/UBR5/MYC/PPP1R10/KMT2A/CHTOP/PIF1/SIRT6	37
BP	GO:2000278	regulation of DNA biosynthetic process	14/1464	109/18866	0.0423831	0.798312	0.7888	SH2B1/CTC1/HNRNPA1/HMBOX1/MAP3K4/HGF/ADIPOQ/PARP3/CHTF18/ARRB2/HNRNPC/PARP4/MYC/PIF1	14
BP	GO:0009411	response to UV	17/1464	140/18866	0.043497	0.798312	0.7888	OPN5/ACTR5/MAPK13/INO80/UBE4B/MAP3K4/ATF4/UVSSA/ERCC3/PML/ERCC8/EP300/METTL3/STK11/TP53I13/SDF4/MYC	17
BP	GO:0034660	ncRNA metabolic process	49/1464	493/18866	0.0439584	0.798312	0.7888	NSUN5P1/QTRT1/AARS2/NOL9/INTS3/NSUN6/CARS2/VARS2/TSEN54/DDX17/DIS3L/RRS1/NSUN5/DTWD1/ZCCHC8/SMAD3/RPL7L1/TRMT10B/THUMPD2/CDK5RAP1/PWP2/EXOSC6/ELAC2/ISG20L2/AGO4/RPS28/ALKBH1/NOL8/RPS17/XPO5/PDCD11/GTPBP3/NOP2/TRMT1/QRSL1/INTS1/NOLC1/PRORSD1P/MDN1/METTL3/RRP9/USP36/EXOSC7/TSEN2/TRMU/ADAR/SARS2/TSEN34/SRRT	49
BP	GO:0071426	ribonucleoprotein complex export from nucleus	16/1464	130/18866	0.0442543	0.798312	0.7888	SRSF6/TSC1/THOC1/RBM15B/SYMPK/SRSF5/RRS1/NXF1/POLDIP3/PABPN1/UPF2/POM121/U2AF2/AKAP8L/THOC6/CHTOP	16
BP	GO:0032204	regulation of telomere maintenance	11/1464	80/18866	0.0443695	0.798312	0.7888	USP7/CTC1/HNRNPA1/HMBOX1/MAP3K4/HNRNPC/PML/MYC/PPP1R10/PIF1/SIRT6	11
BP	GO:2000300	regulation of synaptic vesicle exocytosis	11/1464	80/18866	0.0443695	0.798312	0.7888	DVL1/NAPB/PRKCB/FBXL20/P2RY1/P2RX1/GIT1/STXBP5L/P2RY4/VAMP1/CACNB2	11
BP	GO:0006403	RNA localization	26/1464	236/18866	0.0444359	0.798312	0.7888	SRSF6/TSC1/THOC1/RBM15B/POM121L12/SYMPK/SRSF5/RRS1/POM121L2/NPIPA1/NXF1/POLDIP3/HNRNPA1/PABPN1/UPF2/HSF1/POM121/FLOT1/UPF3A/U2AF2/XPO5/AKAP8L/THOC6/MX2/CHTOP/DHX9	26
BP	GO:0015865	purine nucleotide transport	6/1464	34/18866	0.0445482	0.798312	0.7888	SLC25A23/SLC25A36/SLC25A45/SLC25A42/SLC25A6/ABCC11	6
BP	GO:0042759	long-chain fatty acid biosynthetic process	6/1464	34/18866	0.0445482	0.798312	0.7888	GSTM2/GSTM4/GSTM1/CYP2C9/CYP2C8/ACSBG2	6
BP	GO:0045807	positive regulation of endocytosis	13/1464	100/18866	0.045356	0.798312	0.7888	ITSN1/HIP1/GPC3/ANKFY1/PPP3CC/FLOT1/ARRB2/PICK1/TBC1D5/DGKD/DLL1/AXL/ANGPT1	13
BP	GO:0010506	regulation of autophagy	36/1464	347/18866	0.0456071	0.798312	0.7888	TBC1D14/TSC1/MFSD8/CALCOCO2/IFI16/TRIM27/WDR6/VPS13C/TRIM22/FOXK1/PRKAB2/MTCL1/HGF/ATP13A2/RAB12/OSBPL7/TPCN1/ABL1/ATP6V0A1/SESN1/RALB/MEFV/POLDIP2/SNRNP70/CPTP/NOD1/TICAM1/KAT5/EP300/SEC22B/STK11/PRKACA/RAB8A/CDC37/USP36/PTPN22	36
BP	GO:0002704	negative regulation of leukocyte mediated immunity	8/1464	52/18866	0.0457953	0.798312	0.7888	BCR/THOC1/CLEC4G/FCGR2B/PARP3/ARRB2/BST2/CD300A	8
BP	GO:0006998	nuclear envelope organization	8/1464	52/18866	0.0457953	0.798312	0.7888	SUN1/NEK9/PRKCB/NDEL1/TMEM43/AKAP8L/TMEM170A/DMPK	8
BP	GO:0051496	positive regulation of stress fiber assembly	8/1464	52/18866	0.0457953	0.798312	0.7888	TSC1/PPM1F/SMAD3/ARHGEF15/TESK1/ABL1/ROCK2/MYOC	8
BP	GO:0031293	membrane protein intracellular domain proteolysis	4/1464	18/18866	0.0459542	0.798312	0.7888	APH1B/NCSTN/APH1A/SPPL2B	4
BP	GO:0061577	calcium ion transmembrane transport via high voltage-gated calcium channel	4/1464	18/18866	0.0459542	0.798312	0.7888	CACNG6/NOS1/NPPA/CACNB2	4
BP	GO:1902074	response to salt	4/1464	18/18866	0.0459542	0.798312	0.7888	MAPK13/HNRNPA1/HSF1/DAXX	4
BP	GO:0006308	DNA catabolic process	7/1464	43/18866	0.0459832	0.798312	0.7888	DFFB/DNASE1/DNASE1L2/HSF1/DFFA/PAM16/CIDEA	7
BP	GO:2000648	positive regulation of stem cell proliferation	7/1464	43/18866	0.0459832	0.798312	0.7888	TERT/FZD3/SHH/DCT/ZNF335/CCNE1/SIRT6	7
BP	GO:0046578	regulation of Ras protein signal transduction	22/1464	194/18866	0.0467094	0.798312	0.7888	BCR/STMN3/ARHGEF18/OGT/ARFGAP1/DENND4B/ABL1/FLOT1/LZTR1/DAB2IP/LRRC59/STK19/RASAL1/PSD4/RGL2/EPOR/RASGRP4/STARD13/ARHGAP17/RAF1/MADD/MYOC	22
BP	GO:0001672	regulation of chromatin assembly or disassembly	5/1464	26/18866	0.0467895	0.798312	0.7888	ATF7IP/SETDB1/NAA40/PARP10/SIRT6	5
BP	GO:0006309	apoptotic DNA fragmentation	5/1464	26/18866	0.0467895	0.798312	0.7888	DFFB/HSF1/DFFA/PAM16/CIDEA	5
BP	GO:0042737	drug catabolic process	5/1464	26/18866	0.0467895	0.798312	0.7888	NOS1/CYP2A6/CYP2C9/CYP2C8/CYP2A7	5
BP	GO:0060343	trabecula formation	5/1464	26/18866	0.0467895	0.798312	0.7888	SLC40A1/RBP4/WNT10B/PPARGC1B/BMP10	5
BP	GO:0071166	ribonucleoprotein complex localization	16/1464	131/18866	0.0469357	0.798312	0.7888	SRSF6/TSC1/THOC1/RBM15B/SYMPK/SRSF5/RRS1/NXF1/POLDIP3/PABPN1/UPF2/POM121/U2AF2/AKAP8L/THOC6/CHTOP	16
BP	GO:0006090	pyruvate metabolic process	18/1464	152/18866	0.0475304	0.798312	0.7888	PDK4/ADPGK/DHTKD1/FOXK1/OGT/PKLR/GLO1/NCOR1/PDPR/ME2/HOGA1/SLC4A1/POM121/OGDH/EP300/ENO3/PDK2/SIRT6	18
BP	GO:0031667	response to nutrient levels	47/1464	473/18866	0.0478341	0.798312	0.7888	PDK4/TSC1/KAT2A/IFI16/FOLR2/KCNB1/FOXK1/CYP26A1/GIPR/OGT/HNRNPA1/PKLR/SETDB1/ACAT1/SZT2/TRIM25/EIF2AK1/ITFG2/EHMT2/MBD1/ADIPOQ/NMUR2/HSF1/ACACB/TNRC6A/GH2/BBS2/DNMT3B/MPO/SESN1/ALDH1A2/RALB/ATF4/TH/ATG14/PICK1/TBC1D5/FOLR1/TSHB/PDK2/WDR59/EIF2AK2/DHODH/MYBBP1A/STK24/NPFF/SIRT6	47
BP	GO:0071158	positive regulation of cell cycle arrest	11/1464	81/18866	0.0478963	0.798312	0.7888	UHRF2/PCBP4/TP73/DAB2IP/PML/MDM4/EP300/PRKACA/PIDD1/MYBBP1A/RNF112	11
BP	GO:0002182	cytoplasmic translational elongation	3/1464	11/18866	0.0480236	0.798312	0.7888	DPH7/DPH5/CPEB2	3
BP	GO:0002604	regulation of dendritic cell antigen processing and presentation	3/1464	11/18866	0.0480236	0.798312	0.7888	CCR7/FCGR2B/NOD1	3
BP	GO:0035721	intraciliary retrograde transport	3/1464	11/18866	0.0480236	0.798312	0.7888	WDR19/TTC21A/IFT140	3
BP	GO:0040015	negative regulation of multicellular organism growth	3/1464	11/18866	0.0480236	0.798312	0.7888	LGMN/BBS2/FXN	3
BP	GO:0046501	protoporphyrinogen IX metabolic process	3/1464	11/18866	0.0480236	0.798312	0.7888	PPOX/EIF2AK1/ALAS2	3
BP	GO:0061299	retina vasculature morphogenesis in camera-type eye	3/1464	11/18866	0.0480236	0.798312	0.7888	LRP5L/ARHGEF15/LRP5	3
BP	GO:0070475	rRNA base methylation	3/1464	11/18866	0.0480236	0.798312	0.7888	NSUN5P1/NSUN5/NOP2	3
BP	GO:0072697	protein localization to cell cortex	3/1464	11/18866	0.0480236	0.798312	0.7888	EPB41/SAPCD2/NUMA1	3
BP	GO:0097048	dendritic cell apoptotic process	3/1464	11/18866	0.0480236	0.798312	0.7888	CCR7/AXL/CXCL12	3
BP	GO:0098883	synapse pruning	3/1464	11/18866	0.0480236	0.798312	0.7888	C1QC/C1QB/C1QA	3
BP	GO:1900247	regulation of cytoplasmic translational elongation	3/1464	11/18866	0.0480236	0.798312	0.7888	DPH7/DPH5/CPEB2	3
BP	GO:2000668	regulation of dendritic cell apoptotic process	3/1464	11/18866	0.0480236	0.798312	0.7888	CCR7/AXL/CXCL12	3
BP	GO:0098656	anion transmembrane transport	33/1464	315/18866	0.0480801	0.798312	0.7888	SLC7A8/CPT1A/SLC25A20/SLC38A5/SLC7A6/FOLR2/PRKAB2/SLC38A1/MFSD10/THRSP/ABCC1/SLC12A9/SLC25A42/SLC46A1/NMUR2/ACACB/SLC6A18/SLC43A1/SLC4A1/LRRC8E/BEST4/SLC5A5/ATP1A2/SLC12A4/EMB/ANO8/SLC38A7/FOLR1/BEST1/SLC9A8/ANO2/ABCD4/SLC7A4	33
BP	GO:0006790	sulfur compound metabolic process	38/1464	371/18866	0.0480911	0.798312	0.7888	PDK4/CSAD/NFS1/B4GALT3/NDST3/SULT1A2/GSTM2/SULT1A1/ACSS1/GLO1/ST3GAL3/ACAT1/MMACHC/MAT2A/PDPR/B3GALT6/SULT1C4/B4GALT2/GSTM4/IDUA/GSTM1/ACACB/CHST12/OPLAH/MMS19/MPST/MCCC2/MCCC1/BCAN/ACOT6/OGDH/FASN/ACSBG2/FXN/ANGPT1/PDK2/NCAN/TECR	38
BP	GO:0044773	mitotic DNA damage checkpoint	13/1464	101/18866	0.0485184	0.800623	0.791083	PCBP4/CDK5RAP3/RAD9A/GIGYF2/EME2/MDC1/PML/MDM4/TICRR/EP300/PPP1R10/PIDD1/FBXO31	13
BP	GO:0072073	kidney epithelium development	17/1464	142/18866	0.0486799	0.800623	0.791083	LAMA5/SHH/SMAD3/LZTS2/ACAT1/GPC3/ADIPOQ/PTPRO/PGF/GDNF/KLF15/RET/DLL1/HOXA11/MYC/CXCR2/GDF11	17
BP	GO:0030888	regulation of B cell proliferation	9/1464	62/18866	0.0488062	0.800623	0.791083	FCGR2B/CARD11/SLC39A10/MZB1/CD38/TIRAP/TICAM1/CD320/CD300A	9
BP	GO:0140115	export across plasma membrane	9/1464	62/18866	0.0488062	0.800623	0.791083	ABCC5/SLC40A1/ABCC1/RALBP1/SLC35G1/ATP1A2/KCNIP2/NPPA/ATP1B2	9
BP	GO:0006282	regulation of DNA repair	16/1464	132/18866	0.0497297	0.810988	0.801324	RAD52/WRNIP1/HSF1/PARP3/DDX11/SPIDR/UIMC1/MMS19/PML/ERCC8/FUS/RPS3/CDK9/UBR5/SIRT6/DHX9	16
BP	GO:0018022	peptidyl-lysine methylation	16/1464	132/18866	0.0497297	0.810988	0.801324	EZH1/RTF1/JARID2/OGT/SETDB1/CXXC1/TTLL12/EHMT2/SETD5/DNMT3B/ZNF274/ZNF335/KMT2D/KMT2B/SETD6/KMT2A	16
BP	GO:0006471	protein ADP-ribosylation	6/1464	35/18866	0.0503744	0.815124	0.805411	PARP6/PARP3/PARP8/PARP10/PARP4/SIRT6	6
BP	GO:0048821	erythrocyte development	6/1464	35/18866	0.0503744	0.815124	0.805411	SOX6/BRD1/KLF2/SLC4A1/L3MBTL3/ALAS2	6
BP	GO:0018023	peptidyl-lysine trimethylation	8/1464	53/18866	0.050423	0.815124	0.805411	RTF1/OGT/SETD5/ZNF274/ZNF335/KMT2D/KMT2B/KMT2A	8
BP	GO:0006195	purine nucleotide catabolic process	7/1464	44/18866	0.0511717	0.822444	0.812644	NUDT3/ACAT1/PDE2A/PDE8A/PDE5A/PDE7A/XDH	7
BP	GO:1902667	regulation of axon guidance	7/1464	44/18866	0.0511717	0.822444	0.812644	YTHDF1/SEMA3G/PTPRO/ZSWIM8/MEGF8/SEMA3B/CXCL12	7
BP	GO:1903313	positive regulation of mRNA metabolic process	11/1464	82/18866	0.0516085	0.827075	0.817219	YTHDF1/GIGYF2/HSF1/DND1/TNRC6A/SNRNP70/ZFP36L2/METTL3/PLEKHN1/ROCK2/DAZAP1	11
BP	GO:0006997	nucleus organization	16/1464	133/18866	0.0526383	0.841154	0.831131	SUN1/NEK9/PRKCB/NDEL1/PITPNB/NUMA1/WDR73/TMEM43/AKAP8L/PML/NOLC1/SF1/USP36/TMEM170A/DMPK/SRPK1	16
BP	GO:0006399	tRNA metabolic process	21/1464	186/18866	0.0530725	0.845663	0.835586	QTRT1/AARS2/NSUN6/CARS2/VARS2/TSEN54/DTWD1/TRMT10B/THUMPD2/CDK5RAP1/ELAC2/ALKBH1/GTPBP3/TRMT1/QRSL1/PRORSD1P/EXOSC7/TSEN2/TRMU/SARS2/TSEN34	21
BP	GO:0045088	regulation of innate immune response	32/1464	307/18866	0.0538768	0.8529	0.842737	CD209/RNF135/COCH/LILRA2/VSIG4/ZCCHC3/IFI16/NLRC3/TTLL12/FCGR2B/CLEC10A/CARD11/IKBKB/PIK3R6/CACTIN/ICAM2/SLAMF6/TAB1/ARRB2/TIRAP/IRF7/EP300/METTL3/PRKACA/CDC37/PTPN22/ZBP1/ADAR/MAVS/POLR3D/RAF1/DHX9	32
BP	GO:0034389	lipid droplet organization	5/1464	27/18866	0.0538938	0.8529	0.842737	CIDEC/PNPLA2/PLIN5/FITM1/CIDEA	5
BP	GO:0006406	mRNA export from nucleus	14/1464	113/18866	0.0546279	0.8529	0.842737	SRSF6/THOC1/RBM15B/SYMPK/SRSF5/NXF1/POLDIP3/PABPN1/UPF2/POM121/U2AF2/AKAP8L/THOC6/CHTOP	14
BP	GO:0071427	mRNA-containing ribonucleoprotein complex export from nucleus	14/1464	113/18866	0.0546279	0.8529	0.842737	SRSF6/THOC1/RBM15B/SYMPK/SRSF5/NXF1/POLDIP3/PABPN1/UPF2/POM121/U2AF2/AKAP8L/THOC6/CHTOP	14
BP	GO:0030050	vesicle transport along actin filament	4/1464	19/18866	0.0547537	0.8529	0.842737	MYO19/MYO5C/MYO1G/MYO7B	4
BP	GO:0030150	protein import into mitochondrial matrix	4/1464	19/18866	0.0547537	0.8529	0.842737	TOMM40/GRPEL1/PAM16/TIMM23B	4
BP	GO:0031445	regulation of heterochromatin assembly	4/1464	19/18866	0.0547537	0.8529	0.842737	ATF7IP/SETDB1/NAA40/SIRT6	4
BP	GO:0033189	response to vitamin A	4/1464	19/18866	0.0547537	0.8529	0.842737	CYP26A1/DNMT3B/ALDH1A2/TSHB	4
BP	GO:0006376	mRNA splice site selection	8/1464	54/18866	0.0553423	0.85746	0.847243	SRSF6/SRSF5/CELF6/LUC7L3/SETX/SF1/LUC7L/PRPF39	8
BP	GO:0071277	cellular response to calcium ion	11/1464	83/18866	0.0555093	0.85746	0.847243	SYT15/SLC25A23/RASGRP2/LGMN/CPNE1/NCSTN/MCOLN1/RASAL1/FUS/CAPN3/ADD1	11
BP	GO:0032088	negative regulation of NF-kappaB transcription factor activity	12/1464	93/18866	0.0556262	0.85746	0.847243	ADORA3/MAP2K5/LRRC14/CDK5RAP3/USP7/NLRC3/CACTIN/DAB2IP/ARRB2/PARP10/MTURN/SETD6	12
BP	GO:0043280	positive regulation of cysteine-type endopeptidase activity involved in apoptotic process	16/1464	134/18866	0.0556632	0.85746	0.847243	HIP1/PPM1F/SMAD3/GRAMD4/HSF1/NLRP1/P2RX1/CASP10/PML/NOD1/MTCH1/RPS3/MYC/PIDD1/UACA/XDH	16
BP	GO:0035967	cellular response to topologically incorrect protein	19/1464	166/18866	0.0567108	0.86401	0.853714	ANKZF1/CDK5RAP3/ACADVL/CXXC1/BAG6/ARFGAP1/HSF1/DDX11/DAB2IP/HSPA6/ATF4/CUL7/TLN1/EP300/TATDN2/DAXX/EIF2AK2/CREB3L2/ADD1	19
BP	GO:0032365	intracellular lipid transport	7/1464	45/18866	0.0567144	0.86401	0.853714	OSBPL2/CPT1A/SLC25A20/PRKAB2/THRSP/ACACB/ABCD4	7
BP	GO:0042771	intrinsic apoptotic signaling pathway in response to DNA damage by p53 class mediator	7/1464	45/18866	0.0567144	0.86401	0.853714	IFI16/TP73/BAG6/SHISA5/PML/EP300/AEN	7
BP	GO:0043114	regulation of vascular permeability	7/1464	45/18866	0.0567144	0.86401	0.853714	BCR/PDE2A/TJP3/OCLN/ANGPT1/MYLK3/CXCR2	7
BP	GO:0031929	TOR signaling	15/1464	124/18866	0.0569284	0.86401	0.853714	TSC1/MFSD8/TELO2/DGKQ/UBR2/RICTOR/SIK3/SZT2/ITFG2/CARD11/SESN1/PRR5/STK11/WDR59/TTI1	15
BP	GO:0009062	fatty acid catabolic process	14/1464	114/18866	0.0580317	0.86401	0.853714	CPT1A/IVD/ECI2/ACADVL/ACAT1/ECI1/ADIPOQ/ACACB/ILVBL/PLIN5/PLA2G15/ECH1/ABCD4/ECHDC2	14
BP	GO:0015748	organophosphate ester transport	16/1464	135/18866	0.0588061	0.86401	0.853714	OSBPL2/SLC25A23/SLC25A36/XKR8/SLC25A45/PLTP/OSBPL10/ABCC1/SLC25A42/XKR6/ATP8B1/PITPNB/SLC4A1/SLC25A6/CPTP/ABCC11	16
BP	GO:0010038	response to metal ion	37/1464	366/18866	0.0591143	0.86401	0.853714	TERT/ENTPD6/SLC40A1/C1QA/SYT15/SLC25A23/HVCN1/TXNIP/SHH/RASGRP2/LGMN/CPNE1/GIPR/FGB/PKLR/D2HGDH/ATP13A2/NCSTN/CUTA/ATP7B/HSF1/MCOLN1/FABP4/ATF4/TH/RASAL1/KCNIP2/DAXX/FUS/TSHB/COX1/CACNA1H/FXN/KCNA1/MTF1/CAPN3/ADD1	37
BP	GO:0006305	DNA alkylation	10/1464	74/18866	0.0591316	0.86401	0.853714	ATF7IP/EHMT2/MBD1/DNMT3B/PICK1/GATAD2A/PRDM14/MYC/KMT2A/BAZ2A	10
BP	GO:0006306	DNA methylation	10/1464	74/18866	0.0591316	0.86401	0.853714	ATF7IP/EHMT2/MBD1/DNMT3B/PICK1/GATAD2A/PRDM14/MYC/KMT2A/BAZ2A	10
BP	GO:0051865	protein autoubiquitination	10/1464	74/18866	0.0591316	0.86401	0.853714	UBE3A/UHRF2/UBE4B/TRIM52/TRIM17/RNF146/ERCC8/NFX1/MTA1/RNF112	10
BP	GO:0048864	stem cell development	11/1464	84/18866	0.0596014	0.86401	0.853714	LAMA5/SHH/SEMA3G/GDNF/TAPT1/ALDH1A2/RET/SEMA3B/MSI2/NOLC1/FOLR1	11
BP	GO:0140029	exocytic process	11/1464	84/18866	0.0596014	0.86401	0.853714	KCNB1/NAPB/SCRIB/RAB12/P2RX1/RALB/RAB3D/NPPA/RAB8A/RAB3C/VAMP1	11
BP	GO:0006979	response to oxidative stress	45/1464	458/18866	0.060216	0.86401	0.853714	TSC1/UBE3A/ANKZF1/KLF2/CCR7/TXNIP/HBB/RAD52/MAPK13/NOX1/GPX3/SZT2/HGF/ATP13A2/PPARGC1B/ADIPOQ/HSF1/ZNF580/ABL1/PDLIM1/SGK2/TRAP1/APOD/MPO/SETX/SESN1/CD38/ATF4/STK25/ERCC3/PML/ERCC8/NDUFS2/AXL/DUOX2/COX1/RPS3/FXN/PDE8A/PDK2/STAT6/MTF1/CPEB2/STK24/RNF112	45
BP	GO:0034620	cellular response to unfolded protein	17/1464	146/18866	0.0603237	0.86401	0.853714	CDK5RAP3/ACADVL/CXXC1/ARFGAP1/HSF1/DDX11/DAB2IP/HSPA6/ATF4/CUL7/TLN1/EP300/TATDN2/DAXX/EIF2AK2/CREB3L2/ADD1	17
BP	GO:0002468	dendritic cell antigen processing and presentation	3/1464	12/18866	0.0604387	0.86401	0.853714	CCR7/FCGR2B/NOD1	3
BP	GO:0002713	negative regulation of B cell mediated immunity	3/1464	12/18866	0.0604387	0.86401	0.853714	THOC1/FCGR2B/PARP3	3
BP	GO:0002730	regulation of dendritic cell cytokine production	3/1464	12/18866	0.0604387	0.86401	0.853714	TICAM1/BST2/MAVS	3
BP	GO:0002890	negative regulation of immunoglobulin mediated immune response	3/1464	12/18866	0.0604387	0.86401	0.853714	THOC1/FCGR2B/PARP3	3
BP	GO:0030208	dermatan sulfate biosynthetic process	3/1464	12/18866	0.0604387	0.86401	0.853714	CHST12/BCAN/NCAN	3
BP	GO:0042178	xenobiotic catabolic process	3/1464	12/18866	0.0604387	0.86401	0.853714	GSTM2/GSTM4/GSTM1	3
BP	GO:0043301	negative regulation of leukocyte degranulation	3/1464	12/18866	0.0604387	0.86401	0.853714	BCR/FCGR2B/CD300A	3
BP	GO:0046322	negative regulation of fatty acid oxidation	3/1464	12/18866	0.0604387	0.86401	0.853714	ACADVL/ACACB/PLIN5	3
BP	GO:0070269	pyroptosis	3/1464	12/18866	0.0604387	0.86401	0.853714	GSDMC/ZBP1/DHX9	3
BP	GO:0071340	skeletal muscle acetylcholine-gated channel clustering	3/1464	12/18866	0.0604387	0.86401	0.853714	DNAJA3/DVL1/LRP4	3
BP	GO:0071472	cellular response to salt stress	3/1464	12/18866	0.0604387	0.86401	0.853714	SLC25A23/EFHD1/CAPN3	3
BP	GO:0090520	sphingolipid mediated signaling pathway	3/1464	12/18866	0.0604387	0.86401	0.853714	S1PR5/SPNS2/S1PR4	3
BP	GO:1903441	protein localization to ciliary membrane	3/1464	12/18866	0.0604387	0.86401	0.853714	WDR19/BBIP1/GGA1	3
BP	GO:1903900	regulation of viral life cycle	18/1464	157/18866	0.0615337	0.874356	0.863938	OAS1/OAS2/IFI16/TRIM27/TRIM22/SETDB1/TRIM25/ISG15/PARP10/RSAD2/PML/BST2/OASL/CCL8/ADAR/MAVS/EIF2AK2/SRPK1	18
BP	GO:0015867	ATP transport	5/1464	28/18866	0.0615877	0.874356	0.863938	SLC25A23/SLC25A36/SLC25A45/SLC25A42/SLC25A6	5
BP	GO:0043393	regulation of protein binding	23/1464	211/18866	0.0616342	0.874356	0.863938	TERT/DVL1/HOXA3/SYMPK/EPB41/ITGA4/CAPRIN2/ADIPOQ/HSF1/DDX11/ABL1/FLOT1/RALB/ARRB2/MFNG/TICAM1/EP300/STK4/PRKACA/HDAC5/TTBK2/ANGPT1/ADD1	23
BP	GO:0009451	RNA modification	19/1464	168/18866	0.06248	0.876248	0.865807	NSUN5P1/QTRT1/RBM15B/AARS2/NSUN6/NSUN5/RNMT/DTWD1/TRMT10B/THUMPD2/CDK5RAP1/ALKBH1/GTPBP3/NOP2/TRMT1/METTL3/TRMU/ADAR/CMTR1	19
BP	GO:0031098	stress-activated protein kinase signaling cascade	31/1464	300/18866	0.0625281	0.876248	0.865807	CCR7/SH2D3A/FGD2/MAPK13/NOX1/MAP3K4/HGF/NCOR1/AMBP/FCGR2B/MMP8/IKBKB/CCDC88C/TRAF5/DAB2IP/EDA2R/TAB1/STK25/TIRAP/TNFRSF19/NPPA/NOD1/DAXX/STK4/MTURN/PTPN22/RELL2/RPS3/EIF2AK2/MYC/XDH	31
BP	GO:0043330	response to exogenous dsRNA	7/1464	46/18866	0.0626147	0.876248	0.865807	ZCCHC3/FLOT1/RALB/TICAM1/IFNA4/MAVS/DHX9	7
BP	GO:0048538	thymus development	7/1464	46/18866	0.0626147	0.876248	0.865807	HOXA3/MAD1L1/SHH/JARID2/CTC1/ABL1/RAF1	7
BP	GO:0035308	negative regulation of protein dephosphorylation	9/1464	65/18866	0.062713	0.876248	0.865807	URI1/IKBKB/PPP1R35/CABIN1/ARPP19/PHACTR1/CRY2/ROCK2/PPP1R10	9
BP	GO:0048278	vesicle docking	9/1464	65/18866	0.062713	0.876248	0.865807	KCNB1/STX16/STX17/RAB12/RALB/RAB3D/TSNARE1/RAB8A/RAB3C	9
BP	GO:0051592	response to calcium ion	17/1464	147/18866	0.0635099	0.87768	0.867221	ENTPD6/SYT15/SLC25A23/TXNIP/RASGRP2/LGMN/CPNE1/GIPR/FGB/NCSTN/MCOLN1/RASAL1/KCNIP2/FUS/TSHB/CAPN3/ADD1	17
BP	GO:0032602	chemokine production	10/1464	75/18866	0.0637071	0.87768	0.867221	MAP2K5/C1QTNF3/ADIPOQ/DEFB124/APOD/MEFV/TIRAP/IL17A/MAVS/EIF2AK2	10
BP	GO:0010507	negative regulation of autophagy	11/1464	85/18866	0.0638871	0.87768	0.867221	TBC1D14/TSC1/WDR6/FOXK1/HGF/POLDIP2/SNRNP70/CPTP/SEC22B/USP36/PTPN22	11
BP	GO:0010952	positive regulation of peptidase activity	22/1464	201/18866	0.0640792	0.87768	0.867221	HIP1/IFI16/MAPK12/PPM1F/LGMN/SMAD3/GRAMD4/HSF1/NLRP1/P2RX1/MEFV/CASP10/CIDEB/PML/NOD1/MTCH1/RPS3/ROCK2/MYC/PIDD1/UACA/XDH	22
BP	GO:0002577	regulation of antigen processing and presentation	4/1464	20/18866	0.0643937	0.87768	0.867221	CCR7/YTHDF1/FCGR2B/NOD1	4
BP	GO:0006450	regulation of translational fidelity	4/1464	20/18866	0.0643937	0.87768	0.867221	AARS2/VARS2/CDK5RAP1/PRORSD1P	4
BP	GO:0010042	response to manganese ion	4/1464	20/18866	0.0643937	0.87768	0.867221	D2HGDH/ATP13A2/ATF4/TH	4
BP	GO:0019373	epoxygenase P450 pathway	4/1464	20/18866	0.0643937	0.87768	0.867221	CYP2A6/CYP2C9/CYP2C8/CYP2A7	4
BP	GO:0032211	negative regulation of telomere maintenance via telomerase	4/1464	20/18866	0.0643937	0.87768	0.867221	CTC1/HNRNPA1/HNRNPC/PIF1	4
BP	GO:0043555	regulation of translation in response to stress	4/1464	20/18866	0.0643937	0.87768	0.867221	RBM4/EIF2AK1/ATF4/EIF2AK2	4
BP	GO:0030168	platelet activation	18/1464	158/18866	0.0646424	0.878915	0.868442	DGKA/HBB/DGKQ/FGB/PRKCB/HRG/TREML1/P2RY1/MPL/PIK3R6/P2RX1/ARRB2/PIK3R5/DGKD/TLN1/AXL/DGKE/RAF1	18
BP	GO:0043113	receptor clustering	8/1464	56/18866	0.0660693	0.879211	0.868735	DNAJA3/DVL1/WDR19/ITGA4/SCRIB/PICK1/LRP4/SHISA6	8
BP	GO:0090305	nucleic acid phosphodiester bond hydrolysis	32/1464	313/18866	0.0664309	0.879211	0.868735	RNASE1/C11orf80/DFFB/PAN2/NOL9/DIS3L/EDC4/RRS1/PCF11/DXO/RAD9A/EME2/DNASE1/DNASE1L2/EXOSC6/POLG/FAN1/HSF1/ELAC2/ISG20L2/DFFA/DCLRE1C/RNASE2/CHD1L/ERCC3/TATDN2/EXOSC7/AEN/TSEN2/TSEN34/PAM16/CIDEA	32
BP	GO:0030038	contractile actin filament bundle assembly	13/1464	106/18866	0.0666092	0.879211	0.868735	TSC1/PPM1F/ARHGEF18/SMAD3/PPP1R9A/ARHGEF15/TESK1/ABL1/PDLIM1/SORBS1/PHACTR1/ROCK2/MYOC	13
BP	GO:0043149	stress fiber assembly	13/1464	106/18866	0.0666092	0.879211	0.868735	TSC1/PPM1F/ARHGEF18/SMAD3/PPP1R9A/ARHGEF15/TESK1/ABL1/PDLIM1/SORBS1/PHACTR1/ROCK2/MYOC	13
BP	GO:0046928	regulation of neurotransmitter secretion	13/1464	106/18866	0.0666092	0.879211	0.868735	DVL1/NAPB/PRKCB/PPP1R9A/FBXL20/ASIC1/P2RY1/P2RX1/GIT1/STXBP5L/P2RY4/VAMP1/CACNB2	13
BP	GO:0072330	monocarboxylic acid biosynthetic process	26/1464	246/18866	0.0667439	0.879211	0.868735	OSBPL2/PDK4/GSTM2/PRKAB2/ACADVL/ACSS1/PKLR/HOGA1/GSTM4/ADIPOQ/GSTM1/ACACB/MGLL/OSBPL7/CHST12/ALDH1A2/CYP2C9/CYP2C8/ACMSD/BCAN/SCAP/FASN/ACSBG2/CYP8B1/NCAN/TECR	26
BP	GO:0008277	regulation of G protein-coupled receptor signaling pathway	17/1464	148/18866	0.0668088	0.879211	0.868735	GUCA1C/GRK6/DGKQ/GNG7/GIPR/NOS1/MGLL/MRAP/ARRB2/GRK1/MGRN1/GIT1/RASGRP4/ZDHHC7/GIT2/ROCK2/TULP3	17
BP	GO:0001505	regulation of neurotransmitter levels	25/1464	235/18866	0.0669352	0.879211	0.868735	SLC29A2/DVL1/NAPB/PRKCB/SCRIB/NOS1/SLC38A1/PPP1R9A/FBXL20/ASIC1/P2RY1/FLOT1/GDNF/P2RX1/TH/ATP1A2/GRM4/SYN3/GIT1/STXBP5L/P2RY4/DNAJC5/VAMP1/HRH3/CACNB2	25
BP	GO:0031503	protein-containing complex localization	30/1464	291/18866	0.0676003	0.879211	0.868735	SRSF6/TSC1/HIP1/THOC1/RBM15B/WDR19/SYMPK/SRSF5/TTC21A/RRS1/NXF1/POLDIP3/SCRIB/PABPN1/UPF2/KIF5A/KLHL21/POM121/RALB/U2AF2/AKAP8L/NUMB/IFT140/THOC6/RAB8A/MX2/FKBP4/SHISA6/AP3D1/CHTOP	30
BP	GO:0032675	regulation of interleukin-6 production	18/1464	159/18866	0.0678567	0.879211	0.868735	LILRA2/KLF2/MAPK13/NLRC3/HGF/C1QTNF3/MMP8/ARRB2/NLRP10/IL17D/TIRAP/SIGLEC16/NOD1/TICAM1/IL17A/PTPN22/MAVS/DHX9	18
BP	GO:0045445	myoblast differentiation	11/1464	86/18866	0.0683684	0.879211	0.868735	SHH/MAPK12/DDX17/WNT10B/PRICKLE1/CMTM5/PITX1/DLL1/HIF1AN/MAML1/CAPN3	11
BP	GO:0032874	positive regulation of stress-activated MAPK cascade	19/1464	170/18866	0.0686415	0.879211	0.868735	CCR7/FGD2/NOX1/MAP3K4/FCGR2B/MMP8/TRAF5/DAB2IP/EDA2R/STK25/TIRAP/TNFRSF19/NOD1/DAXX/MTURN/RELL2/RPS3/EIF2AK2/XDH	19
BP	GO:0042572	retinol metabolic process	7/1464	47/18866	0.0688748	0.879211	0.868735	ADH1B/RBP4/PNPLA2/ALDH1A2/CYP2C8/RETSAT/RDH13	7
BP	GO:0120163	negative regulation of cold-induced thermogenesis	7/1464	47/18866	0.0688748	0.879211	0.868735	WNT10B/NOVA2/ADIPOQ/IP6K1/ATF4/STK11/CIDEA	7
BP	GO:0006638	neutral lipid metabolic process	16/1464	138/18866	0.0689576	0.879211	0.868735	CPT1A/DGKA/DGKQ/PNPLA1/THRSP/AVIL/SERPINA12/MGLL/FABP4/PNPLA2/ATG14/PLIN5/DGKD/DGKE/PLA2G15/LMF1	16
BP	GO:0006639	acylglycerol metabolic process	16/1464	138/18866	0.0689576	0.879211	0.868735	CPT1A/DGKA/DGKQ/PNPLA1/THRSP/AVIL/SERPINA12/MGLL/FABP4/PNPLA2/ATG14/PLIN5/DGKD/DGKE/PLA2G15/LMF1	16
BP	GO:0043153	entrainment of circadian clock by photoperiod	5/1464	29/18866	0.0698687	0.879211	0.868735	RBM4/OPN5/PML/MTA1/CRY2	5
BP	GO:0051569	regulation of histone H3-K4 methylation	5/1464	29/18866	0.0698687	0.879211	0.868735	RTF1/DNMT3B/ZNF335/KMT2B/KMT2A	5
BP	GO:0055075	potassium ion homeostasis	5/1464	29/18866	0.0698687	0.879211	0.868735	SLC12A9/KCNJ2/ATP1A2/SLC12A4/ATP1B2	5
BP	GO:0061615	glycolytic process through fructose-6-phosphate	5/1464	29/18866	0.0698687	0.879211	0.868735	ADPGK/FOXK1/PKLR/SLC4A1/ENO3	5
BP	GO:0044282	small molecule catabolic process	44/1464	452/18866	0.0703287	0.879211	0.868735	NUDT3/INPP5E/ENTPD6/GALT/CSAD/CPT1A/IVD/ECI2/SULT1A2/PPM1K/ADPGK/FOXK1/ADHFE1/SULT1A1/CYP26A1/ACADVL/PKLR/CARNS1/ACAT1/NOS1/LRP5/HOGA1/SULT1C4/IDUA/ECI1/ADIPOQ/ACACB/ILVBL/DBT/MPST/BDH1/BCAT2/ACMSD/PLIN5/MCCC2/MCCC1/OGDH/AMT/PLA2G15/ENO3/ECH1/ABCD4/ECHDC2/PHYKPL	44
BP	GO:0006862	nucleotide transport	6/1464	38/18866	0.0705306	0.879211	0.868735	SLC25A23/SLC25A36/SLC25A45/SLC25A42/SLC25A6/ABCC11	6
BP	GO:0044003	modulation by symbiont of host process	6/1464	38/18866	0.0705306	0.879211	0.868735	CD209/SCRIB/PABPN1/CLEC4M/KPNA5/EIF2AK2	6
BP	GO:0045880	positive regulation of smoothened signaling pathway	6/1464	38/18866	0.0705306	0.879211	0.868735	SHH/ULK3/GPC3/STK36/GLI1/SCUBE3	6
BP	GO:0051567	histone H3-K9 methylation	6/1464	38/18866	0.0705306	0.879211	0.868735	JARID2/SETDB1/EHMT2/SETD5/DNMT3B/ZNF274	6
BP	GO:1900026	positive regulation of substrate adhesion-dependent cell spreading	6/1464	38/18866	0.0705306	0.879211	0.868735	FGB/LIMS2/RREB1/ABL1/TRIOBP/MYOC	6
BP	GO:0045017	glycerolipid biosynthetic process	28/1464	270/18866	0.0711175	0.879211	0.868735	INPP5E/CHKA/PIGG/DGKA/DGKQ/PIGL/CPNE1/CHKB/THRSP/AVIL/PIGS/PIK3R6/CSNK2B/PNPLA2/PIK3R5/LPCAT4/PLA2G6/PCYT2/ETNK2/PLIN5/PCYT1A/DGKD/PIGB/DGKE/PLA2G15/ACP6/SBF1/GPD1L	28
BP	GO:0140056	organelle localization by membrane tethering	19/1464	171/18866	0.0718719	0.879211	0.868735	CEP192/KCNB1/STX16/PACS2/CEP70/STX17/RAB12/RALB/NPHP4/RAB3D/ATG14/HAUS5/TSNARE1/PRKACA/RAB8A/RAB3C/TTBK2/SFI1/ODF2	19
BP	GO:0002090	regulation of receptor internalization	8/1464	57/18866	0.0718817	0.879211	0.868735	ANKRD13B/SCRIB/FLOT1/ARRB2/PICK1/NUMB/TBC1D5/ANGPT1	8
BP	GO:0051568	histone H3-K4 methylation	8/1464	57/18866	0.0718817	0.879211	0.868735	RTF1/OGT/CXXC1/DNMT3B/ZNF335/KMT2D/KMT2B/KMT2A	8
BP	GO:0032872	regulation of stress-activated MAPK cascade	25/1464	237/18866	0.0723393	0.879211	0.868735	CCR7/FGD2/NOX1/MAP3K4/HGF/NCOR1/AMBP/FCGR2B/MMP8/TRAF5/DAB2IP/EDA2R/STK25/TIRAP/TNFRSF19/NPPA/NOD1/DAXX/MTURN/PTPN22/RELL2/RPS3/EIF2AK2/MYC/XDH	25
BP	GO:0031060	regulation of histone methylation	9/1464	67/18866	0.0732521	0.879211	0.868735	RTF1/JARID2/OGT/DNMT3B/ZNF274/ZNF335/KMT2B/KMT2A/CHTOP	9
BP	GO:0036498	IRE1-mediated unfolded protein response	9/1464	67/18866	0.0732521	0.879211	0.868735	ACADVL/CXXC1/ARFGAP1/DDX11/DAB2IP/CUL7/TLN1/TATDN2/ADD1	9
BP	GO:0050918	positive chemotaxis	9/1464	67/18866	0.0732521	0.879211	0.868735	SMAD3/SCRIB/HGF/ALKBH1/PGF/GDNF/CCL16/ANGPT1/CXCL12	9
BP	GO:0046785	microtubule polymerization	10/1464	77/18866	0.0735247	0.879211	0.868735	GBA2/SLC39A12/CEP192/NDEL1/NUMA1/ABL1/OCLN/PSRC1/FKBP4/RPS3	10
BP	GO:0002371	dendritic cell cytokine production	3/1464	13/18866	0.0741824	0.879211	0.868735	TICAM1/BST2/MAVS	3
BP	GO:0002638	negative regulation of immunoglobulin production	3/1464	13/18866	0.0741824	0.879211	0.868735	THOC1/FCGR2B/PARP3	3
BP	GO:0006068	ethanol catabolic process	3/1464	13/18866	0.0741824	0.879211	0.868735	SULT1A2/SULT1A1/SULT1C4	3
BP	GO:0015801	aromatic amino acid transport	3/1464	13/18866	0.0741824	0.879211	0.868735	SLC7A8/SLC38A5/SLC38A7	3
BP	GO:0018202	peptidyl-histidine modification	3/1464	13/18866	0.0741824	0.879211	0.868735	DPH7/DPH5/HIF1AN	3
BP	GO:0031053	primary miRNA processing	3/1464	13/18866	0.0741824	0.879211	0.868735	SMAD3/METTL3/SRRT	3
BP	GO:0031453	positive regulation of heterochromatin assembly	3/1464	13/18866	0.0741824	0.879211	0.868735	ATF7IP/SETDB1/SIRT6	3
BP	GO:0033127	regulation of histone phosphorylation	3/1464	13/18866	0.0741824	0.879211	0.868735	AKAP8L/AKAP8/CDK9	3
BP	GO:0033605	positive regulation of catecholamine secretion	3/1464	13/18866	0.0741824	0.879211	0.868735	KCNB1/GDNF/CXCL12	3
BP	GO:0042635	positive regulation of hair cycle	3/1464	13/18866	0.0741824	0.879211	0.868735	TERT/WNT10B/NUMA1	3
BP	GO:0048548	regulation of pinocytosis	3/1464	13/18866	0.0741824	0.879211	0.868735	PROM2/ANKFY1/AXL	3
BP	GO:0060340	positive regulation of type I interferon-mediated signaling pathway	3/1464	13/18866	0.0741824	0.879211	0.868735	IRF7/ZBP1/MAVS	3
BP	GO:0071027	nuclear RNA surveillance	3/1464	13/18866	0.0741824	0.879211	0.868735	DXO/EXOSC6/EXOSC7	3
BP	GO:0071028	nuclear mRNA surveillance	3/1464	13/18866	0.0741824	0.879211	0.868735	DXO/EXOSC6/EXOSC7	3
BP	GO:0071287	cellular response to manganese ion	3/1464	13/18866	0.0741824	0.879211	0.868735	ATP13A2/ATF4/TH	3
BP	GO:0071872	cellular response to epinephrine stimulus	3/1464	13/18866	0.0741824	0.879211	0.868735	PKLR/ADIPOQ/PRKACA	3
BP	GO:0090646	mitochondrial tRNA processing	3/1464	13/18866	0.0741824	0.879211	0.868735	TRMT10B/CDK5RAP1/ELAC2	3
BP	GO:0099150	regulation of postsynaptic specialization assembly	3/1464	13/18866	0.0741824	0.879211	0.868735	LRFN4/LRFN1/GAP43	3
BP	GO:0106074	aminoacyl-tRNA metabolism involved in translational fidelity	3/1464	13/18866	0.0741824	0.879211	0.868735	AARS2/VARS2/PRORSD1P	3
BP	GO:0150052	regulation of postsynapse assembly	3/1464	13/18866	0.0741824	0.879211	0.868735	LRFN4/LRFN1/GAP43	3
BP	GO:1902563	regulation of neutrophil activation	3/1464	13/18866	0.0741824	0.879211	0.868735	BCR/FCGR2B/CD300A	3
BP	GO:0000723	telomere maintenance	18/1464	161/18866	0.0746059	0.879211	0.868735	TERT/TELO2/USP7/RAD51D/CTC1/HNRNPA1/HMBOX1/MAP3K4/PARP3/DCLRE1C/HNRNPC/PML/RECQL4/CCNE1/MYC/PPP1R10/PIF1/SIRT6	18
BP	GO:0006448	regulation of translational elongation	4/1464	21/18866	0.0748562	0.879211	0.868735	DPH7/ALKBH1/DPH5/CPEB2	4
BP	GO:0007130	synaptonemal complex assembly	4/1464	21/18866	0.0748562	0.879211	0.868735	REC8/BAG6/AGO4/SYCP2	4
BP	GO:0016540	protein autoprocessing	4/1464	21/18866	0.0748562	0.879211	0.868735	SHH/F12/FXN/PIDD1	4
BP	GO:0030878	thyroid gland development	4/1464	21/18866	0.0748562	0.879211	0.868735	HOXA3/SHH/SMAD3/RAF1	4
BP	GO:0060216	definitive hemopoiesis	4/1464	21/18866	0.0748562	0.879211	0.868735	BCR/CDK5RAP3/ZFP36L2/ADAR	4
BP	GO:0090201	negative regulation of release of cytochrome c from mitochondria	4/1464	21/18866	0.0748562	0.879211	0.868735	HGF/ARRB2/FXN/PAM16	4
BP	GO:0044774	mitotic DNA integrity checkpoint	13/1464	108/18866	0.0749452	0.879211	0.868735	PCBP4/CDK5RAP3/RAD9A/GIGYF2/EME2/MDC1/PML/MDM4/TICRR/EP300/PPP1R10/PIDD1/FBXO31	13
BP	GO:0070304	positive regulation of stress-activated protein kinase signaling cascade	19/1464	172/18866	0.0752033	0.879211	0.868735	CCR7/FGD2/NOX1/MAP3K4/FCGR2B/MMP8/TRAF5/DAB2IP/EDA2R/STK25/TIRAP/TNFRSF19/NOD1/DAXX/MTURN/RELL2/RPS3/EIF2AK2/XDH	19
BP	GO:0042461	photoreceptor cell development	7/1464	48/18866	0.0754954	0.879211	0.868735	TUG1/NPHP4/TH/IFT140/RPGRIP1/RDH13/CABP4	7
BP	GO:0099637	neurotransmitter receptor transport	7/1464	48/18866	0.0754954	0.879211	0.868735	HIP1/SCRIB/KIF5A/NUMB/RAB8A/MX2/AP3D1	7
BP	GO:1990573	potassium ion import across plasma membrane	7/1464	48/18866	0.0754954	0.879211	0.868735	WNK2/SLC12A9/KCNJ2/KCNK9/ATP1A2/SLC12A4/ATP1B2	7
BP	GO:0035966	response to topologically incorrect protein	22/1464	205/18866	0.0758027	0.879211	0.868735	TMEM129/ANKZF1/CDK5RAP3/ACADVL/CXXC1/BAG6/F12/ARFGAP1/HSF1/DDX11/DAB2IP/HSPA6/ATF4/STT3B/CUL7/TLN1/EP300/TATDN2/DAXX/EIF2AK2/CREB3L2/ADD1	22
BP	GO:0042493	response to drug	39/1464	397/18866	0.0758235	0.879211	0.868735	PMS1/CXCR4/CPT1A/PPOX/FZD3/TIMP4/TXNIP/TP73/PPM1F/NOS1/ABCC1/ATP8B1/SLC46A1/MBD1/ADIPOQ/HSF1/ACACB/DNMT3B/GPR52/PDE2A/PGF/APOD/CD38/TH/RET/CYP2A6/CYP2C9/CYP2C8/SRP68/HDAC5/TP53I13/ENO3/CDK9/CYP2A7/DHODH/PARP4/MYC/KMT2A/NPFF	39
BP	GO:0072511	divalent inorganic cation transport	46/1464	478/18866	0.0758895	0.879211	0.868735	TMEM37/HOMER3/LILRA2/SLC40A1/CXCR4/SLC39A12/SLC25A23/TRIM27/CCR7/ORAI2/EPB41/GSTM2/CAMK2G/CACNG6/PRKCB/NOS1/ZDHHC17/SLC39A10/ASIC1/ATP7B/KCNJ2/NMUR2/MCOLN1/TPCN1/ABL1/NIPA2/P2RX1/ARRB2/CATSPER3/SLC35G1/ATP1A2/PLA2G6/SLC39A2/CHRNA10/NPPA/PML/TRPM7/PRKACA/CACNA1H/BEST1/CCL8/CACNB2/CXCL12/CAPN3/BSPRY/LPAR3	46
BP	GO:0044728	DNA methylation or demethylation	12/1464	98/18866	0.076598	0.884881	0.874337	ATF7IP/USP7/EHMT2/MBD1/DNMT3B/ALKBH1/PICK1/GATAD2A/PRDM14/MYC/KMT2A/BAZ2A	12
BP	GO:0016331	morphogenesis of embryonic epithelium	17/1464	151/18866	0.0773934	0.884881	0.874337	LAMA5/TSC1/KAT2A/DVL1/FZD3/SHH/SCRIB/PRICKLE1/NPHP3/ABL1/GDNF/ALDH1A2/RET/STK4/PRKACA/FOLR1/TULP3	17
BP	GO:1903312	negative regulation of mRNA metabolic process	11/1464	88/18866	0.0779243	0.884881	0.874337	SRSF6/PCBP4/DND1/GDNF/U2AF2/TIRAP/HNRNPC/FUS/CDK9/BOLL/DHX9	11
BP	GO:0021885	forebrain cell migration	8/1464	58/18866	0.0779948	0.884881	0.874337	SUN1/CXCR4/SYNE2/NDEL1/DAB2IP/EFHC1/AXL/CXCL12	8
BP	GO:0006778	porphyrin-containing compound metabolic process	6/1464	39/18866	0.0781441	0.884881	0.874337	PPOX/AMBP/EIF2AK1/RSAD1/FXN/ALAS2	6
BP	GO:0030866	cortical actin cytoskeleton organization	6/1464	39/18866	0.0781441	0.884881	0.874337	EPB41/LLGL2/STRIP1/IKBKB/TLN1/ROCK2	6
BP	GO:0031076	embryonic camera-type eye development	6/1464	39/18866	0.0781441	0.884881	0.874337	WDR19/ALDH1A2/TH/IFT140/SIX3/TULP3	6
BP	GO:2000279	negative regulation of DNA biosynthetic process	6/1464	39/18866	0.0781441	0.884881	0.874337	CTC1/HNRNPA1/ADIPOQ/PARP3/HNRNPC/PIF1	6
BP	GO:0048147	negative regulation of fibroblast proliferation	5/1464	30/18866	0.0787307	0.884881	0.874337	NLRC3/DAB2IP/PARP10/CD300A/MYC	5
BP	GO:2000765	regulation of cytoplasmic translation	5/1464	30/18866	0.0787307	0.884881	0.874337	DPH7/DPH5/METTL3/CPEB2/DHX9	5
BP	GO:0050792	regulation of viral process	23/1464	217/18866	0.0787511	0.884881	0.874337	OAS1/OAS2/CXCR4/IFI16/TRIM27/TRIM22/SETDB1/TRIM25/NELFCD/ISG15/PARP10/RSAD2/PML/EP300/BST2/OASL/CDK9/CCL8/ADAR/MAVS/EIF2AK2/SRPK1/DHX9	23
BP	GO:0006479	protein methylation	20/1464	184/18866	0.078914	0.884881	0.874337	EZH1/RTF1/JARID2/PCMTD2/OGT/SETDB1/CXXC1/TTLL12/EHMT2/SETD5/DNMT3B/RAB3D/ZNF274/ZNF335/KMT2D/PRDM14/KMT2B/SETD6/KMT2A/CHTOP	20
BP	GO:0006611	protein export from nucleus	20/1464	184/18866	0.078914	0.884881	0.874337	SRSF6/TSC1/THOC1/RBM15B/SYMPK/SRSF5/CCHCR1/RRS1/NXF1/POLDIP3/PABPN1/UPF2/POM121/U2AF2/XPO5/AKAP8L/THOC6/PRKACA/XPO6/CHTOP	20
BP	GO:0008213	protein alkylation	20/1464	184/18866	0.078914	0.884881	0.874337	EZH1/RTF1/JARID2/PCMTD2/OGT/SETDB1/CXXC1/TTLL12/EHMT2/SETD5/DNMT3B/RAB3D/ZNF274/ZNF335/KMT2D/PRDM14/KMT2B/SETD6/KMT2A/CHTOP	20
BP	GO:0008033	tRNA processing	15/1464	130/18866	0.0789248	0.884881	0.874337	QTRT1/AARS2/NSUN6/TSEN54/DTWD1/TRMT10B/THUMPD2/CDK5RAP1/ELAC2/ALKBH1/GTPBP3/TRMT1/TSEN2/TRMU/TSEN34	15
BP	GO:0048706	embryonic skeletal system development	15/1464	130/18866	0.0789248	0.884881	0.874337	WDR19/HOXA3/RBP4/HOXD1/SHH/HSD17B7/SMAD3/HOXB9/MEGF8/TAPT1/IFT140/HOXA11/UCMA/TULP3/HOXC5	15
BP	GO:0006302	double-strand break repair	27/1464	262/18866	0.0797832	0.892387	0.881754	RAD52/ACTR5/REC8/INO80/RAD51D/EME2/RPA4/FAN1/HSF1/PARP3/POLM/DDX11/DCLRE1C/SPIDR/SETX/UIMC1/MMS19/MDC1/PML/KAT5/ERCC8/RECQL4/FUS/UBR5/HERC2/MTA1/SIRT6	27
BP	GO:0001655	urogenital system development	33/1464	330/18866	0.0799153	0.892387	0.881754	LAMA5/TSC1/UBE3A/RBP4/SHH/TP73/CYP26A1/SMAD3/LZTS2/ACAT1/GPC3/BAG6/ADIPOQ/PTPRO/NPHP3/PGF/GDNF/ARID5B/KLF15/ALDH1A2/MPST/RET/GLI1/DLL1/STK11/APH1A/FKBP4/HOXA11/LRP4/ANGPT1/MYC/CXCR2/GDF11	33
BP	GO:0070302	regulation of stress-activated protein kinase signaling cascade	25/1464	240/18866	0.0809958	0.900836	0.890102	CCR7/FGD2/NOX1/MAP3K4/HGF/NCOR1/AMBP/FCGR2B/MMP8/TRAF5/DAB2IP/EDA2R/STK25/TIRAP/TNFRSF19/NPPA/NOD1/DAXX/MTURN/PTPN22/RELL2/RPS3/EIF2AK2/MYC/XDH	25
BP	GO:0070663	regulation of leukocyte proliferation	25/1464	240/18866	0.0809958	0.900836	0.890102	CD209/VSIG4/DNAJA3/MAD1L1/CLEC4G/SHH/SCRIB/FCGR2B/CARD11/SLC39A10/MPL/MZB1/CD38/TIRAP/TNFSF8/ZNF335/TICAM1/PTPN22/BST2/RPS3/CCL8/VTCN1/CD320/CD300A/PDE5A	25
BP	GO:0006304	DNA modification	14/1464	120/18866	0.0814694	0.902852	0.892094	ATF7IP/USP7/EHMT2/MBD1/EXOSC6/PARP3/DNMT3B/ALKBH1/PICK1/GATAD2A/PRDM14/MYC/KMT2A/BAZ2A	14
BP	GO:0051099	positive regulation of binding	19/1464	174/18866	0.0821722	0.902852	0.892094	TERT/MAU2/HOXA3/EPB41/HMBOX1/CAPRIN2/MMP8/HSF1/DDX11/ABL1/FLOT1/RALB/MFNG/TICAM1/EP300/STK4/CDK9/DHX9/ADD1	19
BP	GO:0071214	cellular response to abiotic stimulus	33/1464	331/18866	0.0824572	0.902852	0.892094	GUCA1C/RCSD1/SLC25A23/IFI16/HVCN1/OPN5/ACTR5/MAPK13/INO80/NOX1/RAD9A/ASIC1/KCNJ2/HSF1/MCOLN1/GPR52/PDE2A/LRRC8E/SPIDR/ATF4/ATP1A2/GRK1/NPPA/MAP3K1/EP300/METTL3/STK11/PIEZO1/CRY2/MYC/EFHD1/CAPN3/OPN4	33
BP	GO:0104004	cellular response to environmental stimulus	33/1464	331/18866	0.0824572	0.902852	0.892094	GUCA1C/RCSD1/SLC25A23/IFI16/HVCN1/OPN5/ACTR5/MAPK13/INO80/NOX1/RAD9A/ASIC1/KCNJ2/HSF1/MCOLN1/GPR52/PDE2A/LRRC8E/SPIDR/ATF4/ATP1A2/GRK1/NPPA/MAP3K1/EP300/METTL3/STK11/PIEZO1/CRY2/MYC/EFHD1/CAPN3/OPN4	33
BP	GO:0006654	phosphatidic acid biosynthetic process	7/1464	49/18866	0.0824759	0.902852	0.892094	DGKA/DGKQ/LPCAT4/DGKD/DGKE/ACP6/GPD1L	7
BP	GO:0032663	regulation of interleukin-2 production	7/1464	49/18866	0.0824759	0.902852	0.892094	HOMER3/VSIG4/TRIM27/CARD11/KAT5/RPS3/SPTBN1	7
BP	GO:0048641	regulation of skeletal muscle tissue development	7/1464	49/18866	0.0824759	0.902852	0.892094	SHH/DDX17/WNT10B/FLOT1/USP19/DLL1/NLN	7
BP	GO:2000107	negative regulation of leukocyte apoptotic process	7/1464	49/18866	0.0824759	0.902852	0.892094	CCR7/SLC39A10/IRF7/AXL/PTCRA/CXCL12/CXCR2	7
BP	GO:0045637	regulation of myeloid cell differentiation	27/1464	263/18866	0.0826487	0.902965	0.892206	C1QC/P4HTM/SLC9B2/BRD1/L3MBTL1/PRKCB/TCTA/PPARGC1B/ADIPOQ/MPL/TNRC6A/AGO4/ISG15/FAXDC2/IRF7/KMT2D/DLL1/KLF13/EP300/ANKRD54/IL17A/MTURN/ACIN1/KMT2B/IL20/MYC/KMT2A	27
BP	GO:0006400	tRNA modification	11/1464	89/18866	0.0830011	0.903922	0.893151	QTRT1/AARS2/NSUN6/DTWD1/TRMT10B/THUMPD2/CDK5RAP1/ALKBH1/GTPBP3/TRMT1/TRMU	11
BP	GO:0010508	positive regulation of autophagy	15/1464	131/18866	0.0830613	0.903922	0.893151	TSC1/CALCOCO2/TRIM27/VPS13C/TRIM22/RAB12/TPCN1/SESN1/RALB/MEFV/NOD1/TICAM1/KAT5/STK11/CDC37	15
BP	GO:0051403	stress-activated MAPK cascade	29/1464	286/18866	0.0838207	0.90617	0.895372	CCR7/SH2D3A/FGD2/MAPK13/NOX1/MAP3K4/HGF/NCOR1/AMBP/FCGR2B/MMP8/IKBKB/TRAF5/DAB2IP/EDA2R/TAB1/STK25/TIRAP/TNFRSF19/NPPA/NOD1/DAXX/MTURN/PTPN22/RELL2/RPS3/EIF2AK2/MYC/XDH	29
BP	GO:0007596	blood coagulation	34/1464	343/18866	0.0838936	0.90617	0.895372	AKAP10/HPS4/SH2B1/DGKA/HBB/SHH/DGKQ/FGB/PRKCB/HRG/MAFK/TREML1/P2RY1/F12/HBD/DOCK6/MPL/SH2B2/PIK3R6/SLC4A1/P2RX1/ITPK1/ARRB2/PIK3R5/PRKAR1B/DGKD/TLN1/KNG1/IFNA4/AXL/PRKACA/DGKE/AKAP1/RAF1	34
BP	GO:0072009	nephron epithelium development	13/1464	110/18866	0.0839262	0.90617	0.895372	LAMA5/SHH/LZTS2/ACAT1/GPC3/ADIPOQ/PTPRO/PGF/GDNF/KLF15/DLL1/HOXA11/MYC	13
BP	GO:1904659	glucose transmembrane transport	13/1464	110/18866	0.0839262	0.90617	0.895372	TERT/TSC1/C2CD5/PRKCB/GPC3/ADIPOQ/CAPN10/SORBS1/OCLN/KLF15/ZDHHC7/ARPP19/SIRT6	13
BP	GO:0031102	neuron projection regeneration	8/1464	59/18866	0.0844088	0.90617	0.895372	CERS2/HGF/NDEL1/APOD/FOLR1/LRIG2/GAP43/STK24	8
BP	GO:0048008	platelet-derived growth factor receptor signaling pathway	8/1464	59/18866	0.0844088	0.90617	0.895372	HIP1/BCR/TXNIP/ADIPOQ/ABL1/APOD/ARID5B/LRIG2	8
BP	GO:0016202	regulation of striated muscle tissue development	17/1464	153/18866	0.0850318	0.90617	0.895372	SOX6/KAT2A/RBP4/SHH/DDX17/JARID2/TP73/WNT10B/SMAD3/FLOT1/ARRB2/USP19/GLI1/DLL1/LUC7L/NLN/BMP10	17
BP	GO:0050670	regulation of lymphocyte proliferation	23/1464	219/18866	0.0851056	0.90617	0.895372	CD209/VSIG4/DNAJA3/MAD1L1/CLEC4G/SHH/SCRIB/FCGR2B/CARD11/SLC39A10/MPL/MZB1/CD38/TIRAP/TNFSF8/ZNF335/TICAM1/PTPN22/RPS3/VTCN1/CD320/CD300A/PDE5A	23
BP	GO:0033157	regulation of intracellular protein transport	27/1464	264/18866	0.0855828	0.90617	0.895372	C2CD5/HPS4/TM9SF4/SEC16B/SHH/KCNB1/TP73/SMAD3/MTCL1/NDEL1/ATP13A2/ADIPOQ/MIEF1/PPP3CC/NUMA1/UBL4B/APOD/SEC16A/XPO5/AKAP8L/ABLIM3/NOLC1/PRKACA/USP36/ANGPT1/UBR5/MAVS	27
BP	GO:0030218	erythrocyte differentiation	14/1464	121/18866	0.0858897	0.90617	0.895372	SOX6/P4HTM/BRD1/KLF2/CDK5RAP3/SLC4A1/L3MBTL3/ISG15/KLF13/ANKRD54/ACIN1/ALAS2/ADAR/ADD1	14
BP	GO:0002313	mature B cell differentiation involved in immune response	4/1464	22/18866	0.0861169	0.90617	0.895372	FCGR2B/ITFG2/MFNG/DLL1	4
BP	GO:0045061	thymic T cell selection	4/1464	22/18866	0.0861169	0.90617	0.895372	CCR7/SHH/CARD11/STK11	4
BP	GO:0055093	response to hyperoxia	4/1464	22/18866	0.0861169	0.90617	0.895372	NOX1/POLG/DNMT3B/ATP6	4
BP	GO:0071467	cellular response to pH	4/1464	22/18866	0.0861169	0.90617	0.895372	HVCN1/NOX1/ASIC1/MCOLN1	4
BP	GO:0009187	cyclic nucleotide metabolic process	6/1464	40/18866	0.086201	0.90617	0.895372	PDE2A/NPPA/PDE8A/ADCY4/PDE5A/PDE7A	6
BP	GO:0016572	histone phosphorylation	6/1464	40/18866	0.086201	0.90617	0.895372	MST1/PRKCB/AKAP8L/AKAP8/BAZ1B/CDK9	6
BP	GO:0097352	autophagosome maturation	6/1464	40/18866	0.086201	0.90617	0.895372	MFSD8/CALCOCO2/STX17/MCOLN1/TECPR1/ATG14	6
BP	GO:1901381	positive regulation of potassium ion transmembrane transport	6/1464	40/18866	0.086201	0.90617	0.895372	WNK2/KCNJ2/KCNIP2/NPPA/KCNA1/ATP1B2	6
BP	GO:0010769	regulation of cell morphogenesis involved in differentiation	31/1464	310/18866	0.0873417	0.909823	0.898982	GOLGA4/TRAK1/UBE3A/PARP6/SS18L1/FGB/YTHDF1/GORASP1/LIMS2/CAPRIN2/PPP1R9A/SEMA3G/NDEL1/RREB1/ZFYVE27/PTPRO/ZSWIM8/MEGF8/MPL/ABL1/STK25/RET/SEMA3B/CUL7/TRIOBP/STK11/LRP4/CXCL12/MYOC/LPAR3/FBXO31	31
BP	GO:0090075	relaxation of muscle	5/1464	31/18866	0.088164	0.909823	0.898982	GSTM2/P2RY1/KCNJ2/ATP1A2/PDE5A	5
BP	GO:0099003	vesicle-mediated transport in synapse	23/1464	220/18866	0.088407	0.909823	0.898982	ITSN1/DVL1/DGKQ/NAPB/PRKCB/SCRIB/FBXL20/P2RY1/PPP3CC/P2RX1/TH/PRKAR1B/NUMB/SYN3/GIT1/STXBP5L/RAB8A/P2RY4/MX2/DNAJC5/VAMP1/CACNB2/AP3D1	23
BP	GO:0043254	regulation of protein-containing complex assembly	43/1464	449/18866	0.0886403	0.909823	0.898982	GBA2/ATF7IP/SLC39A12/DHX33/TRIM27/SSH3/CCR7/WNT10B/NAPB/RICTOR/HRG/NLRC3/PPP1R9A/SSH2/AVIL/HSF1/NUMA1/ABL1/SPIDR/DAB2IP/OCLN/RALB/CHD1L/ATAT1/MEFV/PICK1/TIRAP/PSRC1/ERCC3/CPTP/TICAM1/EP300/TRIOBP/PIEZO1/FKBP4/RPS3/EIF2AK2/HCFC1/FLII/SPTBN1/RAF1/ACTR3B/ADD1	43
BP	GO:0035303	regulation of dephosphorylation	22/1464	209/18866	0.0888967	0.909823	0.898982	TSC1/URI1/CEP192/SYMPK/CDK5RAP3/SMAD3/SLC39A10/PPARGC1B/IKBKB/PPP6R2/PPP1R35/CABIN1/ARPP19/SFI1/PHACTR1/CRY2/DMPK/ROCK2/PPP2R5D/EIF2AK2/CD300A/PPP1R10	22
BP	GO:0010421	hydrogen peroxide-mediated programmed cell death	3/1464	14/18866	0.0891662	0.909823	0.898982	HGF/TRAP1/STK25	3
BP	GO:0014819	regulation of skeletal muscle contraction	3/1464	14/18866	0.0891662	0.909823	0.898982	GSTM2/KCNJ2/DMPK	3
BP	GO:0030007	cellular potassium ion homeostasis	3/1464	14/18866	0.0891662	0.909823	0.898982	KCNJ2/ATP1A2/ATP1B2	3
BP	GO:0030207	chondroitin sulfate catabolic process	3/1464	14/18866	0.0891662	0.909823	0.898982	IDUA/BCAN/NCAN	3
BP	GO:0042762	regulation of sulfur metabolic process	3/1464	14/18866	0.0891662	0.909823	0.898982	PDK4/PDPR/PDK2	3
BP	GO:0043558	regulation of translational initiation in response to stress	3/1464	14/18866	0.0891662	0.909823	0.898982	EIF2AK1/ATF4/EIF2AK2	3
BP	GO:0045799	positive regulation of chromatin assembly or disassembly	3/1464	14/18866	0.0891662	0.909823	0.898982	ATF7IP/SETDB1/SIRT6	3
BP	GO:0050966	detection of mechanical stimulus involved in sensory perception of pain	3/1464	14/18866	0.0891662	0.909823	0.898982	CXCR4/KCNA1/CXCL12	3
BP	GO:0060831	smoothened signaling pathway involved in dorsal/ventral neural tube patterning	3/1464	14/18866	0.0891662	0.909823	0.898982	WDR19/PRKACA/TULP3	3
BP	GO:0097468	programmed cell death in response to reactive oxygen species	3/1464	14/18866	0.0891662	0.909823	0.898982	HGF/TRAP1/STK25	3
BP	GO:1900044	regulation of protein K63-linked ubiquitination	3/1464	14/18866	0.0891662	0.909823	0.898982	PARP10/PTPN22/UBR5	3
BP	GO:0016482	cytosolic transport	18/1464	165/18866	0.0894109	0.910648	0.899797	TBC1D14/VPS52/MON2/TRIM27/VPS13C/STX16/SGSM2/KIF5A/ANKFY1/TBC1D17/NUMA1/HOOK2/HEATR5B/FAM160A2/GGA1/TBC1D5/CORO7/PTPN23	18
BP	GO:0019674	NAD metabolic process	7/1464	50/18866	0.0898146	0.910988	0.900133	ADPGK/FOXK1/PKLR/CD38/ENO3/NADK/GPD1L	7
BP	GO:0045104	intermediate filament cytoskeleton organization	7/1464	50/18866	0.0898146	0.910988	0.900133	SHH/KRT74/NDEL1/EVPLL/PRPH/EPPK1/RAF1	7
BP	GO:0014032	neural crest cell development	10/1464	80/18866	0.0899357	0.910988	0.900133	LAMA5/SHH/SEMA3G/GDNF/TAPT1/ALDH1A2/RET/SEMA3B/NOLC1/FOLR1	10
BP	GO:0061951	establishment of protein localization to plasma membrane	8/1464	60/18866	0.0911228	0.921335	0.910356	GOLGA4/GORASP1/SCRIB/BBS2/SEC16A/GGA1/RAB8A/SPTBN1	8
BP	GO:0032637	interleukin-8 production	12/1464	101/18866	0.0913123	0.921575	0.910594	LILRA2/MAP2K5/ADIPOQ/CACTIN/ZNF580/NLRP10/IL17D/TIRAP/SSC5D/NOD1/PTPN22/MAVS	12
BP	GO:0006470	protein dephosphorylation	32/1464	323/18866	0.0917125	0.923062	0.912063	PPP1R3E/TSC1/URI1/SSH3/SYMPK/PPM1K/CAMK2G/PPM1F/SSH2/SLC39A10/PTPRO/PPP3CC/IKBKB/PPP6R2/PPP1R35/PGP/TAB1/CABIN1/CDC25B/STK11/ARPP19/PTPN22/PHACTR1/CRY2/DMPK/ROCK2/PPP2R5D/EIF2AK2/SBF1/CD300A/PPP1R10/PTPN23	32
BP	GO:0032944	regulation of mononuclear cell proliferation	23/1464	221/18866	0.0917917	0.923062	0.912063	CD209/VSIG4/DNAJA3/MAD1L1/CLEC4G/SHH/SCRIB/FCGR2B/CARD11/SLC39A10/MPL/MZB1/CD38/TIRAP/TNFSF8/ZNF335/TICAM1/PTPN22/RPS3/VTCN1/CD320/CD300A/PDE5A	23
BP	GO:0099504	synaptic vesicle cycle	21/1464	199/18866	0.0928708	0.926731	0.915689	ITSN1/DVL1/DGKQ/NAPB/PRKCB/SCRIB/FBXL20/P2RY1/PPP3CC/P2RX1/TH/PRKAR1B/SYN3/GIT1/STXBP5L/P2RY4/MX2/DNAJC5/VAMP1/CACNB2/AP3D1	21
BP	GO:0046822	regulation of nucleocytoplasmic transport	13/1464	112/18866	0.0935583	0.926731	0.915689	RBM4/SHH/SMAD3/APOD/XPO5/AKAP8L/NOLC1/PRKACA/MX2/ANGPT1/UBR5/MAVS/DHX9	13
BP	GO:0001656	metanephros development	11/1464	91/18866	0.093755	0.926731	0.915689	SHH/ACAT1/GPC3/ADIPOQ/GDNF/RET/APH1A/HOXA11/MYC/CXCR2/GDF11	11
BP	GO:0001843	neural tube closure	11/1464	91/18866	0.093755	0.926731	0.915689	TSC1/KAT2A/DVL1/FZD3/SCRIB/PRICKLE1/NPHP3/ABL1/PRKACA/FOLR1/TULP3	11
BP	GO:0030890	positive regulation of B cell proliferation	6/1464	41/18866	0.0946958	0.926731	0.915689	CARD11/SLC39A10/CD38/TIRAP/TICAM1/CD320	6
BP	GO:0031062	positive regulation of histone methylation	6/1464	41/18866	0.0946958	0.926731	0.915689	RTF1/JARID2/OGT/DNMT3B/KMT2A/CHTOP	6
BP	GO:1900117	regulation of execution phase of apoptosis	6/1464	41/18866	0.0946958	0.926731	0.915689	FZD3/HSF1/DFFA/RPS3/PAM16/CIDEA	6
BP	GO:0072331	signal transduction by p53 class mediator	27/1464	267/18866	0.0948013	0.926731	0.915689	IFI16/L3MBTL1/PCBP4/ING5/CDK5RAP3/RRS1/TP73/PRKAB2/RAD9A/MEAF6/BAG6/EHMT2/CSNK2B/EDA2R/NOP2/SHISA5/PML/MDM4/KAT5/EP300/STK11/AEN/SUPT16H/PDK2/PIDD1/MYBBP1A/TAF6	27
BP	GO:0032388	positive regulation of intracellular transport	23/1464	222/18866	0.0952601	0.926731	0.915689	C2CD5/HPS4/TM9SF4/SEC16B/SHH/KCNB1/TP73/SMAD3/MTCL1/MIEF1/PPP3CC/NUMA1/CAPN10/UBL4B/SEC16A/ABLIM3/STK11/PRKACA/USP36/UBR5/MAVS/PTPN23/DHX9	23
BP	GO:1901888	regulation of cell junction assembly	21/1464	200/18866	0.0965679	0.926731	0.915689	TSC1/GPBAR1/PPM1F/LRFN4/HRG/SMAD3/PPP1R9A/SETD5/IL1RAPL2/IKBKB/ABL1/FLOT1/APOD/OCLN/NPHP4/LRFN1/PRKACA/LRRN1/ROCK2/GAP43/MYOC	21
BP	GO:0032006	regulation of TOR signaling	12/1464	102/18866	0.0965767	0.926731	0.915689	TSC1/TELO2/DGKQ/UBR2/RICTOR/SIK3/SZT2/ITFG2/SESN1/STK11/WDR59/TTI1	12
BP	GO:0110020	regulation of actomyosin structure organization	12/1464	102/18866	0.0965767	0.926731	0.915689	TSC1/PPM1F/ARHGEF18/SMAD3/PPP1R9A/ARHGEF15/TESK1/ABL1/BMP10/ROCK2/MYOC/MYLK3	12
BP	GO:0048285	organelle fission	45/1464	476/18866	0.0971744	0.926731	0.915689	MAU2/SUN1/MYO19/C11orf80/WRAP73/SEC16B/SH2B1/L3MBTL1/CDC16/CEP192/KIFC2/MAD1L1/CDK13/MSTO1/NEK9/UBR2/KNTC1/RRS1/REC8/INO80/PRKCB/RAD51D/EME2/POGZ/LRP5/BAG6/NDEL1/HSF1/MIEF1/NUMA1/AGO4/STAT2/SYCP2/AKAP8L/PSRC1/CUL7/CDC25B/SPDYA/AKAP8/MX2/CCNE1/HORMAD2/CORT/DHODH/KNSTRN	45
BP	GO:0007599	hemostasis	34/1464	348/18866	0.0973373	0.926731	0.915689	AKAP10/HPS4/SH2B1/DGKA/HBB/SHH/DGKQ/FGB/PRKCB/HRG/MAFK/TREML1/P2RY1/F12/HBD/DOCK6/MPL/SH2B2/PIK3R6/SLC4A1/P2RX1/ITPK1/ARRB2/PIK3R5/PRKAR1B/DGKD/TLN1/KNG1/IFNA4/AXL/PRKACA/DGKE/AKAP1/RAF1	34
BP	GO:1901861	regulation of muscle tissue development	17/1464	156/18866	0.0973754	0.926731	0.915689	SOX6/KAT2A/RBP4/SHH/DDX17/JARID2/TP73/WNT10B/SMAD3/FLOT1/ARRB2/USP19/GLI1/DLL1/LUC7L/NLN/BMP10	17
BP	GO:0045739	positive regulation of DNA repair	9/1464	71/18866	0.0974193	0.926731	0.915689	PARP3/DDX11/SPIDR/UIMC1/MMS19/ERCC8/FUS/RPS3/DHX9	9
BP	GO:0045103	intermediate filament-based process	7/1464	51/18866	0.0975082	0.926731	0.915689	SHH/KRT74/NDEL1/EVPLL/PRPH/EPPK1/RAF1	7
BP	GO:0048255	mRNA stabilization	7/1464	51/18866	0.0975082	0.926731	0.915689	DND1/GDNF/TIRAP/HNRNPC/FUS/BOLL/DHX9	7
BP	GO:0072523	purine-containing compound catabolic process	7/1464	51/18866	0.0975082	0.926731	0.915689	NUDT3/ACAT1/PDE2A/PDE8A/PDE5A/PDE7A/XDH	7
BP	GO:0007050	cell cycle arrest	24/1464	234/18866	0.0979033	0.926731	0.915689	UHRF2/PCBP4/WDR6/MAPK12/TP73/WNT10B/PRKAB2/SMAD3/CDKN1C/RASSF1/ABL1/DAB2IP/ZBTB49/PML/MDM4/EP300/STK11/PRKACA/CDK9/MYC/PIDD1/TBRG1/MYBBP1A/RNF112	24
BP	GO:0033619	membrane protein proteolysis	8/1464	61/18866	0.0981351	0.926731	0.915689	APH1B/TIMP4/NCSTN/HM13/RET/APH1A/LRIG2/SPPL2B	8
BP	GO:0002052	positive regulation of neuroblast proliferation	4/1464	23/18866	0.0981453	0.926731	0.915689	FZD3/SHH/DCT/ZNF335	4
BP	GO:0018027	peptidyl-lysine dimethylation	4/1464	23/18866	0.0981453	0.926731	0.915689	EHMT2/KMT2D/KMT2B/KMT2A	4
BP	GO:0032693	negative regulation of interleukin-10 production	4/1464	23/18866	0.0981453	0.926731	0.915689	FCGR2B/TRIB2/MMP8/DLL1	4
BP	GO:0032703	negative regulation of interleukin-2 production	4/1464	23/18866	0.0981453	0.926731	0.915689	HOMER3/VSIG4/TRIM27/KAT5	4
BP	GO:0051457	maintenance of protein location in nucleus	4/1464	23/18866	0.0981453	0.926731	0.915689	SUN1/SUPT7L/PML/NR5A1	4
BP	GO:0060149	negative regulation of posttranscriptional gene silencing	4/1464	23/18866	0.0981453	0.926731	0.915689	TERT/NCOR1/DND1/ADAR	4
BP	GO:0060967	negative regulation of gene silencing by RNA	4/1464	23/18866	0.0981453	0.926731	0.915689	TERT/NCOR1/DND1/ADAR	4
BP	GO:0072215	regulation of metanephros development	4/1464	23/18866	0.0981453	0.926731	0.915689	ADIPOQ/GDNF/RET/MYC	4
BP	GO:2000050	regulation of non-canonical Wnt signaling pathway	4/1464	23/18866	0.0981453	0.926731	0.915689	DAAM2/GPC3/NPHP3/ABL1	4
BP	GO:0042744	hydrogen peroxide catabolic process	5/1464	32/18866	0.0981559	0.926731	0.915689	HBB/GPX3/HBD/MPO/DUOX2	5
BP	GO:0046320	regulation of fatty acid oxidation	5/1464	32/18866	0.0981559	0.926731	0.915689	PDK4/CPT1A/ACADVL/ACACB/PLIN5	5
BP	GO:0051503	adenine nucleotide transport	5/1464	32/18866	0.0981559	0.926731	0.915689	SLC25A23/SLC25A36/SLC25A45/SLC25A42/SLC25A6	5
BP	GO:0061036	positive regulation of cartilage development	5/1464	32/18866	0.0981559	0.926731	0.915689	SOX6/SMAD3/TAPT1/HOXA11/BMP10	5
BP	GO:0070528	protein kinase C signaling	5/1464	32/18866	0.0981559	0.926731	0.915689	DGKQ/FLOT1/PLA2G6/DGKD/GPD1L	5
BP	GO:0070570	regulation of neuron projection regeneration	5/1464	32/18866	0.0981559	0.926731	0.915689	CERS2/HGF/NDEL1/LRIG2/STK24	5
BP	GO:0062197	cellular response to chemical stress	35/1464	360/18866	0.0985872	0.929226	0.918154	TSC1/RCSD1/SLC25A23/ANKZF1/KLF2/RAD52/MAPK13/NOX1/GPX3/SZT2/HGF/ATP13A2/PPARGC1B/HSF1/DNMT3B/ZNF580/ABL1/LRRC8E/TRAP1/MPO/SETX/ATF4/STK25/PML/AXL/RPS3/FXN/PDE8A/PDK2/STAT6/EFHD1/CPEB2/STK24/RNF112/CAPN3	35
BP	GO:0042147	retrograde transport, endosome to Golgi	11/1464	92/18866	0.099432	0.934022	0.922893	TBC1D14/VPS52/TRIM27/STX16/SGSM2/ANKFY1/TBC1D17/NUMA1/HEATR5B/GGA1/TBC1D5	11
BP	GO:0060606	tube closure	11/1464	92/18866	0.099432	0.934022	0.922893	TSC1/KAT2A/DVL1/FZD3/SCRIB/PRICKLE1/NPHP3/ABL1/PRKACA/FOLR1/TULP3	11
BP	GO:0050817	coagulation	34/1464	349/18866	0.100188	0.936288	0.925132	AKAP10/HPS4/SH2B1/DGKA/HBB/SHH/DGKQ/FGB/PRKCB/HRG/MAFK/TREML1/P2RY1/F12/HBD/DOCK6/MPL/SH2B2/PIK3R6/SLC4A1/P2RX1/ITPK1/ARRB2/PIK3R5/PRKAR1B/DGKD/TLN1/KNG1/IFNA4/AXL/PRKACA/DGKE/AKAP1/RAF1	34
BP	GO:0071695	anatomical structure maturation	24/1464	235/18866	0.101426	0.936288	0.925132	GLDN/EPHA8/RERE/C1QA/BRD1/PTH1R/KLF2/WNT10B/REC8/PABPC1L/FEV/ALDH1A2/CATSPER3/RET/PICK1/KCNIP2/L3MBTL3/CDC25B/MTCH1/AXL/PRKACA/SIX3/MYOC/GDF11	24
BP	GO:0048634	regulation of muscle organ development	17/1464	157/18866	0.101728	0.936288	0.925132	SOX6/KAT2A/RBP4/SHH/DDX17/JARID2/TP73/WNT10B/SMAD3/FLOT1/ARRB2/USP19/GLI1/DLL1/LUC7L/NLN/BMP10	17
BP	GO:0051017	actin filament bundle assembly	17/1464	157/18866	0.101728	0.936288	0.925132	TSC1/AIF1L/PPM1F/ARHGEF18/SMAD3/PPP1R9A/ARHGEF15/TESK1/ABL1/PDLIM1/SORBS1/SHROOM1/FSCN3/PHACTR1/ROCK2/MYOC/ADD1	17
BP	GO:0072001	renal system development	29/1464	292/18866	0.101804	0.936288	0.925132	LAMA5/TSC1/RBP4/SHH/TP73/CYP26A1/SMAD3/LZTS2/ACAT1/GPC3/BAG6/ADIPOQ/PTPRO/NPHP3/PGF/GDNF/ARID5B/KLF15/ALDH1A2/MPST/RET/DLL1/APH1A/HOXA11/LRP4/ANGPT1/MYC/CXCR2/GDF11	29
BP	GO:0008630	intrinsic apoptotic signaling pathway in response to DNA damage	12/1464	103/18866	0.102021	0.936288	0.925132	IFI16/TP73/RAD9A/BAG6/ABL1/SHISA5/CIDEB/PML/EP300/AEN/RPS3/CXCL12	12
BP	GO:0046942	carboxylic acid transport	34/1464	350/18866	0.103094	0.936288	0.925132	SLC7A8/CPT1A/SLC25A20/SLC38A5/SLC7A6/FOLR2/PRKAB2/SLC25A45/SLC16A5/SFXN4/LLGL2/SLC38A1/THRSP/ABCC1/ATP8B1/SLC46A1/NMUR2/ACACB/SLC6A18/SLC43A1/SLC27A3/FABP4/LRRC8E/ATP1A2/PLA2G6/SLCO1A2/EMB/SLC38A7/FOLR1/PROCA1/SFXN5/HRH3/ABCD4/SLC7A4	34
BP	GO:0001504	neurotransmitter uptake	6/1464	42/18866	0.103621	0.936288	0.925132	SLC29A2/NOS1/SLC38A1/FLOT1/GDNF/ATP1A2	6
BP	GO:0008645	hexose transmembrane transport	13/1464	114/18866	0.103843	0.936288	0.925132	TERT/TSC1/C2CD5/PRKCB/GPC3/ADIPOQ/CAPN10/SORBS1/OCLN/KLF15/ZDHHC7/ARPP19/SIRT6	13
BP	GO:0022037	metencephalon development	13/1464	114/18866	0.103843	0.936288	0.925132	RERE/KAT2A/SCRIB/FCGR2B/NCSTN/B4GALT2/ABL1/ND4/GLI1/DLL1/COX1/TTBK2/SDF4	13
BP	GO:0001838	embryonic epithelial tube formation	14/1464	125/18866	0.105063	0.936288	0.925132	TSC1/KAT2A/DVL1/FZD3/SCRIB/PRICKLE1/NPHP3/ABL1/GDNF/RET/STK4/PRKACA/FOLR1/TULP3	14
BP	GO:0030968	endoplasmic reticulum unfolded protein response	14/1464	125/18866	0.105063	0.936288	0.925132	CDK5RAP3/ACADVL/CXXC1/ARFGAP1/DDX11/DAB2IP/ATF4/CUL7/TLN1/EP300/TATDN2/EIF2AK2/CREB3L2/ADD1	14
BP	GO:0006388	tRNA splicing, via endonucleolytic cleavage and ligation	3/1464	15/18866	0.105293	0.936288	0.925132	TSEN54/TSEN2/TSEN34	3
BP	GO:0009130	pyrimidine nucleoside monophosphate biosynthetic process	3/1464	15/18866	0.105293	0.936288	0.925132	UCKL1/DCTD/DHODH	3
BP	GO:0015671	oxygen transport	3/1464	15/18866	0.105293	0.936288	0.925132	HBB/HBD/MYC	3
BP	GO:0020027	hemoglobin metabolic process	3/1464	15/18866	0.105293	0.936288	0.925132	EIF2AK1/ALAS2/ADD1	3
BP	GO:0021535	cell migration in hindbrain	3/1464	15/18866	0.105293	0.936288	0.925132	RERE/TTBK2/ATP1B2	3
BP	GO:0021924	cell proliferation in external granule layer	3/1464	15/18866	0.105293	0.936288	0.925132	RERE/SHH/GLI1	3
BP	GO:0021930	cerebellar granule cell precursor proliferation	3/1464	15/18866	0.105293	0.936288	0.925132	RERE/SHH/GLI1	3
BP	GO:0030238	male sex determination	3/1464	15/18866	0.105293	0.936288	0.925132	MAP3K4/SF1/NR5A1	3
BP	GO:0032328	alanine transport	3/1464	15/18866	0.105293	0.936288	0.925132	SLC7A8/SLC38A5/SLC38A7	3
BP	GO:0045820	negative regulation of glycolytic process	3/1464	15/18866	0.105293	0.936288	0.925132	NCOR1/SLC4A1/SIRT6	3
BP	GO:0050651	dermatan sulfate proteoglycan biosynthetic process	3/1464	15/18866	0.105293	0.936288	0.925132	CHST12/BCAN/NCAN	3
BP	GO:0050862	positive regulation of T cell receptor signaling pathway	3/1464	15/18866	0.105293	0.936288	0.925132	CCR7/CARD11/RPS3	3
BP	GO:0051589	negative regulation of neurotransmitter transport	3/1464	15/18866	0.105293	0.936288	0.925132	NOS1/PPP1R9A/ASIC1	3
BP	GO:0071474	cellular hyperosmotic response	3/1464	15/18866	0.105293	0.936288	0.925132	RCSD1/SLC25A23/EFHD1	3
BP	GO:0097202	activation of cysteine-type endopeptidase activity	3/1464	15/18866	0.105293	0.936288	0.925132	IFI16/LGMN/CIDEB	3
BP	GO:1901550	regulation of endothelial cell development	3/1464	15/18866	0.105293	0.936288	0.925132	IKBKB/ROCK2/ADD1	3
BP	GO:1902187	negative regulation of viral release from host cell	3/1464	15/18866	0.105293	0.936288	0.925132	TRIM27/TRIM25/PML	3
BP	GO:1903140	regulation of establishment of endothelial barrier	3/1464	15/18866	0.105293	0.936288	0.925132	IKBKB/ROCK2/ADD1	3
BP	GO:2000095	regulation of Wnt signaling pathway, planar cell polarity pathway	3/1464	15/18866	0.105293	0.936288	0.925132	GPC3/NPHP3/ABL1	3
BP	GO:0032233	positive regulation of actin filament bundle assembly	8/1464	62/18866	0.105443	0.936288	0.925132	TSC1/PPM1F/SMAD3/ARHGEF15/TESK1/ABL1/ROCK2/MYOC	8
BP	GO:0045824	negative regulation of innate immune response	8/1464	62/18866	0.105443	0.936288	0.925132	VSIG4/IFI16/NLRC3/TTLL12/CACTIN/ARRB2/METTL3/ADAR	8
BP	GO:0031103	axon regeneration	7/1464	52/18866	0.105552	0.936288	0.925132	CERS2/NDEL1/APOD/FOLR1/LRIG2/GAP43/STK24	7
BP	GO:0022406	membrane docking	19/1464	180/18866	0.105566	0.936288	0.925132	CEP192/KCNB1/STX16/PACS2/CEP70/STX17/RAB12/RALB/NPHP4/RAB3D/ATG14/HAUS5/TSNARE1/PRKACA/RAB8A/RAB3C/TTBK2/SFI1/ODF2	19
BP	GO:1901653	cellular response to peptide	38/1464	398/18866	0.107395	0.950993	0.939661	PDK4/TSC1/C2CD5/KLF2/SRSF5/LGMN/ARID1B/PRKCB/OGT/PKLR/ITGA4/FCGR2B/NDEL1/ABCC1/SERPINA12/RAB12/ADIPOQ/HSF1/CAPN10/GH2/SH2B2/MZB1/DDX11/SORBS1/ATP6V0A1/KLF15/PRKAR1B/NOD1/ZDHHC7/PRKACA/RAB8A/HDAC5/PTPN22/ADCY4/PDK2/ROCK2/STAT6/CPEB2	38
BP	GO:0072503	cellular divalent inorganic cation homeostasis	46/1464	492/18866	0.107653	0.951447	0.940109	CXCR4/SLC39A12/SLC25A23/ATP13A1/PTH1R/CCR7/GSTM2/GIPR/CCL13/PRKCB/PACS2/SMAD3/NOS1/ATP13A2/SLC39A10/P2RY1/ATP7B/TNNI3/NMUR2/MCOLN1/RMDN3/TPCN1/ABL1/P2RX1/CD38/ATF4/SLC35G1/ATP1A2/PLA2G6/CHRNA10/PML/S1PR4/TRPM7/KNG1/PRKACA/P2RY4/CCL8/PTGER2/DMPK/CACNB2/CXCL12/NPFF/AP3D1/CAPN3/LPAR3/CXCR2	46
BP	GO:0000209	protein polyubiquitination	33/1464	340/18866	0.107833	0.951447	0.940109	RNF135/UBE3A/TMEM129/CDC16/TRIM27/UNKL/TRIM22/RUSC1/UBR2/FBXW2/TRIM56/UBE4B/HECTD1/UBE2D4/FBXL20/TRAF5/MIB2/RNF146/MGRN1/PARP10/ZFP91/ERCC8/ANAPC13/TPP2/WSB1/PTPN22/UBR5/SHARPIN/DCAF15/RBBP6/PPIL2/FBXW12/FBXO31	33
BP	GO:0030258	lipid modification	27/1464	271/18866	0.108074	0.951447	0.940109	GBA2/INPP5E/PDK4/CPT1A/IVD/DGKA/IP6K2/DGKQ/ECI2/MTMR11/ACADVL/ACAT1/ECI1/ADIPOQ/ACACB/ILVBL/PIK3R6/IP6K1/APOD/CYP2C8/PLIN5/DGKD/DGKE/ECH1/ABCD4/PORCN/ECHDC2	27
BP	GO:0048041	focal adhesion assembly	10/1464	83/18866	0.108371	0.951447	0.940109	TSC1/BCR/PPM1F/HRG/SMAD3/ABL1/SORBS1/APOD/ROCK2/MYOC	10
BP	GO:0009648	photoperiodism	5/1464	33/18866	0.108691	0.951447	0.940109	RBM4/OPN5/PML/MTA1/CRY2	5
BP	GO:0015868	purine ribonucleotide transport	5/1464	33/18866	0.108691	0.951447	0.940109	SLC25A23/SLC25A36/SLC25A45/SLC25A42/SLC25A6	5
BP	GO:0046777	protein autophosphorylation	24/1464	237/18866	0.108712	0.951447	0.940109	EPHA8/BCR/WNK2/ULK3/CLK1/CLK2/EIF2AK1/ATP13A2/ADIPOQ/TESK1/CLK3/CSNK1G2/ABL1/TNK2/STK25/GRK1/TRPM7/CLK4/STK4/STK11/PRKACA/PPP2R5D/EIF2AK2/STK24	24
BP	GO:0046486	glycerolipid metabolic process	41/1464	434/18866	0.109854	0.951447	0.940109	INPP5E/CPT1A/CHKA/GPCPD1/PIGG/DGKA/IP6K2/DGKQ/PIGL/CPNE1/MTMR11/PNPLA1/OSBPL10/CHKB/THRSP/AVIL/SERPINA12/PIGS/MGLL/PIK3R6/FABP4/CSNK2B/IP6K1/PGP/PNPLA2/PIK3R5/LPCAT4/ATG14/PLA2G6/PCYT2/ETNK2/PLIN5/PCYT1A/DGKD/PIGB/DGKE/PLA2G15/ACP6/LMF1/SBF1/GPD1L	41
BP	GO:0001822	kidney development	28/1464	283/18866	0.109947	0.951447	0.940109	LAMA5/TSC1/SHH/TP73/CYP26A1/SMAD3/LZTS2/ACAT1/GPC3/BAG6/ADIPOQ/PTPRO/NPHP3/PGF/GDNF/ARID5B/KLF15/ALDH1A2/MPST/RET/DLL1/APH1A/HOXA11/LRP4/ANGPT1/MYC/CXCR2/GDF11	28
BP	GO:0032635	interleukin-6 production	18/1464	170/18866	0.110409	0.951447	0.940109	LILRA2/KLF2/MAPK13/NLRC3/HGF/C1QTNF3/MMP8/ARRB2/NLRP10/IL17D/TIRAP/SIGLEC16/NOD1/TICAM1/IL17A/PTPN22/MAVS/DHX9	18
BP	GO:0030183	B cell differentiation	15/1464	137/18866	0.110764	0.951447	0.940109	GON4L/ITGA4/FCGR2B/ITFG2/CARD11/POLM/ABL1/DCLRE1C/MFNG/DLL1/EP300/ZFP36L2/IFNA4/HDAC5/KLF6	15
BP	GO:0002438	acute inflammatory response to antigenic stimulus	4/1464	24/18866	0.110906	0.951447	0.940109	CCR7/FCGR2B/NPFF/CXCR2	4
BP	GO:0010640	regulation of platelet-derived growth factor receptor signaling pathway	4/1464	24/18866	0.110906	0.951447	0.940109	HIP1/ADIPOQ/APOD/LRIG2	4
BP	GO:0021904	dorsal/ventral neural tube patterning	4/1464	24/18866	0.110906	0.951447	0.940109	WDR19/SHH/PRKACA/TULP3	4
BP	GO:0033622	integrin activation	4/1464	24/18866	0.110906	0.951447	0.940109	MZB1/TLN1/PIEZO1/CXCL12	4
BP	GO:0034123	positive regulation of toll-like receptor signaling pathway	4/1464	24/18866	0.110906	0.951447	0.940109	FLOT1/TIRAP/RSAD2/PTPN22	4
BP	GO:0034143	regulation of toll-like receptor 4 signaling pathway	4/1464	24/18866	0.110906	0.951447	0.940109	LILRA2/DAB2IP/TIRAP/PTPN22	4
BP	GO:0034695	response to prostaglandin E	4/1464	24/18866	0.110906	0.951447	0.940109	CCR7/AKAP8/P2RY4/PTGER2	4
BP	GO:0070193	synaptonemal complex organization	4/1464	24/18866	0.110906	0.951447	0.940109	REC8/BAG6/AGO4/SYCP2	4
BP	GO:1900118	negative regulation of execution phase of apoptosis	4/1464	24/18866	0.110906	0.951447	0.940109	FZD3/DFFA/PAM16/CIDEA	4
BP	GO:0090114	COPII-coated vesicle budding	9/1464	73/18866	0.111039	0.951447	0.940109	SEC16B/GORASP1/SEC31B/SEC16A/SCAP/SEC22B/FOLR1/SEC24C/MIA3	9
BP	GO:0015849	organic acid transport	34/1464	353/18866	0.11214	0.956523	0.945126	SLC7A8/CPT1A/SLC25A20/SLC38A5/SLC7A6/FOLR2/PRKAB2/SLC25A45/SLC16A5/SFXN4/LLGL2/SLC38A1/THRSP/ABCC1/ATP8B1/SLC46A1/NMUR2/ACACB/SLC6A18/SLC43A1/SLC27A3/FABP4/LRRC8E/ATP1A2/PLA2G6/SLCO1A2/EMB/SLC38A7/FOLR1/PROCA1/SFXN5/HRH3/ABCD4/SLC7A4	34
BP	GO:0003009	skeletal muscle contraction	6/1464	43/18866	0.112968	0.956523	0.945126	CCDC78/RCSD1/GSTM2/KCNJ2/TNNI3/DMPK	6
BP	GO:0015804	neutral amino acid transport	6/1464	43/18866	0.112968	0.956523	0.945126	SLC7A8/SLC38A5/LLGL2/SLC38A1/SLC43A1/SLC38A7	6
BP	GO:0030808	regulation of nucleotide biosynthetic process	6/1464	43/18866	0.112968	0.956523	0.945126	PDK4/GUCA1C/NOS1/PDPR/ACMSD/PDK2	6
BP	GO:0050856	regulation of T cell receptor signaling pathway	6/1464	43/18866	0.112968	0.956523	0.945126	CCR7/CARD11/PVRIG/PTPN22/RPS3/CD300A	6
BP	GO:0090207	regulation of triglyceride metabolic process	6/1464	43/18866	0.112968	0.956523	0.945126	THRSP/SERPINA12/PNPLA2/ATG14/PLIN5/LMF1	6
BP	GO:0051893	regulation of focal adhesion assembly	8/1464	63/18866	0.113043	0.956523	0.945126	TSC1/PPM1F/HRG/SMAD3/ABL1/APOD/ROCK2/MYOC	8
BP	GO:0090109	regulation of cell-substrate junction assembly	8/1464	63/18866	0.113043	0.956523	0.945126	TSC1/PPM1F/HRG/SMAD3/ABL1/APOD/ROCK2/MYOC	8
BP	GO:0043434	response to peptide hormone	42/1464	447/18866	0.113295	0.956523	0.945126	SRSF6/PDK4/TSC1/C2CD5/TIMP4/VPS13C/SRSF5/ARID1B/PRKCB/OGT/PKLR/LRP5/NDEL1/SERPINA12/RAB12/ADIPOQ/HSF1/CAPN10/GH2/SH2B2/MZB1/RETN/STAT2/SORBS1/ATP6V0A1/KLF15/EIF2B4/TH/PRKAR1B/NPPA/SCAP/ZDHHC7/PRKACA/RAB8A/HDAC5/ADCY4/PDK2/ROCK2/CXCL12/STAT6/CPEB2/NR5A1	42
BP	GO:0008333	endosome to lysosome transport	7/1464	53/18866	0.113942	0.956523	0.945126	TRAK1/RAB12/HOOK2/ATG14/MGRN1/FAM160A2/VPS39	7
BP	GO:0043331	response to dsRNA	7/1464	53/18866	0.113942	0.956523	0.945126	ZCCHC3/FLOT1/RALB/TICAM1/IFNA4/MAVS/DHX9	7
BP	GO:0070838	divalent metal ion transport	44/1464	471/18866	0.114474	0.956523	0.945126	TMEM37/HOMER3/LILRA2/CXCR4/SLC39A12/SLC25A23/TRIM27/CCR7/ORAI2/EPB41/GSTM2/CAMK2G/CACNG6/PRKCB/NOS1/ZDHHC17/SLC39A10/ASIC1/KCNJ2/NMUR2/MCOLN1/TPCN1/ABL1/NIPA2/P2RX1/ARRB2/CATSPER3/SLC35G1/ATP1A2/PLA2G6/SLC39A2/CHRNA10/NPPA/PML/TRPM7/PRKACA/CACNA1H/BEST1/CCL8/CACNB2/CXCL12/CAPN3/BSPRY/LPAR3	44
BP	GO:0015749	monosaccharide transmembrane transport	13/1464	116/18866	0.11478	0.956523	0.945126	TERT/TSC1/C2CD5/PRKCB/GPC3/ADIPOQ/CAPN10/SORBS1/OCLN/KLF15/ZDHHC7/ARPP19/SIRT6	13
BP	GO:0030518	intracellular steroid hormone receptor signaling pathway	13/1464	116/18866	0.11478	0.956523	0.945126	UBE3A/DDX17/NCOR1/PPARGC1B/ARRB2/CALCOCO1/SAFB2/KMT2D/EP300/DAXX/FKBP4/UBR5/CRY2	13
BP	GO:0014031	mesenchymal cell development	10/1464	84/18866	0.114962	0.956523	0.945126	LAMA5/SHH/SEMA3G/GDNF/TAPT1/ALDH1A2/RET/SEMA3B/NOLC1/FOLR1	10
BP	GO:0015844	monoamine transport	10/1464	84/18866	0.114962	0.956523	0.945126	NISCH/SYT15/KCNB1/NOS1/P2RY1/GDNF/P2RX1/PICK1/HRH3/CXCL12	10
BP	GO:0006260	DNA replication	27/1464	273/18866	0.115133	0.956523	0.945126	THOC1/DNAJA3/BRPF3/ING5/INO80/CTC1/WRNIP1/RAD9A/EME2/EHMT2/RPA4/POLG/CHTF18/DDX11/GLI1/TICRR/KAT5/RECQL4/CCNE1/CDK9/SUPT16H/CORT/RBBP6/TBRG1/POLI/PIF1/DHX9	27
BP	GO:0046330	positive regulation of JNK cascade	15/1464	138/18866	0.115862	0.956523	0.945126	CCR7/FGD2/NOX1/MAP3K4/FCGR2B/MMP8/TRAF5/DAB2IP/EDA2R/TIRAP/TNFRSF19/NOD1/DAXX/MTURN/RPS3	15
BP	GO:0032147	activation of protein kinase activity	32/1464	331/18866	0.116068	0.956523	0.945126	MAP2K5/CXCR4/DGKQ/TP73/RICTOR/MAP3K4/HGF/ERP29/RPLP1/ABL1/DAB2IP/TAB1/PRR5/RET/PRKAR1B/TIRAP/GRM4/SPDYA/MAP3K1/ZFP91/NOD1/DAXX/STK4/STK11/PRKACA/ANGPT1/ADCY4/EIF2AK2/CD300A/RAF1/MADD/LPAR3	32
BP	GO:0060562	epithelial tube morphogenesis	32/1464	331/18866	0.116068	0.956523	0.945126	LAMA5/TSC1/CXCR4/KAT2A/DVL1/FZD3/SHH/LRP5L/SMAD3/LZTS2/SCRIB/PRICKLE1/GPC3/LRP5/MEGF8/NPHP3/ABL1/CSNK2B/PGF/GDNF/RET/PML/DLL1/STARD13/STK4/PRKACA/FOLR1/HOXA11/MYC/TULP3/SIRT6/CXCR2	32
BP	GO:2000116	regulation of cysteine-type endopeptidase activity	24/1464	239/18866	0.11632	0.956523	0.945126	HIP1/MAP2K5/IFI16/PPM1F/LGMN/SMAD3/GRAMD4/HGF/HSF1/NLRP1/P2RX1/ARRB2/MEFV/CASP10/CIDEB/PML/NOD1/MTCH1/RPS3/MYC/PIDD1/UACA/RAF1/XDH	24
BP	GO:0006986	response to unfolded protein	19/1464	183/18866	0.118675	0.956523	0.945126	TMEM129/CDK5RAP3/ACADVL/CXXC1/ARFGAP1/HSF1/DDX11/DAB2IP/HSPA6/ATF4/STT3B/CUL7/TLN1/EP300/TATDN2/DAXX/EIF2AK2/CREB3L2/ADD1	19
BP	GO:0001841	neural tube formation	12/1464	106/18866	0.119425	0.956523	0.945126	TSC1/KAT2A/DVL1/FZD3/SCRIB/PRICKLE1/NPHP3/ABL1/STK4/PRKACA/FOLR1/TULP3	12
BP	GO:0071156	regulation of cell cycle arrest	12/1464	106/18866	0.119425	0.956523	0.945126	UHRF2/PCBP4/TP73/DAB2IP/PML/MDM4/EP300/PRKACA/CDK9/PIDD1/MYBBP1A/RNF112	12
BP	GO:0009649	entrainment of circadian clock	5/1464	34/18866	0.11975	0.956523	0.945126	RBM4/OPN5/PML/MTA1/CRY2	5
BP	GO:0032814	regulation of natural killer cell activation	5/1464	34/18866	0.11975	0.956523	0.945126	RHBDD3/TICAM1/AXL/PTPN22/DCAF15	5
BP	GO:0033198	response to ATP	5/1464	34/18866	0.11975	0.956523	0.945126	DGKQ/PKLR/P2RY1/P2RX1/P2RY4	5
BP	GO:0036474	cell death in response to hydrogen peroxide	5/1464	34/18866	0.11975	0.956523	0.945126	HGF/TRAP1/STK25/PDE8A/RNF112	5
BP	GO:1902692	regulation of neuroblast proliferation	5/1464	34/18866	0.11975	0.956523	0.945126	FZD3/SHH/DCT/ZNF335/SIX3	5
BP	GO:0061572	actin filament bundle organization	17/1464	161/18866	0.120326	0.956523	0.945126	TSC1/AIF1L/PPM1F/ARHGEF18/SMAD3/PPP1R9A/ARHGEF15/TESK1/ABL1/PDLIM1/SORBS1/SHROOM1/FSCN3/PHACTR1/ROCK2/MYOC/ADD1	17
BP	GO:0042594	response to starvation	21/1464	206/18866	0.120712	0.956523	0.945126	PDK4/IFI16/FOXK1/HNRNPA1/ACAT1/SZT2/EIF2AK1/ITFG2/EHMT2/TNRC6A/SESN1/RALB/ATF4/ATG14/PICK1/TBC1D5/WDR59/EIF2AK2/DHODH/MYBBP1A/STK24	21
BP	GO:0035148	tube formation	16/1464	150/18866	0.120847	0.956523	0.945126	TSC1/KAT2A/DVL1/FZD3/SHH/SCRIB/PRICKLE1/NPHP3/ABL1/GDNF/DAB2IP/RET/STK4/PRKACA/FOLR1/TULP3	16
BP	GO:0009584	detection of visible light	8/1464	64/18866	0.120932	0.956523	0.945126	GUCA1C/OPN5/CCDC66/GPR52/GRK1/RGS9BP/BEST1/OPN4	8
BP	GO:1901862	negative regulation of muscle tissue development	8/1464	64/18866	0.120932	0.956523	0.945126	SOX6/RBP4/SHH/JARID2/TP73/USP19/DLL1/LUC7L	8
BP	GO:0072089	stem cell proliferation	14/1464	128/18866	0.121008	0.956523	0.945126	TERT/YJEFN3/FZD3/SHH/DCT/WNT10B/CTC1/NUMB/ZNF335/CCNE1/KCNA1/EIF2AK2/SIX3/SIRT6	14
BP	GO:0043401	steroid hormone mediated signaling pathway	15/1464	139/18866	0.121097	0.956523	0.945126	UBE3A/DDX17/NCOR1/PPARGC1B/RXRB/ARRB2/CALCOCO1/NR2C1/SAFB2/KMT2D/EP300/DAXX/FKBP4/UBR5/CRY2	15
BP	GO:0000245	spliceosomal complex assembly	10/1464	85/18866	0.121772	0.956523	0.945126	SRSF6/SRSF5/RBM5/CELF6/LUC7L3/SETX/SF1/LUC7L/PRPF39/SRPK1	10
BP	GO:0006767	water-soluble vitamin metabolic process	10/1464	85/18866	0.121772	0.956523	0.945126	FOLR2/MMACHC/ABCC1/SLC46A1/MCCC2/MCCC1/FOLR1/ABCD4/CD320/CTRB2	10
BP	GO:0031110	regulation of microtubule polymerization or depolymerization	10/1464	85/18866	0.121772	0.956523	0.945126	GBA2/SLC39A12/STMN3/NUMA1/ABL1/OCLN/PSRC1/FKBP4/TTBK2/RPS3	10
BP	GO:0000394	RNA splicing, via endonucleolytic cleavage and ligation	3/1464	16/18866	0.122458	0.956523	0.945126	TSEN54/TSEN2/TSEN34	3
BP	GO:0001780	neutrophil homeostasis	3/1464	16/18866	0.122458	0.956523	0.945126	MPL/AXL/CXCR2	3
BP	GO:0006086	acetyl-CoA biosynthetic process from pyruvate	3/1464	16/18866	0.122458	0.956523	0.945126	PDK4/PDPR/PDK2	3
BP	GO:0006103	2-oxoglutarate metabolic process	3/1464	16/18866	0.122458	0.956523	0.945126	ADHFE1/D2HGDH/OGDH	3
BP	GO:0009129	pyrimidine nucleoside monophosphate metabolic process	3/1464	16/18866	0.122458	0.956523	0.945126	UCKL1/DCTD/DHODH	3
BP	GO:0014061	regulation of norepinephrine secretion	3/1464	16/18866	0.122458	0.956523	0.945126	KCNB1/P2RY1/HRH3	3
BP	GO:0021534	cell proliferation in hindbrain	3/1464	16/18866	0.122458	0.956523	0.945126	RERE/SHH/GLI1	3
BP	GO:0031573	intra-S DNA damage checkpoint	3/1464	16/18866	0.122458	0.956523	0.945126	RAD9A/EME2/MDC1	3
BP	GO:0032225	regulation of synaptic transmission, dopaminergic	3/1464	16/18866	0.122458	0.956523	0.945126	FLOT1/GDNF/ARRB2	3
BP	GO:0034310	primary alcohol catabolic process	3/1464	16/18866	0.122458	0.956523	0.945126	SULT1A2/SULT1A1/SULT1C4	3
BP	GO:0042074	cell migration involved in gastrulation	3/1464	16/18866	0.122458	0.956523	0.945126	GPC3/LRP5/MEGF8	3
BP	GO:0043249	erythrocyte maturation	3/1464	16/18866	0.122458	0.956523	0.945126	BRD1/KLF2/L3MBTL3	3
BP	GO:0043252	sodium-independent organic anion transport	3/1464	16/18866	0.122458	0.956523	0.945126	MFSD10/SLCO1A2/SLCO6A1	3
BP	GO:0050965	detection of temperature stimulus involved in sensory perception of pain	3/1464	16/18866	0.122458	0.956523	0.945126	CXCR4/ARRB2/CXCL12	3
BP	GO:0070863	positive regulation of protein exit from endoplasmic reticulum	3/1464	16/18866	0.122458	0.956523	0.945126	TM9SF4/SEC16B/SEC16A	3
BP	GO:0071380	cellular response to prostaglandin E stimulus	3/1464	16/18866	0.122458	0.956523	0.945126	AKAP8/P2RY4/PTGER2	3
BP	GO:0071871	response to epinephrine	3/1464	16/18866	0.122458	0.956523	0.945126	PKLR/ADIPOQ/PRKACA	3
BP	GO:0031050	dsRNA processing	7/1464	54/18866	0.122669	0.956523	0.945126	TERT/SMAD3/NCOR1/AGO4/METTL3/ADAR/SRRT	7
BP	GO:0032623	interleukin-2 production	7/1464	54/18866	0.122669	0.956523	0.945126	HOMER3/VSIG4/TRIM27/CARD11/KAT5/RPS3/SPTBN1	7
BP	GO:0070918	production of small RNA involved in gene silencing by RNA	7/1464	54/18866	0.122669	0.956523	0.945126	TERT/SMAD3/NCOR1/AGO4/METTL3/ADAR/SRRT	7
BP	GO:0006904	vesicle docking involved in exocytosis	6/1464	44/18866	0.122725	0.956523	0.945126	KCNB1/RAB12/RALB/RAB3D/RAB8A/RAB3C	6
BP	GO:0030835	negative regulation of actin filament depolymerization	6/1464	44/18866	0.122725	0.956523	0.945126	AVIL/TRIOBP/PLEKHH2/FLII/SPTBN1/ADD1	6
BP	GO:0046328	regulation of JNK cascade	19/1464	184/18866	0.123253	0.956523	0.945126	CCR7/FGD2/NOX1/MAP3K4/NCOR1/AMBP/FCGR2B/MMP8/TRAF5/DAB2IP/EDA2R/TIRAP/TNFRSF19/NPPA/NOD1/DAXX/MTURN/PTPN22/RPS3	19
BP	GO:0007623	circadian rhythm	22/1464	218/18866	0.123508	0.956523	0.945126	UBE3A/CPT1A/RBM4/OPN5/USP7/OGT/NCOR1/ADIPOQ/SETX/ATF4/TH/PML/EP300/METTL3/MTA1/CRY2/CIPC/ROCK2/SIX3/KMT2A/MYBBP1A/OPN4	22
BP	GO:0019693	ribose phosphate metabolic process	40/1464	427/18866	0.123545	0.956523	0.945126	UCKL1/NUDT3/PDK4/SULT1A2/ADPGK/DHTKD1/FOXK1/SULT1A1/OGT/ACSS1/PKLR/ACAT1/NCOR1/PDPR/DCAKD/CARD11/PANK4/SULT1C4/ACACB/SLC4A1/POM121/PDE2A/NPPA/MCCC2/ACOT6/OGDH/EP300/FASN/ACSBG2/ENO3/PDE8A/ADCY4/PDK2/ATP6/PRPS1L1/DHODH/PDE5A/TECR/PDE7A/SIRT6	40
BP	GO:0016236	macroautophagy	30/1464	310/18866	0.123596	0.956523	0.945126	TBC1D14/TSC1/MFSD8/ATG16L2/CALCOCO2/VPS36/VPS13C/PRKAB2/PACS2/ATP13A2/STX17/RAB12/MCOLN1/CSNK2B/TECPR1/ATP6V0A1/TOMM40/SESN1/RALB/ATG14/POLDIP2/UFC1/TBC1D5/NOD1/SEC22B/ATG2A/PRKACA/CDC37/USP36/ATG16L1	30
BP	GO:0021700	developmental maturation	28/1464	287/18866	0.124183	0.956523	0.945126	GLDN/EPHA8/RERE/C1QA/BRD1/PTH1R/KLF2/WNT10B/REC8/PABPC1L/ARHGEF15/FEV/DAB2IP/ALDH1A2/CATSPER3/RET/PICK1/KCNIP2/L3MBTL3/CDC25B/BCAN/MTCH1/AXL/PRKACA/SIX3/AP3D1/MYOC/GDF11	28
BP	GO:0002092	positive regulation of receptor internalization	4/1464	25/18866	0.12436	0.956523	0.945126	ARRB2/PICK1/TBC1D5/ANGPT1	4
BP	GO:0007530	sex determination	4/1464	25/18866	0.12436	0.956523	0.945126	ZNF445/MAP3K4/SF1/NR5A1	4
BP	GO:0015874	norepinephrine transport	4/1464	25/18866	0.12436	0.956523	0.945126	NISCH/KCNB1/P2RY1/HRH3	4
BP	GO:0032647	regulation of interferon-alpha production	4/1464	25/18866	0.12436	0.956523	0.945126	NLRC3/IRF7/MAVS/DHX9	4
BP	GO:0034162	toll-like receptor 9 signaling pathway	4/1464	25/18866	0.12436	0.956523	0.945126	UNC93B1/GRAMD4/RSAD2/PTPN22	4
BP	GO:0042537	benzene-containing compound metabolic process	4/1464	25/18866	0.12436	0.956523	0.945126	GSTM2/GSTM4/GSTM1/TH	4
BP	GO:0062149	detection of stimulus involved in sensory perception of pain	4/1464	25/18866	0.12436	0.956523	0.945126	CXCR4/ARRB2/KCNA1/CXCL12	4
BP	GO:0071677	positive regulation of mononuclear cell migration	4/1464	25/18866	0.12436	0.956523	0.945126	LGMN/DEFB124/CCL27/CXCL12	4
BP	GO:0043266	regulation of potassium ion transport	12/1464	107/18866	0.12558	0.959961	0.948522	WNK2/NOS1/KCNJ2/KCNIP3/ATF4/DPP6/KCNIP2/NPPA/KCNS1/KCNAB2/KCNA1/ATP1B2	12
BP	GO:0006353	DNA-templated transcription, termination	9/1464	75/18866	0.125661	0.959961	0.948522	SYMPK/PCF11/TAF1D/PABPN1/SETX/PAPOLA/ERCC3/POLR1A/DHX9	9
BP	GO:0099518	vesicle cytoskeletal trafficking	9/1464	75/18866	0.125661	0.959961	0.948522	MYO19/TRAK1/MYO5C/MYO1G/NDEL1/KIF5A/STK11/MYO7B/AP3D1	9
BP	GO:0009259	ribonucleotide metabolic process	39/1464	416/18866	0.125935	0.959961	0.948522	UCKL1/NUDT3/PDK4/SULT1A2/ADPGK/DHTKD1/FOXK1/SULT1A1/OGT/ACSS1/PKLR/ACAT1/NCOR1/PDPR/DCAKD/CARD11/PANK4/SULT1C4/ACACB/SLC4A1/POM121/PDE2A/NPPA/MCCC2/ACOT6/OGDH/EP300/FASN/ACSBG2/ENO3/PDE8A/ADCY4/PDK2/ATP6/DHODH/PDE5A/TECR/PDE7A/SIRT6	39
BP	GO:0000077	DNA damage checkpoint	16/1464	151/18866	0.125997	0.959961	0.948522	THOC1/PCBP4/CDK5RAP3/RAD9A/GIGYF2/EME2/RPA4/UIMC1/MDC1/PML/MDM4/TICRR/EP300/PPP1R10/PIDD1/FBXO31	16
BP	GO:0046474	glycerophospholipid biosynthetic process	23/1464	230/18866	0.126041	0.959961	0.948522	INPP5E/CHKA/PIGG/DGKA/DGKQ/PIGL/CPNE1/CHKB/PIGS/PIK3R6/CSNK2B/PIK3R5/LPCAT4/PLA2G6/PCYT2/ETNK2/PCYT1A/DGKD/PIGB/DGKE/ACP6/SBF1/GPD1L	23
BP	GO:0098657	import into cell	23/1464	230/18866	0.126041	0.959961	0.948522	SLC7A8/SLC29A2/SLC39A12/WNK2/FOLR2/ITGA4/SCRIB/NOS1/SLC38A1/SLC39A10/SLC12A9/SLC46A1/KCNJ2/SLC43A1/FLOT1/GDNF/KCNK9/ATP1A2/NUMB/SLC12A4/FOLR1/MX2/ATP1B2	23
BP	GO:0006805	xenobiotic metabolic process	13/1464	118/18866	0.126361	0.959961	0.948522	SULT1A2/GSTM2/SULT1A1/CYP26A1/CMBL/GSTM4/GSTM1/AS3MT/CYP2A6/CYP2C9/CYP2C8/AOC2/CYP2A7	13
BP	GO:0034219	carbohydrate transmembrane transport	13/1464	118/18866	0.126361	0.959961	0.948522	TERT/TSC1/C2CD5/PRKCB/GPC3/ADIPOQ/CAPN10/SORBS1/OCLN/KLF15/ZDHHC7/ARPP19/SIRT6	13
BP	GO:0071482	cellular response to light stimulus	14/1464	129/18866	0.126618	0.960606	0.94916	GUCA1C/OPN5/ACTR5/MAPK13/INO80/GPR52/ATF4/GRK1/EP300/METTL3/STK11/CRY2/MYC/OPN4	14
BP	GO:0051056	regulation of small GTPase mediated signal transduction	31/1464	323/18866	0.128467	0.972063	0.96048	ITSN1/BCR/ARHGEF17/STMN3/FGD2/RHOT2/ARHGEF18/RALGAPB/OGT/ARFGAP1/DENND4B/ABL1/FLOT1/RALBP1/LZTR1/DAB2IP/LRRC59/STK19/RASAL1/PSD4/RGL2/EPOR/GARNL3/RASGRP4/STARD13/ARHGAP17/FGD3/RAF1/MADD/MYOC/ARHGEF16	31
BP	GO:0006919	activation of cysteine-type endopeptidase activity involved in apoptotic process	10/1464	86/18866	0.128798	0.972063	0.96048	HIP1/SMAD3/NLRP1/P2RX1/CASP10/PML/NOD1/MTCH1/PIDD1/XDH	10
BP	GO:0070664	negative regulation of leukocyte proliferation	10/1464	86/18866	0.128798	0.972063	0.96048	VSIG4/MAD1L1/CLEC4G/SHH/SCRIB/FCGR2B/CCL8/VTCN1/CD300A/PDE5A	10
BP	GO:0060675	ureteric bud morphogenesis	8/1464	65/18866	0.129103	0.972063	0.96048	LAMA5/SHH/LZTS2/GPC3/PGF/GDNF/HOXA11/MYC	8
BP	GO:0090181	regulation of cholesterol metabolic process	8/1464	65/18866	0.129103	0.972063	0.96048	DGKQ/ACADVL/SERPINA12/ACACB/NFYC/SCAP/FASN/LMF1	8
BP	GO:0032200	telomere organization	18/1464	174/18866	0.129209	0.972063	0.96048	TERT/TELO2/USP7/RAD51D/CTC1/HNRNPA1/HMBOX1/MAP3K4/PARP3/DCLRE1C/HNRNPC/PML/RECQL4/CCNE1/MYC/PPP1R10/PIF1/SIRT6	18
BP	GO:0043903	regulation of symbiotic process	23/1464	231/18866	0.130267	0.972063	0.96048	OAS1/OAS2/CXCR4/IFI16/TRIM27/TRIM22/SETDB1/TRIM25/NELFCD/ISG15/PARP10/RSAD2/PML/EP300/BST2/OASL/CDK9/CCL8/ADAR/MAVS/EIF2AK2/SRPK1/DHX9	23
BP	GO:0021915	neural tube development	17/1464	163/18866	0.130335	0.972063	0.96048	TSC1/KAT2A/DVL1/FZD3/WDR19/SHH/SCRIB/PRICKLE1/NPHP3/ABL1/ALDH1A2/ITPK1/IFT140/STK4/PRKACA/FOLR1/TULP3	17
BP	GO:0045926	negative regulation of growth	25/1464	254/18866	0.130418	0.972063	0.96048	RBP4/IP6K2/ING5/JARID2/TP73/LGMN/HRG/TCHP/SMAD3/CAPRIN2/GPC3/JADE1/SEMA3G/BBS2/SERTAD3/CCDC85B/PSRC1/SEMA3B/NPPA/PML/STK4/STK11/BST2/FXN/BMP10	25
BP	GO:0042100	B cell proliferation	11/1464	97/18866	0.130782	0.972063	0.96048	FCGR2B/CARD11/SLC39A10/MZB1/ABL1/CD38/TIRAP/TICAM1/IFNA4/CD320/CD300A	11
BP	GO:0006369	termination of RNA polymerase II transcription	5/1464	35/18866	0.131312	0.972063	0.96048	SYMPK/PCF11/PABPN1/SETX/PAPOLA	5
BP	GO:0031297	replication fork processing	5/1464	35/18866	0.131312	0.972063	0.96048	THOC1/EME2/DDX11/CDK9/CORT	5
BP	GO:0042462	eye photoreceptor cell development	5/1464	35/18866	0.131312	0.972063	0.96048	TUG1/TH/RPGRIP1/RDH13/CABP4	5
BP	GO:0044743	protein transmembrane import into intracellular organelle	5/1464	35/18866	0.131312	0.972063	0.96048	CHCHD4/TOMM40/GRPEL1/PAM16/TIMM23B	5
BP	GO:0001954	positive regulation of cell-matrix adhesion	7/1464	55/18866	0.131727	0.972063	0.96048	TSC1/CCR7/PPM1F/HRG/SMAD3/ABL1/MYOC	7
BP	GO:0008347	glial cell migration	7/1464	55/18866	0.131727	0.972063	0.96048	SUN1/SYNE2/CERS2/SCRIB/P2RY1/DAB2IP/ATP1B2	7
BP	GO:0022029	telencephalon cell migration	7/1464	55/18866	0.131727	0.972063	0.96048	SUN1/CXCR4/SYNE2/NDEL1/DAB2IP/EFHC1/CXCL12	7
BP	GO:0050879	multicellular organismal movement	7/1464	55/18866	0.131727	0.972063	0.96048	CCDC78/RCSD1/GSTM2/GIGYF2/KCNJ2/TNNI3/DMPK	7
BP	GO:0050881	musculoskeletal movement	7/1464	55/18866	0.131727	0.972063	0.96048	CCDC78/RCSD1/GSTM2/GIGYF2/KCNJ2/TNNI3/DMPK	7
BP	GO:0032508	DNA duplex unwinding	12/1464	108/18866	0.13191	0.972063	0.96048	CHD2/WRNIP1/CHTF18/DDX11/SETX/CHD1L/SUPV3L1/ERCC3/ERCC8/RECQL4/PIF1/DHX9	12
BP	GO:0001889	liver development	15/1464	141/18866	0.131974	0.972063	0.96048	SRSF5/JARID2/CDK5RAP3/LIMS2/SMAD3/ACAT1/HGF/UPF2/NPHP3/CSNK2B/ARID5B/ALDH1A2/MPST/RHBDD3/GLI1	15
BP	GO:0009581	detection of external stimulus	15/1464	141/18866	0.131974	0.972063	0.96048	CXCR4/GUCA1C/OPN5/CCDC66/GPR52/ARRB2/GRK1/CHRNA10/RGS9BP/PIEZO1/BEST1/KCNA1/CXCL12/CABP4/OPN4	15
BP	GO:0009410	response to xenobiotic stimulus	14/1464	130/18866	0.132374	0.972551	0.960962	SULT1A2/GSTM2/SULT1A1/CYP26A1/CMBL/GSTM4/GSTM1/AS3MT/RHBDD3/CYP2A6/CYP2C9/CYP2C8/AOC2/CYP2A7	14
BP	GO:0010822	positive regulation of mitochondrion organization	13/1464	119/18866	0.13239	0.972551	0.960962	HPS4/VPS13C/TP73/ZDHHC6/ADCK1/MIEF1/PPP3CC/UBL4B/PLA2G6/ABLIM3/CIDEB/CDC37/USP36	13
BP	GO:0032722	positive regulation of chemokine production	6/1464	45/18866	0.13288	0.973092	0.961496	ADIPOQ/DEFB124/TIRAP/IL17A/MAVS/EIF2AK2	6
BP	GO:0034198	cellular response to amino acid starvation	6/1464	45/18866	0.13288	0.973092	0.961496	SZT2/ITFG2/SESN1/ATF4/WDR59/EIF2AK2	6
BP	GO:0006163	purine nucleotide metabolic process	41/1464	442/18866	0.133279	0.973092	0.961496	NUDT3/PDK4/GUCA1C/SULT1A2/ADPGK/DHTKD1/FOXK1/SULT1A1/OGT/ACSS1/PKLR/ACAT1/NCOR1/NOS1/PDPR/DCAKD/CARD11/PANK4/SULT1C4/ACACB/SLC4A1/POM121/PDE2A/NPPA/MCCC2/ACOT6/OGDH/EP300/FASN/ACSBG2/ENO3/PDE8A/ADCY4/PDK2/ATP6/PRPS1L1/PDE5A/TECR/PDE7A/SIRT6/XDH	41
BP	GO:0009583	detection of light stimulus	9/1464	76/18866	0.133339	0.973092	0.961496	GUCA1C/OPN5/CCDC66/GPR52/GRK1/RGS9BP/BEST1/CABP4/OPN4	9
BP	GO:0072091	regulation of stem cell proliferation	9/1464	76/18866	0.133339	0.973092	0.961496	TERT/FZD3/SHH/DCT/ZNF335/CCNE1/EIF2AK2/SIX3/SIRT6	9
BP	GO:0050804	modulation of chemical synaptic transmission	42/1464	454/18866	0.133733	0.974595	0.962982	BCR/KAT2A/DVL1/NISCH/SHISA9/KCNB1/NAPB/LGMN/YTHDF1/PRKCB/PPP1R9A/FBXL20/NCSTN/ASIC1/P2RY1/ADIPOQ/RETN/ABL1/FLOT1/GDNF/P2RX1/DLGAP4/CD38/ATF4/ARRB2/ATP1A2/PLA2G6/PICK1/PRKAR1B/GRM4/SYN3/GIT1/CA7/STXBP5L/PRKACA/RAB8A/P2RY4/DGKE/VAMP1/DMPK/CACNB2/SHISA6	42
BP	GO:0007269	neurotransmitter secretion	18/1464	175/18866	0.134185	0.974595	0.962982	DVL1/NAPB/PRKCB/SCRIB/PPP1R9A/FBXL20/ASIC1/P2RY1/P2RX1/GRM4/SYN3/GIT1/STXBP5L/P2RY4/DNAJC5/VAMP1/HRH3/CACNB2	18
BP	GO:0099643	signal release from synapse	18/1464	175/18866	0.134185	0.974595	0.962982	DVL1/NAPB/PRKCB/SCRIB/PPP1R9A/FBXL20/ASIC1/P2RY1/P2RX1/GRM4/SYN3/GIT1/STXBP5L/P2RY4/DNAJC5/VAMP1/HRH3/CACNB2	18
BP	GO:0010976	positive regulation of neuron projection development	28/1464	290/18866	0.135573	0.974595	0.962982	GOLGA4/ITSN1/CXCR4/TRAK1/DVL1/PARP6/CBFA2T2/SS18L1/CAPRIN2/HGF/PPP1R9A/NDEL1/AVIL/ZFYVE27/MEGF8/SETX/DAB2IP/STK25/RASAL1/RET/CUL7/EP300/STK11/CXCL12/CREB3L2/ATP1B2/LPAR3/FBXO31	28
BP	GO:0048732	gland development	41/1464	443/18866	0.13641	0.974595	0.962982	LAMA5/OAS2/UBE3A/HOXA3/MAD1L1/SHH/MST1/SRSF5/JARID2/CDK5RAP3/LRP5L/CTC1/LIMS2/SMAD3/SCRIB/ACAT1/HGF/UPF2/LRP5/HOXB9/ATP7B/RREB1/NPHP3/ABL1/CSNK2B/ARID5B/ALDH1A2/MPST/RHBDD3/PITX1/GLI1/PML/FASN/STK11/FKBP4/STAT6/DHODH/SIX3/RAF1/NR5A1/XDH	41
BP	GO:0099177	regulation of trans-synaptic signaling	42/1464	455/18866	0.136829	0.974595	0.962982	BCR/KAT2A/DVL1/NISCH/SHISA9/KCNB1/NAPB/LGMN/YTHDF1/PRKCB/PPP1R9A/FBXL20/NCSTN/ASIC1/P2RY1/ADIPOQ/RETN/ABL1/FLOT1/GDNF/P2RX1/DLGAP4/CD38/ATF4/ARRB2/ATP1A2/PLA2G6/PICK1/PRKAR1B/GRM4/SYN3/GIT1/CA7/STXBP5L/PRKACA/RAB8A/P2RY4/DGKE/VAMP1/DMPK/CACNB2/SHISA6	42
BP	GO:0070482	response to oxygen levels	37/1464	396/18866	0.137481	0.974595	0.962982	TERT/TSC1/CXCR4/HIF3A/TM9SF4/NOX1/PKLR/SMAD3/NOS1/POLG/ADIPOQ/HSF1/MPL/DNMT3B/PDLIM1/PGF/ND4/CD38/ATF4/USP19/TH/PICK1/NPPA/ERCC3/PML/MDM4/SCAP/EP300/PLEKHN1/ALAS2/ROCK2/CXCL12/ATP6/HIF1AN/MYC/CPEB2/RAF1	37
BP	GO:0006360	transcription by RNA polymerase I	8/1464	66/18866	0.137551	0.974595	0.962982	DHX33/TAF1D/DDX11/ATF4/ERCC3/POLR1A/RRN3P2/BAZ2A	8
BP	GO:0072171	mesonephric tubule morphogenesis	8/1464	66/18866	0.137551	0.974595	0.962982	LAMA5/SHH/LZTS2/GPC3/PGF/GDNF/HOXA11/MYC	8
BP	GO:0150116	regulation of cell-substrate junction organization	8/1464	66/18866	0.137551	0.974595	0.962982	TSC1/PPM1F/HRG/SMAD3/ABL1/APOD/ROCK2/MYOC	8
BP	GO:0007224	smoothened signaling pathway	15/1464	142/18866	0.137614	0.974595	0.962982	WDR19/SHH/ULK3/WNT10B/WDR11/GPC3/STK36/MEGF8/MGRN1/GLI1/IFT140/PRKACA/SCUBE3/TTBK2/TULP3	15
BP	GO:0001657	ureteric bud development	11/1464	98/18866	0.137633	0.974595	0.962982	LAMA5/SHH/SMAD3/LZTS2/GPC3/PGF/GDNF/RET/HOXA11/MYC/GDF11	11
BP	GO:0014020	primary neural tube formation	11/1464	98/18866	0.137633	0.974595	0.962982	TSC1/KAT2A/DVL1/FZD3/SCRIB/PRICKLE1/NPHP3/ABL1/PRKACA/FOLR1/TULP3	11
BP	GO:0006766	vitamin metabolic process	14/1464	131/18866	0.138275	0.974595	0.962982	FOLR2/CYP26A1/LGMN/PLTP/MMACHC/ABCC1/SLC46A1/ALDH1A2/MCCC2/MCCC1/FOLR1/ABCD4/CD320/CTRB2	14
BP	GO:0010884	positive regulation of lipid storage	4/1464	26/18866	0.138464	0.974595	0.962982	ACACB/PLIN5/FITM1/CIDEA	4
BP	GO:0030206	chondroitin sulfate biosynthetic process	4/1464	26/18866	0.138464	0.974595	0.962982	B3GALT6/CHST12/BCAN/NCAN	4
BP	GO:0034114	regulation of heterotypic cell-cell adhesion	4/1464	26/18866	0.138464	0.974595	0.962982	MAP2K5/FGB/ADIPOQ/FLOT1	4
BP	GO:0051016	barbed-end actin filament capping	4/1464	26/18866	0.138464	0.974595	0.962982	AVIL/TRIOBP/FLII/ADD1	4
BP	GO:0060765	regulation of androgen receptor signaling pathway	4/1464	26/18866	0.138464	0.974595	0.962982	NCOR1/ARRB2/SAFB2/EP300	4
BP	GO:0070129	regulation of mitochondrial translation	4/1464	26/18866	0.138464	0.974595	0.962982	UQCC1/NGRN/CDK5RAP1/ALKBH1	4
BP	GO:0071425	hematopoietic stem cell proliferation	4/1464	26/18866	0.138464	0.974595	0.962982	YJEFN3/WNT10B/CTC1/EIF2AK2	4
BP	GO:1901018	positive regulation of potassium ion transmembrane transporter activity	4/1464	26/18866	0.138464	0.974595	0.962982	KCNIP2/NPPA/KCNA1/ATP1B2	4
BP	GO:0006874	cellular calcium ion homeostasis	42/1464	456/18866	0.139968	0.974595	0.962982	CXCR4/SLC25A23/ATP13A1/PTH1R/CCR7/GSTM2/GIPR/CCL13/PRKCB/PACS2/SMAD3/NOS1/ATP13A2/P2RY1/ATP7B/TNNI3/NMUR2/MCOLN1/RMDN3/TPCN1/ABL1/P2RX1/CD38/ATF4/SLC35G1/ATP1A2/PLA2G6/CHRNA10/PML/S1PR4/KNG1/PRKACA/P2RY4/CCL8/PTGER2/DMPK/CACNB2/CXCL12/NPFF/CAPN3/LPAR3/CXCR2	42
BP	GO:0006895	Golgi to endosome transport	3/1464	17/18866	0.140555	0.974595	0.962982	MON2/VPS13C/CORO7	3
BP	GO:0006896	Golgi to vacuole transport	3/1464	17/18866	0.140555	0.974595	0.962982	VPS52/ANKFY1/AP3D1	3
BP	GO:0009048	dosage compensation by inactivation of X chromosome	3/1464	17/18866	0.140555	0.974595	0.962982	RBM15B/PRDM14/METTL3	3
BP	GO:0014067	negative regulation of phosphatidylinositol 3-kinase signaling	3/1464	17/18866	0.140555	0.974595	0.962982	INPP5E/NLRC3/DAB2IP	3
BP	GO:0015693	magnesium ion transport	3/1464	17/18866	0.140555	0.974595	0.962982	ZDHHC17/KCNJ2/NIPA2	3
BP	GO:0016254	preassembly of GPI anchor in ER membrane	3/1464	17/18866	0.140555	0.974595	0.962982	PIGG/PIGL/PIGB	3
BP	GO:0031000	response to caffeine	3/1464	17/18866	0.140555	0.974595	0.962982	GSTM2/DNMT3B/DHODH	3
BP	GO:0031065	positive regulation of histone deacetylation	3/1464	17/18866	0.140555	0.974595	0.962982	CTBP1/AKAP8L/AKAP8	3
BP	GO:0032695	negative regulation of interleukin-12 production	3/1464	17/18866	0.140555	0.974595	0.962982	CCR7/ARRB2/MEFV	3
BP	GO:0035020	regulation of Rac protein signal transduction	3/1464	17/18866	0.140555	0.974595	0.962982	STMN3/OGT/ARHGAP17	3
BP	GO:0035461	vitamin transmembrane transport	3/1464	17/18866	0.140555	0.974595	0.962982	FOLR2/SLC46A1/FOLR1	3
BP	GO:0042953	lipoprotein transport	3/1464	17/18866	0.140555	0.974595	0.962982	PRKCB/ZDHHC17/MIA3	3
BP	GO:0046068	cGMP metabolic process	3/1464	17/18866	0.140555	0.974595	0.962982	PDE2A/NPPA/PDE5A	3
BP	GO:0061158	3'-UTR-mediated mRNA destabilization	3/1464	17/18866	0.140555	0.974595	0.962982	DND1/ZFP36L2/PLEKHN1	3
BP	GO:0070131	positive regulation of mitochondrial translation	3/1464	17/18866	0.140555	0.974595	0.962982	UQCC1/NGRN/CDK5RAP1	3
BP	GO:0098962	regulation of postsynaptic neurotransmitter receptor activity	3/1464	17/18866	0.140555	0.974595	0.962982	SHISA9/DLGAP4/SHISA6	3
BP	GO:1903818	positive regulation of voltage-gated potassium channel activity	3/1464	17/18866	0.140555	0.974595	0.962982	KCNIP2/NPPA/KCNA1	3
BP	GO:0001755	neural crest cell migration	7/1464	56/18866	0.141107	0.975991	0.964361	LAMA5/SHH/SEMA3G/GDNF/RET/SEMA3B/FOLR1	7
BP	GO:1902017	regulation of cilium assembly	7/1464	56/18866	0.141107	0.975991	0.964361	WRAP73/SYNE2/TCHP/CDK10/RABEP2/TAPT1/IFT140	7
BP	GO:0048193	Golgi vesicle transport	35/1464	374/18866	0.143006	0.978783	0.96712	TBC1D14/GOLGA4/COG8/SEC16B/VPS52/MON2/VPS13C/LMAN1L/GORASP1/SEC31B/SGSM2/KIF5A/ANKFY1/ARFGAP1/STX17/PITPNB/NUMA1/BBS2/COG3/ERGIC3/SEC16A/PICK1/GGA1/SCAP/SEC22B/FOLR1/RAB8A/TEX261/CORO7/CREB3L2/LMF1/SEC24C/MIA3/SPTBN1/AP3D1	35
BP	GO:0002755	MyD88-dependent toll-like receptor signaling pathway	5/1464	36/18866	0.143355	0.978783	0.96712	TAB1/TIRAP/IRF7/MAP3K1/CD300A	5
BP	GO:0006007	glucose catabolic process	5/1464	36/18866	0.143355	0.978783	0.96712	ADPGK/FOXK1/PKLR/LRP5/ENO3	5
BP	GO:0018345	protein palmitoylation	5/1464	36/18866	0.143355	0.978783	0.96712	ZDHHC6/ZDHHC17/ZDHHC8/ZDHHC7/PORCN	5
BP	GO:0051294	establishment of spindle orientation	5/1464	36/18866	0.143355	0.978783	0.96712	LLGL2/NDEL1/INSC/SAPCD2/NUMA1	5
BP	GO:2000781	positive regulation of double-strand break repair	5/1464	36/18866	0.143355	0.978783	0.96712	PARP3/DDX11/SPIDR/MMS19/FUS	5
BP	GO:0072006	nephron development	15/1464	143/18866	0.143386	0.978783	0.96712	LAMA5/SHH/LZTS2/ACAT1/GPC3/ADIPOQ/PTPRO/PGF/GDNF/KLF15/RET/DLL1/HOXA11/ANGPT1/MYC	15
BP	GO:0032007	negative regulation of TOR signaling	6/1464	46/18866	0.14342	0.978783	0.96712	TSC1/UBR2/SZT2/ITFG2/SESN1/STK11	6
BP	GO:0061028	establishment of endothelial barrier	6/1464	46/18866	0.14342	0.978783	0.96712	IKBKB/PDE2A/TJP3/FASN/ROCK2/ADD1	6
BP	GO:1900744	regulation of p38MAPK cascade	6/1464	46/18866	0.14342	0.978783	0.96712	MAP3K4/HGF/DAB2IP/PTPN22/RELL2/XDH	6
BP	GO:0060249	anatomical structure homeostasis	43/1464	469/18866	0.143447	0.978783	0.96712	TERT/PDK4/TELO2/PTH1R/RBP4/USP7/RAD51D/CTC1/HNRNPA1/GIGYF2/HMBOX1/MAP3K4/P2RY1/PPARGC1B/CCDC66/PARP3/BBS2/NPHP3/ANKRD11/DCLRE1C/TJP3/P2RX1/OCLN/CD38/NPHP4/RAB3D/HNRNPC/PML/PRDM14/RECQL4/STK11/P2RY4/CCNE1/ANGPT1/CACNB2/MTF1/MYC/PPP1R10/ATP1B2/CAPN3/PIF1/SIRT6/ADD1	43
BP	GO:0060070	canonical Wnt signaling pathway	32/1464	339/18866	0.144175	0.982319	0.970614	DVL1/FZD3/DAAM2/WNK2/SHH/WNT10B/FRAT2/SMAD3/LZTS2/PRICKLE1/CAPRIN2/GPC3/JADE1/LRP5/JRK/PTPRO/CCDC88C/CSNK1G2/NPHP3/DAB2IP/NPHP4/RNF146/GLI1/TLE2/STK4/STK11/FOLR1/LRP4/UBR5/LYPD6/PORCN/SHISA6	32
BP	GO:0007044	cell-substrate junction assembly	11/1464	99/18866	0.144672	0.982319	0.970614	TSC1/BCR/PPM1F/HRG/SMAD3/ABL1/SORBS1/APOD/TLN1/ROCK2/MYOC	11
BP	GO:0072163	mesonephric epithelium development	11/1464	99/18866	0.144672	0.982319	0.970614	LAMA5/SHH/SMAD3/LZTS2/GPC3/PGF/GDNF/RET/HOXA11/MYC/GDF11	11
BP	GO:0072164	mesonephric tubule development	11/1464	99/18866	0.144672	0.982319	0.970614	LAMA5/SHH/SMAD3/LZTS2/GPC3/PGF/GDNF/RET/HOXA11/MYC/GDF11	11
BP	GO:0016079	synaptic vesicle exocytosis	13/1464	121/18866	0.144919	0.982711	0.971001	DVL1/NAPB/PRKCB/SCRIB/FBXL20/P2RY1/P2RX1/GIT1/STXBP5L/P2RY4/DNAJC5/VAMP1/CACNB2	13
BP	GO:0007041	lysosomal transport	12/1464	110/18866	0.145083	0.982711	0.971001	TRAK1/VPS52/ATP13A2/ANKFY1/RAB12/NUMA1/HOOK2/ATG14/MGRN1/FAM160A2/VPS39/AP3D1	12
BP	GO:0009582	detection of abiotic stimulus	15/1464	144/18866	0.14929	0.992895	0.981064	CXCR4/GUCA1C/OPN5/CCDC66/GPR52/ARRB2/GRK1/CHRNA10/RGS9BP/PIEZO1/BEST1/KCNA1/CXCL12/CABP4/OPN4	15
BP	GO:0061008	hepaticobiliary system development	15/1464	144/18866	0.14929	0.992895	0.981064	SRSF5/JARID2/CDK5RAP3/LIMS2/SMAD3/ACAT1/HGF/UPF2/NPHP3/CSNK2B/ARID5B/ALDH1A2/MPST/RHBDD3/GLI1	15
BP	GO:0106106	cold-induced thermogenesis	15/1464	144/18866	0.14929	0.992895	0.981064	CXCR4/WNT10B/PRKAB2/OGT/PPARGC1B/NOVA2/ADIPOQ/HSF1/FABP4/IP6K1/ATF4/STK11/STAT6/CIDEA/SIRT6	15
BP	GO:0120161	regulation of cold-induced thermogenesis	15/1464	144/18866	0.14929	0.992895	0.981064	CXCR4/WNT10B/PRKAB2/OGT/PPARGC1B/NOVA2/ADIPOQ/HSF1/FABP4/IP6K1/ATF4/STK11/STAT6/CIDEA/SIRT6	15
BP	GO:0030433	ubiquitin-dependent ERAD pathway	9/1464	78/18866	0.149405	0.992895	0.981064	TMEM129/ANKZF1/TMUB2/UBE4B/TRIM25/BAG6/MAN1B1/USP19/STT3B	9
BP	GO:0042177	negative regulation of protein catabolic process	14/1464	133/18866	0.150504	0.992895	0.981064	TIMP4/SHH/CDK5RAP3/USP7/OGT/SMAD3/BAG6/ATP13A2/DAB2IP/USP19/SNRNP70/PML/MDM4/LRIG2	14
BP	GO:0072175	epithelial tube formation	14/1464	133/18866	0.150504	0.992895	0.981064	TSC1/KAT2A/DVL1/FZD3/SCRIB/PRICKLE1/NPHP3/ABL1/GDNF/RET/STK4/PRKACA/FOLR1/TULP3	14
BP	GO:0031099	regeneration	20/1464	201/18866	0.150559	0.992895	0.981064	CERS2/SRSF5/WNT10B/HGF/UPF2/NDEL1/TM4SF4/CSNK2B/PGF/APOD/GLI1/EPPK1/AXL/FOLR1/ENO3/LRIG2/CXCL12/GAP43/STK24/CAPN3	20
BP	GO:0042743	hydrogen peroxide metabolic process	7/1464	57/18866	0.150799	0.992895	0.981064	HBB/NOX1/GPX3/HBD/MPO/MPV17L/DUOX2	7
BP	GO:0044380	protein localization to cytoskeleton	7/1464	57/18866	0.150799	0.992895	0.981064	DVL1/WRAP73/CEP192/KLHL21/NUMA1/KIAA0753/TTBK2	7
BP	GO:0050432	catecholamine secretion	7/1464	57/18866	0.150799	0.992895	0.981064	NISCH/SYT15/KCNB1/P2RY1/GDNF/HRH3/CXCL12	7
BP	GO:0060760	positive regulation of response to cytokine stimulus	7/1464	57/18866	0.150799	0.992895	0.981064	CXCR4/CPNE1/IRF7/AXL/ZBP1/MAVS/DHX9	7
BP	GO:0014033	neural crest cell differentiation	10/1464	89/18866	0.151146	0.992895	0.981064	LAMA5/SHH/SEMA3G/GDNF/TAPT1/ALDH1A2/RET/SEMA3B/NOLC1/FOLR1	10
BP	GO:0010811	positive regulation of cell-substrate adhesion	13/1464	122/18866	0.151414	0.992895	0.981064	TSC1/CCR7/PPM1F/FGB/HRG/LIMS2/SMAD3/RREB1/ABL1/TRIOBP/STK4/RELL2/MYOC	13
BP	GO:0019058	viral life cycle	32/1464	341/18866	0.151784	0.992895	0.981064	SIGLEC1/CD209/OAS1/OAS2/CXCR4/ATG16L2/IFI16/CTBP1/TRIM27/CLEC4G/TRIM22/MRC1/SETDB1/TRIM25/CLEC4M/POM121/MVB12B/ISG15/PARP10/RSAD2/PML/AXL/BST2/OASL/CCL8/ATG16L1/CLDN6/ADAR/MAVS/ROCK2/EIF2AK2/SRPK1	32
BP	GO:0036503	ERAD pathway	11/1464	100/18866	0.151895	0.992895	0.981064	TMEM129/ANKZF1/TMUB2/UBE4B/TRIM25/BAG6/GET4/MAN1B1/USP19/HM13/STT3B	11
BP	GO:0007254	JNK cascade	21/1464	213/18866	0.153103	0.992895	0.981064	CCR7/SH2D3A/FGD2/NOX1/MAP3K4/NCOR1/AMBP/FCGR2B/MMP8/TRAF5/DAB2IP/EDA2R/TAB1/TIRAP/TNFRSF19/NPPA/NOD1/DAXX/MTURN/PTPN22/RPS3	21
BP	GO:0001963	synaptic transmission, dopaminergic	4/1464	27/18866	0.153172	0.992895	0.981064	FLOT1/GDNF/ARRB2/TH	4
BP	GO:0006735	NADH regeneration	4/1464	27/18866	0.153172	0.992895	0.981064	ADPGK/FOXK1/PKLR/ENO3	4
BP	GO:0006779	porphyrin-containing compound biosynthetic process	4/1464	27/18866	0.153172	0.992895	0.981064	PPOX/RSAD1/FXN/ALAS2	4
BP	GO:0009651	response to salt stress	4/1464	27/18866	0.153172	0.992895	0.981064	SLC25A23/TH/EFHD1/CAPN3	4
BP	GO:0032607	interferon-alpha production	4/1464	27/18866	0.153172	0.992895	0.981064	NLRC3/IRF7/MAVS/DHX9	4
BP	GO:0033014	tetrapyrrole biosynthetic process	4/1464	27/18866	0.153172	0.992895	0.981064	PPOX/RSAD1/FXN/ALAS2	4
BP	GO:0034243	regulation of transcription elongation from RNA polymerase II promoter	4/1464	27/18866	0.153172	0.992895	0.981064	CDK13/SHH/NELFCD/SUPT16H	4
BP	GO:0035459	vesicle cargo loading	4/1464	27/18866	0.153172	0.992895	0.981064	SEC31B/SCAP/SEC24C/MIA3	4
BP	GO:0045672	positive regulation of osteoclast differentiation	4/1464	27/18866	0.153172	0.992895	0.981064	SLC9B2/PPARGC1B/IL17A/IL20	4
BP	GO:0061621	canonical glycolysis	4/1464	27/18866	0.153172	0.992895	0.981064	ADPGK/FOXK1/PKLR/ENO3	4
BP	GO:0061718	glucose catabolic process to pyruvate	4/1464	27/18866	0.153172	0.992895	0.981064	ADPGK/FOXK1/PKLR/ENO3	4
BP	GO:0072337	modified amino acid transport	4/1464	27/18866	0.153172	0.992895	0.981064	FOLR2/ABCC1/SLC46A1/FOLR1	4
BP	GO:0090140	regulation of mitochondrial fission	4/1464	27/18866	0.153172	0.992895	0.981064	MYO19/MIEF1/STAT2/DHODH	4
BP	GO:1904357	negative regulation of telomere maintenance via telomere lengthening	4/1464	27/18866	0.153172	0.992895	0.981064	CTC1/HNRNPA1/HNRNPC/PIF1	4
BP	GO:0030902	hindbrain development	16/1464	156/18866	0.153612	0.992895	0.981064	RERE/KAT2A/SHH/SCRIB/FCGR2B/NCSTN/B4GALT2/ABL1/ND4/ALDH1A2/GLI1/DLL1/COX1/TTBK2/SDF4/ATP1B2	16
BP	GO:0006378	mRNA polyadenylation	6/1464	47/18866	0.154329	0.992895	0.981064	SYMPK/PABPC1L/PCF11/HSF1/PAPOLA/CDK9	6
BP	GO:0032480	negative regulation of type I interferon production	6/1464	47/18866	0.154329	0.992895	0.981064	RNF135/NLRC3/TRIM25/CACTIN/ISG15/MAVS	6
BP	GO:0043268	positive regulation of potassium ion transport	6/1464	47/18866	0.154329	0.992895	0.981064	WNK2/KCNJ2/KCNIP2/NPPA/KCNA1/ATP1B2	6
BP	GO:0032868	response to insulin	27/1464	283/18866	0.154655	0.992895	0.981064	SRSF6/PDK4/TSC1/C2CD5/VPS13C/SRSF5/PRKCB/OGT/PKLR/NDEL1/SERPINA12/RAB12/ADIPOQ/CAPN10/SH2B2/MZB1/RETN/SORBS1/ATP6V0A1/KLF15/NPPA/SCAP/ZDHHC7/RAB8A/HDAC5/PDK2/CPEB2	27
BP	GO:0009150	purine ribonucleotide metabolic process	37/1464	401/18866	0.154879	0.992895	0.981064	NUDT3/PDK4/SULT1A2/ADPGK/DHTKD1/FOXK1/SULT1A1/OGT/ACSS1/PKLR/ACAT1/NCOR1/PDPR/DCAKD/CARD11/PANK4/SULT1C4/ACACB/SLC4A1/POM121/PDE2A/NPPA/MCCC2/ACOT6/OGDH/EP300/FASN/ACSBG2/ENO3/PDE8A/ADCY4/PDK2/ATP6/PDE5A/TECR/PDE7A/SIRT6	37
BP	GO:0016239	positive regulation of macroautophagy	8/1464	68/18866	0.155251	0.992895	0.981064	TSC1/CALCOCO2/VPS13C/RAB12/SESN1/RALB/NOD1/CDC37	8
BP	GO:0006882	cellular zinc ion homeostasis	5/1464	37/18866	0.155854	0.992895	0.981064	SLC39A12/ATP13A2/SLC39A10/ATP7B/AP3D1	5
BP	GO:0033120	positive regulation of RNA splicing	5/1464	37/18866	0.155854	0.992895	0.981064	SRSF5/SETX/U2AF2/SNRNP70/DAZAP1	5
BP	GO:0062208	positive regulation of pattern recognition receptor signaling pathway	5/1464	37/18866	0.155854	0.992895	0.981064	ZCCHC3/FLOT1/TIRAP/RSAD2/PTPN22	5
BP	GO:0060828	regulation of canonical Wnt signaling pathway	28/1464	295/18866	0.155898	0.992895	0.981064	DVL1/DAAM2/WNK2/SHH/WNT10B/SMAD3/LZTS2/PRICKLE1/CAPRIN2/GPC3/JADE1/JRK/PTPRO/CCDC88C/CSNK1G2/NPHP3/DAB2IP/NPHP4/RNF146/GLI1/TLE2/STK4/STK11/FOLR1/LRP4/UBR5/LYPD6/SHISA6	28
BP	GO:0034754	cellular hormone metabolic process	14/1464	134/18866	0.156829	0.992895	0.981064	ADH1B/RBP4/SHH/DGKQ/HSD17B7/SULT1A1/CYP26A1/PNPLA2/ALDH1A2/CYP2C9/CYP2C8/RETSAT/CACNA1H/RDH13	14
BP	GO:0045995	regulation of embryonic development	14/1464	134/18866	0.156829	0.992895	0.981064	LAMA5/MAP2K5/DVL1/FZD3/SHH/NR2C2/BAG6/ADIPOQ/NPHP3/GDNF/DLL1/STK4/PRKACA/TULP3	14
BP	GO:0050672	negative regulation of lymphocyte proliferation	9/1464	79/18866	0.157784	0.992895	0.981064	VSIG4/MAD1L1/CLEC4G/SHH/SCRIB/FCGR2B/VTCN1/CD300A/PDE5A	9
BP	GO:0071466	cellular response to xenobiotic stimulus	13/1464	123/18866	0.15806	0.992895	0.981064	SULT1A2/GSTM2/SULT1A1/CYP26A1/CMBL/GSTM4/GSTM1/AS3MT/CYP2A6/CYP2C9/CYP2C8/AOC2/CYP2A7	13
BP	GO:0031331	positive regulation of cellular catabolic process	36/1464	390/18866	0.158091	0.992895	0.981064	TSC1/CPT1A/DVL1/CALCOCO2/TRIM27/VPS13C/TRIM22/YTHDF1/DXO/GIGYF2/PRICKLE1/BAG6/RAB12/TRIB2/HSF1/OSBPL7/DND1/TNRC6A/TPCN1/DAB2IP/PNPLA2/SESN1/RALB/MEFV/SUPV3L1/PLIN5/NOD1/TICAM1/KAT5/ZFP36L2/METTL3/STK11/PLEKHN1/CDC37/ROCK2/SIRT6	36
BP	GO:0098773	skin epidermis development	10/1464	90/18866	0.159005	0.992895	0.981064	LAMA5/FZD3/SHH/WNT10B/DNASE1L2/NUMA1/TNFRSF19/DLL1/MYSM1/LRP4	10
BP	GO:0015908	fatty acid transport	11/1464	101/18866	0.1593	0.992895	0.981064	CPT1A/SLC25A20/PRKAB2/THRSP/NMUR2/ACACB/SLC27A3/FABP4/PLA2G6/PROCA1/ABCD4	11
BP	GO:0019217	regulation of fatty acid metabolic process	11/1464	101/18866	0.1593	0.992895	0.981064	PDK4/CPT1A/PRKAB2/ACADVL/NCOR1/PDPR/ADIPOQ/ACACB/PLIN5/SCAP/PDK2	11
BP	GO:0045639	positive regulation of myeloid cell differentiation	11/1464	101/18866	0.1593	0.992895	0.981064	SLC9B2/BRD1/PPARGC1B/MPL/ISG15/FAXDC2/ANKRD54/IL17A/MTURN/ACIN1/IL20	11
BP	GO:0006491	N-glycan processing	3/1464	18/18866	0.159475	0.992895	0.981064	MAN2A2/MAN1B1/MGAT4B	3
BP	GO:0006883	cellular sodium ion homeostasis	3/1464	18/18866	0.159475	0.992895	0.981064	ATP1A2/ATP1B2/C7	3
BP	GO:0017121	plasma membrane phospholipid scrambling	3/1464	18/18866	0.159475	0.992895	0.981064	XKR8/XKR6/SLC4A1	3
BP	GO:0032780	negative regulation of ATPase activity	3/1464	18/18866	0.159475	0.992895	0.981064	TSC1/TNNI3/PAM16	3
BP	GO:0033194	response to hydroperoxide	3/1464	18/18866	0.159475	0.992895	0.981064	GPX3/CD38/RNF112	3
BP	GO:0034199	activation of protein kinase A activity	3/1464	18/18866	0.159475	0.992895	0.981064	PRKAR1B/PRKACA/ADCY4	3
BP	GO:0034755	iron ion transmembrane transport	3/1464	18/18866	0.159475	0.992895	0.981064	SLC40A1/MCOLN1/SLC25A37	3
BP	GO:0044872	lipoprotein localization	3/1464	18/18866	0.159475	0.992895	0.981064	PRKCB/ZDHHC17/MIA3	3
BP	GO:0050961	detection of temperature stimulus involved in sensory perception	3/1464	18/18866	0.159475	0.992895	0.981064	CXCR4/ARRB2/CXCL12	3
BP	GO:0051571	positive regulation of histone H3-K4 methylation	3/1464	18/18866	0.159475	0.992895	0.981064	RTF1/DNMT3B/KMT2A	3
BP	GO:0051923	sulfation	3/1464	18/18866	0.159475	0.992895	0.981064	SULT1A2/SULT1A1/SULT1C4	3
BP	GO:0061298	retina vasculature development in camera-type eye	3/1464	18/18866	0.159475	0.992895	0.981064	LRP5L/ARHGEF15/LRP5	3
BP	GO:0071605	monocyte chemotactic protein-1 production	3/1464	18/18866	0.159475	0.992895	0.981064	C1QTNF3/ADIPOQ/APOD	3
BP	GO:0071637	regulation of monocyte chemotactic protein-1 production	3/1464	18/18866	0.159475	0.992895	0.981064	C1QTNF3/ADIPOQ/APOD	3
BP	GO:0090036	regulation of protein kinase C signaling	3/1464	18/18866	0.159475	0.992895	0.981064	PLA2G6/DGKD/GPD1L	3
BP	GO:1905276	regulation of epithelial tube formation	3/1464	18/18866	0.159475	0.992895	0.981064	DVL1/NPHP3/GDNF	3
BP	GO:2000303	regulation of ceramide biosynthetic process	3/1464	18/18866	0.159475	0.992895	0.981064	NSMAF/PLA2G6/ORMDL1	3
BP	GO:2001020	regulation of response to DNA damage stimulus	22/1464	226/18866	0.160257	0.992895	0.981064	THOC1/RAD52/WRNIP1/RAD9A/HSF1/PARP3/DDX11/ABL1/SPIDR/UIMC1/MMS19/PML/ERCC8/FUS/RPS3/CDK9/UBR5/CXCL12/MYC/PPP1R10/SIRT6/DHX9	22
BP	GO:1901796	regulation of signal transduction by p53 class mediator	18/1464	180/18866	0.16068	0.992895	0.981064	L3MBTL1/ING5/CDK5RAP3/RRS1/TP73/PRKAB2/RAD9A/MEAF6/EHMT2/CSNK2B/NOP2/PML/MDM4/KAT5/EP300/STK11/SUPT16H/TAF6	18
BP	GO:0002886	regulation of myeloid leukocyte mediated immunity	7/1464	58/18866	0.160791	0.992895	0.981064	BCR/DNASE1/FCGR2B/NPPA/TICAM1/MAVS/CD300A	7
BP	GO:0043489	RNA stabilization	7/1464	58/18866	0.160791	0.992895	0.981064	DND1/GDNF/TIRAP/HNRNPC/FUS/BOLL/DHX9	7
BP	GO:1902373	negative regulation of mRNA catabolic process	7/1464	58/18866	0.160791	0.992895	0.981064	DND1/GDNF/TIRAP/HNRNPC/FUS/BOLL/DHX9	7
BP	GO:0006401	RNA catabolic process	38/1464	415/18866	0.162486	0.992895	0.981064	OAS2/PCBP4/PAN2/PATL2/DIS3L/EDC4/GTPBP2/YTHDF1/DXO/ZCCHC8/GIGYF2/UPF2/FASTKD1/RPLP1/EXOSC6/DND1/TNRC6A/AGO4/RPS28/RNASE2/GDNF/UPF3A/RPS17/TIRAP/SUPV3L1/HNRNPC/FASTK/RPL38/ZFP36L2/METTL3/FUS/PLEKHN1/EXOSC7/RPS3/ROCK2/RNH1/BOLL/DHX9	38
BP	GO:0022604	regulation of cell morphogenesis	45/1464	499/18866	0.163202	0.992895	0.981064	GOLGA4/COCH/CXCR4/TRAK1/UBE3A/DVL1/PARP6/DNMBP/FGD2/SS18L1/EPB41/FGB/YTHDF1/CCL13/ARHGEF18/GORASP1/LIMS2/STRIP1/CAPRIN2/PPP1R9A/SEMA3G/NDEL1/P2RY1/RREB1/ZFYVE27/PTPRO/ZSWIM8/MEGF8/MPL/AGO4/ABL1/ITGA7/STK25/RASAL1/RET/SEMA3B/CUL7/TRIOBP/STK11/LRP4/CXCL12/FGD3/MYOC/LPAR3/FBXO31	45
BP	GO:0007004	telomere maintenance via telomerase	8/1464	69/18866	0.164487	0.992895	0.981064	TERT/TELO2/CTC1/HNRNPA1/HMBOX1/MAP3K4/HNRNPC/PIF1	8
BP	GO:0032784	regulation of DNA-templated transcription, elongation	6/1464	48/18866	0.165591	0.992895	0.981064	THOC1/CDK13/SHH/SETD5/NELFCD/SUPT16H	6
BP	GO:0043631	RNA polyadenylation	6/1464	48/18866	0.165591	0.992895	0.981064	SYMPK/PABPC1L/PCF11/HSF1/PAPOLA/CDK9	6
BP	GO:0051972	regulation of telomerase activity	6/1464	48/18866	0.165591	0.992895	0.981064	HMBOX1/MAP3K4/PARP3/PARP4/MYC/PIF1	6
BP	GO:1990928	response to amino acid starvation	6/1464	48/18866	0.165591	0.992895	0.981064	SZT2/ITFG2/SESN1/ATF4/WDR59/EIF2AK2	6
BP	GO:1903510	mucopolysaccharide metabolic process	12/1464	113/18866	0.166091	0.992895	0.981064	ABCC5/B4GALT3/NDST3/ST3GAL3/HGF/B3GALT6/B4GALT2/IDUA/CHST12/BCAN/ANGPT1/NCAN	12
BP	GO:0000280	nuclear division	39/1464	428/18866	0.166356	0.992895	0.981064	MAU2/SUN1/C11orf80/WRAP73/SH2B1/L3MBTL1/CDC16/CEP192/KIFC2/MAD1L1/CDK13/MSTO1/NEK9/UBR2/KNTC1/RRS1/REC8/INO80/PRKCB/RAD51D/EME2/POGZ/LRP5/BAG6/NDEL1/HSF1/NUMA1/AGO4/SYCP2/AKAP8L/PSRC1/CUL7/CDC25B/SPDYA/AKAP8/CCNE1/HORMAD2/CORT/KNSTRN	39
BP	GO:0002312	B cell activation involved in immune response	9/1464	80/18866	0.166384	0.992895	0.981064	THOC1/FCGR2B/ITFG2/EXOSC6/PARP3/ABL1/MFNG/DLL1/STAT6	9
BP	GO:0009988	cell-cell recognition	9/1464	80/18866	0.166384	0.992895	0.981064	CD209/HVCN1/CCR7/FOLR2/OVGP1/CLEC4M/CATSPER3/FOLR1/UBAP2L	9
BP	GO:0032945	negative regulation of mononuclear cell proliferation	9/1464	80/18866	0.166384	0.992895	0.981064	VSIG4/MAD1L1/CLEC4G/SHH/SCRIB/FCGR2B/VTCN1/CD300A/PDE5A	9
BP	GO:0150115	cell-substrate junction organization	11/1464	102/18866	0.166881	0.992895	0.981064	TSC1/BCR/PPM1F/HRG/SMAD3/ABL1/SORBS1/APOD/TLN1/ROCK2/MYOC	11
BP	GO:0015914	phospholipid transport	10/1464	91/18866	0.16706	0.992895	0.981064	OSBPL2/XKR8/PLTP/OSBPL10/ABCC1/XKR6/ATP8B1/PITPNB/SLC4A1/CPTP	10
BP	GO:0051492	regulation of stress fiber assembly	10/1464	91/18866	0.16706	0.992895	0.981064	TSC1/PPM1F/ARHGEF18/SMAD3/PPP1R9A/ARHGEF15/TESK1/ABL1/ROCK2/MYOC	10
BP	GO:0060333	interferon-gamma-mediated signaling pathway	10/1464	91/18866	0.16706	0.992895	0.981064	OAS1/OAS2/TRIM22/CAMK2G/IRF9/TRIM25/PML/IRF7/CDC37/OASL	10
BP	GO:1901379	regulation of potassium ion transmembrane transport	10/1464	91/18866	0.16706	0.992895	0.981064	WNK2/KCNJ2/KCNIP3/DPP6/KCNIP2/NPPA/KCNS1/KCNAB2/KCNA1/ATP1B2	10
BP	GO:0002335	mature B cell differentiation	4/1464	28/18866	0.168436	0.992895	0.981064	FCGR2B/ITFG2/MFNG/DLL1	4
BP	GO:0032958	inositol phosphate biosynthetic process	4/1464	28/18866	0.168436	0.992895	0.981064	PTH1R/IP6K2/P2RY1/IP6K1	4
BP	GO:0061620	glycolytic process through glucose-6-phosphate	4/1464	28/18866	0.168436	0.992895	0.981064	ADPGK/FOXK1/PKLR/ENO3	4
BP	GO:0006361	transcription initiation from RNA polymerase I promoter	5/1464	38/18866	0.168782	0.992895	0.981064	TAF1D/ERCC3/POLR1A/RRN3P2/BAZ2A	5
BP	GO:0019433	triglyceride catabolic process	5/1464	38/18866	0.168782	0.992895	0.981064	PNPLA1/MGLL/FABP4/PNPLA2/PLIN5	5
BP	GO:0030224	monocyte differentiation	5/1464	38/18866	0.168782	0.992895	0.981064	IFI16/IRF7/FASN/ACIN1/MYC	5
BP	GO:1903131	mononuclear cell differentiation	5/1464	38/18866	0.168782	0.992895	0.981064	IFI16/IRF7/FASN/ACIN1/MYC	5
BP	GO:0034599	cellular response to oxidative stress	29/1464	310/18866	0.169778	0.992895	0.981064	TSC1/ANKZF1/KLF2/RAD52/MAPK13/NOX1/GPX3/SZT2/HGF/ATP13A2/PPARGC1B/HSF1/ZNF580/ABL1/TRAP1/MPO/SETX/ATF4/STK25/PML/AXL/RPS3/FXN/PDE8A/PDK2/STAT6/CPEB2/STK24/RNF112	29
BP	GO:0050671	positive regulation of lymphocyte proliferation	14/1464	136/18866	0.169887	0.992895	0.981064	CD209/DNAJA3/SHH/CARD11/SLC39A10/MPL/CD38/TIRAP/ZNF335/TICAM1/PTPN22/RPS3/VTCN1/CD320	14
BP	GO:0001658	branching involved in ureteric bud morphogenesis	7/1464	59/18866	0.171074	0.992895	0.981064	LAMA5/SHH/GPC3/PGF/GDNF/HOXA11/MYC	7
BP	GO:0042306	regulation of protein import into nucleus	7/1464	59/18866	0.171074	0.992895	0.981064	SHH/SMAD3/APOD/NOLC1/ANGPT1/UBR5/MAVS	7
BP	GO:0090316	positive regulation of intracellular protein transport	18/1464	182/18866	0.172013	0.992895	0.981064	C2CD5/HPS4/TM9SF4/SEC16B/SHH/KCNB1/TP73/SMAD3/MTCL1/MIEF1/PPP3CC/UBL4B/SEC16A/ABLIM3/PRKACA/USP36/UBR5/MAVS	18
BP	GO:0032386	regulation of intracellular transport	33/1464	358/18866	0.172294	0.992895	0.981064	C2CD5/HPS4/TM9SF4/SEC16B/RBM4/SHH/KCNB1/TP73/SMAD3/MTCL1/NDEL1/ATP13A2/ADIPOQ/MIEF1/PPP3CC/NUMA1/CAPN10/UBL4B/APOD/SEC16A/XPO5/AKAP8L/ABLIM3/NOLC1/STK11/PRKACA/MX2/USP36/ANGPT1/UBR5/MAVS/PTPN23/DHX9	33
BP	GO:0001823	mesonephros development	11/1464	103/18866	0.174637	0.992895	0.981064	LAMA5/SHH/SMAD3/LZTS2/GPC3/PGF/GDNF/RET/HOXA11/MYC/GDF11	11
BP	GO:1902115	regulation of organelle assembly	19/1464	194/18866	0.174645	0.992895	0.981064	TBC1D14/KAT2A/WRAP73/SYNE2/PAN2/PATL2/LRFN4/TCHP/CDK10/NUMA1/RABEP2/TAPT1/RALB/IFT140/LRFN1/SEC22B/BMP10/GAP43/MYLK3	19
BP	GO:0034644	cellular response to UV	9/1464	81/18866	0.1752	0.992895	0.981064	OPN5/ACTR5/MAPK13/INO80/ATF4/EP300/METTL3/STK11/MYC	9
BP	GO:0048194	Golgi vesicle budding	9/1464	81/18866	0.1752	0.992895	0.981064	SEC16B/GORASP1/SEC31B/SEC16A/SCAP/SEC22B/FOLR1/SEC24C/MIA3	9
BP	GO:0003333	amino acid transmembrane transport	10/1464	92/18866	0.175308	0.992895	0.981064	SLC7A8/SLC38A5/SLC7A6/SLC38A1/SLC6A18/SLC43A1/LRRC8E/ATP1A2/SLC38A7/SLC7A4	10
BP	GO:0051648	vesicle localization	22/1464	229/18866	0.175441	0.992895	0.981064	MYO19/TRAK1/SEC16B/MYO5C/TPGS1/GORASP1/MYO1G/WDR11/ITGA4/SCRIB/NDEL1/KIF5A/BBS2/SEC16A/SYN3/SEC22B/STK11/FOLR1/MX2/MYO7B/SEC24C/AP3D1	22
BP	GO:0032946	positive regulation of mononuclear cell proliferation	14/1464	137/18866	0.176617	0.992895	0.981064	CD209/DNAJA3/SHH/CARD11/SLC39A10/MPL/CD38/TIRAP/ZNF335/TICAM1/PTPN22/RPS3/VTCN1/CD320	14
BP	GO:0036293	response to decreased oxygen levels	34/1464	371/18866	0.176746	0.992895	0.981064	TERT/TSC1/CXCR4/HIF3A/TM9SF4/PKLR/SMAD3/NOS1/ADIPOQ/HSF1/MPL/DNMT3B/PDLIM1/PGF/ND4/CD38/ATF4/USP19/TH/PICK1/NPPA/ERCC3/PML/MDM4/SCAP/EP300/PLEKHN1/ALAS2/ROCK2/CXCL12/HIF1AN/MYC/CPEB2/RAF1	34
BP	GO:0007129	homologous chromosome pairing at meiosis	6/1464	49/18866	0.177189	0.992895	0.981064	SUN1/REC8/BAG6/AGO4/SYCP2/CCNE1	6
BP	GO:0018198	peptidyl-cysteine modification	6/1464	49/18866	0.177189	0.992895	0.981064	ZDHHC6/NOS1/CHCHD4/ZDHHC8/RAB3D/ZDHHC7	6
BP	GO:0032527	protein exit from endoplasmic reticulum	6/1464	49/18866	0.177189	0.992895	0.981064	TM9SF4/SEC16B/TMEM129/NUMA1/SEC16A/HM13	6
BP	GO:0035196	production of miRNAs involved in gene silencing by miRNA	6/1464	49/18866	0.177189	0.992895	0.981064	SMAD3/NCOR1/AGO4/METTL3/ADAR/SRRT	6
BP	GO:0045058	T cell selection	6/1464	49/18866	0.177189	0.992895	0.981064	CCR7/SHH/CARD11/SLAMF6/STK11/STAT6	6
BP	GO:0061383	trabecula morphogenesis	6/1464	49/18866	0.177189	0.992895	0.981064	SLC40A1/RBP4/WNT10B/UBE4B/PPARGC1B/BMP10	6
BP	GO:0090199	regulation of release of cytochrome c from mitochondria	6/1464	49/18866	0.177189	0.992895	0.981064	HGF/ARRB2/PLA2G6/CIDEB/FXN/PAM16	6
BP	GO:0001553	luteinization	2/1464	10/18866	0.179026	0.992895	0.981064	RETN/NR5A1	2
BP	GO:0002524	hypersensitivity	2/1464	10/18866	0.179026	0.992895	0.981064	CCR7/FCGR2B	2
BP	GO:0006222	UMP biosynthetic process	2/1464	10/18866	0.179026	0.992895	0.981064	UCKL1/DHODH	2
BP	GO:0007440	foregut morphogenesis	2/1464	10/18866	0.179026	0.992895	0.981064	SHH/SMAD3	2
BP	GO:0009173	pyrimidine ribonucleoside monophosphate metabolic process	2/1464	10/18866	0.179026	0.992895	0.981064	UCKL1/DHODH	2
BP	GO:0009174	pyrimidine ribonucleoside monophosphate biosynthetic process	2/1464	10/18866	0.179026	0.992895	0.981064	UCKL1/DHODH	2
BP	GO:0010603	regulation of cytoplasmic mRNA processing body assembly	2/1464	10/18866	0.179026	0.992895	0.981064	PAN2/PATL2	2
BP	GO:0010998	regulation of translational initiation by eIF2 alpha phosphorylation	2/1464	10/18866	0.179026	0.992895	0.981064	EIF2AK1/EIF2AK2	2
BP	GO:0015886	heme transport	2/1464	10/18866	0.179026	0.992895	0.981064	HRG/SLC46A1	2
BP	GO:0015893	drug transport	2/1464	10/18866	0.179026	0.992895	0.981064	ATP8B1/SLC46A1	2
BP	GO:0017062	respiratory chain complex III assembly	2/1464	10/18866	0.179026	0.992895	0.981064	UQCC1/UQCR10	2
BP	GO:0019062	virion attachment to host cell	2/1464	10/18866	0.179026	0.992895	0.981064	CD209/CLEC4M	2
BP	GO:0021932	hindbrain radial glia guided cell migration	2/1464	10/18866	0.179026	0.992895	0.981064	RERE/ATP1B2	2
BP	GO:0021936	regulation of cerebellar granule cell precursor proliferation	2/1464	10/18866	0.179026	0.992895	0.981064	SHH/GLI1	2
BP	GO:0032000	positive regulation of fatty acid beta-oxidation	2/1464	10/18866	0.179026	0.992895	0.981064	CPT1A/PLIN5	2
BP	GO:0034085	establishment of sister chromatid cohesion	2/1464	10/18866	0.179026	0.992895	0.981064	MAU2/DDX11	2
BP	GO:0034427	nuclear-transcribed mRNA catabolic process, exonucleolytic, 3'-5'	2/1464	10/18866	0.179026	0.992895	0.981064	EXOSC6/EXOSC7	2
BP	GO:0034551	mitochondrial respiratory chain complex III assembly	2/1464	10/18866	0.179026	0.992895	0.981064	UQCC1/UQCR10	2
BP	GO:0034651	cortisol biosynthetic process	2/1464	10/18866	0.179026	0.992895	0.981064	DGKQ/CACNA1H	2
BP	GO:0042541	hemoglobin biosynthetic process	2/1464	10/18866	0.179026	0.992895	0.981064	EIF2AK1/ALAS2	2
BP	GO:0045654	positive regulation of megakaryocyte differentiation	2/1464	10/18866	0.179026	0.992895	0.981064	FAXDC2/MTURN	2
BP	GO:0045713	low-density lipoprotein particle receptor biosynthetic process	2/1464	10/18866	0.179026	0.992895	0.981064	ADIPOQ/SCAP	2
BP	GO:0045988	negative regulation of striated muscle contraction	2/1464	10/18866	0.179026	0.992895	0.981064	ATP1A2/PDE5A	2
BP	GO:0046049	UMP metabolic process	2/1464	10/18866	0.179026	0.992895	0.981064	UCKL1/DHODH	2
BP	GO:0050861	positive regulation of B cell receptor signaling pathway	2/1464	10/18866	0.179026	0.992895	0.981064	PRKCB/SLC39A10	2
BP	GO:0052646	alditol phosphate metabolic process	2/1464	10/18866	0.179026	0.992895	0.981064	ACP6/GPD1L	2
BP	GO:0060068	vagina development	2/1464	10/18866	0.179026	0.992895	0.981064	RBP4/AXL	2
BP	GO:0060346	bone trabecula formation	2/1464	10/18866	0.179026	0.992895	0.981064	WNT10B/PPARGC1B	2
BP	GO:0060768	regulation of epithelial cell proliferation involved in prostate gland development	2/1464	10/18866	0.179026	0.992895	0.981064	SHH/STK11	2
BP	GO:0071233	cellular response to leucine	2/1464	10/18866	0.179026	0.992895	0.981064	UBR2/SESN1	2
BP	GO:0071649	regulation of chemokine (C-C motif) ligand 5 production	2/1464	10/18866	0.179026	0.992895	0.981064	DEFB124/MAVS	2
BP	GO:0072530	purine-containing compound transmembrane transport	2/1464	10/18866	0.179026	0.992895	0.981064	SLC29A2/SLC25A42	2
BP	GO:0090043	regulation of tubulin deacetylation	2/1464	10/18866	0.179026	0.992895	0.981064	NEK3/EP300	2
BP	GO:0090649	response to oxygen-glucose deprivation	2/1464	10/18866	0.179026	0.992895	0.981064	TSC1/ATF4	2
BP	GO:0097050	type B pancreatic cell apoptotic process	2/1464	10/18866	0.179026	0.992895	0.981064	SRSF6/CAPN10	2
BP	GO:0098779	positive regulation of mitophagy in response to mitochondrial depolarization	2/1464	10/18866	0.179026	0.992895	0.981064	VPS13C/CDC37	2
BP	GO:0098887	neurotransmitter receptor transport, endosome to postsynaptic membrane	2/1464	10/18866	0.179026	0.992895	0.981064	SCRIB/RAB8A	2
BP	GO:0099532	synaptic vesicle endosomal processing	2/1464	10/18866	0.179026	0.992895	0.981064	ITSN1/AP3D1	2
BP	GO:0099639	neurotransmitter receptor transport, endosome to plasma membrane	2/1464	10/18866	0.179026	0.992895	0.981064	SCRIB/RAB8A	2
BP	GO:1900426	positive regulation of defense response to bacterium	2/1464	10/18866	0.179026	0.992895	0.981064	NLRP10/SIGLEC16	2
BP	GO:1902645	tertiary alcohol biosynthetic process	2/1464	10/18866	0.179026	0.992895	0.981064	DGKQ/CACNA1H	2
BP	GO:1902946	protein localization to early endosome	2/1464	10/18866	0.179026	0.992895	0.981064	SCRIB/ROCK2	2
BP	GO:1904672	regulation of somatic stem cell population maintenance	2/1464	10/18866	0.179026	0.992895	0.981064	TAF6L/MYC	2
BP	GO:0003159	morphogenesis of an endothelium	3/1464	19/18866	0.17911	0.992895	0.981064	CXCR4/CSNK2B/STARD13	3
BP	GO:0007549	dosage compensation	3/1464	19/18866	0.17911	0.992895	0.981064	RBM15B/PRDM14/METTL3	3
BP	GO:0019054	modulation by virus of host cellular process	3/1464	19/18866	0.17911	0.992895	0.981064	SCRIB/PABPN1/KPNA5	3
BP	GO:0045947	negative regulation of translational initiation	3/1464	19/18866	0.17911	0.992895	0.981064	RBM4/EIF2AK1/ATF4	3
BP	GO:0045956	positive regulation of calcium ion-dependent exocytosis	3/1464	19/18866	0.17911	0.992895	0.981064	KCNB1/SCAMP5/CACNA1H	3
BP	GO:0050908	detection of light stimulus involved in visual perception	3/1464	19/18866	0.17911	0.992895	0.981064	CCDC66/RGS9BP/BEST1	3
BP	GO:0050962	detection of light stimulus involved in sensory perception	3/1464	19/18866	0.17911	0.992895	0.981064	CCDC66/RGS9BP/BEST1	3
BP	GO:0061154	endothelial tube morphogenesis	3/1464	19/18866	0.17911	0.992895	0.981064	CXCR4/CSNK2B/STARD13	3
BP	GO:0061318	renal filtration cell differentiation	3/1464	19/18866	0.17911	0.992895	0.981064	ADIPOQ/PTPRO/KLF15	3
BP	GO:0070989	oxidative demethylation	3/1464	19/18866	0.17911	0.992895	0.981064	ALKBH1/CYP2C9/CYP2C8	3
BP	GO:0072112	glomerular visceral epithelial cell differentiation	3/1464	19/18866	0.17911	0.992895	0.981064	ADIPOQ/PTPRO/KLF15	3
BP	GO:0090026	positive regulation of monocyte chemotaxis	3/1464	19/18866	0.17911	0.992895	0.981064	LGMN/DEFB124/CXCL12	3
BP	GO:0090153	regulation of sphingolipid biosynthetic process	3/1464	19/18866	0.17911	0.992895	0.981064	NSMAF/PLA2G6/ORMDL1	3
BP	GO:0150146	cell junction disassembly	3/1464	19/18866	0.17911	0.992895	0.981064	C1QC/C1QB/C1QA	3
BP	GO:1900747	negative regulation of vascular endothelial growth factor signaling pathway	3/1464	19/18866	0.17911	0.992895	0.981064	HRG/DAB2IP/XDH	3
BP	GO:1905038	regulation of membrane lipid metabolic process	3/1464	19/18866	0.17911	0.992895	0.981064	NSMAF/PLA2G6/ORMDL1	3
BP	GO:2000010	positive regulation of protein localization to cell surface	3/1464	19/18866	0.17911	0.992895	0.981064	TM9SF4/LRIG2/GPD1L	3
BP	GO:0043487	regulation of RNA stability	19/1464	195/18866	0.180324	0.992895	0.981064	PCBP4/YTHDF1/DXO/GIGYF2/FASTKD1/EXOSC6/DND1/GDNF/TIRAP/HNRNPC/FASTK/ZFP36L2/METTL3/FUS/PLEKHN1/EXOSC7/ROCK2/BOLL/DHX9	19
BP	GO:0006096	glycolytic process	12/1464	115/18866	0.180891	0.992895	0.981064	ADPGK/DHTKD1/FOXK1/OGT/PKLR/NCOR1/SLC4A1/POM121/OGDH/EP300/ENO3/SIRT6	12
BP	GO:0051225	spindle assembly	12/1464	115/18866	0.180891	0.992895	0.981064	WRAP73/CEP192/KIFC2/GOLGA2P5/MSTO1/INO80/LZTS2/NCOR1/NUMA1/HAUS5/RPS3/STARD9	12
BP	GO:0055074	calcium ion homeostasis	42/1464	468/18866	0.181007	0.992895	0.981064	CXCR4/SLC25A23/ATP13A1/PTH1R/CCR7/GSTM2/GIPR/CCL13/PRKCB/PACS2/SMAD3/NOS1/ATP13A2/P2RY1/ATP7B/TNNI3/NMUR2/MCOLN1/RMDN3/TPCN1/ABL1/P2RX1/CD38/ATF4/SLC35G1/ATP1A2/PLA2G6/CHRNA10/PML/S1PR4/KNG1/PRKACA/P2RY4/CCL8/PTGER2/DMPK/CACNB2/CXCL12/NPFF/CAPN3/LPAR3/CXCR2	42
BP	GO:0032732	positive regulation of interleukin-1 production	7/1464	60/18866	0.181633	0.992895	0.981064	LILRA2/IFI16/SMAD3/NLRP1/NLRP10/NOD1/IL17A	7
BP	GO:0061077	chaperone-mediated protein folding	7/1464	60/18866	0.181633	0.992895	0.981064	HSPB6/DFFA/TRAP1/HSPA6/UNC45A/DNAJC5/FKBP4	7
BP	GO:0030204	chondroitin sulfate metabolic process	5/1464	39/18866	0.182111	0.992895	0.981064	B3GALT6/IDUA/CHST12/BCAN/NCAN	5
BP	GO:0050775	positive regulation of dendrite morphogenesis	5/1464	39/18866	0.182111	0.992895	0.981064	PARP6/SS18L1/CAPRIN2/CUL7/FBXO31	5
BP	GO:0055069	zinc ion homeostasis	5/1464	39/18866	0.182111	0.992895	0.981064	SLC39A12/ATP13A2/SLC39A10/ATP7B/AP3D1	5
BP	GO:1902116	negative regulation of organelle assembly	5/1464	39/18866	0.182111	0.992895	0.981064	KAT2A/PATL2/TCHP/CDK10/SEC22B	5
BP	GO:0006637	acyl-CoA metabolic process	11/1464	104/18866	0.18256	0.992895	0.981064	PDK4/ACSS1/ACAT1/PDPR/ACACB/ACOT6/OGDH/FASN/ACSBG2/PDK2/TECR	11
BP	GO:0006892	post-Golgi vesicle-mediated transport	11/1464	104/18866	0.18256	0.992895	0.981064	GOLGA4/VPS52/MON2/VPS13C/ANKFY1/BBS2/SEC16A/GGA1/CORO7/SPTBN1/AP3D1	11
BP	GO:0010923	negative regulation of phosphatase activity	11/1464	104/18866	0.18256	0.992895	0.981064	URI1/CEP192/IKBKB/PPP1R35/CABIN1/ARPP19/SFI1/PHACTR1/CRY2/ROCK2/PPP1R10	11
BP	GO:0035383	thioester metabolic process	11/1464	104/18866	0.18256	0.992895	0.981064	PDK4/ACSS1/ACAT1/PDPR/ACACB/ACOT6/OGDH/FASN/ACSBG2/PDK2/TECR	11
BP	GO:0014823	response to activity	8/1464	71/18866	0.183691	0.992895	0.981064	CXCR4/ADIPOQ/HSF1/DNMT3B/TH/HDAC5/CRY2/CAPN3	8
BP	GO:0035690	cellular response to drug	8/1464	71/18866	0.183691	0.992895	0.981064	CXCR4/PPM1F/ADIPOQ/HSF1/PDE2A/TH/MYC/KMT2A	8
BP	GO:0032677	regulation of interleukin-8 production	10/1464	93/18866	0.183741	0.992895	0.981064	MAP2K5/ADIPOQ/CACTIN/ZNF580/NLRP10/IL17D/TIRAP/SSC5D/PTPN22/MAVS	10
BP	GO:0072080	nephron tubule development	10/1464	93/18866	0.183741	0.992895	0.981064	LAMA5/SHH/LZTS2/ACAT1/GPC3/PGF/GDNF/DLL1/HOXA11/MYC	10
BP	GO:0010882	regulation of cardiac muscle contraction by calcium ion signaling	4/1464	29/18866	0.184206	0.992895	0.981064	GSTM2/TNNI3/ATP1A2/PRKACA	4
BP	GO:0036296	response to increased oxygen levels	4/1464	29/18866	0.184206	0.992895	0.981064	NOX1/POLG/DNMT3B/ATP6	4
BP	GO:0042634	regulation of hair cycle	4/1464	29/18866	0.184206	0.992895	0.981064	TERT/WNT10B/NUMA1/MYSM1	4
BP	GO:0048679	regulation of axon regeneration	4/1464	29/18866	0.184206	0.992895	0.981064	CERS2/NDEL1/LRIG2/STK24	4
BP	GO:0070861	regulation of protein exit from endoplasmic reticulum	4/1464	29/18866	0.184206	0.992895	0.981064	TM9SF4/SEC16B/NUMA1/SEC16A	4
BP	GO:0031570	DNA integrity checkpoint	16/1464	161/18866	0.184212	0.992895	0.981064	THOC1/PCBP4/CDK5RAP3/RAD9A/GIGYF2/EME2/RPA4/UIMC1/MDC1/PML/MDM4/TICRR/EP300/PPP1R10/PIDD1/FBXO31	16
BP	GO:0045652	regulation of megakaryocyte differentiation	9/1464	82/18866	0.184225	0.992895	0.981064	L3MBTL1/TNRC6A/AGO4/FAXDC2/KMT2D/EP300/MTURN/KMT2B/KMT2A	9
BP	GO:1902903	regulation of supramolecular fiber organization	34/1464	373/18866	0.184991	0.992895	0.981064	GBA2/TSC1/SLC39A12/TRIM27/SSH3/CCR7/PPM1F/RICTOR/ARHGEF18/SMAD3/PPP1R9A/ARHGEF15/SSH2/AVIL/TESK1/NUMA1/ABL1/OCLN/PICK1/PSRC1/TRIOBP/PLEKHH2/FKBP4/TTBK2/RPS3/BMP10/ROCK2/CXCL12/FLII/SPTBN1/ACTR3B/MYOC/MYLK3/ADD1	34
BP	GO:0002831	regulation of response to biotic stimulus	37/1464	409/18866	0.185253	0.992895	0.981064	CD209/RNF135/COCH/LILRA2/VSIG4/ZCCHC3/IFI16/HRG/NLRC3/SEC14L1/TTLL12/FCGR2B/CLEC10A/CARD11/IKBKB/PIK3R6/CACTIN/ICAM2/SLAMF6/TAB1/ARRB2/NLRP10/TIRAP/SIGLEC16/IRF7/NOD1/EP300/METTL3/PRKACA/CDC37/PTPN22/ZBP1/ADAR/MAVS/POLR3D/RAF1/DHX9	37
BP	GO:0060759	regulation of response to cytokine stimulus	19/1464	196/18866	0.186097	0.992895	0.981064	MAP2K5/CXCR4/CPNE1/TTLL12/ADIPOQ/IKBKB/CACTIN/IRF7/METTL3/AXL/CDC37/ANGPT1/ZBP1/ADAR/MAVS/SHARPIN/SPPL2B/MADD/DHX9	19
BP	GO:0051053	negative regulation of DNA metabolic process	13/1464	127/18866	0.186099	0.992895	0.981064	THOC1/CTC1/HNRNPA1/ADIPOQ/HSF1/PARP3/DFFA/HNRNPC/RPS3/UBR5/PAM16/KMT2A/PIF1	13
BP	GO:1900180	regulation of protein localization to nucleus	13/1464	127/18866	0.186099	0.992895	0.981064	TERT/SHH/CDK5RAP3/SMAD3/LZTS2/ATP13A2/APOD/POLR1A/NOLC1/STK11/ANGPT1/UBR5/MAVS	13
BP	GO:0035264	multicellular organism growth	15/1464	150/18866	0.187368	0.992895	0.981064	KAT2A/KLF2/LGMN/CTC1/WDR11/GIGYF2/HSF1/BBS2/ANKRD11/ARID5B/ETNK2/EP300/FXN/RBBP6/ADD1	15
BP	GO:0070665	positive regulation of leukocyte proliferation	15/1464	150/18866	0.187368	0.992895	0.981064	CD209/DNAJA3/SHH/CARD11/SLC39A10/MPL/CD38/TIRAP/ZNF335/TICAM1/PTPN22/BST2/RPS3/VTCN1/CD320	15
BP	GO:0006354	DNA-templated transcription, elongation	12/1464	116/18866	0.18852	0.992895	0.981064	THOC1/RTF1/CDK13/SHH/TAF1D/MLLT1/SETD5/NELFCD/ERCC3/POLR1A/CDK9/SUPT16H	12
BP	GO:0006757	ATP generation from ADP	12/1464	116/18866	0.18852	0.992895	0.981064	ADPGK/DHTKD1/FOXK1/OGT/PKLR/NCOR1/SLC4A1/POM121/OGDH/EP300/ENO3/SIRT6	12
BP	GO:0032392	DNA geometric change	12/1464	116/18866	0.18852	0.992895	0.981064	CHD2/WRNIP1/CHTF18/DDX11/SETX/CHD1L/SUPV3L1/ERCC3/ERCC8/RECQL4/PIF1/DHX9	12
BP	GO:1903829	positive regulation of cellular protein localization	31/1464	338/18866	0.188528	0.992895	0.981064	TERT/C2CD5/HPS4/TM9SF4/SEC16B/SHH/KCNB1/EPB41/CDK5RAP3/TP73/SMAD3/MTCL1/MIEF1/PPP3CC/NUMA1/ZDHHC8/UBL4B/SORBS1/SEC16A/ABLIM3/STK11/PRKACA/USP36/LRP4/UBR5/LRIG2/MAVS/ROCK2/SPTBN1/GPD1L/ARHGEF16	31
BP	GO:0006936	muscle contraction	33/1464	362/18866	0.189042	0.992895	0.981064	CCDC78/CXCR4/RCSD1/CHRNE/GSTM2/LTB4R/PABPN1/NOS1/HSPB6/KCNJ2/TNNI3/NMUR2/BBS2/GDNF/SORBS1/P2RX1/CD38/ATP1A2/PLA2G6/KCNIP2/NPPA/TLN1/SMTN/PRKACA/CACNA1H/BMP10/KCNA1/DMPK/ROCK2/CACNB2/PDE5A/PPP1R12B/GPD1L	33
BP	GO:0007015	actin filament organization	39/1464	434/18866	0.189056	0.992895	0.981064	GBA2/MYO19/TSC1/HIP1/AIF1L/TRIM27/SSH3/CCR7/PPM1F/MYO5C/RICTOR/ARHGEF18/MYO1G/SMAD3/PPP1R9A/ARHGEF15/SSH2/AVIL/PPARGC1B/TESK1/ABL1/PDLIM1/SORBS1/PICK1/SHROOM1/TRIOBP/FSCN3/PLEKHH2/ARHGAP17/PHACTR1/CORO7/ROCK2/CXCL12/MYO7B/FLII/SPTBN1/ACTR3B/MYOC/ADD1	39
BP	GO:0001961	positive regulation of cytokine-mediated signaling pathway	6/1464	50/18866	0.189104	0.992895	0.981064	CXCR4/CPNE1/IRF7/AXL/ZBP1/MAVS	6
BP	GO:0008038	neuron recognition	6/1464	50/18866	0.189104	0.992895	0.981064	CXCR4/NTM/MEGF8/IGSF9/EMB/GAP43	6
BP	GO:0021549	cerebellum development	11/1464	105/18866	0.190648	0.992895	0.981064	RERE/FCGR2B/NCSTN/B4GALT2/ABL1/ND4/GLI1/DLL1/COX1/TTBK2/SDF4	11
BP	GO:0048259	regulation of receptor-mediated endocytosis	11/1464	105/18866	0.190648	0.992895	0.981064	HIP1/ANKRD13B/SCRIB/FLOT1/TNK2/ARRB2/PICK1/NUMB/TBC1D5/DGKD/ANGPT1	11
BP	GO:2001022	positive regulation of response to DNA damage stimulus	11/1464	105/18866	0.190648	0.992895	0.981064	RAD9A/PARP3/DDX11/SPIDR/UIMC1/MMS19/ERCC8/FUS/RPS3/MYC/DHX9	11
BP	GO:0045843	negative regulation of striated muscle tissue development	7/1464	61/18866	0.192457	0.992895	0.981064	SOX6/RBP4/JARID2/TP73/USP19/DLL1/LUC7L	7
BP	GO:0061912	selective autophagy	7/1464	61/18866	0.192457	0.992895	0.981064	CALCOCO2/VPS13C/ATG14/UFC1/NOD1/ATG2A/CDC37	7
BP	GO:2000756	regulation of peptidyl-lysine acetylation	7/1464	61/18866	0.192457	0.992895	0.981064	KAT2A/CTBP1/NOS1/SETD5/GLYR1/KLF15/KMT2A	7
BP	GO:0048145	regulation of fibroblast proliferation	9/1464	83/18866	0.19345	0.992895	0.981064	CTC1/NLRC3/DAB2IP/PARP10/PML/CD300A/MYC/SIRT6/DHX9	9
BP	GO:0055117	regulation of cardiac muscle contraction	9/1464	83/18866	0.19345	0.992895	0.981064	GSTM2/NOS1/KCNJ2/TNNI3/ATP1A2/NPPA/PRKACA/BMP10/PDE5A	9
BP	GO:0015718	monocarboxylic acid transport	17/1464	174/18866	0.193483	0.992895	0.981064	CPT1A/SLC25A20/SLC38A5/PRKAB2/SLC16A5/THRSP/ATP8B1/NMUR2/ACACB/SLC27A3/FABP4/PLA2G6/SLCO1A2/EMB/SLC38A7/PROCA1/ABCD4	17
BP	GO:0043647	inositol phosphate metabolic process	8/1464	72/18866	0.19364	0.992895	0.981064	NUDT3/INPP5E/PTH1R/IP6K2/P2RY1/IP6K1/ITPK1/PLCB2	8
BP	GO:0061515	myeloid cell development	8/1464	72/18866	0.19364	0.992895	0.981064	SOX6/SLC9B2/BRD1/KLF2/SLC4A1/L3MBTL3/EP300/ALAS2	8
BP	GO:0031669	cellular response to nutrient levels	21/1464	221/18866	0.195449	0.992895	0.981064	PDK4/TSC1/IFI16/FOLR2/KCNB1/HNRNPA1/SZT2/ITFG2/EHMT2/TNRC6A/SESN1/RALB/ATF4/ATG14/PICK1/FOLR1/PDK2/WDR59/EIF2AK2/MYBBP1A/STK24	21
BP	GO:0030488	tRNA methylation	5/1464	40/18866	0.195812	0.992895	0.981064	NSUN6/TRMT10B/THUMPD2/GTPBP3/TRMT1	5
BP	GO:0043001	Golgi to plasma membrane protein transport	5/1464	40/18866	0.195812	0.992895	0.981064	GOLGA4/BBS2/SEC16A/GGA1/SPTBN1	5
BP	GO:0045740	positive regulation of DNA replication	5/1464	40/18866	0.195812	0.992895	0.981064	BRPF3/INO80/CTC1/GLI1/DHX9	5
BP	GO:0045746	negative regulation of Notch signaling pathway	5/1464	40/18866	0.195812	0.992895	0.981064	CBFA2T2/MAGEA1/DLL1/METTL3/HIF1AN	5
BP	GO:0090184	positive regulation of kidney development	5/1464	40/18866	0.195812	0.992895	0.981064	SHH/ADIPOQ/GDNF/RET/MYC	5
BP	GO:1902742	apoptotic process involved in development	5/1464	40/18866	0.195812	0.992895	0.981064	XKR8/SCRIB/LRP5/XKR6/SIX3	5
BP	GO:0043488	regulation of mRNA stability	18/1464	186/18866	0.195877	0.992895	0.981064	PCBP4/YTHDF1/GIGYF2/FASTKD1/EXOSC6/DND1/GDNF/TIRAP/HNRNPC/FASTK/ZFP36L2/METTL3/FUS/PLEKHN1/EXOSC7/ROCK2/BOLL/DHX9	18
BP	GO:0031109	microtubule polymerization or depolymerization	12/1464	117/18866	0.196295	0.992895	0.981064	GBA2/SLC39A12/STMN3/CEP192/NDEL1/NUMA1/ABL1/OCLN/PSRC1/FKBP4/TTBK2/RPS3	12
BP	GO:0072676	lymphocyte migration	12/1464	117/18866	0.196295	0.992895	0.981064	CCR7/CCL13/MYO1G/ITGA4/CCL27/APOD/CCL16/SPNS2/RET/CCL8/CXCL12/MIA3	12
BP	GO:0009267	cellular response to starvation	16/1464	163/18866	0.197239	0.992895	0.981064	PDK4/IFI16/HNRNPA1/SZT2/ITFG2/EHMT2/TNRC6A/SESN1/RALB/ATF4/ATG14/PICK1/WDR59/EIF2AK2/MYBBP1A/STK24	16
BP	GO:0042113	B cell activation	30/1464	328/18866	0.197286	0.992895	0.981064	THOC1/GON4L/PRKCB/ITGA4/FCGR2B/ITFG2/CARD11/SLC39A10/EXOSC6/PARP3/MZB1/POLM/ABL1/AKAP17A/DCLRE1C/CD38/MFNG/TIRAP/TICAM1/DLL1/EP300/ZFP36L2/IFNA4/HDAC5/BST2/IGLL1/STAT6/CD320/CD300A/KLF6	30
BP	GO:0006402	mRNA catabolic process	34/1464	376/18866	0.197736	0.992895	0.981064	PCBP4/PAN2/PATL2/EDC4/GTPBP2/YTHDF1/DXO/GIGYF2/UPF2/FASTKD1/RPLP1/EXOSC6/DND1/TNRC6A/AGO4/RPS28/GDNF/UPF3A/RPS17/TIRAP/SUPV3L1/HNRNPC/FASTK/RPL38/ZFP36L2/METTL3/FUS/PLEKHN1/EXOSC7/RPS3/ROCK2/RNH1/BOLL/DHX9	34
BP	GO:0010875	positive regulation of cholesterol efflux	3/1464	20/18866	0.199354	0.992895	0.981064	PLTP/ADIPOQ/ZDHHC8	3
BP	GO:0015669	gas transport	3/1464	20/18866	0.199354	0.992895	0.981064	HBB/HBD/MYC	3
BP	GO:0022038	corpus callosum development	3/1464	20/18866	0.199354	0.992895	0.981064	NSUN5/SZT2/WDR89	3
BP	GO:0031998	regulation of fatty acid beta-oxidation	3/1464	20/18866	0.199354	0.992895	0.981064	CPT1A/ACACB/PLIN5	3
BP	GO:0032332	positive regulation of chondrocyte differentiation	3/1464	20/18866	0.199354	0.992895	0.981064	SOX6/SMAD3/HOXA11	3
BP	GO:0032495	response to muramyl dipeptide	3/1464	20/18866	0.199354	0.992895	0.981064	NLRP1/NOD1/PTPN22	3
BP	GO:0032727	positive regulation of interferon-alpha production	3/1464	20/18866	0.199354	0.992895	0.981064	IRF7/MAVS/DHX9	3
BP	GO:0032986	protein-DNA complex disassembly	3/1464	20/18866	0.199354	0.992895	0.981064	SMARCD1/SUPT16H/MYC	3
BP	GO:0043950	positive regulation of cAMP-mediated signaling	3/1464	20/18866	0.199354	0.992895	0.981064	GIPR/NOS1/MRAP	3
BP	GO:0046655	folic acid metabolic process	3/1464	20/18866	0.199354	0.992895	0.981064	FOLR2/SLC46A1/FOLR1	3
BP	GO:0072311	glomerular epithelial cell differentiation	3/1464	20/18866	0.199354	0.992895	0.981064	ADIPOQ/PTPRO/KLF15	3
BP	GO:0098884	postsynaptic neurotransmitter receptor internalization	3/1464	20/18866	0.199354	0.992895	0.981064	SCRIB/NUMB/MX2	3
BP	GO:0140239	postsynaptic endocytosis	3/1464	20/18866	0.199354	0.992895	0.981064	SCRIB/NUMB/MX2	3
BP	GO:0034764	positive regulation of transmembrane transport	20/1464	210/18866	0.199649	0.992895	0.981064	TERT/C2CD5/WNK2/GSTM2/NOS1/GPC3/KCNJ2/ADIPOQ/CAPN10/ABL1/SORBS1/OCLN/KLF15/KCNIP2/NPPA/ARPP19/KCNA1/CACNB2/ATP1B2/CAPN3	20
BP	GO:0000027	ribosomal large subunit assembly	4/1464	30/18866	0.200433	0.992895	0.981064	RRS1/NOP2/RPL38/MDN1	4
BP	GO:0000132	establishment of mitotic spindle orientation	4/1464	30/18866	0.200433	0.992895	0.981064	NDEL1/INSC/SAPCD2/NUMA1	4
BP	GO:0031116	positive regulation of microtubule polymerization	4/1464	30/18866	0.200433	0.992895	0.981064	NUMA1/OCLN/PSRC1/RPS3	4
BP	GO:0033688	regulation of osteoblast proliferation	4/1464	30/18866	0.200433	0.992895	0.981064	SMAD3/LRP5/ABL1/EIF2AK2	4
BP	GO:0044030	regulation of DNA methylation	4/1464	30/18866	0.200433	0.992895	0.981064	MBD1/PRDM14/MYC/KMT2A	4
BP	GO:0062125	regulation of mitochondrial gene expression	4/1464	30/18866	0.200433	0.992895	0.981064	UQCC1/NGRN/CDK5RAP1/ALKBH1	4
BP	GO:0090314	positive regulation of protein targeting to membrane	4/1464	30/18866	0.200433	0.992895	0.981064	C2CD5/KCNB1/MTCL1/MIEF1	4
BP	GO:1900746	regulation of vascular endothelial growth factor signaling pathway	4/1464	30/18866	0.200433	0.992895	0.981064	HRG/DAB2IP/DLL1/XDH	4
BP	GO:0051604	protein maturation	27/1464	293/18866	0.20097	0.992895	0.981064	APH1B/IFI16/SHH/LGMN/FGB/OGT/DOHH/NCSTN/CHCHD4/ATP7B/F12/NAA40/CD5L/MMS19/PCSK7/HM13/CIDEB/CPN1/EP300/LMF2/PRKACA/TSHB/APH1A/FXN/LMF1/PIDD1/RCE1	27
BP	GO:0061326	renal tubule development	10/1464	95/18866	0.201144	0.992895	0.981064	LAMA5/SHH/LZTS2/ACAT1/GPC3/PGF/GDNF/DLL1/HOXA11/MYC	10
BP	GO:0032206	positive regulation of telomere maintenance	6/1464	51/18866	0.201316	0.992895	0.981064	HNRNPA1/HMBOX1/MAP3K4/PML/PPP1R10/SIRT6	6
BP	GO:0048511	rhythmic process	28/1464	305/18866	0.201394	0.992895	0.981064	UBE3A/CPT1A/RBM4/OPN5/TIMP4/USP7/OGT/NCOR1/ADIPOQ/RETN/SETX/ATF4/ARRB2/TH/PML/EP300/METTL3/AXL/MTA1/CRY2/CIPC/ROCK2/SIX3/KMT2A/MYBBP1A/OPN4/DHX9/NR5A1	28
BP	GO:0048144	fibroblast proliferation	9/1464	84/18866	0.202869	0.992895	0.981064	CTC1/NLRC3/DAB2IP/PARP10/PML/CD300A/MYC/SIRT6/DHX9	9
BP	GO:0007405	neuroblast proliferation	7/1464	62/18866	0.203531	0.992895	0.981064	FZD3/SHH/DCT/NUMB/ZNF335/KCNA1/SIX3	7
BP	GO:0034113	heterotypic cell-cell adhesion	7/1464	62/18866	0.203531	0.992895	0.981064	GLDN/MAP2K5/FGB/ITGA4/ADIPOQ/FLOT1/ITGA7	7
BP	GO:0048635	negative regulation of muscle organ development	7/1464	62/18866	0.203531	0.992895	0.981064	SOX6/RBP4/JARID2/TP73/USP19/DLL1/LUC7L	7
BP	GO:1902475	L-alpha-amino acid transmembrane transport	7/1464	62/18866	0.203531	0.992895	0.981064	SLC7A8/SLC38A5/SLC7A6/SLC38A1/SLC43A1/ATP1A2/SLC38A7	7
BP	GO:1904589	regulation of protein import	7/1464	62/18866	0.203531	0.992895	0.981064	SHH/SMAD3/APOD/NOLC1/ANGPT1/UBR5/MAVS	7
BP	GO:0042795	snRNA transcription by RNA polymerase II	8/1464	73/18866	0.203806	0.992895	0.981064	INTS3/RPRD2/POU2F1/INTS1/CDK9/SRRT/SNAPC4/TAF6	8
BP	GO:0072078	nephron tubule morphogenesis	8/1464	73/18866	0.203806	0.992895	0.981064	LAMA5/SHH/LZTS2/GPC3/PGF/GDNF/HOXA11/MYC	8
BP	GO:0006816	calcium ion transport	38/1464	426/18866	0.205433	0.992895	0.981064	TMEM37/HOMER3/LILRA2/CXCR4/SLC25A23/TRIM27/CCR7/ORAI2/EPB41/GSTM2/CAMK2G/CACNG6/PRKCB/NOS1/ASIC1/NMUR2/MCOLN1/TPCN1/ABL1/P2RX1/ARRB2/CATSPER3/SLC35G1/ATP1A2/PLA2G6/CHRNA10/NPPA/PML/TRPM7/PRKACA/CACNA1H/BEST1/CCL8/CACNB2/CXCL12/CAPN3/BSPRY/LPAR3	38
BP	GO:0001820	serotonin secretion	2/1464	11/18866	0.208138	0.992895	0.981064	P2RX1/HRH3	2
BP	GO:0006348	chromatin silencing at telomere	2/1464	11/18866	0.208138	0.992895	0.981064	EZH1/SIRT6	2
BP	GO:0006570	tyrosine metabolic process	2/1464	11/18866	0.208138	0.992895	0.981064	DCT/TH	2
BP	GO:0014820	tonic smooth muscle contraction	2/1464	11/18866	0.208138	0.992895	0.981064	BBS2/CD38	2
BP	GO:0019042	viral latency	2/1464	11/18866	0.208138	0.992895	0.981064	IRF7/HCFC1	2
BP	GO:0031284	positive regulation of guanylate cyclase activity	2/1464	11/18866	0.208138	0.992895	0.981064	GUCA1C/NOS1	2
BP	GO:0033539	fatty acid beta-oxidation using acyl-CoA dehydrogenase	2/1464	11/18866	0.208138	0.992895	0.981064	IVD/ACADVL	2
BP	GO:0034115	negative regulation of heterotypic cell-cell adhesion	2/1464	11/18866	0.208138	0.992895	0.981064	MAP2K5/ADIPOQ	2
BP	GO:0034650	cortisol metabolic process	2/1464	11/18866	0.208138	0.992895	0.981064	DGKQ/CACNA1H	2
BP	GO:0035457	cellular response to interferon-alpha	2/1464	11/18866	0.208138	0.992895	0.981064	IFIT3/AXL	2
BP	GO:0035865	cellular response to potassium ion	2/1464	11/18866	0.208138	0.992895	0.981064	HSF1/CACNA1H	2
BP	GO:0043379	memory T cell differentiation	2/1464	11/18866	0.208138	0.992895	0.981064	TSC1/IFNL1	2
BP	GO:0044848	biological phase	2/1464	11/18866	0.208138	0.992895	0.981064	WNT10B/SYCP2	2
BP	GO:0045060	negative thymic T cell selection	2/1464	11/18866	0.208138	0.992895	0.981064	CCR7/SHH	2
BP	GO:0046950	cellular ketone body metabolic process	2/1464	11/18866	0.208138	0.992895	0.981064	ACAT1/BDH1	2
BP	GO:0051006	positive regulation of lipoprotein lipase activity	2/1464	11/18866	0.208138	0.992895	0.981064	GPIHBP1/LMF1	2
BP	GO:0051974	negative regulation of telomerase activity	2/1464	11/18866	0.208138	0.992895	0.981064	PARP3/PIF1	2
BP	GO:0060433	bronchus development	2/1464	11/18866	0.208138	0.992895	0.981064	SPDEF/TULP3	2
BP	GO:0060767	epithelial cell proliferation involved in prostate gland development	2/1464	11/18866	0.208138	0.992895	0.981064	SHH/STK11	2
BP	GO:0070142	synaptic vesicle budding	2/1464	11/18866	0.208138	0.992895	0.981064	MX2/AP3D1	2
BP	GO:0070587	regulation of cell-cell adhesion involved in gastrulation	2/1464	11/18866	0.208138	0.992895	0.981064	MAP2K5/ADIPOQ	2
BP	GO:0071609	chemokine (C-C motif) ligand 5 production	2/1464	11/18866	0.208138	0.992895	0.981064	DEFB124/MAVS	2
BP	GO:0090193	positive regulation of glomerulus development	2/1464	11/18866	0.208138	0.992895	0.981064	ADIPOQ/RET	2
BP	GO:0090309	positive regulation of DNA methylation-dependent heterochromatin assembly	2/1464	11/18866	0.208138	0.992895	0.981064	ATF7IP/SETDB1	2
BP	GO:0090557	establishment of endothelial intestinal barrier	2/1464	11/18866	0.208138	0.992895	0.981064	TJP3/FASN	2
BP	GO:0090715	immunological memory formation process	2/1464	11/18866	0.208138	0.992895	0.981064	TSC1/IFNL1	2
BP	GO:0106049	regulation of cellular response to osmotic stress	2/1464	11/18866	0.208138	0.992895	0.981064	SLC25A23/EFHD1	2
BP	GO:0140052	cellular response to oxidised low-density lipoprotein particle stimulus	2/1464	11/18866	0.208138	0.992895	0.981064	TICAM1/MIA3	2
BP	GO:1901526	positive regulation of mitophagy	2/1464	11/18866	0.208138	0.992895	0.981064	VPS13C/CDC37	2
BP	GO:1902915	negative regulation of protein polyubiquitination	2/1464	11/18866	0.208138	0.992895	0.981064	PARP10/UBR5	2
BP	GO:1904350	regulation of protein catabolic process in the vacuole	2/1464	11/18866	0.208138	0.992895	0.981064	MFSD8/ATP13A2	2
BP	GO:1905168	positive regulation of double-strand break repair via homologous recombination	2/1464	11/18866	0.208138	0.992895	0.981064	MMS19/FUS	2
BP	GO:1905383	protein localization to presynapse	2/1464	11/18866	0.208138	0.992895	0.981064	DVL1/KIF5A	2
BP	GO:2000574	regulation of microtubule motor activity	2/1464	11/18866	0.208138	0.992895	0.981064	MTCL1/NDEL1	2
BP	GO:0071478	cellular response to radiation	18/1464	188/18866	0.208381	0.992895	0.981064	GUCA1C/IFI16/OPN5/ACTR5/MAPK13/INO80/RAD9A/HSF1/GPR52/SPIDR/ATF4/GRK1/EP300/METTL3/STK11/CRY2/MYC/OPN4	18
BP	GO:0021537	telencephalon development	24/1464	259/18866	0.209616	0.992895	0.981064	SUN1/TSC1/CXCR4/KAT2A/EZH1/SYNE2/SHH/NSUN5/SZT2/NDEL1/BBS2/DAB2IP/ATAT1/TH/ATP1A2/NUMB/EFHC1/BCAN/KCNA1/PHACTR1/CXCL12/SIX3/ATP1B2/WDR89	24
BP	GO:0001941	postsynaptic membrane organization	5/1464	41/18866	0.209856	0.992895	0.981064	DNAJA3/DVL1/GDNF/LRP4/SHISA6	5
BP	GO:0021532	neural tube patterning	5/1464	41/18866	0.209856	0.992895	0.981064	WDR19/SHH/IFT140/PRKACA/TULP3	5
BP	GO:0051180	vitamin transport	5/1464	41/18866	0.209856	0.992895	0.981064	FOLR2/ABCC1/SLC46A1/FOLR1/CD320	5
BP	GO:0051693	actin filament capping	5/1464	41/18866	0.209856	0.992895	0.981064	AVIL/TRIOBP/FLII/SPTBN1/ADD1	5
BP	GO:0031032	actomyosin structure organization	19/1464	200/18866	0.210089	0.992895	0.981064	TSC1/EPB41/PPM1F/ARHGEF18/SMAD3/PPP1R9A/ARHGEF15/TESK1/ABL1/PDLIM1/SORBS1/TRPM7/BMP10/PHACTR1/ROCK2/FLII/CAPN3/MYOC/MYLK3	19
BP	GO:0030317	flagellated sperm motility	10/1464	96/18866	0.2101	0.992895	0.981064	SLC9B2/TTC21A/PLTP/TPGS1/TTLL9/BBS2/SPEM1/NPHP4/CATSPER3/PRDM14	10
BP	GO:0097722	sperm motility	10/1464	96/18866	0.2101	0.992895	0.981064	SLC9B2/TTC21A/PLTP/TPGS1/TTLL9/BBS2/SPEM1/NPHP4/CATSPER3/PRDM14	10
BP	GO:0006839	mitochondrial transport	25/1464	271/18866	0.210204	0.992895	0.981064	CPT1A/SLC25A20/HPS4/SLC25A23/SLC25A36/TP73/PRKAB2/RHOT2/SFXN4/THRSP/CHCHD4/ACACB/PPP3CC/UBL4B/TOMM40/MPV17L/ABLIM3/SLC25A6/SLC25A37/GRPEL1/USP36/SFXN5/PAM16/ATP6/TIMM23B	25
BP	GO:0008654	phospholipid biosynthetic process	25/1464	271/18866	0.210204	0.992895	0.981064	INPP5E/CHKA/PIGG/DGKA/DGKQ/PIGL/CPNE1/CHKB/PIGS/PIK3R6/CSNK2B/PIK3R5/LPCAT4/PLA2G6/PCYT2/ETNK2/PCYT1A/DGKD/PIGB/DGKE/FITM1/ACP6/DOLPP1/SBF1/GPD1L	25
BP	GO:0046651	lymphocyte proliferation	26/1464	283/18866	0.210659	0.992895	0.981064	CD209/VSIG4/DNAJA3/MAD1L1/CLEC4G/SHH/SCRIB/FCGR2B/CARD11/SLC39A10/NCSTN/MPL/MZB1/ABL1/CD38/TIRAP/TNFSF8/ZNF335/TICAM1/IFNA4/PTPN22/RPS3/VTCN1/CD320/CD300A/PDE5A	26
BP	GO:0051098	regulation of binding	33/1464	367/18866	0.211137	0.992895	0.981064	TERT/MAU2/DVL1/IFI16/HOXA3/SYMPK/EPB41/CPNE1/SMAD3/ITGA4/HMBOX1/CAPRIN2/P2RY1/ADIPOQ/MMP8/HSF1/DDX11/ABL1/FLOT1/CSNK2B/RALB/ARRB2/MFNG/TICAM1/EP300/STK4/PRKACA/HDAC5/TTBK2/ANGPT1/CDK9/DHX9/ADD1	33
BP	GO:0051650	establishment of vesicle localization	20/1464	212/18866	0.211513	0.992895	0.981064	MYO19/TRAK1/SEC16B/MYO5C/GORASP1/MYO1G/WDR11/ITGA4/SCRIB/NDEL1/KIF5A/BBS2/SEC16A/SEC22B/STK11/FOLR1/MX2/MYO7B/SEC24C/AP3D1	20
BP	GO:0031333	negative regulation of protein-containing complex assembly	14/1464	142/18866	0.212154	0.992895	0.981064	SSH3/NLRC3/SSH2/AVIL/HSF1/MEFV/CPTP/EP300/TRIOBP/FKBP4/FLII/SPTBN1/RAF1/ADD1	14
BP	GO:0007127	meiosis I	12/1464	119/18866	0.212266	0.992895	0.981064	SUN1/C11orf80/UBR2/REC8/RAD51D/EME2/BAG6/AGO4/SYCP2/CDC25B/CCNE1/CORT	12
BP	GO:0051153	regulation of striated muscle cell differentiation	12/1464	119/18866	0.212266	0.992895	0.981064	SOX6/KAT2A/SHH/FLOT1/ARRB2/DLL1/NLN/HDAC5/BMP10/DMPK/MAML1/MYLK3	12
BP	GO:1901222	regulation of NIK/NF-kappaB signaling	12/1464	119/18866	0.212266	0.992895	0.981064	CPNE1/NLRC3/C1QTNF3/MMP8/TIRAP/ZFP91/NOD1/EP300/PTPN22/RPS3/EIF2AK2/UACA	12
BP	GO:0006970	response to osmotic stress	9/1464	85/18866	0.212472	0.992895	0.981064	RCSD1/SLC25A23/MAPK13/TSC22D4/LRRC8E/TH/NOLC1/EFHD1/CAPN3	9
BP	GO:0030101	natural killer cell activation	9/1464	85/18866	0.212472	0.992895	0.981064	ULBP1/BAG6/RHBDD3/KIR3DS1/TICAM1/IFNA4/AXL/PTPN22/DCAF15	9
BP	GO:2000779	regulation of double-strand break repair	9/1464	85/18866	0.212472	0.992895	0.981064	HSF1/PARP3/DDX11/SPIDR/MMS19/PML/FUS/UBR5/SIRT6	9
BP	GO:0044242	cellular lipid catabolic process	22/1464	236/18866	0.213656	0.992895	0.981064	GBA2/CPT1A/IVD/GPCPD1/ECI2/CYP26A1/ACADVL/PNPLA1/ACAT1/ECI1/ADIPOQ/ACACB/ILVBL/MGLL/FABP4/PNPLA2/PLA2G6/PLIN5/PLA2G15/ECH1/ABCD4/ECHDC2	22
BP	GO:0009994	oocyte differentiation	6/1464	52/18866	0.213807	0.992895	0.981064	REC8/PABPC1L/CDC25B/KMT2D/KMT2B/PDE5A	6
BP	GO:0038066	p38MAPK cascade	6/1464	52/18866	0.213807	0.992895	0.981064	MAP3K4/HGF/DAB2IP/PTPN22/RELL2/XDH	6
BP	GO:0048260	positive regulation of receptor-mediated endocytosis	6/1464	52/18866	0.213807	0.992895	0.981064	HIP1/ARRB2/PICK1/TBC1D5/DGKD/ANGPT1	6
BP	GO:0009301	snRNA transcription	8/1464	74/18866	0.21418	0.992895	0.981064	INTS3/RPRD2/POU2F1/INTS1/CDK9/SRRT/SNAPC4/TAF6	8
BP	GO:0046503	glycerolipid catabolic process	8/1464	74/18866	0.21418	0.992895	0.981064	GPCPD1/PNPLA1/MGLL/FABP4/PNPLA2/PLA2G6/PLIN5/PLA2G15	8
BP	GO:0031122	cytoplasmic microtubule organization	7/1464	63/18866	0.214842	0.992895	0.981064	DVL1/STMN3/NUMA1/CCDC88C/HOOK2/WDR73/KATNAL2	7
BP	GO:0031571	mitotic G1 DNA damage checkpoint	7/1464	63/18866	0.214842	0.992895	0.981064	PCBP4/GIGYF2/PML/MDM4/EP300/PIDD1/FBXO31	7
BP	GO:0046530	photoreceptor cell differentiation	7/1464	63/18866	0.214842	0.992895	0.981064	TUG1/NPHP4/TH/IFT140/RPGRIP1/RDH13/CABP4	7
BP	GO:0051250	negative regulation of lymphocyte activation	15/1464	154/18866	0.215116	0.992895	0.981064	THOC1/VSIG4/MAD1L1/CLEC4G/SHH/SCRIB/FCGR2B/PARP3/IFNL1/RHBDD3/AXL/PTPN22/VTCN1/CD300A/PDE5A	15
BP	GO:0006024	glycosaminoglycan biosynthetic process	11/1464	108/18866	0.215845	0.992895	0.981064	ABCC5/B4GALT3/NDST3/ST3GAL3/GPC3/B3GALT6/B4GALT2/CHST12/BCAN/ANGPT1/NCAN	11
BP	GO:0046887	positive regulation of hormone secretion	13/1464	131/18866	0.216311	0.992895	0.981064	ITSN1/RBP4/GIPR/FGB/C1QTNF3/P2RY1/CAPN10/RETN/CD38/PLA2G6/NPPA/NADK/RASL10B	13
BP	GO:0003299	muscle hypertrophy in response to stress	4/1464	31/18866	0.217066	0.992895	0.981064	SMAD3/KLF15/NPPA/BMP10	4
BP	GO:0010644	cell communication by electrical coupling	4/1464	31/18866	0.217066	0.992895	0.981064	ATP1A2/PRKACA/KCNA1/ATP1B2	4
BP	GO:0014887	cardiac muscle adaptation	4/1464	31/18866	0.217066	0.992895	0.981064	SMAD3/KLF15/NPPA/BMP10	4
BP	GO:0014898	cardiac muscle hypertrophy in response to stress	4/1464	31/18866	0.217066	0.992895	0.981064	SMAD3/KLF15/NPPA/BMP10	4
BP	GO:0018200	peptidyl-glutamic acid modification	4/1464	31/18866	0.217066	0.992895	0.981064	AGBL3/TPGS1/TTLL10/TTLL9	4
BP	GO:0021799	cerebral cortex radially oriented cell migration	4/1464	31/18866	0.217066	0.992895	0.981064	SUN1/SYNE2/NDEL1/DAB2IP	4
BP	GO:0039528	cytoplasmic pattern recognition receptor signaling pathway in response to virus	4/1464	31/18866	0.217066	0.992895	0.981064	RNF135/ZCCHC3/SEC14L1/IRF7	4
BP	GO:0050650	chondroitin sulfate proteoglycan biosynthetic process	4/1464	31/18866	0.217066	0.992895	0.981064	B3GALT6/CHST12/BCAN/NCAN	4
BP	GO:0050686	negative regulation of mRNA processing	4/1464	31/18866	0.217066	0.992895	0.981064	SRSF6/PCBP4/U2AF2/CDK9	4
BP	GO:0050858	negative regulation of antigen receptor-mediated signaling pathway	4/1464	31/18866	0.217066	0.992895	0.981064	FCGR2B/PVRIG/PTPN22/CD300A	4
BP	GO:0050974	detection of mechanical stimulus involved in sensory perception	4/1464	31/18866	0.217066	0.992895	0.981064	CXCR4/CHRNA10/KCNA1/CXCL12	4
BP	GO:0060292	long-term synaptic depression	4/1464	31/18866	0.217066	0.992895	0.981064	KCNB1/PPP1R9A/CD38/PICK1	4
BP	GO:0099068	postsynapse assembly	4/1464	31/18866	0.217066	0.992895	0.981064	LRFN4/LRFN1/LRP4/GAP43	4
BP	GO:1900181	negative regulation of protein localization to nucleus	4/1464	31/18866	0.217066	0.992895	0.981064	LZTS2/APOD/POLR1A/ANGPT1	4
BP	GO:0007093	mitotic cell cycle checkpoint	16/1464	166/18866	0.217564	0.992895	0.981064	PCBP4/MAD1L1/INTS3/CDK5RAP3/KNTC1/RAD9A/GIGYF2/EME2/MDC1/PML/MDM4/TICRR/EP300/PPP1R10/PIDD1/FBXO31	16
BP	GO:0006476	protein deacetylation	10/1464	97/18866	0.219217	0.992895	0.981064	CTBP1/SIN3B/NEK3/AKAP8L/EP300/AKAP8/HDAC5/MTA1/BAZ2A/SIRT6	10
BP	GO:0032651	regulation of interleukin-1 beta production	10/1464	97/18866	0.219217	0.992895	0.981064	LILRA2/IFI16/CCR7/SMAD3/NLRP1/ARRB2/MEFV/CPTP/NOD1/IL17A	10
BP	GO:0036473	cell death in response to oxidative stress	10/1464	97/18866	0.219217	0.992895	0.981064	TSC1/NOX1/HGF/TRAP1/ATF4/STK25/PML/PDE8A/STK24/RNF112	10
BP	GO:0043648	dicarboxylic acid metabolic process	10/1464	97/18866	0.219217	0.992895	0.981064	FOLR2/ADHFE1/D2HGDH/ME2/HOGA1/SLC46A1/TH/ACMSD/OGDH/FOLR1	10
BP	GO:1990823	response to leukemia inhibitory factor	10/1464	97/18866	0.219217	0.992895	0.981064	JARID2/RNMT/TRIM25/MAT2A/ARID5B/BCAT2/PML/SRM/ABCD4/BSPRY	10
BP	GO:1990830	cellular response to leukemia inhibitory factor	10/1464	97/18866	0.219217	0.992895	0.981064	JARID2/RNMT/TRIM25/MAT2A/ARID5B/BCAT2/PML/SRM/ABCD4/BSPRY	10
BP	GO:0000028	ribosomal small subunit assembly	3/1464	21/18866	0.220104	0.992895	0.981064	PWP2/RPS28/RPL38	3
BP	GO:0006837	serotonin transport	3/1464	21/18866	0.220104	0.992895	0.981064	NOS1/P2RX1/HRH3	3
BP	GO:0016075	rRNA catabolic process	3/1464	21/18866	0.220104	0.992895	0.981064	DIS3L/EXOSC6/EXOSC7	3
BP	GO:0016973	poly(A)+ mRNA export from nucleus	3/1464	21/18866	0.220104	0.992895	0.981064	NXF1/POLDIP3/PABPN1	3
BP	GO:0030220	platelet formation	3/1464	21/18866	0.220104	0.992895	0.981064	MPL/EP300/NBEAL2	3
BP	GO:0032482	Rab protein signal transduction	3/1464	21/18866	0.220104	0.992895	0.981064	RAB12/DENND4B/MADD	3
BP	GO:0045943	positive regulation of transcription by RNA polymerase I	3/1464	21/18866	0.220104	0.992895	0.981064	DHX33/DDX11/ATF4	3
BP	GO:0051797	regulation of hair follicle development	3/1464	21/18866	0.220104	0.992895	0.981064	WNT10B/NUMA1/MYSM1	3
BP	GO:0070734	histone H3-K27 methylation	3/1464	21/18866	0.220104	0.992895	0.981064	EZH1/OGT/EHMT2	3
BP	GO:0072111	cell proliferation involved in kidney development	3/1464	21/18866	0.220104	0.992895	0.981064	SHH/GPC3/MYC	3
BP	GO:0090312	positive regulation of protein deacetylation	3/1464	21/18866	0.220104	0.992895	0.981064	CTBP1/AKAP8L/AKAP8	3
BP	GO:0098698	postsynaptic specialization assembly	3/1464	21/18866	0.220104	0.992895	0.981064	LRFN4/LRFN1/GAP43	3
BP	GO:0098780	response to mitochondrial depolarisation	3/1464	21/18866	0.220104	0.992895	0.981064	VPS13C/ATG14/CDC37	3
BP	GO:1900543	negative regulation of purine nucleotide metabolic process	3/1464	21/18866	0.220104	0.992895	0.981064	NCOR1/SLC4A1/SIRT6	3
BP	GO:1902307	positive regulation of sodium ion transmembrane transport	3/1464	21/18866	0.220104	0.992895	0.981064	WNK2/NOS1/ATP1B2	3
BP	GO:1902548	negative regulation of cellular response to vascular endothelial growth factor stimulus	3/1464	21/18866	0.220104	0.992895	0.981064	HRG/DAB2IP/XDH	3
BP	GO:2000737	negative regulation of stem cell differentiation	3/1464	21/18866	0.220104	0.992895	0.981064	CDK13/PRICKLE1/ZFP36L2	3
BP	GO:0009896	positive regulation of catabolic process	40/1464	454/18866	0.221108	0.992895	0.981064	TSC1/CPT1A/DVL1/CALCOCO2/TRIM27/VPS13C/TRIM22/YTHDF1/DXO/GIGYF2/PRICKLE1/GPC3/BAG6/RAB12/TRIB2/HSF1/OSBPL7/DND1/TNRC6A/TPCN1/DAB2IP/PNPLA2/SESN1/RALB/MEFV/SUPV3L1/RHBDD3/PLIN5/GGA1/NOD1/TICAM1/KAT5/ZFP36L2/METTL3/SEC22B/STK11/PLEKHN1/CDC37/ROCK2/SIRT6	40
BP	GO:0003018	vascular process in circulatory system	18/1464	190/18866	0.221246	0.992895	0.981064	BCR/FGB/NOS1/P2RY1/BBS2/PDE2A/TJP3/P2RX1/OCLN/CD38/ATP1A2/PLA2G6/NPPA/KNG1/ANGPT1/ROCK2/MYLK3/CXCR2	18
BP	GO:0050772	positive regulation of axonogenesis	9/1464	86/18866	0.222252	0.992895	0.981064	GOLGA4/TRAK1/NDEL1/ZFYVE27/MEGF8/STK25/STK11/CXCL12/LPAR3	9
BP	GO:1990845	adaptive thermogenesis	15/1464	155/18866	0.222324	0.992895	0.981064	CXCR4/WNT10B/PRKAB2/OGT/PPARGC1B/NOVA2/ADIPOQ/HSF1/FABP4/IP6K1/ATF4/STK11/STAT6/CIDEA/SIRT6	15
BP	GO:1901605	alpha-amino acid metabolic process	19/1464	202/18866	0.222602	0.992895	0.981064	CSAD/IVD/DCT/ADHFE1/CARNS1/ACAT1/NOS1/HOGA1/ILVBL/ATF4/MPST/TH/BCAT2/ACMSD/MCCC2/MCCC1/OGDH/AMT/PHYKPL	19
BP	GO:0031346	positive regulation of cell projection organization	35/1464	394/18866	0.224049	0.992895	0.981064	GOLGA4/ITSN1/CXCR4/TRAK1/KAT2A/DVL1/PARP6/WRAP73/CCR7/CBFA2T2/SS18L1/CAPRIN2/HGF/PPP1R9A/PROM2/NDEL1/AVIL/RREB1/ZFYVE27/MEGF8/SETX/DAB2IP/TAPT1/OCLN/STK25/RASAL1/RET/CUL7/EP300/STK11/CXCL12/CREB3L2/ATP1B2/LPAR3/FBXO31	35
BP	GO:0000266	mitochondrial fission	5/1464	42/18866	0.224212	0.992895	0.981064	MYO19/MIEF1/STAT2/MX2/DHODH	5
BP	GO:0002707	negative regulation of lymphocyte mediated immunity	5/1464	42/18866	0.224212	0.992895	0.981064	THOC1/CLEC4G/FCGR2B/PARP3/ARRB2	5
BP	GO:0006509	membrane protein ectodomain proteolysis	5/1464	42/18866	0.224212	0.992895	0.981064	TIMP4/NCSTN/APH1A/LRIG2/SPPL2B	5
BP	GO:0009268	response to pH	5/1464	42/18866	0.224212	0.992895	0.981064	HVCN1/LGMN/NOX1/ASIC1/MCOLN1	5
BP	GO:0019985	translesion synthesis	5/1464	42/18866	0.224212	0.992895	0.981064	TRIM25/POLDIP2/ISG15/PARP10/POLI	5
BP	GO:0021795	cerebral cortex cell migration	5/1464	42/18866	0.224212	0.992895	0.981064	SUN1/SYNE2/NDEL1/DAB2IP/EFHC1	5
BP	GO:0046621	negative regulation of organ growth	5/1464	42/18866	0.224212	0.992895	0.981064	RBP4/JARID2/TP73/STK4/FXN	5
BP	GO:0071470	cellular response to osmotic stress	5/1464	42/18866	0.224212	0.992895	0.981064	RCSD1/SLC25A23/LRRC8E/EFHD1/CAPN3	5
BP	GO:0072595	maintenance of protein localization in organelle	5/1464	42/18866	0.224212	0.992895	0.981064	SUN1/SUPT7L/TAPT1/PML/NR5A1	5
BP	GO:1900371	regulation of purine nucleotide biosynthetic process	5/1464	42/18866	0.224212	0.992895	0.981064	PDK4/GUCA1C/NOS1/PDPR/PDK2	5
BP	GO:0021510	spinal cord development	11/1464	109/18866	0.224536	0.992895	0.981064	SOX6/SOX12/DAAM2/SHH/GIGYF2/GDNF/MPST/DLL1/TULP3/NPFF/GDF11	11
BP	GO:0032869	cellular response to insulin stimulus	21/1464	226/18866	0.224568	0.992895	0.981064	PDK4/TSC1/C2CD5/SRSF5/PRKCB/OGT/PKLR/NDEL1/SERPINA12/RAB12/ADIPOQ/CAPN10/SH2B2/MZB1/SORBS1/ATP6V0A1/ZDHHC7/RAB8A/HDAC5/PDK2/CPEB2	21
BP	GO:0031100	animal organ regeneration	8/1464	75/18866	0.224749	0.992895	0.981064	SRSF5/HGF/UPF2/CSNK2B/PGF/GLI1/AXL/CXCL12	8
BP	GO:0072088	nephron epithelium morphogenesis	8/1464	75/18866	0.224749	0.992895	0.981064	LAMA5/SHH/LZTS2/GPC3/PGF/GDNF/HOXA11/MYC	8
BP	GO:1900006	positive regulation of dendrite development	8/1464	75/18866	0.224749	0.992895	0.981064	ITSN1/PARP6/SS18L1/CAPRIN2/PPP1R9A/DAB2IP/CUL7/FBXO31	8
BP	GO:1901983	regulation of protein acetylation	8/1464	75/18866	0.224749	0.992895	0.981064	KAT2A/CTBP1/NOS1/SETD5/GLYR1/KLF15/KAT5/KMT2A	8
BP	GO:0007265	Ras protein signal transduction	31/1464	346/18866	0.22573	0.992895	0.981064	BCR/NISCH/STMN3/RASGRP2/ARHGEF18/OGT/SETDB1/RREB1/ARFGAP1/RAB12/RASSF1/DENND4B/ABL1/FLOT1/LZTR1/DAB2IP/LRRC59/RALB/DOK3/STK19/RASAL1/PSD4/RGL2/EPOR/RASGRP4/STARD13/ARHGAP17/ROCK2/RAF1/MADD/MYOC	31
BP	GO:0001885	endothelial cell development	7/1464	64/18866	0.226375	0.992895	0.981064	HAPLN2/IKBKB/PDE2A/TJP3/FASN/ROCK2/ADD1	7
BP	GO:0042130	negative regulation of T cell proliferation	7/1464	64/18866	0.226375	0.992895	0.981064	VSIG4/MAD1L1/CLEC4G/SHH/SCRIB/VTCN1/PDE5A	7
BP	GO:0044783	G1 DNA damage checkpoint	7/1464	64/18866	0.226375	0.992895	0.981064	PCBP4/GIGYF2/PML/MDM4/EP300/PIDD1/FBXO31	7
BP	GO:0044819	mitotic G1/S transition checkpoint	7/1464	64/18866	0.226375	0.992895	0.981064	PCBP4/GIGYF2/PML/MDM4/EP300/PIDD1/FBXO31	7
BP	GO:0032943	mononuclear cell proliferation	26/1464	286/18866	0.226462	0.992895	0.981064	CD209/VSIG4/DNAJA3/MAD1L1/CLEC4G/SHH/SCRIB/FCGR2B/CARD11/SLC39A10/NCSTN/MPL/MZB1/ABL1/CD38/TIRAP/TNFSF8/ZNF335/TICAM1/IFNA4/PTPN22/RPS3/VTCN1/CD320/CD300A/PDE5A	26
BP	GO:0000731	DNA synthesis involved in DNA repair	6/1464	53/18866	0.226556	0.992895	0.981064	WRNIP1/TRIM25/POLDIP2/ISG15/PARP10/POLI	6
BP	GO:0032210	regulation of telomere maintenance via telomerase	6/1464	53/18866	0.226556	0.992895	0.981064	CTC1/HNRNPA1/HMBOX1/MAP3K4/HNRNPC/PIF1	6
BP	GO:0032731	positive regulation of interleukin-1 beta production	6/1464	53/18866	0.226556	0.992895	0.981064	LILRA2/IFI16/SMAD3/NLRP1/NOD1/IL17A	6
BP	GO:0043949	regulation of cAMP-mediated signaling	6/1464	53/18866	0.226556	0.992895	0.981064	GIPR/NOS1/MRAP/PDE2A/PRKAR1B/MGRN1	6
BP	GO:0045599	negative regulation of fat cell differentiation	6/1464	53/18866	0.226556	0.992895	0.981064	WNT10B/SMAD3/ADIPOQ/TRIB2/CCDC85B/ZFP36L2	6
BP	GO:0072698	protein localization to microtubule cytoskeleton	6/1464	53/18866	0.226556	0.992895	0.981064	DVL1/WRAP73/CEP192/NUMA1/KIAA0753/TTBK2	6
BP	GO:0097035	regulation of membrane lipid distribution	6/1464	53/18866	0.226556	0.992895	0.981064	GBA2/XKR8/ABCC1/XKR6/ATP8B1/SLC4A1	6
BP	GO:1900024	regulation of substrate adhesion-dependent cell spreading	6/1464	53/18866	0.226556	0.992895	0.981064	FGB/LIMS2/RREB1/ABL1/TRIOBP/MYOC	6
BP	GO:0002218	activation of innate immune response	14/1464	144/18866	0.227191	0.992895	0.981064	CD209/LILRA2/ZCCHC3/IFI16/CLEC10A/CARD11/IKBKB/ICAM2/TAB1/EP300/PRKACA/ZBP1/MAVS/RAF1	14
BP	GO:0022408	negative regulation of cell-cell adhesion	18/1464	191/18866	0.227807	0.992895	0.981064	MAP2K5/VSIG4/MAD1L1/CLEC4G/SHH/PPM1F/SCRIB/FCGR2B/ADIPOQ/ABL1/IFNL1/METTL3/PTPN22/VTCN1/CXCL12/CD300A/PDE5A/MIA3	18
BP	GO:0002832	negative regulation of response to biotic stimulus	10/1464	98/18866	0.228487	0.992895	0.981064	LILRA2/VSIG4/IFI16/NLRC3/SEC14L1/TTLL12/CACTIN/ARRB2/METTL3/ADAR	10
BP	GO:0006942	regulation of striated muscle contraction	10/1464	98/18866	0.228487	0.992895	0.981064	GSTM2/NOS1/KCNJ2/TNNI3/ATP1A2/NPPA/PRKACA/BMP10/DMPK/PDE5A	10
BP	GO:0045833	negative regulation of lipid metabolic process	10/1464	98/18866	0.228487	0.992895	0.981064	ACADVL/NCOR1/SERPINA12/ACACB/APOD/DAB2IP/PLIN5/SCAP/CIDEA/ORMDL1	10
BP	GO:0006865	amino acid transport	15/1464	156/18866	0.229634	0.992895	0.981064	SLC7A8/SLC38A5/SLC7A6/SLC25A45/SFXN4/LLGL2/SLC38A1/SLC6A18/SLC43A1/LRRC8E/ATP1A2/SLC38A7/SFXN5/HRH3/SLC7A4	15
BP	GO:0043281	regulation of cysteine-type endopeptidase activity involved in apoptotic process	20/1464	215/18866	0.229905	0.992895	0.981064	HIP1/MAP2K5/PPM1F/SMAD3/GRAMD4/HGF/HSF1/NLRP1/P2RX1/ARRB2/CASP10/PML/NOD1/MTCH1/RPS3/MYC/PIDD1/UACA/RAF1/XDH	20
BP	GO:0002833	positive regulation of response to biotic stimulus	23/1464	251/18866	0.231513	0.992895	0.981064	CD209/COCH/LILRA2/ZCCHC3/IFI16/HRG/CLEC10A/CARD11/IKBKB/ICAM2/SLAMF6/TAB1/NLRP10/SIGLEC16/IRF7/NOD1/EP300/PRKACA/ZBP1/MAVS/POLR3D/RAF1/DHX9	23
BP	GO:0043087	regulation of GTPase activity	42/1464	481/18866	0.232124	0.992895	0.981064	TBC1D14/ADAP2/TSC1/BCR/ACAP3/STMN3/CCR7/FGD2/RASGRP2/TBC1D1/TBC1D9B/CCL13/RICTOR/RALGAPB/LLGL2/SGSM2/SCRIB/ARHGEF15/PROM2/NDEL1/ARFGAP1/TBC1D17/RABGAP1/RABEP2/RALBP1/DAB2IP/CCL16/TNK2/ARRB2/RASAL1/TBC1D5/GARNL3/GIT1/STXBP5L/STARD13/ARHGAP17/GIT2/CCL8/SBF1/FGD3/CPEB2/ARHGEF16	42
BP	GO:0001942	hair follicle development	9/1464	87/18866	0.2322	0.992895	0.981064	LAMA5/FZD3/SHH/WNT10B/DNASE1L2/NUMA1/TNFRSF19/MYSM1/LRP4	9
BP	GO:0048013	ephrin receptor signaling pathway	9/1464	87/18866	0.2322	0.992895	0.981064	EPHA8/ITSN1/APH1B/AP2A2/EPHA10/NCSTN/GIT1/APH1A/ROCK2	9
BP	GO:1903363	negative regulation of cellular protein catabolic process	9/1464	87/18866	0.2322	0.992895	0.981064	SHH/CDK5RAP3/USP7/OGT/BAG6/ATP13A2/DAB2IP/USP19/PML	9
BP	GO:0006631	fatty acid metabolic process	35/1464	396/18866	0.233196	0.992895	0.981064	PDK4/CPT1A/IVD/ECI2/GSTM2/PRKAB2/ACADVL/ACSS1/ACAT1/NCOR1/PDPR/GSTM4/ECI1/ADIPOQ/GSTM1/ACACB/ILVBL/MGLL/SLC27A3/TH/CYP2A6/CYP2C9/CYP2C8/PLIN5/SCAP/ACOT6/FASN/ACSBG2/PLA2G15/ECH1/CYP2A7/PDK2/ABCD4/ECHDC2/TECR	35
BP	GO:0010959	regulation of metal ion transport	35/1464	396/18866	0.233196	0.992895	0.981064	HOMER3/LILRA2/CXCR4/TRIM27/WNK2/EPB41/GSTM2/CAMK2G/CACNG6/NOS1/KCNJ2/KCNIP3/FXYD7/ABL1/P2RX1/ATF4/ARRB2/DPP6/ATP1A2/PLA2G6/KCNIP2/NPPA/PML/KCNS1/PRKACA/KCNAB2/BEST1/KCNA1/DMPK/CACNB2/CXCL12/ATP1B2/GPD1L/CAPN3/LPAR3	35
BP	GO:0006900	vesicle budding from membrane	11/1464	110/18866	0.233364	0.992895	0.981064	SEC16B/GORASP1/SEC31B/SEC16A/SCAP/SEC22B/FOLR1/MX2/SEC24C/MIA3/AP3D1	11
BP	GO:0006506	GPI anchor biosynthetic process	4/1464	32/18866	0.234053	0.992895	0.981064	PIGG/PIGL/PIGS/PIGB	4
BP	GO:0008210	estrogen metabolic process	4/1464	32/18866	0.234053	0.992895	0.981064	HSD17B7/SULT1A1/CYP2C9/CYP2C8	4
BP	GO:0034694	response to prostaglandin	4/1464	32/18866	0.234053	0.992895	0.981064	CCR7/AKAP8/P2RY4/PTGER2	4
BP	GO:0042168	heme metabolic process	4/1464	32/18866	0.234053	0.992895	0.981064	PPOX/AMBP/FXN/ALAS2	4
BP	GO:0046949	fatty-acyl-CoA biosynthetic process	4/1464	32/18866	0.234053	0.992895	0.981064	ACAT1/FASN/ACSBG2/TECR	4
BP	GO:0048841	regulation of axon extension involved in axon guidance	4/1464	32/18866	0.234053	0.992895	0.981064	SEMA3G/MEGF8/SEMA3B/CXCL12	4
BP	GO:0050869	negative regulation of B cell activation	4/1464	32/18866	0.234053	0.992895	0.981064	THOC1/FCGR2B/PARP3/CD300A	4
BP	GO:0060603	mammary gland duct morphogenesis	4/1464	32/18866	0.234053	0.992895	0.981064	LRP5L/SCRIB/LRP5/PML	4
BP	GO:0071353	cellular response to interleukin-4	4/1464	32/18866	0.234053	0.992895	0.981064	MRC1/PML/FASN/STAT6	4
BP	GO:0098810	neurotransmitter reuptake	4/1464	32/18866	0.234053	0.992895	0.981064	SLC29A2/NOS1/GDNF/ATP1A2	4
BP	GO:1902547	regulation of cellular response to vascular endothelial growth factor stimulus	4/1464	32/18866	0.234053	0.992895	0.981064	HRG/DAB2IP/DLL1/XDH	4
BP	GO:1903955	positive regulation of protein targeting to mitochondrion	4/1464	32/18866	0.234053	0.992895	0.981064	HPS4/UBL4B/ABLIM3/USP36	4
BP	GO:0001818	negative regulation of cytokine production	32/1464	360/18866	0.235016	0.992895	0.981064	HOMER3/RNF135/MAP2K5/VSIG4/KLF2/TRIM27/CCR7/NLRC3/TRIM25/HGF/FCGR2B/C1QTNF3/ADIPOQ/TRIB2/MMP8/HSF1/CACTIN/APOD/IFNL1/ARRB2/MEFV/ISG15/SSC5D/CPTP/DLL1/KAT5/AKAP8/AXL/PTPN22/BST2/MAVS/CIDEA	32
BP	GO:0032956	regulation of actin cytoskeleton organization	32/1464	360/18866	0.235016	0.992895	0.981064	GBA2/TSC1/TRIM27/SSH3/CCR7/PPM1F/RICTOR/ARHGEF18/HRG/SMAD3/PPP1R9A/CDK10/ARHGEF15/SSH2/AVIL/TESK1/ABL1/CCL27/PICK1/TRIOBP/PLEKHH2/ARHGAP17/BST2/BMP10/ROCK2/CXCL12/FLII/SPTBN1/ACTR3B/MYOC/MYLK3/ADD1	32
BP	GO:0006278	RNA-dependent DNA biosynthetic process	8/1464	76/18866	0.235503	0.992895	0.981064	TERT/TELO2/CTC1/HNRNPA1/HMBOX1/MAP3K4/HNRNPC/PIF1	8
BP	GO:0051258	protein polymerization	27/1464	300/18866	0.237081	0.992895	0.981064	GBA2/RNF135/SLC39A12/CEP192/TRIM27/SSH3/CCR7/FGB/RICTOR/PPP1R9A/SSH2/NDEL1/AVIL/NUMA1/ABL1/OCLN/PICK1/PSRC1/TRIOBP/MX2/FKBP4/RPS3/CORO7/FLII/SPTBN1/ACTR3B/ADD1	27
BP	GO:0048863	stem cell differentiation	24/1464	264/18866	0.237432	0.992895	0.981064	LAMA5/SOX6/CHD2/CDK13/SHH/JARID2/TP73/PRICKLE1/SEMA3G/ABL1/GDNF/TAPT1/ALDH1A2/RET/SEMA3B/MSI2/NOLC1/ZFP36L2/METTL3/FOLR1/SETD6/EIF2AK2/SIX3/KMT2A	24
BP	GO:0000185	activation of MAPKKK activity	2/1464	12/18866	0.237678	0.992895	0.981064	DAB2IP/TAB1	2
BP	GO:0001768	establishment of T cell polarity	2/1464	12/18866	0.237678	0.992895	0.981064	CCR7/SCRIB	2
BP	GO:0006069	ethanol oxidation	2/1464	12/18866	0.237678	0.992895	0.981064	ADH1B/ACSS1	2
BP	GO:0006534	cysteine metabolic process	2/1464	12/18866	0.237678	0.992895	0.981064	CSAD/MPST	2
BP	GO:0006554	lysine catabolic process	2/1464	12/18866	0.237678	0.992895	0.981064	OGDH/PHYKPL	2
BP	GO:0007077	mitotic nuclear envelope disassembly	2/1464	12/18866	0.237678	0.992895	0.981064	NEK9/PRKCB	2
BP	GO:0009071	serine family amino acid catabolic process	2/1464	12/18866	0.237678	0.992895	0.981064	CSAD/AMT	2
BP	GO:0010960	magnesium ion homeostasis	2/1464	12/18866	0.237678	0.992895	0.981064	TRPM7/KCNA1	2
BP	GO:0021670	lateral ventricle development	2/1464	12/18866	0.237678	0.992895	0.981064	NUMB/ATP1B2	2
BP	GO:0032957	inositol trisphosphate metabolic process	2/1464	12/18866	0.237678	0.992895	0.981064	P2RY1/ITPK1	2
BP	GO:0033182	regulation of histone ubiquitination	2/1464	12/18866	0.237678	0.992895	0.981064	CDK9/UBR5	2
BP	GO:0033690	positive regulation of osteoblast proliferation	2/1464	12/18866	0.237678	0.992895	0.981064	LRP5/ABL1	2
BP	GO:0034497	protein localization to phagophore assembly site	2/1464	12/18866	0.237678	0.992895	0.981064	PACS2/STX17	2
BP	GO:0035845	photoreceptor cell outer segment organization	2/1464	12/18866	0.237678	0.992895	0.981064	NPHP4/IFT140	2
BP	GO:0043383	negative T cell selection	2/1464	12/18866	0.237678	0.992895	0.981064	CCR7/SHH	2
BP	GO:0044650	adhesion of symbiont to host cell	2/1464	12/18866	0.237678	0.992895	0.981064	CD209/CLEC4M	2
BP	GO:0045117	azole transmembrane transport	2/1464	12/18866	0.237678	0.992895	0.981064	SLC38A5/SLC38A7	2
BP	GO:0045144	meiotic sister chromatid segregation	2/1464	12/18866	0.237678	0.992895	0.981064	REC8/HORMAD2	2
BP	GO:0046929	negative regulation of neurotransmitter secretion	2/1464	12/18866	0.237678	0.992895	0.981064	PPP1R9A/ASIC1	2
BP	GO:0051013	microtubule severing	2/1464	12/18866	0.237678	0.992895	0.981064	LZTS2/KATNAL2	2
BP	GO:0051177	meiotic sister chromatid cohesion	2/1464	12/18866	0.237678	0.992895	0.981064	REC8/HORMAD2	2
BP	GO:0051798	positive regulation of hair follicle development	2/1464	12/18866	0.237678	0.992895	0.981064	WNT10B/NUMA1	2
BP	GO:0060736	prostate gland growth	2/1464	12/18866	0.237678	0.992895	0.981064	UBE3A/SHH	2
BP	GO:0061365	positive regulation of triglyceride lipase activity	2/1464	12/18866	0.237678	0.992895	0.981064	GPIHBP1/LMF1	2
BP	GO:0061709	reticulophagy	2/1464	12/18866	0.237678	0.992895	0.981064	UFC1/ATG2A	2
BP	GO:0070572	positive regulation of neuron projection regeneration	2/1464	12/18866	0.237678	0.992895	0.981064	HGF/NDEL1	2
BP	GO:0070586	cell-cell adhesion involved in gastrulation	2/1464	12/18866	0.237678	0.992895	0.981064	MAP2K5/ADIPOQ	2
BP	GO:0070816	phosphorylation of RNA polymerase II C-terminal domain	2/1464	12/18866	0.237678	0.992895	0.981064	CDK13/CDK9	2
BP	GO:0071107	response to parathyroid hormone	2/1464	12/18866	0.237678	0.992895	0.981064	WNT10B/PRKACA	2
BP	GO:0071679	commissural neuron axon guidance	2/1464	12/18866	0.237678	0.992895	0.981064	FZD3/GDNF	2
BP	GO:0072531	pyrimidine-containing compound transmembrane transport	2/1464	12/18866	0.237678	0.992895	0.981064	SLC29A2/SLC25A36	2
BP	GO:0072537	fibroblast activation	2/1464	12/18866	0.237678	0.992895	0.981064	ULK3/IL17A	2
BP	GO:0072584	caveolin-mediated endocytosis	2/1464	12/18866	0.237678	0.992895	0.981064	ITSN1/PROM2	2
BP	GO:0072711	cellular response to hydroxyurea	2/1464	12/18866	0.237678	0.992895	0.981064	DDX11/SPIDR	2
BP	GO:0090154	positive regulation of sphingolipid biosynthetic process	2/1464	12/18866	0.237678	0.992895	0.981064	NSMAF/PLA2G6	2
BP	GO:0099149	regulation of postsynaptic neurotransmitter receptor internalization	2/1464	12/18866	0.237678	0.992895	0.981064	SCRIB/NUMB	2
BP	GO:0099151	regulation of postsynaptic density assembly	2/1464	12/18866	0.237678	0.992895	0.981064	LRFN4/LRFN1	2
BP	GO:1901298	regulation of hydrogen peroxide-mediated programmed cell death	2/1464	12/18866	0.237678	0.992895	0.981064	HGF/TRAP1	2
BP	GO:1902018	negative regulation of cilium assembly	2/1464	12/18866	0.237678	0.992895	0.981064	TCHP/CDK10	2
BP	GO:1902224	ketone body metabolic process	2/1464	12/18866	0.237678	0.992895	0.981064	ACAT1/BDH1	2
BP	GO:1903909	regulation of receptor clustering	2/1464	12/18866	0.237678	0.992895	0.981064	LRP4/SHISA6	2
BP	GO:1905461	positive regulation of vascular associated smooth muscle cell apoptotic process	2/1464	12/18866	0.237678	0.992895	0.981064	ATF4/STK4	2
BP	GO:1905941	positive regulation of gonad development	2/1464	12/18866	0.237678	0.992895	0.981064	RETN/NR5A1	2
BP	GO:2000304	positive regulation of ceramide biosynthetic process	2/1464	12/18866	0.237678	0.992895	0.981064	NSMAF/PLA2G6	2
BP	GO:2000767	positive regulation of cytoplasmic translation	2/1464	12/18866	0.237678	0.992895	0.981064	METTL3/DHX9	2
BP	GO:0006626	protein targeting to mitochondrion	10/1464	99/18866	0.237905	0.992895	0.981064	HPS4/CHCHD4/UBL4B/TOMM40/ABLIM3/SLC25A6/GRPEL1/USP36/PAM16/TIMM23B	10
BP	GO:1905037	autophagosome organization	10/1464	99/18866	0.237905	0.992895	0.981064	TBC1D14/ATG16L2/PACS2/ATP13A2/STX17/RALB/ATG14/SEC22B/ATG2A/ATG16L1	10
BP	GO:0030837	negative regulation of actin filament polymerization	7/1464	65/18866	0.238115	0.992895	0.981064	SSH3/SSH2/AVIL/TRIOBP/FLII/SPTBN1/ADD1	7
BP	GO:0006066	alcohol metabolic process	34/1464	385/18866	0.238557	0.992895	0.981064	NUDT3/GBA2/INPP5E/CHKA/ADH1B/PTH1R/RBP4/IP6K2/DGKQ/SULT1A2/HSD17B7/SULT1A1/ACADVL/ACSS1/LRP5/SULT1C4/P2RY1/SERPINA12/ACACB/IP6K1/PGP/PNPLA2/ALDH1A2/ITPK1/CYP2C9/CYP2C8/RETSAT/NFYC/SCAP/FASN/PLCB2/CACNA1H/RDH13/LMF1	34
BP	GO:0008631	intrinsic apoptotic signaling pathway in response to oxidative stress	5/1464	43/18866	0.238849	0.992895	0.981064	NOX1/TRAP1/STK25/PML/STK24	5
BP	GO:0045773	positive regulation of axon extension	5/1464	43/18866	0.238849	0.992895	0.981064	GOLGA4/NDEL1/ZFYVE27/MEGF8/CXCL12	5
BP	GO:0061462	protein localization to lysosome	5/1464	43/18866	0.238849	0.992895	0.981064	SZT2/ATP13A2/NUMA1/ROCK2/AP3D1	5
BP	GO:1901031	regulation of response to reactive oxygen species	5/1464	43/18866	0.238849	0.992895	0.981064	SZT2/HGF/TRAP1/SESN1/PDE8A	5
BP	GO:0006749	glutathione metabolic process	6/1464	54/18866	0.239542	0.992895	0.981064	GSTM2/GLO1/MMACHC/GSTM4/GSTM1/OPLAH	6
BP	GO:0030834	regulation of actin filament depolymerization	6/1464	54/18866	0.239542	0.992895	0.981064	AVIL/TRIOBP/PLEKHH2/FLII/SPTBN1/ADD1	6
BP	GO:0032757	positive regulation of interleukin-8 production	6/1464	54/18866	0.239542	0.992895	0.981064	ADIPOQ/ZNF580/NLRP10/IL17D/TIRAP/MAVS	6
BP	GO:0002097	tRNA wobble base modification	3/1464	22/18866	0.24126	0.992895	0.981064	ALKBH1/GTPBP3/TRMU	3
BP	GO:0007398	ectoderm development	3/1464	22/18866	0.24126	0.992895	0.981064	VPS52/SHH/EDA2R	3
BP	GO:0036344	platelet morphogenesis	3/1464	22/18866	0.24126	0.992895	0.981064	MPL/EP300/NBEAL2	3
BP	GO:0043369	CD4-positive or CD8-positive, alpha-beta T cell lineage commitment	3/1464	22/18866	0.24126	0.992895	0.981064	SHH/SLAMF6/STAT6	3
BP	GO:0045655	regulation of monocyte differentiation	3/1464	22/18866	0.24126	0.992895	0.981064	IRF7/ACIN1/MYC	3
BP	GO:0045980	negative regulation of nucleotide metabolic process	3/1464	22/18866	0.24126	0.992895	0.981064	NCOR1/SLC4A1/SIRT6	3
BP	GO:0046058	cAMP metabolic process	3/1464	22/18866	0.24126	0.992895	0.981064	PDE8A/ADCY4/PDE7A	3
BP	GO:0048025	negative regulation of mRNA splicing, via spliceosome	3/1464	22/18866	0.24126	0.992895	0.981064	SRSF6/PCBP4/U2AF2	3
BP	GO:0050765	negative regulation of phagocytosis	3/1464	22/18866	0.24126	0.992895	0.981064	FCGR2B/ADIPOQ/CD300A	3
BP	GO:0071379	cellular response to prostaglandin stimulus	3/1464	22/18866	0.24126	0.992895	0.981064	AKAP8/P2RY4/PTGER2	3
BP	GO:1901685	glutathione derivative metabolic process	3/1464	22/18866	0.24126	0.992895	0.981064	GSTM2/GSTM4/GSTM1	3
BP	GO:1901687	glutathione derivative biosynthetic process	3/1464	22/18866	0.24126	0.992895	0.981064	GSTM2/GSTM4/GSTM1	3
BP	GO:2000479	regulation of cAMP-dependent protein kinase activity	3/1464	22/18866	0.24126	0.992895	0.981064	MST1/ADIPOQ/PRKAR1B	3
BP	GO:0070661	leukocyte proliferation	28/1464	313/18866	0.242068	0.992895	0.981064	CD209/VSIG4/DNAJA3/MAD1L1/CLEC4G/SHH/SCRIB/FCGR2B/CARD11/SLC39A10/NCSTN/MPL/MZB1/ABL1/CD38/TIRAP/TNFSF8/ZNF335/TICAM1/IFNA4/PTPN22/BST2/RPS3/CCL8/VTCN1/CD320/CD300A/PDE5A	28
BP	GO:0014068	positive regulation of phosphatidylinositol 3-kinase signaling	9/1464	88/18866	0.242306	0.992895	0.981064	UBE3A/HGF/SERPINA12/PRR5/PIK3R5/RGL2/EPOR/ANGPT1/MYOC	9
BP	GO:0070098	chemokine-mediated signaling pathway	9/1464	88/18866	0.242306	0.992895	0.981064	CXCR4/CCR7/CCL13/MPL/CCL16/GPR75/CCL8/CXCL12/CXCR2	9
BP	GO:0032652	regulation of interleukin-1 production	11/1464	111/18866	0.242323	0.992895	0.981064	LILRA2/IFI16/CCR7/SMAD3/NLRP1/ARRB2/NLRP10/MEFV/CPTP/NOD1/IL17A	11
BP	GO:0035305	negative regulation of dephosphorylation	11/1464	111/18866	0.242323	0.992895	0.981064	URI1/CEP192/IKBKB/PPP1R35/CABIN1/ARPP19/SFI1/PHACTR1/CRY2/ROCK2/PPP1R10	11
BP	GO:0042303	molting cycle	11/1464	111/18866	0.242323	0.992895	0.981064	TERT/LAMA5/FZD3/SHH/WNT10B/DNASE1L2/KRTAP4-9/NUMA1/TNFRSF19/MYSM1/LRP4	11
BP	GO:0042633	hair cycle	11/1464	111/18866	0.242323	0.992895	0.981064	TERT/LAMA5/FZD3/SHH/WNT10B/DNASE1L2/KRTAP4-9/NUMA1/TNFRSF19/MYSM1/LRP4	11
BP	GO:0048813	dendrite morphogenesis	14/1464	146/18866	0.242655	0.992895	0.981064	RERE/TRAK1/UBE3A/DVL1/PARP6/SS18L1/GORASP1/CAPRIN2/PPP1R9A/CUL7/STK11/LRP4/PHACTR1/FBXO31	14
BP	GO:0031668	cellular response to extracellular stimulus	23/1464	253/18866	0.243225	0.992895	0.981064	PDK4/TSC1/IFI16/FOLR2/KCNB1/HNRNPA1/ITGA4/SZT2/ITFG2/EHMT2/TNRC6A/SESN1/RALB/ATF4/ATG14/PICK1/AXL/FOLR1/PDK2/WDR59/EIF2AK2/MYBBP1A/STK24	23
BP	GO:0006140	regulation of nucleotide metabolic process	12/1464	123/18866	0.245766	0.992895	0.981064	PDK4/GUCA1C/OGT/NCOR1/NOS1/PDPR/SLC4A1/POM121/ACMSD/EP300/PDK2/SIRT6	12
BP	GO:0072521	purine-containing compound metabolic process	41/1464	472/18866	0.245876	0.992895	0.981064	NUDT3/PDK4/GUCA1C/SULT1A2/ADPGK/DHTKD1/FOXK1/SULT1A1/OGT/ACSS1/PKLR/ACAT1/NCOR1/NOS1/PDPR/DCAKD/CARD11/PANK4/SULT1C4/ACACB/SLC4A1/POM121/PDE2A/NPPA/MCCC2/ACOT6/OGDH/EP300/FASN/ACSBG2/ENO3/PDE8A/ADCY4/PDK2/ATP6/PRPS1L1/PDE5A/TECR/PDE7A/SIRT6/XDH	41
BP	GO:0061333	renal tubule morphogenesis	8/1464	77/18866	0.246431	0.992895	0.981064	LAMA5/SHH/LZTS2/GPC3/PGF/GDNF/HOXA11/MYC	8
BP	GO:0072028	nephron morphogenesis	8/1464	77/18866	0.246431	0.992895	0.981064	LAMA5/SHH/LZTS2/GPC3/PGF/GDNF/HOXA11/MYC	8
BP	GO:0071496	cellular response to external stimulus	29/1464	326/18866	0.246826	0.992895	0.981064	PDK4/TSC1/IFI16/FOLR2/KCNB1/HNRNPA1/ITGA4/SZT2/ITFG2/EHMT2/KCNJ2/TNRC6A/PDE2A/SESN1/RALB/ATF4/ATG14/ATP1A2/PICK1/NPPA/MAP3K1/AXL/FOLR1/PIEZO1/PDK2/WDR59/EIF2AK2/MYBBP1A/STK24	29
BP	GO:0046390	ribose phosphate biosynthetic process	18/1464	194/18866	0.247983	0.992895	0.981064	UCKL1/PDK4/ACSS1/PKLR/ACAT1/PDPR/DCAKD/PANK4/ACACB/NPPA/FASN/ACSBG2/ADCY4/PDK2/ATP6/PRPS1L1/DHODH/TECR	18
BP	GO:0097193	intrinsic apoptotic signaling pathway	26/1464	290/18866	0.248344	0.992895	0.981064	URI1/IFI16/TP73/PPM1F/NOX1/RAD9A/BAG6/ERP29/ABL1/TRAP1/DAB2IP/EDA2R/ATF4/STK25/SHISA5/LGALS12/CIDEB/PML/EP300/STK11/AEN/RPS3/PDK2/CXCL12/MYBBP1A/STK24	26
BP	GO:0003158	endothelium development	13/1464	135/18866	0.248451	0.992895	0.981064	SLC40A1/CXCR4/HAPLN2/IKBKB/PDE2A/CSNK2B/TJP3/DLL1/STARD13/FASN/ROCK2/ADD1/XDH	13
BP	GO:0006888	endoplasmic reticulum to Golgi vesicle-mediated transport	19/1464	206/18866	0.248578	0.992895	0.981064	COG8/SEC16B/LMAN1L/GORASP1/SEC31B/ARFGAP1/STX17/COG3/ERGIC3/SEC16A/SCAP/SEC22B/FOLR1/TEX261/CREB3L2/LMF1/SEC24C/MIA3/SPTBN1	19
BP	GO:0071383	cellular response to steroid hormone stimulus	19/1464	206/18866	0.248578	0.992895	0.981064	URI1/UBE3A/DDX17/NCOR1/PPARGC1B/RXRB/DNMT3B/ARRB2/ATP1A2/CALCOCO1/NR2C1/SAFB2/KMT2D/EP300/DAXX/ZFP36L2/FKBP4/UBR5/CRY2	19
BP	GO:0110053	regulation of actin filament organization	25/1464	278/18866	0.248711	0.992895	0.981064	GBA2/TSC1/TRIM27/SSH3/CCR7/PPM1F/RICTOR/ARHGEF18/SMAD3/PPP1R9A/ARHGEF15/SSH2/AVIL/TESK1/ABL1/PICK1/TRIOBP/PLEKHH2/ROCK2/CXCL12/FLII/SPTBN1/ACTR3B/MYOC/ADD1	25
BP	GO:0009165	nucleotide biosynthetic process	24/1464	266/18866	0.248992	0.992895	0.981064	UCKL1/PDK4/GUCA1C/DCTD/ACSS1/PKLR/ACAT1/NOS1/PDPR/DCAKD/PANK4/ACACB/PARP10/ACMSD/NPPA/FASN/ACSBG2/ADCY4/PDK2/ATP6/PRPS1L1/DHODH/NADK/TECR	24
BP	GO:0032922	circadian regulation of gene expression	7/1464	66/18866	0.250047	0.992895	0.981064	OGT/ATF4/PML/MTA1/CRY2/KMT2A/MYBBP1A	7
BP	GO:0034394	protein localization to cell surface	7/1464	66/18866	0.250047	0.992895	0.981064	TM9SF4/GGA1/KCNAB2/ANGPT1/LRIG2/GPIHBP1/GPD1L	7
BP	GO:0006505	GPI anchor metabolic process	4/1464	33/18866	0.251344	0.992895	0.981064	PIGG/PIGL/PIGS/PIGB	4
BP	GO:0035590	purinergic nucleotide receptor signaling pathway	4/1464	33/18866	0.251344	0.992895	0.981064	ADORA3/P2RY1/P2RX1/P2RY4	4
BP	GO:0042573	retinoic acid metabolic process	4/1464	33/18866	0.251344	0.992895	0.981064	ADH1B/CYP26A1/ALDH1A2/CYP2C8	4
BP	GO:0042755	eating behavior	4/1464	33/18866	0.251344	0.992895	0.981064	CPT1A/P2RY1/NMUR2/TH	4
BP	GO:0120255	olefinic compound biosynthetic process	4/1464	33/18866	0.251344	0.992895	0.981064	DGKQ/GSTM2/GSTM1/CACNA1H	4
BP	GO:1905508	protein localization to microtubule organizing center	4/1464	33/18866	0.251344	0.992895	0.981064	WRAP73/CEP192/NUMA1/KIAA0753	4
BP	GO:0055067	monovalent inorganic cation homeostasis	15/1464	159/18866	0.252142	0.992895	0.981064	PDK4/UBE3A/TM9SF4/NOX1/SLC12A9/KCNJ2/SLC4A1/ATP6V0A1/ATP1A2/SLC12A4/CA7/SLC9A8/PDK2/ATP1B2/C7	15
BP	GO:1903706	regulation of hemopoiesis	43/1464	498/18866	0.252267	0.992895	0.981064	C1QC/P4HTM/KAT2A/SOX12/SLC9B2/BRD1/L3MBTL1/SHH/TP73/PRKCB/FCGR2B/TCTA/CARD11/PPARGC1B/ADIPOQ/MPL/TNRC6A/AGO4/PIK3R6/ABL1/IFNL1/IL17D/ISG15/FAXDC2/IRF7/KMT2D/DLL1/KLF13/EP300/ANKRD54/ZFP36L2/IL17A/METTL3/AXL/MYSM1/MTURN/ACIN1/KMT2B/IL20/EIF2AK2/MYC/KMT2A/AP3D1	43
BP	GO:0022404	molting cycle process	9/1464	89/18866	0.252562	0.992895	0.981064	LAMA5/FZD3/SHH/WNT10B/DNASE1L2/NUMA1/TNFRSF19/MYSM1/LRP4	9
BP	GO:0022405	hair cycle process	9/1464	89/18866	0.252562	0.992895	0.981064	LAMA5/FZD3/SHH/WNT10B/DNASE1L2/NUMA1/TNFRSF19/MYSM1/LRP4	9
BP	GO:0006120	mitochondrial electron transport, NADH to ubiquinone	6/1464	55/18866	0.252744	0.992895	0.981064	ND2/COQ9/ND4/NDUFA10/NDUFS2/NDUFAF1	6
BP	GO:0007131	reciprocal meiotic recombination	6/1464	55/18866	0.252744	0.992895	0.981064	C11orf80/UBR2/REC8/RAD51D/EME2/CORT	6
BP	GO:0014888	striated muscle adaptation	6/1464	55/18866	0.252744	0.992895	0.981064	CAMK2G/SMAD3/KLF15/NPPA/BMP10/MYOC	6
BP	GO:0035065	regulation of histone acetylation	6/1464	55/18866	0.252744	0.992895	0.981064	KAT2A/CTBP1/NOS1/SETD5/GLYR1/KMT2A	6
BP	GO:0050433	regulation of catecholamine secretion	6/1464	55/18866	0.252744	0.992895	0.981064	SYT15/KCNB1/P2RY1/GDNF/HRH3/CXCL12	6
BP	GO:0045005	DNA-dependent DNA replication maintenance of fidelity	5/1464	44/18866	0.253737	0.992895	0.981064	THOC1/EME2/DDX11/CDK9/CORT	5
BP	GO:0045332	phospholipid translocation	5/1464	44/18866	0.253737	0.992895	0.981064	XKR8/ABCC1/XKR6/ATP8B1/SLC4A1	5
BP	GO:0050654	chondroitin sulfate proteoglycan metabolic process	5/1464	44/18866	0.253737	0.992895	0.981064	B3GALT6/IDUA/CHST12/BCAN/NCAN	5
BP	GO:0090503	RNA phosphodiester bond hydrolysis, exonucleolytic	5/1464	44/18866	0.253737	0.992895	0.981064	PAN2/DIS3L/EXOSC6/ISG20L2/EXOSC7	5
BP	GO:0001959	regulation of cytokine-mediated signaling pathway	17/1464	183/18866	0.254244	0.992895	0.981064	CXCR4/CPNE1/TTLL12/ADIPOQ/IKBKB/CACTIN/IRF7/METTL3/AXL/CDC37/ANGPT1/ZBP1/ADAR/MAVS/SHARPIN/SPPL2B/MADD	17
BP	GO:0046031	ADP metabolic process	12/1464	124/18866	0.254435	0.992895	0.981064	ADPGK/DHTKD1/FOXK1/OGT/PKLR/NCOR1/SLC4A1/POM121/OGDH/EP300/ENO3/SIRT6	12
BP	GO:0061982	meiosis I cell cycle process	12/1464	124/18866	0.254435	0.992895	0.981064	SUN1/C11orf80/UBR2/REC8/RAD51D/EME2/BAG6/AGO4/SYCP2/CDC25B/CCNE1/CORT	12
BP	GO:0046883	regulation of hormone secretion	24/1464	267/18866	0.254859	0.992895	0.981064	ITSN1/CPT1A/RAB11FIP3/SLC9B2/RBP4/KCNB1/GIPR/FGB/LRP5L/LRP5/C1QTNF3/P2RY1/ADIPOQ/CAPN10/RETN/CD38/PLA2G6/PICK1/SLC25A6/NPPA/STXBP5L/NADK/NPFF/RASL10B	24
BP	GO:0046890	regulation of lipid biosynthetic process	19/1464	207/18866	0.255258	0.992895	0.981064	PDK4/DGKQ/PRKAB2/ACADVL/THRSP/AVIL/SERPINA12/ADIPOQ/ACACB/NSMAF/SORBS1/PLA2G6/PLIN5/NFYC/SCAP/FASN/SF1/ORMDL1/NR5A1	19
BP	GO:0032271	regulation of protein polymerization	21/1464	231/18866	0.255501	0.992895	0.981064	GBA2/SLC39A12/TRIM27/SSH3/CCR7/RICTOR/PPP1R9A/SSH2/AVIL/NUMA1/ABL1/OCLN/PICK1/PSRC1/TRIOBP/FKBP4/RPS3/FLII/SPTBN1/ACTR3B/ADD1	21
BP	GO:0009135	purine nucleoside diphosphate metabolic process	13/1464	136/18866	0.256754	0.992895	0.981064	ADPGK/DHTKD1/FOXK1/OGT/PKLR/NCOR1/CARD11/SLC4A1/POM121/OGDH/EP300/ENO3/SIRT6	13
BP	GO:0009179	purine ribonucleoside diphosphate metabolic process	13/1464	136/18866	0.256754	0.992895	0.981064	ADPGK/DHTKD1/FOXK1/OGT/PKLR/NCOR1/CARD11/SLC4A1/POM121/OGDH/EP300/ENO3/SIRT6	13
BP	GO:0006417	regulation of translation	39/1464	450/18866	0.257	0.992895	0.981064	DPH7/UQCC1/INPP5E/TSC1/PTCD3/RBM4/ZNF598/NGRN/PATL2/NSUN5/GTPBP2/YTHDF1/POLDIP3/GIGYF2/CAPRIN2/EIF2AK1/CDK5RAP1/RPLP1/DND1/TNRC6A/AGO4/ALKBH1/TRAP1/UPF3A/ATF4/EIF2B4/DPH5/NOLC1/RPL38/ZFP36L2/METTL3/LSM14B/PLEKHN1/RPS3/ROCK2/EIF2AK2/CPEB2/BOLL/DHX9	39
BP	GO:0006906	vesicle fusion	10/1464	101/18866	0.25715	0.992895	0.981064	C2CD5/STX16/ATP13A2/ANKFY1/STX17/TSNARE1/SEC22B/RAB8A/VAMP1/VPS39	10
BP	GO:0002683	negative regulation of immune system process	40/1464	463/18866	0.260323	0.992895	0.981064	C1QC/BCR/THOC1/VSIG4/IFI16/MAD1L1/TRIM27/CLEC4G/SHH/NLRC3/SCRIB/AMBP/SEC14L1/TTLL12/FCGR2B/TCTA/ADIPOQ/PVRIG/PARP3/CACTIN/APOD/IFNL1/ARRB2/IL17D/RHBDD3/DLL1/KLF13/METTL3/AXL/PTPN22/BST2/VTCN1/ADAR/CXCL12/STAT6/CD300A/MYC/PDE5A/MIA3/CXCR2	40
BP	GO:0001676	long-chain fatty acid metabolic process	11/1464	113/18866	0.260607	0.992895	0.981064	CPT1A/GSTM2/GSTM4/GSTM1/MGLL/SLC27A3/CYP2A6/CYP2C9/CYP2C8/ACSBG2/CYP2A7	11
BP	GO:0090090	negative regulation of canonical Wnt signaling pathway	17/1464	184/18866	0.26142	0.992895	0.981064	DVL1/SHH/LZTS2/PRICKLE1/GPC3/JADE1/PTPRO/CCDC88C/NPHP3/DAB2IP/NPHP4/GLI1/TLE2/STK4/STK11/LRP4/SHISA6	17
BP	GO:0061013	regulation of mRNA catabolic process	19/1464	208/18866	0.262007	0.992895	0.981064	PCBP4/YTHDF1/GIGYF2/FASTKD1/EXOSC6/DND1/TNRC6A/GDNF/TIRAP/HNRNPC/FASTK/ZFP36L2/METTL3/FUS/PLEKHN1/EXOSC7/ROCK2/BOLL/DHX9	19
BP	GO:1902905	positive regulation of supramolecular fiber organization	19/1464	208/18866	0.262007	0.992895	0.981064	TSC1/TRIM27/CCR7/PPM1F/RICTOR/SMAD3/ARHGEF15/TESK1/NUMA1/ABL1/OCLN/PICK1/PSRC1/RPS3/BMP10/ROCK2/ACTR3B/MYOC/MYLK3	19
BP	GO:0002548	monocyte chemotaxis	7/1464	67/18866	0.262154	0.992895	0.981064	LGMN/CCL13/PTPRO/DEFB124/CCL16/CCL8/CXCL12	7
BP	GO:0009166	nucleotide catabolic process	7/1464	67/18866	0.262154	0.992895	0.981064	NUDT3/ACAT1/PDE2A/PDE8A/PDE5A/PDE7A/XDH	7
BP	GO:0000002	mitochondrial genome maintenance	3/1464	23/18866	0.262727	0.992895	0.981064	SLC25A36/MSTO1/PIF1	3
BP	GO:0006783	heme biosynthetic process	3/1464	23/18866	0.262727	0.992895	0.981064	PPOX/FXN/ALAS2	3
BP	GO:0006907	pinocytosis	3/1464	23/18866	0.262727	0.992895	0.981064	PROM2/ANKFY1/AXL	3
BP	GO:0010226	response to lithium ion	3/1464	23/18866	0.262727	0.992895	0.981064	SHH/PKLR/FABP4	3
BP	GO:0016048	detection of temperature stimulus	3/1464	23/18866	0.262727	0.992895	0.981064	CXCR4/ARRB2/CXCL12	3
BP	GO:0016226	iron-sulfur cluster assembly	3/1464	23/18866	0.262727	0.992895	0.981064	NFS1/MMS19/FXN	3
BP	GO:0018230	peptidyl-L-cysteine S-palmitoylation	3/1464	23/18866	0.262727	0.992895	0.981064	ZDHHC6/ZDHHC8/ZDHHC7	3
BP	GO:0018231	peptidyl-S-diacylglycerol-L-cysteine biosynthetic process from peptidyl-cysteine	3/1464	23/18866	0.262727	0.992895	0.981064	ZDHHC6/ZDHHC8/ZDHHC7	3
BP	GO:0031163	metallo-sulfur cluster assembly	3/1464	23/18866	0.262727	0.992895	0.981064	NFS1/MMS19/FXN	3
BP	GO:0032799	low-density lipoprotein receptor particle metabolic process	3/1464	23/18866	0.262727	0.992895	0.981064	AP2A2/ADIPOQ/SCAP	3
BP	GO:0035162	embryonic hemopoiesis	3/1464	23/18866	0.262727	0.992895	0.981064	ATF4/STK4/KMT2A	3
BP	GO:0043162	ubiquitin-dependent protein catabolic process via the multivesicular body sorting pathway	3/1464	23/18866	0.262727	0.992895	0.981064	VPS36/MVB12B/PTPN23	3
BP	GO:0048714	positive regulation of oligodendrocyte differentiation	3/1464	23/18866	0.262727	0.992895	0.981064	CXCR4/SHH/TP73	3
BP	GO:0050951	sensory perception of temperature stimulus	3/1464	23/18866	0.262727	0.992895	0.981064	CXCR4/ARRB2/CXCL12	3
BP	GO:0051570	regulation of histone H3-K9 methylation	3/1464	23/18866	0.262727	0.992895	0.981064	JARID2/DNMT3B/ZNF274	3
BP	GO:0060044	negative regulation of cardiac muscle cell proliferation	3/1464	23/18866	0.262727	0.992895	0.981064	RBP4/JARID2/TP73	3
BP	GO:0060445	branching involved in salivary gland morphogenesis	3/1464	23/18866	0.262727	0.992895	0.981064	LAMA5/SHH/HGF	3
BP	GO:0070935	3'-UTR-mediated mRNA stabilization	3/1464	23/18866	0.262727	0.992895	0.981064	TIRAP/HNRNPC/BOLL	3
BP	GO:0071577	zinc ion transmembrane transport	3/1464	23/18866	0.262727	0.992895	0.981064	SLC39A12/SLC39A10/SLC39A2	3
BP	GO:0072010	glomerular epithelium development	3/1464	23/18866	0.262727	0.992895	0.981064	ADIPOQ/PTPRO/KLF15	3
BP	GO:0072677	eosinophil migration	3/1464	23/18866	0.262727	0.992895	0.981064	CCL13/CCL8/CD300A	3
BP	GO:0086012	membrane depolarization during cardiac muscle cell action potential	3/1464	23/18866	0.262727	0.992895	0.981064	KCNJ2/ATP1A2/CACNB2	3
BP	GO:1900017	positive regulation of cytokine production involved in inflammatory response	3/1464	23/18866	0.262727	0.992895	0.981064	IL17D/TICAM1/IL17A	3
BP	GO:1901032	negative regulation of response to reactive oxygen species	3/1464	23/18866	0.262727	0.992895	0.981064	HGF/TRAP1/PDE8A	3
BP	GO:1903206	negative regulation of hydrogen peroxide-induced cell death	3/1464	23/18866	0.262727	0.992895	0.981064	HGF/TRAP1/PDE8A	3
BP	GO:0070542	response to fatty acid	9/1464	90/18866	0.262957	0.992895	0.981064	PDK4/CPT1A/CCR7/GIPR/ADIPOQ/AKAP8/SMARCD1/P2RY4/PTGER2	9
BP	GO:0035270	endocrine system development	12/1464	125/18866	0.263211	0.992895	0.981064	HOXA3/SHH/GIPR/SMAD3/ARID5B/ALDH1A2/PITX1/GLI1/DLL1/SIX3/RAF1/NR5A1	12
BP	GO:1903038	negative regulation of leukocyte cell-cell adhesion	13/1464	137/18866	0.265156	0.992895	0.981064	VSIG4/MAD1L1/CLEC4G/SHH/SCRIB/FCGR2B/IFNL1/PTPN22/VTCN1/CXCL12/CD300A/PDE5A/MIA3	13
BP	GO:0019320	hexose catabolic process	6/1464	56/18866	0.26614	0.992895	0.981064	GALT/ADPGK/FOXK1/PKLR/LRP5/ENO3	6
BP	GO:0035825	homologous recombination	6/1464	56/18866	0.26614	0.992895	0.981064	C11orf80/UBR2/REC8/RAD51D/EME2/CORT	6
BP	GO:0044273	sulfur compound catabolic process	6/1464	56/18866	0.26614	0.992895	0.981064	CSAD/ACAT1/IDUA/MPST/BCAN/NCAN	6
BP	GO:0060688	regulation of morphogenesis of a branching structure	6/1464	56/18866	0.26614	0.992895	0.981064	SHH/HGF/ABL1/PGF/GDNF/SIRT6	6
BP	GO:1903307	positive regulation of regulated secretory pathway	6/1464	56/18866	0.26614	0.992895	0.981064	KCNB1/SCAMP5/RAB3D/NPPA/CACNA1H/CACNB2	6
BP	GO:0014074	response to purine-containing compound	14/1464	149/18866	0.266582	0.992895	0.981064	DGKQ/GSTM2/WNT10B/PKLR/P2RY1/PPARGC1B/ADIPOQ/DNMT3B/PDE2A/P2RX1/SLC5A5/DUOX2/P2RY4/DHODH	14
BP	GO:1901293	nucleoside phosphate biosynthetic process	24/1464	269/18866	0.266759	0.992895	0.981064	UCKL1/PDK4/GUCA1C/DCTD/ACSS1/PKLR/ACAT1/NOS1/PDPR/DCAKD/PANK4/ACACB/PARP10/ACMSD/NPPA/FASN/ACSBG2/ADCY4/PDK2/ATP6/PRPS1L1/DHODH/NADK/TECR	24
BP	GO:0000079	regulation of cyclin-dependent protein serine/threonine kinase activity	10/1464	102/18866	0.266961	0.992895	0.981064	CCNL2/CDK5RAP3/CCNL1/CDK5RAP1/CDKN1C/CNPPD1/PSRC1/SPDYA/CDC37/CCNE1	10
BP	GO:0001767	establishment of lymphocyte polarity	2/1464	13/18866	0.267404	0.992895	0.981064	CCR7/SCRIB	2
BP	GO:0001973	G protein-coupled adenosine receptor signaling pathway	2/1464	13/18866	0.267404	0.992895	0.981064	ADORA3/P2RY1	2
BP	GO:0002921	negative regulation of humoral immune response	2/1464	13/18866	0.267404	0.992895	0.981064	VSIG4/FCGR2B	2
BP	GO:0006012	galactose metabolic process	2/1464	13/18866	0.267404	0.992895	0.981064	GALK2/GALT	2
BP	GO:0006264	mitochondrial DNA replication	2/1464	13/18866	0.267404	0.992895	0.981064	DNAJA3/POLG	2
BP	GO:0006553	lysine metabolic process	2/1464	13/18866	0.267404	0.992895	0.981064	OGDH/PHYKPL	2
BP	GO:0007171	activation of transmembrane receptor protein tyrosine kinase activity	2/1464	13/18866	0.267404	0.992895	0.981064	DGKQ/ANGPT1	2
BP	GO:0007494	midgut development	2/1464	13/18866	0.267404	0.992895	0.981064	ALDH1A2/RET	2
BP	GO:0009650	UV protection	2/1464	13/18866	0.267404	0.992895	0.981064	ERCC3/SDF4	2
BP	GO:0010635	regulation of mitochondrial fusion	2/1464	13/18866	0.267404	0.992895	0.981064	ZDHHC6/ADCK1	2
BP	GO:0010642	negative regulation of platelet-derived growth factor receptor signaling pathway	2/1464	13/18866	0.267404	0.992895	0.981064	ADIPOQ/APOD	2
BP	GO:0010958	regulation of amino acid import across plasma membrane	2/1464	13/18866	0.267404	0.992895	0.981064	SLC43A1/ATP1A2	2
BP	GO:0015697	quaternary ammonium group transport	2/1464	13/18866	0.267404	0.992895	0.981064	SLC25A20/SLC25A45	2
BP	GO:0015816	glycine transport	2/1464	13/18866	0.267404	0.992895	0.981064	SLC7A8/SLC38A5	2
BP	GO:0016322	neuron remodeling	2/1464	13/18866	0.267404	0.992895	0.981064	EPHA8/C1QA	2
BP	GO:0018095	protein polyglutamylation	2/1464	13/18866	0.267404	0.992895	0.981064	TPGS1/TTLL9	2
BP	GO:0021978	telencephalon regionalization	2/1464	13/18866	0.267404	0.992895	0.981064	SHH/SIX3	2
BP	GO:0031665	negative regulation of lipopolysaccharide-mediated signaling pathway	2/1464	13/18866	0.267404	0.992895	0.981064	LILRA2/CACTIN	2
BP	GO:0031953	negative regulation of protein autophosphorylation	2/1464	13/18866	0.267404	0.992895	0.981064	ADIPOQ/TESK1	2
BP	GO:0032096	negative regulation of response to food	2/1464	13/18866	0.267404	0.992895	0.981064	BBS2/NPFF	2
BP	GO:0032099	negative regulation of appetite	2/1464	13/18866	0.267404	0.992895	0.981064	BBS2/NPFF	2
BP	GO:0032493	response to bacterial lipoprotein	2/1464	13/18866	0.267404	0.992895	0.981064	TIRAP/SSC5D	2
BP	GO:0032968	positive regulation of transcription elongation from RNA polymerase II promoter	2/1464	13/18866	0.267404	0.992895	0.981064	CDK13/SUPT16H	2
BP	GO:0034144	negative regulation of toll-like receptor 4 signaling pathway	2/1464	13/18866	0.267404	0.992895	0.981064	LILRA2/DAB2IP	2
BP	GO:0034244	negative regulation of transcription elongation from RNA polymerase II promoter	2/1464	13/18866	0.267404	0.992895	0.981064	SHH/NELFCD	2
BP	GO:0034309	primary alcohol biosynthetic process	2/1464	13/18866	0.267404	0.992895	0.981064	DGKQ/CACNA1H	2
BP	GO:0035563	positive regulation of chromatin binding	2/1464	13/18866	0.267404	0.992895	0.981064	HMBOX1/DDX11	2
BP	GO:0035588	G protein-coupled purinergic receptor signaling pathway	2/1464	13/18866	0.267404	0.992895	0.981064	ADORA3/P2RY1	2
BP	GO:0042308	negative regulation of protein import into nucleus	2/1464	13/18866	0.267404	0.992895	0.981064	APOD/ANGPT1	2
BP	GO:0042538	hyperosmotic salinity response	2/1464	13/18866	0.267404	0.992895	0.981064	SLC25A23/EFHD1	2
BP	GO:0043201	response to leucine	2/1464	13/18866	0.267404	0.992895	0.981064	UBR2/SESN1	2
BP	GO:0051481	negative regulation of cytosolic calcium ion concentration	2/1464	13/18866	0.267404	0.992895	0.981064	SMAD3/ATP1A2	2
BP	GO:0051956	negative regulation of amino acid transport	2/1464	13/18866	0.267404	0.992895	0.981064	SLC43A1/HRH3	2
BP	GO:0060312	regulation of blood vessel remodeling	2/1464	13/18866	0.267404	0.992895	0.981064	BCR/HRG	2
BP	GO:0061430	bone trabecula morphogenesis	2/1464	13/18866	0.267404	0.992895	0.981064	WNT10B/PPARGC1B	2
BP	GO:0070914	UV-damage excision repair	2/1464	13/18866	0.267404	0.992895	0.981064	ACTR5/INO80	2
BP	GO:0071415	cellular response to purine-containing compound	2/1464	13/18866	0.267404	0.992895	0.981064	GSTM2/P2RY1	2
BP	GO:0072710	response to hydroxyurea	2/1464	13/18866	0.267404	0.992895	0.981064	DDX11/SPIDR	2
BP	GO:0090042	tubulin deacetylation	2/1464	13/18866	0.267404	0.992895	0.981064	NEK3/EP300	2
BP	GO:0090179	planar cell polarity pathway involved in neural tube closure	2/1464	13/18866	0.267404	0.992895	0.981064	DVL1/NPHP3	2
BP	GO:0099638	endosome to plasma membrane protein transport	2/1464	13/18866	0.267404	0.992895	0.981064	SCRIB/RAB8A	2
BP	GO:1900272	negative regulation of long-term synaptic potentiation	2/1464	13/18866	0.267404	0.992895	0.981064	PPP1R9A/ABL1	2
BP	GO:1903236	regulation of leukocyte tethering or rolling	2/1464	13/18866	0.267404	0.992895	0.981064	ITGA4/CXCL12	2
BP	GO:1903789	regulation of amino acid transmembrane transport	2/1464	13/18866	0.267404	0.992895	0.981064	SLC43A1/ATP1A2	2
BP	GO:1904590	negative regulation of protein import	2/1464	13/18866	0.267404	0.992895	0.981064	APOD/ANGPT1	2
BP	GO:1905244	regulation of modification of synaptic structure	2/1464	13/18866	0.267404	0.992895	0.981064	ITSN1/ABL1	2
BP	GO:1990403	embryonic brain development	2/1464	13/18866	0.267404	0.992895	0.981064	IFT140/RNF112	2
BP	GO:2000052	positive regulation of non-canonical Wnt signaling pathway	2/1464	13/18866	0.267404	0.992895	0.981064	GPC3/ABL1	2
BP	GO:2000194	regulation of female gonad development	2/1464	13/18866	0.267404	0.992895	0.981064	RETN/NR5A1	2
BP	GO:0042593	glucose homeostasis	22/1464	245/18866	0.267901	0.992895	0.981064	OAS1/PDK4/SLC9B2/RBP4/KCNB1/FOXK1/ZNF236/LRP5L/LRP5/POLG/ADIPOQ/KLF15/TH/PLA2G6/STXBP5L/STK11/PRKACA/PDK2/CRY2/NADK/RAF1/SIRT6	22
BP	GO:0071375	cellular response to peptide hormone stimulus	29/1464	330/18866	0.268179	0.992895	0.981064	PDK4/TSC1/C2CD5/SRSF5/ARID1B/PRKCB/OGT/PKLR/NDEL1/SERPINA12/RAB12/ADIPOQ/HSF1/CAPN10/GH2/SH2B2/MZB1/SORBS1/ATP6V0A1/PRKAR1B/ZDHHC7/PRKACA/RAB8A/HDAC5/ADCY4/PDK2/ROCK2/STAT6/CPEB2	29
BP	GO:0006633	fatty acid biosynthetic process	16/1464	173/18866	0.26827	0.992895	0.981064	PDK4/GSTM2/PRKAB2/ACADVL/ACSS1/GSTM4/ADIPOQ/GSTM1/ACACB/MGLL/CYP2C9/CYP2C8/SCAP/FASN/ACSBG2/TECR	16
BP	GO:0006446	regulation of translational initiation	8/1464	79/18866	0.268757	0.992895	0.981064	RBM4/YTHDF1/EIF2AK1/ALKBH1/ATF4/METTL3/EIF2AK2/BOLL	8
BP	GO:0016575	histone deacetylation	8/1464	79/18866	0.268757	0.992895	0.981064	CTBP1/SIN3B/AKAP8L/AKAP8/HDAC5/MTA1/BAZ2A/SIRT6	8
BP	GO:0032272	negative regulation of protein polymerization	8/1464	79/18866	0.268757	0.992895	0.981064	SSH3/SSH2/AVIL/TRIOBP/FKBP4/FLII/SPTBN1/ADD1	8
BP	GO:0006164	purine nucleotide biosynthetic process	18/1464	197/18866	0.268842	0.992895	0.981064	PDK4/GUCA1C/ACSS1/PKLR/ACAT1/NOS1/PDPR/DCAKD/PANK4/ACACB/NPPA/FASN/ACSBG2/ADCY4/PDK2/ATP6/PRPS1L1/TECR	18
BP	GO:0045429	positive regulation of nitric oxide biosynthetic process	5/1464	45/18866	0.268844	0.992895	0.981064	KLF2/HBB/SMAD3/MMP8/TICAM1	5
BP	GO:0051293	establishment of spindle localization	5/1464	45/18866	0.268844	0.992895	0.981064	LLGL2/NDEL1/INSC/SAPCD2/NUMA1	5
BP	GO:0055026	negative regulation of cardiac muscle tissue development	5/1464	45/18866	0.268844	0.992895	0.981064	SOX6/RBP4/JARID2/TP73/DLL1	5
BP	GO:0060443	mammary gland morphogenesis	5/1464	45/18866	0.268844	0.992895	0.981064	LRP5L/SCRIB/LRP5/PML/STAT6	5
BP	GO:0090311	regulation of protein deacetylation	5/1464	45/18866	0.268844	0.992895	0.981064	CTBP1/NEK3/AKAP8L/EP300/AKAP8	5
BP	GO:0010765	positive regulation of sodium ion transport	4/1464	34/18866	0.26889	0.992895	0.981064	WNK2/NOS1/ATP1B2/GPD1L	4
BP	GO:0010922	positive regulation of phosphatase activity	4/1464	34/18866	0.26889	0.992895	0.981064	SMAD3/SLC39A10/PPARGC1B/CD300A	4
BP	GO:0016242	negative regulation of macroautophagy	4/1464	34/18866	0.26889	0.992895	0.981064	TSC1/POLDIP2/SEC22B/USP36	4
BP	GO:0030851	granulocyte differentiation	4/1464	34/18866	0.26889	0.992895	0.981064	C1QC/ADIPOQ/L3MBTL3/FASN	4
BP	GO:0031112	positive regulation of microtubule polymerization or depolymerization	4/1464	34/18866	0.26889	0.992895	0.981064	NUMA1/OCLN/PSRC1/RPS3	4
BP	GO:0042311	vasodilation	4/1464	34/18866	0.26889	0.992895	0.981064	NOS1/BBS2/NPPA/KNG1	4
BP	GO:0048536	spleen development	4/1464	34/18866	0.26889	0.992895	0.981064	SLC40A1/JARID2/CTC1/ABL1	4
BP	GO:0070050	neuron cellular homeostasis	4/1464	34/18866	0.26889	0.992895	0.981064	P2RY1/P2RX1/P2RY4/CACNB2	4
BP	GO:2000036	regulation of stem cell population maintenance	4/1464	34/18866	0.26889	0.992895	0.981064	KAT2A/TAF6L/PRDM14/MYC	4
BP	GO:2000352	negative regulation of endothelial cell apoptotic process	4/1464	34/18866	0.26889	0.992895	0.981064	TERT/FGB/ABL1/ANGPT1	4
BP	GO:0030004	cellular monovalent inorganic cation homeostasis	11/1464	114/18866	0.269919	0.99603	0.984162	UBE3A/TM9SF4/NOX1/KCNJ2/SLC4A1/ATP6V0A1/ATP1A2/CA7/SLC9A8/ATP1B2/C7	11
BP	GO:0006650	glycerophospholipid metabolic process	30/1464	343/18866	0.272488	0.998735	0.986834	INPP5E/CHKA/GPCPD1/PIGG/DGKA/IP6K2/DGKQ/PIGL/CPNE1/MTMR11/OSBPL10/CHKB/PIGS/PIK3R6/CSNK2B/IP6K1/PGP/PIK3R5/LPCAT4/PLA2G6/PCYT2/ETNK2/PCYT1A/DGKD/PIGB/DGKE/PLA2G15/ACP6/SBF1/GPD1L	30
BP	GO:0045921	positive regulation of exocytosis	9/1464	91/18866	0.273482	0.998735	0.986834	KCNB1/FGB/ATP13A2/SCAMP5/RAB3D/PLA2G6/NPPA/CACNA1H/CACNB2	9
BP	GO:0055076	transition metal ion homeostasis	13/1464	138/18866	0.27365	0.998735	0.986834	SLC40A1/SLC39A12/COX19/EIF2AK1/ATP13A2/SLC39A10/SLC46A1/ATP7B/SLC25A37/FXN/ALAS2/MYC/AP3D1	13
BP	GO:0006469	negative regulation of protein kinase activity	22/1464	246/18866	0.274237	0.998735	0.986834	DVL1/TRIM27/CDK5RAP3/PPM1F/STK38/MLLT1/LRP5/CDK5RAP1/CDKN1C/ADIPOQ/PTPRO/TRIB2/TESK1/FABP4/ABL1/DAB2IP/TAB1/PRKAR1B/NPPA/PTPN22/ADAR/CD300A	22
BP	GO:0033500	carbohydrate homeostasis	22/1464	246/18866	0.274237	0.998735	0.986834	OAS1/PDK4/SLC9B2/RBP4/KCNB1/FOXK1/ZNF236/LRP5L/LRP5/POLG/ADIPOQ/KLF15/TH/PLA2G6/STXBP5L/STK11/PRKACA/PDK2/CRY2/NADK/RAF1/SIRT6	22
BP	GO:0002637	regulation of immunoglobulin production	7/1464	68/18866	0.274422	0.998735	0.986834	THOC1/RBP4/FCGR2B/EXOSC6/PARP3/MZB1/STAT6	7
BP	GO:0002753	cytoplasmic pattern recognition receptor signaling pathway	7/1464	68/18866	0.274422	0.998735	0.986834	RNF135/ZCCHC3/SEC14L1/TAB1/IRF7/NOD1/PTPN22	7
BP	GO:0072665	protein localization to vacuole	7/1464	68/18866	0.274422	0.998735	0.986834	VPS36/VPS13C/SZT2/ATP13A2/NUMA1/ROCK2/AP3D1	7
BP	GO:1902369	negative regulation of RNA catabolic process	7/1464	68/18866	0.274422	0.998735	0.986834	DND1/GDNF/TIRAP/HNRNPC/FUS/BOLL/DHX9	7
BP	GO:0007034	vacuolar transport	14/1464	150/18866	0.274737	0.998735	0.986834	TRAK1/VPS52/VPS36/VPS13C/ATP13A2/ANKFY1/RAB12/NUMA1/HOOK2/ATG14/MGRN1/FAM160A2/VPS39/AP3D1	14
BP	GO:0016053	organic acid biosynthetic process	32/1464	368/18866	0.275327	0.998735	0.986834	RIMKLB/ABCC5/OSBPL2/PDK4/CSAD/GSTM2/PRKAB2/ACADVL/ACSS1/PKLR/CARNS1/HOGA1/GSTM4/ADIPOQ/GSTM1/ACACB/ILVBL/MGLL/OSBPL7/CHST12/ALDH1A2/BCAT2/CYP2C9/CYP2C8/ACMSD/BCAN/SCAP/FASN/ACSBG2/CYP8B1/NCAN/TECR	32
BP	GO:0030098	lymphocyte differentiation	32/1464	368/18866	0.275327	0.998735	0.986834	TSC1/KAT2A/DNAJA3/SOX12/CCR7/SHH/GON4L/ITGA4/FCGR2B/ITFG2/CARD11/PIK3R6/POLM/ABL1/DCLRE1C/SLAMF6/IFNL1/MFNG/RSAD2/TNFSF8/DLL1/EP300/ZFP36L2/METTL3/STK11/IFNA4/AXL/HDAC5/PTPN22/STAT6/KLF6/AP3D1	32
BP	GO:0001659	temperature homeostasis	16/1464	174/18866	0.275843	0.998735	0.986834	CXCR4/WNT10B/PRKAB2/ACADVL/OGT/PPARGC1B/NOVA2/ADIPOQ/HSF1/FABP4/IP6K1/ATF4/STK11/STAT6/CIDEA/SIRT6	16
BP	GO:0009260	ribonucleotide biosynthetic process	17/1464	186/18866	0.275993	0.998735	0.986834	UCKL1/PDK4/ACSS1/PKLR/ACAT1/PDPR/DCAKD/PANK4/ACACB/NPPA/FASN/ACSBG2/ADCY4/PDK2/ATP6/DHODH/TECR	17
BP	GO:0050770	regulation of axonogenesis	17/1464	186/18866	0.275993	0.998735	0.986834	GOLGA4/TRAK1/YTHDF1/SEMA3G/NDEL1/ZFYVE27/PTPRO/ZSWIM8/MEGF8/ABL1/STK25/RET/SEMA3B/STK11/LRP4/CXCL12/LPAR3	17
BP	GO:0051147	regulation of muscle cell differentiation	17/1464	186/18866	0.275993	0.998735	0.986834	SOX6/KAT2A/RBM4/SHH/MAPK12/NFATC3/ABL1/FLOT1/ARRB2/DLL1/NLN/HDAC5/BMP10/CDK9/DMPK/MAML1/MYLK3	17
BP	GO:0003012	muscle system process	40/1464	467/18866	0.278654	0.998735	0.986834	CCDC78/CXCR4/RCSD1/JARID2/CHRNE/GSTM2/CAMK2G/LTB4R/SMAD3/PABPN1/NOS1/HSPB6/P2RY1/KCNJ2/TNNI3/NMUR2/BBS2/GDNF/SORBS1/P2RX1/KLF15/CD38/ATP1A2/PLA2G6/KCNIP2/NPPA/TLN1/SMTN/PRKACA/CACNA1H/BMP10/CDK9/KCNA1/DMPK/ROCK2/CACNB2/PDE5A/PPP1R12B/GPD1L/MYOC	40
BP	GO:0006023	aminoglycan biosynthetic process	11/1464	115/18866	0.279335	0.998735	0.986834	ABCC5/B4GALT3/NDST3/ST3GAL3/GPC3/B3GALT6/B4GALT2/CHST12/BCAN/ANGPT1/NCAN	11
BP	GO:0019748	secondary metabolic process	6/1464	57/18866	0.27971	0.998735	0.986834	DCT/AS3MT/TH/CYP2A6/ACMSD/CYP2A7	6
BP	GO:0045292	mRNA cis splicing, via spliceosome	6/1464	57/18866	0.27971	0.998735	0.986834	SRSF6/RBM4/SRSF5/SRSF8/CACTIN/PRPF39	6
BP	GO:0071398	cellular response to fatty acid	6/1464	57/18866	0.27971	0.998735	0.986834	PDK4/CPT1A/AKAP8/SMARCD1/P2RY4/PTGER2	6
BP	GO:0031397	negative regulation of protein ubiquitination	8/1464	80/18866	0.280132	0.998735	0.986834	OGT/ABL1/U2AF2/ARRB2/ISG15/PARP10/RPS3/UBR5	8
BP	GO:0048678	response to axon injury	8/1464	80/18866	0.280132	0.998735	0.986834	CERS2/GIPR/NDEL1/APOD/FOLR1/LRIG2/GAP43/STK24	8
BP	GO:0014066	regulation of phosphatidylinositol 3-kinase signaling	12/1464	127/18866	0.28106	0.998735	0.986834	INPP5E/UBE3A/NLRC3/HGF/SERPINA12/DAB2IP/PRR5/PIK3R5/RGL2/EPOR/ANGPT1/MYOC	12
BP	GO:0009185	ribonucleoside diphosphate metabolic process	13/1464	139/18866	0.282233	0.998735	0.986834	ADPGK/DHTKD1/FOXK1/OGT/PKLR/NCOR1/CARD11/SLC4A1/POM121/OGDH/EP300/ENO3/SIRT6	13
BP	GO:0006261	DNA-dependent DNA replication	14/1464	151/18866	0.282973	0.998735	0.986834	THOC1/DNAJA3/INO80/WRNIP1/EME2/RPA4/POLG/CHTF18/DDX11/TICRR/RECQL4/CCNE1/CDK9/CORT	14
BP	GO:0035567	non-canonical Wnt signaling pathway	14/1464	151/18866	0.282973	0.998735	0.986834	DVL1/FZD3/AP2A2/DAAM2/PRICKLE1/GPC3/CCDC88C/TNRC6A/AGO4/NPHP3/ABL1/ARRB2/PLCB2/MYOC	14
BP	GO:0010256	endomembrane system organization	40/1464	468/18866	0.283316	0.998735	0.986834	SUN1/OSBPL2/CXCR4/SEC16B/XKR8/VPS36/GOLGA2P5/NEK9/STX16/LMAN1L/NOX1/PRKCB/GORASP1/SEC31B/BAG6/NDEL1/XKR6/ATP8B1/ZFYVE27/STX17/GET4/NUMA1/HOOK2/COG3/SLC4A1/FLOT1/TMEM43/SEC16A/AKAP8L/STK25/FAM160A2/CUL7/TMEM170A/TJAP1/DMPK/TRAM2/MIA3/SPTBN1/AP3D1/RNF112	40
BP	GO:0051494	negative regulation of cytoskeleton organization	15/1464	163/18866	0.28337	0.998735	0.986834	KAT2A/SSH3/ARHGEF18/PPP1R9A/SSH2/AVIL/PICK1/TRIOBP/PLEKHH2/FKBP4/TTBK2/FLII/SPTBN1/MYOC/ADD1	15
BP	GO:1903321	negative regulation of protein modification by small protein conjugation or removal	9/1464	92/18866	0.284128	0.998735	0.986834	OGT/ABL1/U2AF2/ARRB2/ISG15/PARP10/RPS3/UBR5/CAPN3	9
BP	GO:0001754	eye photoreceptor cell differentiation	5/1464	46/18866	0.28414	0.998735	0.986834	TUG1/TH/RPGRIP1/RDH13/CABP4	5
BP	GO:0010874	regulation of cholesterol efflux	5/1464	46/18866	0.28414	0.998735	0.986834	YJEFN3/SHH/PLTP/ADIPOQ/ZDHHC8	5
BP	GO:0014014	negative regulation of gliogenesis	5/1464	46/18866	0.28414	0.998735	0.986834	TERT/DAAM2/CERS2/MBD1/ATP1B2	5
BP	GO:0017144	drug metabolic process	5/1464	46/18866	0.28414	0.998735	0.986834	NOS1/CYP2A6/CYP2C9/CYP2C8/CYP2A7	5
BP	GO:0032570	response to progesterone	5/1464	46/18866	0.28414	0.998735	0.986834	UBE3A/TXNIP/CD38/CATSPER3/PTGER2	5
BP	GO:0050982	detection of mechanical stimulus	5/1464	46/18866	0.28414	0.998735	0.986834	CXCR4/CHRNA10/PIEZO1/KCNA1/CXCL12	5
BP	GO:1904407	positive regulation of nitric oxide metabolic process	5/1464	46/18866	0.28414	0.998735	0.986834	KLF2/HBB/SMAD3/MMP8/TICAM1	5
BP	GO:0002407	dendritic cell chemotaxis	3/1464	24/18866	0.284416	0.998735	0.986834	CXCR4/CCR7/CXCR2	3
BP	GO:0010881	regulation of cardiac muscle contraction by regulation of the release of sequestered calcium ion	3/1464	24/18866	0.284416	0.998735	0.986834	GSTM2/ATP1A2/PRKACA	3
BP	GO:0021511	spinal cord patterning	3/1464	24/18866	0.284416	0.998735	0.986834	SHH/TULP3/GDF11	3
BP	GO:0021801	cerebral cortex radial glia guided migration	3/1464	24/18866	0.284416	0.998735	0.986834	SUN1/SYNE2/DAB2IP	3
BP	GO:0022030	telencephalon glial cell migration	3/1464	24/18866	0.284416	0.998735	0.986834	SUN1/SYNE2/DAB2IP	3
BP	GO:0030325	adrenal gland development	3/1464	24/18866	0.284416	0.998735	0.986834	SMAD3/ARID5B/NR5A1	3
BP	GO:0034035	purine ribonucleoside bisphosphate metabolic process	3/1464	24/18866	0.284416	0.998735	0.986834	SULT1A2/SULT1A1/SULT1C4	3
BP	GO:0036003	positive regulation of transcription from RNA polymerase II promoter in response to stress	3/1464	24/18866	0.284416	0.998735	0.986834	KLF2/HSF1/ATF4	3
BP	GO:0050427	3'-phosphoadenosine 5'-phosphosulfate metabolic process	3/1464	24/18866	0.284416	0.998735	0.986834	SULT1A2/SULT1A1/SULT1C4	3
BP	GO:0050995	negative regulation of lipid catabolic process	3/1464	24/18866	0.284416	0.998735	0.986834	ACACB/PLIN5/CIDEA	3
BP	GO:0051349	positive regulation of lyase activity	3/1464	24/18866	0.284416	0.998735	0.986834	GUCA1C/NOS1/FXN	3
BP	GO:0060444	branching involved in mammary gland duct morphogenesis	3/1464	24/18866	0.284416	0.998735	0.986834	LRP5L/LRP5/PML	3
BP	GO:0071294	cellular response to zinc ion	3/1464	24/18866	0.284416	0.998735	0.986834	HVCN1/ATP13A2/MTF1	3
BP	GO:0086064	cell communication by electrical coupling involved in cardiac conduction	3/1464	24/18866	0.284416	0.998735	0.986834	ATP1A2/PRKACA/ATP1B2	3
BP	GO:1903306	negative regulation of regulated secretory pathway	3/1464	24/18866	0.284416	0.998735	0.986834	BCR/FCGR2B/CD300A	3
BP	GO:0045862	positive regulation of proteolysis	32/1464	370/18866	0.285811	0.998735	0.986834	HIP1/DVL1/IFI16/MAPK12/PPM1F/LGMN/OGT/SMAD3/GRAMD4/PRICKLE1/BAG6/F12/TRIB2/HSF1/OSBPL7/NLRP1/DAB2IP/P2RX1/MEFV/CASP10/CIDEB/PML/NOD1/MTCH1/RPS3/ROCK2/MYC/PIDD1/UACA/CAPN3/SIRT6/XDH	32
BP	GO:0006739	NADP metabolic process	4/1464	35/18866	0.286642	0.998735	0.986834	NOX1/ME2/KCNAB2/NADK	4
BP	GO:0033687	osteoblast proliferation	4/1464	35/18866	0.286642	0.998735	0.986834	SMAD3/LRP5/ABL1/EIF2AK2	4
BP	GO:0039694	viral RNA genome replication	4/1464	35/18866	0.286642	0.998735	0.986834	ATG16L2/SETDB1/ATG16L1/ROCK2	4
BP	GO:0040001	establishment of mitotic spindle localization	4/1464	35/18866	0.286642	0.998735	0.986834	NDEL1/INSC/SAPCD2/NUMA1	4
BP	GO:0045922	negative regulation of fatty acid metabolic process	4/1464	35/18866	0.286642	0.998735	0.986834	ACADVL/NCOR1/ACACB/PLIN5	4
BP	GO:0070670	response to interleukin-4	4/1464	35/18866	0.286642	0.998735	0.986834	MRC1/PML/FASN/STAT6	4
BP	GO:1901223	negative regulation of NIK/NF-kappaB signaling	4/1464	35/18866	0.286642	0.998735	0.986834	CPNE1/NLRC3/C1QTNF3/UACA	4
BP	GO:2000573	positive regulation of DNA biosynthetic process	7/1464	69/18866	0.286833	0.998735	0.986834	HNRNPA1/HMBOX1/MAP3K4/HGF/CHTF18/ARRB2/MYC	7
BP	GO:0000726	non-recombinational repair	10/1464	104/18866	0.286924	0.998735	0.986834	RAD52/HSF1/PARP3/POLM/DCLRE1C/UIMC1/MDC1/KAT5/ERCC8/HERC2	10
BP	GO:0032231	regulation of actin filament bundle assembly	10/1464	104/18866	0.286924	0.998735	0.986834	TSC1/PPM1F/ARHGEF18/SMAD3/PPP1R9A/ARHGEF15/TESK1/ABL1/ROCK2/MYOC	10
BP	GO:0043279	response to alkaloid	10/1464	104/18866	0.286924	0.998735	0.986834	CXCR4/UBE3A/GSTM2/MBD1/DNMT3B/SPIDR/TH/HDAC5/DHODH/NPFF	10
BP	GO:0046916	cellular transition metal ion homeostasis	11/1464	116/18866	0.288849	0.998735	0.986834	SLC40A1/SLC39A12/COX19/ATP13A2/SLC39A10/SLC46A1/ATP7B/FXN/ALAS2/MYC/AP3D1	11
BP	GO:1903828	negative regulation of cellular protein localization	11/1464	116/18866	0.288849	0.998735	0.986834	INPP5E/LZTS2/ADIPOQ/SAPCD2/MRAP/APOD/NUMB/POLR1A/TTBK2/ANGPT1/ROCK2	11
BP	GO:0009755	hormone-mediated signaling pathway	18/1464	200/18866	0.290313	0.998735	0.986834	UBE3A/DDX17/NCOR1/PPARGC1B/RXRB/CSNK2B/ARRB2/CALCOCO1/NR2C1/SAFB2/KMT2D/EP300/DAXX/TSHB/FKBP4/UBR5/CRY2/NR5A1	18
BP	GO:0048284	organelle fusion	13/1464	140/18866	0.290899	0.998735	0.986834	C2CD5/ZDHHC6/STX16/ADCK1/ATP13A2/ANKFY1/STX17/TSNARE1/SEC22B/RAB8A/ENO3/VAMP1/VPS39	13
BP	GO:0016241	regulation of macroautophagy	16/1464	176/18866	0.291204	0.998735	0.986834	TBC1D14/TSC1/CALCOCO2/VPS13C/PRKAB2/ATP13A2/RAB12/ATP6V0A1/SESN1/RALB/POLDIP2/NOD1/SEC22B/PRKACA/CDC37/USP36	16
BP	GO:0010833	telomere maintenance via telomere lengthening	8/1464	81/18866	0.291631	0.998735	0.986834	TERT/TELO2/CTC1/HNRNPA1/HMBOX1/MAP3K4/HNRNPC/PIF1	8
BP	GO:0001666	response to hypoxia	31/1464	359/18866	0.292688	0.998735	0.986834	TERT/CXCR4/HIF3A/TM9SF4/PKLR/SMAD3/NOS1/ADIPOQ/HSF1/MPL/DNMT3B/PDLIM1/PGF/ND4/CD38/USP19/TH/NPPA/ERCC3/PML/MDM4/SCAP/EP300/PLEKHN1/ALAS2/ROCK2/CXCL12/HIF1AN/MYC/CPEB2/RAF1	31
BP	GO:0045787	positive regulation of cell cycle	34/1464	396/18866	0.293104	0.998735	0.986834	TERT/THOC1/UHRF2/SH2B1/CDC16/PCBP4/TP73/WNT10B/INO80/LGMN/CDK10/LRP5/HSF1/NUMA1/DDX11/ABL1/DAB2IP/USP19/POLDIP2/PSRC1/GLI1/PML/CDC25B/MDM4/SPDYA/EP300/PRKACA/CDK9/ROCK2/PPP1R10/PIDD1/HCFC1/MYBBP1A/RNF112	34
BP	GO:0018105	peptidyl-serine phosphorylation	27/1464	310/18866	0.293147	0.998735	0.986834	SH2D3A/DGKQ/MST1/MAPK12/MAPK13/PPM1F/CLK1/STK38/RICTOR/PRKCB/CAPRIN2/HGF/NOS1/IKBKB/CSNK1G2/SGK2/ARRB2/RET/STK4/IFNA4/PRKACA/TTBK2/ANGPT1/DMPK/ROCK2/RAF1/GPD1L	27
BP	GO:0030042	actin filament depolymerization	6/1464	58/18866	0.293431	0.998735	0.986834	AVIL/TRIOBP/PLEKHH2/FLII/SPTBN1/ADD1	6
BP	GO:0031638	zymogen activation	6/1464	58/18866	0.293431	0.998735	0.986834	IFI16/LGMN/FGB/F12/CD5L/CIDEB	6
BP	GO:0035306	positive regulation of dephosphorylation	6/1464	58/18866	0.293431	0.998735	0.986834	SYMPK/SMAD3/SLC39A10/PPARGC1B/PPP2R5D/CD300A	6
BP	GO:0043551	regulation of phosphatidylinositol 3-kinase activity	6/1464	58/18866	0.293431	0.998735	0.986834	EPHA8/CCR7/PIK3R6/DAB2IP/PIK3R5/ATG14	6
BP	GO:1903749	positive regulation of establishment of protein localization to mitochondrion	6/1464	58/18866	0.293431	0.998735	0.986834	HPS4/TP73/PPP3CC/UBL4B/ABLIM3/USP36	6
BP	GO:0006497	protein lipidation	9/1464	93/18866	0.294883	0.998735	0.986834	PIGG/ZDHHC6/PIGL/ZDHHC17/PIGS/ZDHHC8/ZDHHC7/PIGB/PORCN	9
BP	GO:0045132	meiotic chromosome segregation	9/1464	93/18866	0.294883	0.998735	0.986834	SUN1/REC8/EME2/BAG6/AGO4/SYCP2/CCNE1/HORMAD2/CORT	9
BP	GO:0140014	mitotic nuclear division	25/1464	286/18866	0.296004	0.998735	0.986834	MAU2/WRAP73/SH2B1/L3MBTL1/CDC16/CEP192/KIFC2/MAD1L1/CDK13/MSTO1/NEK9/KNTC1/RRS1/REC8/INO80/PRKCB/POGZ/LRP5/NDEL1/NUMA1/AKAP8L/PSRC1/CUL7/AKAP8/KNSTRN	25
BP	GO:0045089	positive regulation of innate immune response	19/1464	213/18866	0.296712	0.998735	0.986834	CD209/COCH/LILRA2/ZCCHC3/IFI16/CLEC10A/CARD11/IKBKB/ICAM2/SLAMF6/TAB1/IRF7/EP300/PRKACA/ZBP1/MAVS/POLR3D/RAF1/DHX9	19
BP	GO:0002829	negative regulation of type 2 immune response	2/1464	14/18866	0.297111	0.998735	0.986834	IFNL1/STAT6	2
BP	GO:0006878	cellular copper ion homeostasis	2/1464	14/18866	0.297111	0.998735	0.986834	COX19/ATP7B	2
BP	GO:0007135	meiosis II	2/1464	14/18866	0.297111	0.998735	0.986834	REC8/HORMAD2	2
BP	GO:0010248	establishment or maintenance of transmembrane electrochemical gradient	2/1464	14/18866	0.297111	0.998735	0.986834	ATP1A2/ATP1B2	2
BP	GO:0010752	regulation of cGMP-mediated signaling	2/1464	14/18866	0.297111	0.998735	0.986834	PDE2A/NPPA	2
BP	GO:0010896	regulation of triglyceride catabolic process	2/1464	14/18866	0.297111	0.998735	0.986834	PNPLA2/PLIN5	2
BP	GO:0014857	regulation of skeletal muscle cell proliferation	2/1464	14/18866	0.297111	0.998735	0.986834	SHH/ANGPT1	2
BP	GO:0031282	regulation of guanylate cyclase activity	2/1464	14/18866	0.297111	0.998735	0.986834	GUCA1C/NOS1	2
BP	GO:0032688	negative regulation of interferon-beta production	2/1464	14/18866	0.297111	0.998735	0.986834	NLRC3/CACTIN	2
BP	GO:0034616	response to laminar fluid shear stress	2/1464	14/18866	0.297111	0.998735	0.986834	MAP2K5/KLF2	2
BP	GO:0035112	genitalia morphogenesis	2/1464	14/18866	0.297111	0.998735	0.986834	RBP4/SYCP2	2
BP	GO:0035589	G protein-coupled purinergic nucleotide receptor signaling pathway	2/1464	14/18866	0.297111	0.998735	0.986834	P2RY1/P2RY4	2
BP	GO:0035627	ceramide transport	2/1464	14/18866	0.297111	0.998735	0.986834	PLTP/CPTP	2
BP	GO:0035791	platelet-derived growth factor receptor-beta signaling pathway	2/1464	14/18866	0.297111	0.998735	0.986834	HIP1/ABL1	2
BP	GO:0036295	cellular response to increased oxygen levels	2/1464	14/18866	0.297111	0.998735	0.986834	NOX1/DNMT3B	2
BP	GO:0045059	positive thymic T cell selection	2/1464	14/18866	0.297111	0.998735	0.986834	SHH/STK11	2
BP	GO:0045605	negative regulation of epidermal cell differentiation	2/1464	14/18866	0.297111	0.998735	0.986834	SRSF6/DLL1	2
BP	GO:0045898	regulation of RNA polymerase II transcription preinitiation complex assembly	2/1464	14/18866	0.297111	0.998735	0.986834	ATF7IP/WNT10B	2
BP	GO:0046321	positive regulation of fatty acid oxidation	2/1464	14/18866	0.297111	0.998735	0.986834	CPT1A/PLIN5	2
BP	GO:0047484	regulation of response to osmotic stress	2/1464	14/18866	0.297111	0.998735	0.986834	SLC25A23/EFHD1	2
BP	GO:0048681	negative regulation of axon regeneration	2/1464	14/18866	0.297111	0.998735	0.986834	CERS2/LRIG2	2
BP	GO:0050872	white fat cell differentiation	2/1464	14/18866	0.297111	0.998735	0.986834	CTBP1/FABP4	2
BP	GO:0050930	induction of positive chemotaxis	2/1464	14/18866	0.297111	0.998735	0.986834	PGF/CXCL12	2
BP	GO:0051645	Golgi localization	2/1464	14/18866	0.297111	0.998735	0.986834	STK25/STK11	2
BP	GO:0051917	regulation of fibrinolysis	2/1464	14/18866	0.297111	0.998735	0.986834	HRG/F12	2
BP	GO:0055064	chloride ion homeostasis	2/1464	14/18866	0.297111	0.998735	0.986834	SLC12A9/SLC12A4	2
BP	GO:0060088	auditory receptor cell stereocilium organization	2/1464	14/18866	0.297111	0.998735	0.986834	SCRIB/TRIOBP	2
BP	GO:0060397	growth hormone receptor signaling pathway via JAK-STAT	2/1464	14/18866	0.297111	0.998735	0.986834	GH2/STAT6	2
BP	GO:0060732	positive regulation of inositol phosphate biosynthetic process	2/1464	14/18866	0.297111	0.998735	0.986834	PTH1R/P2RY1	2
BP	GO:0061983	meiosis II cell cycle process	2/1464	14/18866	0.297111	0.998735	0.986834	REC8/HORMAD2	2
BP	GO:0071285	cellular response to lithium ion	2/1464	14/18866	0.297111	0.998735	0.986834	SHH/FABP4	2
BP	GO:0090128	regulation of synapse maturation	2/1464	14/18866	0.297111	0.998735	0.986834	ARHGEF15/DAB2IP	2
BP	GO:0090161	Golgi ribbon formation	2/1464	14/18866	0.297111	0.998735	0.986834	STX16/NUMA1	2
BP	GO:0090178	regulation of establishment of planar polarity involved in neural tube closure	2/1464	14/18866	0.297111	0.998735	0.986834	DVL1/NPHP3	2
BP	GO:0090308	regulation of DNA methylation-dependent heterochromatin assembly	2/1464	14/18866	0.297111	0.998735	0.986834	ATF7IP/SETDB1	2
BP	GO:0090399	replicative senescence	2/1464	14/18866	0.297111	0.998735	0.986834	TERT/CTC1	2
BP	GO:0090713	immunological memory process	2/1464	14/18866	0.297111	0.998735	0.986834	TSC1/IFNL1	2
BP	GO:0106070	regulation of adenylate cyclase-activating G protein-coupled receptor signaling pathway	2/1464	14/18866	0.297111	0.998735	0.986834	NOS1/MRAP	2
BP	GO:0110154	RNA decapping	2/1464	14/18866	0.297111	0.998735	0.986834	PATL2/EDC4	2
BP	GO:0110156	methylguanosine-cap decapping	2/1464	14/18866	0.297111	0.998735	0.986834	PATL2/EDC4	2
BP	GO:1900452	regulation of long-term synaptic depression	2/1464	14/18866	0.297111	0.998735	0.986834	KCNB1/PPP1R9A	2
BP	GO:1901569	fatty acid derivative catabolic process	2/1464	14/18866	0.297111	0.998735	0.986834	ACAT1/BDH1	2
BP	GO:1901626	regulation of postsynaptic membrane organization	2/1464	14/18866	0.297111	0.998735	0.986834	LRP4/SHISA6	2
BP	GO:1901678	iron coordination entity transport	2/1464	14/18866	0.297111	0.998735	0.986834	HRG/SLC46A1	2
BP	GO:1901841	regulation of high voltage-gated calcium channel activity	2/1464	14/18866	0.297111	0.998735	0.986834	NPPA/CACNB2	2
BP	GO:1904925	positive regulation of autophagy of mitochondrion in response to mitochondrial depolarization	2/1464	14/18866	0.297111	0.998735	0.986834	VPS13C/CDC37	2
BP	GO:1990822	basic amino acid transmembrane transport	2/1464	14/18866	0.297111	0.998735	0.986834	SLC7A6/SLC7A4	2
BP	GO:0044782	cilium organization	34/1464	397/18866	0.298281	0.998735	0.986834	LAMA5/WRAP73/SYNE2/WDR19/CEP192/TMEM80/TTC21A/TPGS1/WDR11/WDR90/TCHP/CDK10/CEP70/AVIL/BBIP1/STK36/CCDC66/RABEP2/BBS2/NPHP3/FAM161B/TAPT1/ATAT1/NPHP4/HAUS5/IFT140/ABLIM3/RPGRIP1/PRKACA/RAB8A/TTBK2/SFI1/ODF2/PTPN23	34
BP	GO:1904019	epithelial cell apoptotic process	11/1464	117/18866	0.298454	0.998735	0.986834	TERT/SRSF6/FGB/ITGA4/CAPN10/ABL1/DAB2IP/ARRB2/STK4/ANGPT1/SIX3	11
BP	GO:0000041	transition metal ion transport	12/1464	129/18866	0.299269	0.998735	0.986834	SLC40A1/SLC39A12/ATP13A1/HRG/SLC39A10/SLC46A1/ATP7B/MCOLN1/ATP6V0A1/SLC39A2/SLC25A37/FKBP4	12
BP	GO:0070192	chromosome organization involved in meiotic cell cycle	7/1464	70/18866	0.299374	0.998735	0.986834	SUN1/REC8/BAG6/AGO4/SYCP2/CCNE1/HORMAD2	7
BP	GO:0007140	male meiotic nuclear division	5/1464	47/18866	0.299593	0.998735	0.986834	UBR2/REC8/AGO4/SYCP2/SPDYA	5
BP	GO:0016073	snRNA metabolic process	5/1464	47/18866	0.299593	0.998735	0.986834	INTS3/ZCCHC8/EXOSC6/INTS1/EXOSC7	5
BP	GO:0034204	lipid translocation	5/1464	47/18866	0.299593	0.998735	0.986834	XKR8/ABCC1/XKR6/ATP8B1/SLC4A1	5
BP	GO:0048599	oocyte development	5/1464	47/18866	0.299593	0.998735	0.986834	REC8/PABPC1L/CDC25B/KMT2D/PDE5A	5
BP	GO:0031349	positive regulation of defense response	33/1464	385/18866	0.300039	0.998735	0.986834	CD209/COCH/LILRA2/ZCCHC3/IFI16/CCR7/MAPK13/CLEC10A/ABCC1/CARD11/F12/MMP8/IKBKB/FABP4/PDE2A/ICAM2/SLAMF6/TAB1/NLRP10/IL17D/SIGLEC16/NPPA/IRF7/NOD1/TICAM1/EP300/IL17A/PRKACA/ZBP1/MAVS/POLR3D/RAF1/DHX9	33
BP	GO:1903533	regulation of protein targeting	8/1464	82/18866	0.303243	0.998735	0.986834	C2CD5/HPS4/KCNB1/MTCL1/MIEF1/UBL4B/ABLIM3/USP36	8
BP	GO:0001569	branching involved in blood vessel morphogenesis	4/1464	36/18866	0.304553	0.998735	0.986834	SHH/ABL1/STK4/SIRT6	4
BP	GO:0002701	negative regulation of production of molecular mediator of immune response	4/1464	36/18866	0.304553	0.998735	0.986834	THOC1/FCGR2B/PARP3/BST2	4
BP	GO:0016180	snRNA processing	4/1464	36/18866	0.304553	0.998735	0.986834	INTS3/EXOSC6/INTS1/EXOSC7	4
BP	GO:0032205	negative regulation of telomere maintenance	4/1464	36/18866	0.304553	0.998735	0.986834	CTC1/HNRNPA1/HNRNPC/PIF1	4
BP	GO:0032435	negative regulation of proteasomal ubiquitin-dependent protein catabolic process	4/1464	36/18866	0.304553	0.998735	0.986834	SHH/USP7/OGT/BAG6	4
BP	GO:0043368	positive T cell selection	4/1464	36/18866	0.304553	0.998735	0.986834	SHH/SLAMF6/STK11/STAT6	4
BP	GO:0090313	regulation of protein targeting to membrane	4/1464	36/18866	0.304553	0.998735	0.986834	C2CD5/KCNB1/MTCL1/MIEF1	4
BP	GO:1905332	positive regulation of morphogenesis of an epithelium	4/1464	36/18866	0.304553	0.998735	0.986834	RREB1/ABL1/GDNF/SIRT6	4
BP	GO:0034341	response to interferon-gamma	18/1464	202/18866	0.304929	0.998735	0.986834	OAS1/OAS2/CALCOCO2/TRIM22/MRC1/CAMK2G/IRF9/CCL13/TRIM25/RAB12/CCL16/MEFV/PML/IRF7/CDC37/BST2/OASL/CCL8	18
BP	GO:0060993	kidney morphogenesis	9/1464	94/18866	0.305739	0.998735	0.986834	LAMA5/SHH/LZTS2/GPC3/NPHP3/PGF/GDNF/HOXA11/MYC	9
BP	GO:1905954	positive regulation of lipid localization	9/1464	94/18866	0.305739	0.998735	0.986834	PLTP/ADIPOQ/ACACB/ZDHHC8/RETN/PLA2G6/PLIN5/FITM1/CIDEA	9
BP	GO:0000423	mitophagy	3/1464	25/18866	0.306241	0.998735	0.986834	VPS13C/ATG14/CDC37	3
BP	GO:0000466	maturation of 5.8S rRNA from tricistronic rRNA transcript (SSU-rRNA, 5.8S rRNA, LSU-rRNA)	3/1464	25/18866	0.306241	0.998735	0.986834	NOL9/RRS1/EXOSC7	3
BP	GO:0002053	positive regulation of mesenchymal cell proliferation	3/1464	25/18866	0.306241	0.998735	0.986834	SHH/LRP5/MYC	3
BP	GO:0010447	response to acidic pH	3/1464	25/18866	0.306241	0.998735	0.986834	LGMN/NOX1/ASIC1	3
BP	GO:0010738	regulation of protein kinase A signaling	3/1464	25/18866	0.306241	0.998735	0.986834	ADIPOQ/PRKAR1B/AKAP1	3
BP	GO:0014829	vascular associated smooth muscle contraction	3/1464	25/18866	0.306241	0.998735	0.986834	BBS2/P2RX1/CD38	3
BP	GO:0032878	regulation of establishment or maintenance of cell polarity	3/1464	25/18866	0.306241	0.998735	0.986834	RICTOR/LLGL2/ROCK2	3
BP	GO:0039529	RIG-I signaling pathway	3/1464	25/18866	0.306241	0.998735	0.986834	RNF135/ZCCHC3/SEC14L1	3
BP	GO:0045662	negative regulation of myoblast differentiation	3/1464	25/18866	0.306241	0.998735	0.986834	PRICKLE1/CMTM5/DLL1	3
BP	GO:0045992	negative regulation of embryonic development	3/1464	25/18866	0.306241	0.998735	0.986834	FZD3/PRKACA/TULP3	3
BP	GO:0050927	positive regulation of positive chemotaxis	3/1464	25/18866	0.306241	0.998735	0.986834	SMAD3/PGF/CXCL12	3
BP	GO:0051788	response to misfolded protein	3/1464	25/18866	0.306241	0.998735	0.986834	ANKZF1/BAG6/F12	3
BP	GO:1904376	negative regulation of protein localization to cell periphery	3/1464	25/18866	0.306241	0.998735	0.986834	SAPCD2/MRAP/NUMB	3
BP	GO:1904385	cellular response to angiotensin	3/1464	25/18866	0.306241	0.998735	0.986834	ARID1B/HSF1/ROCK2	3
BP	GO:0032611	interleukin-1 beta production	10/1464	106/18866	0.307283	0.998735	0.986834	LILRA2/IFI16/CCR7/SMAD3/NLRP1/ARRB2/MEFV/CPTP/NOD1/IL17A	10
BP	GO:1904029	regulation of cyclin-dependent protein kinase activity	10/1464	106/18866	0.307283	0.998735	0.986834	CCNL2/CDK5RAP3/CCNL1/CDK5RAP1/CDKN1C/CNPPD1/PSRC1/SPDYA/CDC37/CCNE1	10
BP	GO:1903531	negative regulation of secretion by cell	15/1464	166/18866	0.30757	0.998735	0.986834	BCR/RAB11FIP3/KCNB1/PPP1R9A/FCGR2B/ERP29/ASIC1/P2RY1/ADIPOQ/RSAD2/STXBP5L/HRH3/CD300A/NPFF/CIDEA	15
BP	GO:0050868	negative regulation of T cell activation	11/1464	118/18866	0.308142	0.998735	0.986834	VSIG4/MAD1L1/CLEC4G/SHH/SCRIB/FCGR2B/IFNL1/PTPN22/VTCN1/CD300A/PDE5A	11
BP	GO:0030879	mammary gland development	13/1464	142/18866	0.30846	0.998735	0.986834	OAS2/MST1/LRP5L/SCRIB/LRP5/HOXB9/ATP7B/RREB1/PML/FASN/STAT6/DHODH/XDH	13
BP	GO:0061180	mammary gland epithelium development	7/1464	71/18866	0.312027	0.998735	0.986834	MST1/LRP5L/SCRIB/LRP5/RREB1/PML/STAT6	7
BP	GO:1901880	negative regulation of protein depolymerization	7/1464	71/18866	0.312027	0.998735	0.986834	AVIL/TRIOBP/PLEKHH2/TTBK2/FLII/SPTBN1/ADD1	7
BP	GO:2000243	positive regulation of reproductive process	8/1464	83/18866	0.314954	0.998735	0.986834	SHH/P2RY1/RETN/CDC25B/PRDM14/CACNA1H/PDE5A/NR5A1	8
BP	GO:0002820	negative regulation of adaptive immune response	5/1464	48/18866	0.315175	0.998735	0.986834	THOC1/TRIM27/CLEC4G/FCGR2B/PARP3	5
BP	GO:0008206	bile acid metabolic process	5/1464	48/18866	0.315175	0.998735	0.986834	GBA2/OSBPL2/ATP8B1/OSBPL7/CYP8B1	5
BP	GO:0043039	tRNA aminoacylation	5/1464	48/18866	0.315175	0.998735	0.986834	AARS2/CARS2/VARS2/QRSL1/SARS2	5
BP	GO:0046461	neutral lipid catabolic process	5/1464	48/18866	0.315175	0.998735	0.986834	PNPLA1/MGLL/FABP4/PNPLA2/PLIN5	5
BP	GO:0046464	acylglycerol catabolic process	5/1464	48/18866	0.315175	0.998735	0.986834	PNPLA1/MGLL/FABP4/PNPLA2/PLIN5	5
BP	GO:0060324	face development	5/1464	48/18866	0.315175	0.998735	0.986834	ANKRD11/ARID5B/ALDH1A2/EP300/RAF1	5
BP	GO:1900271	regulation of long-term synaptic potentiation	5/1464	48/18866	0.315175	0.998735	0.986834	LGMN/YTHDF1/PPP1R9A/NCSTN/ABL1	5
BP	GO:1904036	negative regulation of epithelial cell apoptotic process	5/1464	48/18866	0.315175	0.998735	0.986834	TERT/SRSF6/FGB/ABL1/ANGPT1	5
BP	GO:0048814	regulation of dendrite morphogenesis	9/1464	95/18866	0.316685	0.998735	0.986834	UBE3A/PARP6/SS18L1/GORASP1/CAPRIN2/PPP1R9A/CUL7/STK11/FBXO31	9
BP	GO:0035601	protein deacylation	10/1464	107/18866	0.317591	0.998735	0.986834	CTBP1/SIN3B/NEK3/AKAP8L/EP300/AKAP8/HDAC5/MTA1/BAZ2A/SIRT6	10
BP	GO:0090174	organelle membrane fusion	10/1464	107/18866	0.317591	0.998735	0.986834	C2CD5/STX16/ATP13A2/ANKFY1/STX17/TSNARE1/SEC22B/RAB8A/VAMP1/VPS39	10
BP	GO:0051924	regulation of calcium ion transport	22/1464	253/18866	0.32001	0.998735	0.986834	HOMER3/LILRA2/CXCR4/TRIM27/EPB41/GSTM2/CAMK2G/CACNG6/NOS1/ABL1/P2RX1/ARRB2/ATP1A2/PLA2G6/NPPA/PML/PRKACA/BEST1/CACNB2/CXCL12/CAPN3/LPAR3	22
BP	GO:0001836	release of cytochrome c from mitochondria	6/1464	60/18866	0.321244	0.998735	0.986834	HGF/ARRB2/PLA2G6/CIDEB/FXN/PAM16	6
BP	GO:0007602	phototransduction	6/1464	60/18866	0.321244	0.998735	0.986834	GUCA1C/OPN5/GPR52/GRK1/CABP4/OPN4	6
BP	GO:0010823	negative regulation of mitochondrion organization	6/1464	60/18866	0.321244	0.998735	0.986834	ADCK1/HGF/MPV17L/ARRB2/FXN/PAM16	6
BP	GO:0030865	cortical cytoskeleton organization	6/1464	60/18866	0.321244	0.998735	0.986834	EPB41/LLGL2/STRIP1/IKBKB/TLN1/ROCK2	6
BP	GO:0035036	sperm-egg recognition	6/1464	60/18866	0.321244	0.998735	0.986834	HVCN1/FOLR2/OVGP1/CATSPER3/FOLR1/UBAP2L	6
BP	GO:0050994	regulation of lipid catabolic process	6/1464	60/18866	0.321244	0.998735	0.986834	CPT1A/ACACB/PNPLA2/PLIN5/LGALS12/CIDEA	6
BP	GO:0060042	retina morphogenesis in camera-type eye	6/1464	60/18866	0.321244	0.998735	0.986834	RBP4/LRP5/DLL1/RPGRIP1/RDH13/CABP4	6
BP	GO:0010667	negative regulation of cardiac muscle cell apoptotic process	4/1464	37/18866	0.322578	0.998735	0.986834	HSPB6/HSF1/RGL2/PPP1R10	4
BP	GO:0032717	negative regulation of interleukin-8 production	4/1464	37/18866	0.322578	0.998735	0.986834	MAP2K5/CACTIN/SSC5D/PTPN22	4
BP	GO:0045191	regulation of isotype switching	4/1464	37/18866	0.322578	0.998735	0.986834	THOC1/EXOSC6/PARP3/STAT6	4
BP	GO:0048846	axon extension involved in axon guidance	4/1464	37/18866	0.322578	0.998735	0.986834	SEMA3G/MEGF8/SEMA3B/CXCL12	4
BP	GO:0060428	lung epithelium development	4/1464	37/18866	0.322578	0.998735	0.986834	SRSF6/KLF2/SHH/SPDEF	4
BP	GO:0060969	negative regulation of gene silencing	4/1464	37/18866	0.322578	0.998735	0.986834	TERT/NCOR1/DND1/ADAR	4
BP	GO:0086010	membrane depolarization during action potential	4/1464	37/18866	0.322578	0.998735	0.986834	KCNJ2/ATP1A2/CACNA1H/CACNB2	4
BP	GO:1902284	neuron projection extension involved in neuron projection guidance	4/1464	37/18866	0.322578	0.998735	0.986834	SEMA3G/MEGF8/SEMA3B/CXCL12	4
BP	GO:0060271	cilium assembly	32/1464	377/18866	0.323598	0.998735	0.986834	LAMA5/WRAP73/SYNE2/WDR19/CEP192/TMEM80/TPGS1/WDR11/WDR90/TCHP/CDK10/CEP70/AVIL/BBIP1/STK36/CCDC66/RABEP2/BBS2/NPHP3/TAPT1/ATAT1/NPHP4/HAUS5/IFT140/ABLIM3/RPGRIP1/PRKACA/RAB8A/TTBK2/SFI1/ODF2/PTPN23	32
BP	GO:0050920	regulation of chemotaxis	20/1464	229/18866	0.323663	0.998735	0.986834	CXCR4/CCR7/MST1/PPM1F/LGMN/YTHDF1/HRG/SMAD3/SEMA3G/PTPRO/ZSWIM8/DEFB124/MEGF8/ZNF580/CCL27/PGF/TIRAP/SEMA3B/CXCL12/CXCR2	20
BP	GO:0046834	lipid phosphorylation	7/1464	72/18866	0.324776	0.998735	0.986834	DGKA/IP6K2/DGKQ/PIK3R6/IP6K1/DGKD/DGKE	7
BP	GO:0051937	catecholamine transport	7/1464	72/18866	0.324776	0.998735	0.986834	NISCH/SYT15/KCNB1/P2RY1/GDNF/HRH3/CXCL12	7
BP	GO:0034401	chromatin organization involved in regulation of transcription	14/1464	156/18866	0.32523	0.998735	0.986834	ATF7IP/EZH1/CTBP1/UBR2/PABPC1L/ARID1B/SETDB1/NAA40/KMT2D/SMARCD1/HDAC5/ZMIZ2/BAZ2A/SIRT6	14
BP	GO:1902904	negative regulation of supramolecular fiber organization	14/1464	156/18866	0.32523	0.998735	0.986834	SSH3/ARHGEF18/PPP1R9A/SSH2/AVIL/PICK1/TRIOBP/PLEKHH2/FKBP4/TTBK2/FLII/SPTBN1/MYOC/ADD1	14
BP	GO:0050921	positive regulation of chemotaxis	13/1464	144/18866	0.326291	0.998735	0.986834	CXCR4/CCR7/PPM1F/LGMN/SMAD3/DEFB124/MEGF8/ZNF580/CCL27/PGF/TIRAP/CXCL12/CXCR2	13
BP	GO:0000098	sulfur amino acid catabolic process	2/1464	15/18866	0.326621	0.998735	0.986834	CSAD/MPST	2
BP	GO:0000463	maturation of LSU-rRNA from tricistronic rRNA transcript (SSU-rRNA, 5.8S rRNA, LSU-rRNA)	2/1464	15/18866	0.326621	0.998735	0.986834	NOL9/RPL7L1	2
BP	GO:0002864	regulation of acute inflammatory response to antigenic stimulus	2/1464	15/18866	0.326621	0.998735	0.986834	CCR7/FCGR2B	2
BP	GO:0007216	G protein-coupled glutamate receptor signaling pathway	2/1464	15/18866	0.326621	0.998735	0.986834	HOMER3/GRM4	2
BP	GO:0009404	toxin metabolic process	2/1464	15/18866	0.326621	0.998735	0.986834	AS3MT/TH	2
BP	GO:0014856	skeletal muscle cell proliferation	2/1464	15/18866	0.326621	0.998735	0.986834	SHH/ANGPT1	2
BP	GO:0030852	regulation of granulocyte differentiation	2/1464	15/18866	0.326621	0.998735	0.986834	C1QC/ADIPOQ	2
BP	GO:0031054	pre-miRNA processing	2/1464	15/18866	0.326621	0.998735	0.986834	AGO4/ADAR	2
BP	GO:0032105	negative regulation of response to extracellular stimulus	2/1464	15/18866	0.326621	0.998735	0.986834	BBS2/NPFF	2
BP	GO:0032108	negative regulation of response to nutrient levels	2/1464	15/18866	0.326621	0.998735	0.986834	BBS2/NPFF	2
BP	GO:0032785	negative regulation of DNA-templated transcription, elongation	2/1464	15/18866	0.326621	0.998735	0.986834	SHH/NELFCD	2
BP	GO:0033689	negative regulation of osteoblast proliferation	2/1464	15/18866	0.326621	0.998735	0.986834	SMAD3/EIF2AK2	2
BP	GO:0034638	phosphatidylcholine catabolic process	2/1464	15/18866	0.326621	0.998735	0.986834	PLA2G6/PLA2G15	2
BP	GO:0036376	sodium ion export across plasma membrane	2/1464	15/18866	0.326621	0.998735	0.986834	ATP1A2/ATP1B2	2
BP	GO:0042574	retinal metabolic process	2/1464	15/18866	0.326621	0.998735	0.986834	ALDH1A2/RDH13	2
BP	GO:0042754	negative regulation of circadian rhythm	2/1464	15/18866	0.326621	0.998735	0.986834	CRY2/CIPC	2
BP	GO:0044406	adhesion of symbiont to host	2/1464	15/18866	0.326621	0.998735	0.986834	CD209/CLEC4M	2
BP	GO:0045475	locomotor rhythm	2/1464	15/18866	0.326621	0.998735	0.986834	NCOR1/MTA1	2
BP	GO:0048070	regulation of developmental pigmentation	2/1464	15/18866	0.326621	0.998735	0.986834	HPS4/SPNS2	2
BP	GO:0048484	enteric nervous system development	2/1464	15/18866	0.326621	0.998735	0.986834	GDNF/RET	2
BP	GO:0055057	neuroblast division	2/1464	15/18866	0.326621	0.998735	0.986834	DCT/NUMB	2
BP	GO:0060026	convergent extension	2/1464	15/18866	0.326621	0.998735	0.986834	DVL1/NPHP3	2
BP	GO:0060253	negative regulation of glial cell proliferation	2/1464	15/18866	0.326621	0.998735	0.986834	TERT/CERS2	2
BP	GO:0060347	heart trabecula formation	2/1464	15/18866	0.326621	0.998735	0.986834	RBP4/BMP10	2
BP	GO:0070571	negative regulation of neuron projection regeneration	2/1464	15/18866	0.326621	0.998735	0.986834	CERS2/LRIG2	2
BP	GO:0071428	rRNA-containing ribonucleoprotein complex export from nucleus	2/1464	15/18866	0.326621	0.998735	0.986834	TSC1/RRS1	2
BP	GO:0072075	metanephric mesenchyme development	2/1464	15/18866	0.326621	0.998735	0.986834	SHH/MYC	2
BP	GO:0072567	chemokine (C-X-C motif) ligand 2 production	2/1464	15/18866	0.326621	0.998735	0.986834	MAP2K5/TIRAP	2
BP	GO:0090177	establishment of planar polarity involved in neural tube closure	2/1464	15/18866	0.326621	0.998735	0.986834	DVL1/NPHP3	2
BP	GO:0090192	regulation of glomerulus development	2/1464	15/18866	0.326621	0.998735	0.986834	ADIPOQ/RET	2
BP	GO:1900037	regulation of cellular response to hypoxia	2/1464	15/18866	0.326621	0.998735	0.986834	USP19/ROCK2	2
BP	GO:1900119	positive regulation of execution phase of apoptosis	2/1464	15/18866	0.326621	0.998735	0.986834	HSF1/RPS3	2
BP	GO:1904889	regulation of excitatory synapse assembly	2/1464	15/18866	0.326621	0.998735	0.986834	LRFN4/LRFN1	2
BP	GO:1904923	regulation of autophagy of mitochondrion in response to mitochondrial depolarization	2/1464	15/18866	0.326621	0.998735	0.986834	VPS13C/CDC37	2
BP	GO:1905146	lysosomal protein catabolic process	2/1464	15/18866	0.326621	0.998735	0.986834	MFSD8/ATP13A2	2
BP	GO:1905820	positive regulation of chromosome separation	2/1464	15/18866	0.326621	0.998735	0.986834	CDC16/NUMA1	2
BP	GO:2000341	regulation of chemokine (C-X-C motif) ligand 2 production	2/1464	15/18866	0.326621	0.998735	0.986834	MAP2K5/TIRAP	2
BP	GO:2000345	regulation of hepatocyte proliferation	2/1464	15/18866	0.326621	0.998735	0.986834	LIMS2/GLI1	2
BP	GO:2000402	negative regulation of lymphocyte migration	2/1464	15/18866	0.326621	0.998735	0.986834	APOD/MIA3	2
BP	GO:0000045	autophagosome assembly	9/1464	96/18866	0.327711	0.998735	0.986834	TBC1D14/ATG16L2/PACS2/STX17/RALB/ATG14/SEC22B/ATG2A/ATG16L1	9
BP	GO:0002690	positive regulation of leukocyte chemotaxis	9/1464	96/18866	0.327711	0.998735	0.986834	CCR7/LGMN/DEFB124/ZNF580/CCL27/PGF/TIRAP/CXCL12/CXCR2	9
BP	GO:0006303	double-strand break repair via nonhomologous end joining	9/1464	96/18866	0.327711	0.998735	0.986834	HSF1/PARP3/POLM/DCLRE1C/UIMC1/MDC1/KAT5/ERCC8/HERC2	9
BP	GO:0001523	retinoid metabolic process	10/1464	108/18866	0.327974	0.998735	0.986834	ADH1B/RBP4/CYP26A1/GPC3/PNPLA2/ALDH1A2/CYP2C8/RETSAT/RDH13/GPIHBP1	10
BP	GO:0008593	regulation of Notch signaling pathway	10/1464	108/18866	0.327974	0.998735	0.986834	YJEFN3/CBFA2T2/LLGL2/MAGEA1/MFNG/DLL1/EP300/METTL3/HIF1AN/MAML1	10
BP	GO:0007064	mitotic sister chromatid cohesion	3/1464	26/18866	0.328125	0.998735	0.986834	MAU2/REC8/POGZ	3
BP	GO:0032743	positive regulation of interleukin-2 production	3/1464	26/18866	0.328125	0.998735	0.986834	CARD11/RPS3/SPTBN1	3
BP	GO:0033119	negative regulation of RNA splicing	3/1464	26/18866	0.328125	0.998735	0.986834	SRSF6/PCBP4/U2AF2	3
BP	GO:0033522	histone H2A ubiquitination	3/1464	26/18866	0.328125	0.998735	0.986834	UBR2/RING1/UBR5	3
BP	GO:0042730	fibrinolysis	3/1464	26/18866	0.328125	0.998735	0.986834	FGB/HRG/F12	3
BP	GO:0043951	negative regulation of cAMP-mediated signaling	3/1464	26/18866	0.328125	0.998735	0.986834	MRAP/PDE2A/MGRN1	3
BP	GO:0044068	modulation by symbiont of host cellular process	3/1464	26/18866	0.328125	0.998735	0.986834	SCRIB/PABPN1/KPNA5	3
BP	GO:0048643	positive regulation of skeletal muscle tissue development	3/1464	26/18866	0.328125	0.998735	0.986834	SHH/FLOT1/DLL1	3
BP	GO:0050926	regulation of positive chemotaxis	3/1464	26/18866	0.328125	0.998735	0.986834	SMAD3/PGF/CXCL12	3
BP	GO:0051654	establishment of mitochondrion localization	3/1464	26/18866	0.328125	0.998735	0.986834	MYO19/TRAK1/RHOT2	3
BP	GO:0060074	synapse maturation	3/1464	26/18866	0.328125	0.998735	0.986834	ARHGEF15/DAB2IP/BCAN	3
BP	GO:0060314	regulation of ryanodine-sensitive calcium-release channel activity	3/1464	26/18866	0.328125	0.998735	0.986834	GSTM2/NOS1/PRKACA	3
BP	GO:0060384	innervation	3/1464	26/18866	0.328125	0.998735	0.986834	ITGA4/RET/LRIG2	3
BP	GO:0070633	transepithelial transport	3/1464	26/18866	0.328125	0.998735	0.986834	ABCC1/P2RY4/BEST1	3
BP	GO:0071377	cellular response to glucagon stimulus	3/1464	26/18866	0.328125	0.998735	0.986834	PRKAR1B/PRKACA/ADCY4	3
BP	GO:0090023	positive regulation of neutrophil chemotaxis	3/1464	26/18866	0.328125	0.998735	0.986834	CCR7/TIRAP/CXCR2	3
BP	GO:0090025	regulation of monocyte chemotaxis	3/1464	26/18866	0.328125	0.998735	0.986834	LGMN/DEFB124/CXCL12	3
BP	GO:1902914	regulation of protein polyubiquitination	3/1464	26/18866	0.328125	0.998735	0.986834	PARP10/PTPN22/UBR5	3
BP	GO:1903010	regulation of bone development	3/1464	26/18866	0.328125	0.998735	0.986834	KAT2A/SLC9B2/TAPT1	3
BP	GO:0010876	lipid localization	37/1464	440/18866	0.328336	0.998735	0.986834	OSBPL2/CPT1A/YJEFN3/CHKA/SLC25A20/RBP4/XKR8/SHH/PRKAB2/PLTP/OSBPL10/THRSP/ABCC1/XKR6/ATP8B1/ADIPOQ/NMUR2/ACACB/OSBPL7/PITPNB/SLC27A3/SLC4A1/ZDHHC8/RETN/FABP4/CFHR4/APOD/SPNS2/PNPLA2/PLA2G6/SLCO1A2/PLIN5/CPTP/PROCA1/FITM1/ABCD4/CIDEA	37
BP	GO:0051495	positive regulation of cytoskeleton organization	20/1464	230/18866	0.330757	0.998735	0.986834	TSC1/TRIM27/CCR7/PPM1F/RICTOR/SMAD3/ARHGEF15/TESK1/NUMA1/ABL1/CCL27/OCLN/PICK1/PSRC1/RPS3/BMP10/ROCK2/ACTR3B/MYOC/MYLK3	20
BP	GO:0002673	regulation of acute inflammatory response	5/1464	49/18866	0.330855	0.998735	0.986834	CCR7/DNASE1/FCGR2B/F12/RHBDD3	5
BP	GO:0002686	negative regulation of leukocyte migration	5/1464	49/18866	0.330855	0.998735	0.986834	BCR/APOD/CXCL12/CD300A/MIA3	5
BP	GO:0030850	prostate gland development	5/1464	49/18866	0.330855	0.998735	0.986834	UBE3A/SHH/GLI1/STK11/FKBP4	5
BP	GO:0034260	negative regulation of GTPase activity	5/1464	49/18866	0.330855	0.998735	0.986834	TSC1/DAB2IP/TNK2/ARRB2/CPEB2	5
BP	GO:0043038	amino acid activation	5/1464	49/18866	0.330855	0.998735	0.986834	AARS2/CARS2/VARS2/QRSL1/SARS2	5
BP	GO:0047496	vesicle transport along microtubule	5/1464	49/18866	0.330855	0.998735	0.986834	TRAK1/NDEL1/KIF5A/STK11/AP3D1	5
BP	GO:0086009	membrane repolarization	5/1464	49/18866	0.330855	0.998735	0.986834	KCNJ2/ATP1A2/KCNIP2/NPPA/ATP1B2	5
BP	GO:2000059	negative regulation of ubiquitin-dependent protein catabolic process	5/1464	49/18866	0.330855	0.998735	0.986834	SHH/USP7/OGT/BAG6/PML	5
BP	GO:0016125	sterol metabolic process	15/1464	169/18866	0.332318	0.998735	0.986834	GBA2/DGKQ/HSD17B7/CYP26A1/ACADVL/LRP5/SERPINA12/ACACB/CYP2C9/FAXDC2/NFYC/SCAP/FASN/CYP8B1/LMF1	15
BP	GO:0098739	import across plasma membrane	14/1464	157/18866	0.333863	0.998735	0.986834	SLC7A8/SLC39A12/WNK2/FOLR2/SLC39A10/SLC12A9/SLC46A1/KCNJ2/SLC43A1/KCNK9/ATP1A2/SLC12A4/FOLR1/ATP1B2	14
BP	GO:0042733	embryonic digit morphogenesis	6/1464	61/18866	0.335294	0.998735	0.986834	SHH/LRP5/IFT140/HOXA11/LRP4/TULP3	6
BP	GO:0090303	positive regulation of wound healing	6/1464	61/18866	0.335294	0.998735	0.986834	CXCR4/HRG/F12/RREB1/OCLN/DUOX2	6
BP	GO:1904356	regulation of telomere maintenance via telomere lengthening	6/1464	61/18866	0.335294	0.998735	0.986834	CTC1/HNRNPA1/HMBOX1/MAP3K4/HNRNPC/PIF1	6
BP	GO:0033135	regulation of peptidyl-serine phosphorylation	13/1464	145/18866	0.335294	0.998735	0.986834	SH2D3A/PPM1F/RICTOR/CAPRIN2/HGF/NOS1/ARRB2/RET/STK4/IFNA4/ANGPT1/RAF1/GPD1L	13
BP	GO:0071322	cellular response to carbohydrate stimulus	13/1464	145/18866	0.335294	0.998735	0.986834	SLC9B2/KCNB1/MAPK13/PRKCB/ZNF236/LRP5L/LRP5/POLG/TH/PLA2G6/PRKACA/NADK/RAF1	13
BP	GO:0043405	regulation of MAP kinase activity	29/1464	342/18866	0.336128	0.998735	0.986834	MAP2K5/CXCR4/FGD2/CDK5RAP3/TP73/STK38/MAP3K4/HGF/ERP29/ADIPOQ/TRIB2/PIK3R6/DAB2IP/TAB1/PIK3R5/RET/GRM4/NPPA/MAP3K1/NOD1/DAXX/PTPN22/RPS3/EIF2AK2/CD300A/PDE5A/RAF1/MADD/LPAR3	29
BP	GO:0006165	nucleoside diphosphate phosphorylation	12/1464	133/18866	0.336571	0.998735	0.986834	ADPGK/DHTKD1/FOXK1/OGT/PKLR/NCOR1/SLC4A1/POM121/OGDH/EP300/ENO3/SIRT6	12
BP	GO:0046394	carboxylic acid biosynthetic process	31/1464	367/18866	0.337072	0.998735	0.986834	RIMKLB/ABCC5/OSBPL2/PDK4/GSTM2/PRKAB2/ACADVL/ACSS1/PKLR/CARNS1/HOGA1/GSTM4/ADIPOQ/GSTM1/ACACB/ILVBL/MGLL/OSBPL7/CHST12/ALDH1A2/BCAT2/CYP2C9/CYP2C8/ACMSD/BCAN/SCAP/FASN/ACSBG2/CYP8B1/NCAN/TECR	31
BP	GO:0015807	L-amino acid transport	7/1464	73/18866	0.337606	0.998735	0.986834	SLC7A8/SLC38A5/SLC7A6/SLC38A1/SLC43A1/ATP1A2/SLC38A7	7
BP	GO:0051155	positive regulation of striated muscle cell differentiation	7/1464	73/18866	0.337606	0.998735	0.986834	KAT2A/SHH/FLOT1/ARRB2/BMP10/MAML1/MYLK3	7
BP	GO:1901292	nucleoside phosphate catabolic process	7/1464	73/18866	0.337606	0.998735	0.986834	NUDT3/ACAT1/PDE2A/PDE8A/PDE5A/PDE7A/XDH	7
BP	GO:1902117	positive regulation of organelle assembly	7/1464	73/18866	0.337606	0.998735	0.986834	WRAP73/PAN2/NUMA1/TAPT1/RALB/BMP10/MYLK3	7
BP	GO:1903779	regulation of cardiac conduction	7/1464	73/18866	0.337606	0.998735	0.986834	NOS1/FXYD7/ATP1A2/NPPA/PRKACA/DMPK/ATP1B2	7
BP	GO:0032612	interleukin-1 production	11/1464	121/18866	0.337639	0.998735	0.986834	LILRA2/IFI16/CCR7/SMAD3/NLRP1/ARRB2/NLRP10/MEFV/CPTP/NOD1/IL17A	11
BP	GO:0120254	olefinic compound metabolic process	11/1464	121/18866	0.337639	0.998735	0.986834	DGKQ/GSTM2/GSTM1/MGLL/ALDH1A2/CYP2A6/CYP2C9/CYP2C8/CACNA1H/RDH13/CYP2A7	11
BP	GO:1900542	regulation of purine nucleotide metabolic process	11/1464	121/18866	0.337639	0.998735	0.986834	PDK4/GUCA1C/OGT/NCOR1/NOS1/PDPR/SLC4A1/POM121/EP300/PDK2/SIRT6	11
BP	GO:0015850	organic hydroxy compound transport	23/1464	268/18866	0.337925	0.998735	0.986834	OSBPL2/YJEFN3/NISCH/SYT15/RBP4/SHH/KCNB1/PLTP/OSBPL10/NOS1/MFSD10/ATP8B1/P2RY1/ADIPOQ/OSBPL7/ZDHHC8/RALBP1/GDNF/P2RX1/SLCO1A2/EMB/HRH3/CXCL12	23
BP	GO:0006939	smooth muscle contraction	10/1464	109/18866	0.338422	0.998735	0.986834	TNNI3/NMUR2/BBS2/GDNF/P2RX1/CD38/ATP1A2/PLA2G6/SMTN/ROCK2	10
BP	GO:0072384	organelle transport along microtubule	8/1464	85/18866	0.338626	0.998735	0.986834	SUN1/TRAK1/SYNE2/RHOT2/NDEL1/KIF5A/STK11/AP3D1	8
BP	GO:0098659	inorganic cation import across plasma membrane	9/1464	97/18866	0.338808	0.998735	0.986834	SLC39A12/WNK2/SLC39A10/SLC12A9/KCNJ2/KCNK9/ATP1A2/SLC12A4/ATP1B2	9
BP	GO:0099587	inorganic ion import across plasma membrane	9/1464	97/18866	0.338808	0.998735	0.986834	SLC39A12/WNK2/SLC39A10/SLC12A9/KCNJ2/KCNK9/ATP1A2/SLC12A4/ATP1B2	9
BP	GO:0120162	positive regulation of cold-induced thermogenesis	9/1464	97/18866	0.338808	0.998735	0.986834	CXCR4/PRKAB2/OGT/PPARGC1B/ADIPOQ/HSF1/FABP4/STAT6/SIRT6	9
BP	GO:1990868	response to chemokine	9/1464	97/18866	0.338808	0.998735	0.986834	CXCR4/CCR7/CCL13/MPL/CCL16/GPR75/CCL8/CXCL12/CXCR2	9
BP	GO:1990869	cellular response to chemokine	9/1464	97/18866	0.338808	0.998735	0.986834	CXCR4/CCR7/CCL13/MPL/CCL16/GPR75/CCL8/CXCL12/CXCR2	9
BP	GO:0016311	dephosphorylation	41/1464	492/18866	0.338932	0.998735	0.986834	PPP1R3E/INPP5E/TSC1/URI1/CEP192/SSH3/SYMPK/CDK5RAP3/PPM1K/CAMK2G/PPM1F/MTMR11/SMAD3/SSH2/SLC39A10/PPARGC1B/PTPRO/PPP3CC/IKBKB/PPP6R2/PPP1R35/PGP/TAB1/CABIN1/ATP1A2/CDC25B/STK11/ARPP19/PTPN22/SFI1/PHACTR1/CRY2/DMPK/ROCK2/PPP2R5D/ACP6/EIF2AK2/SBF1/CD300A/PPP1R10/PTPN23	41
BP	GO:0000075	cell cycle checkpoint	19/1464	219/18866	0.340116	0.998735	0.986834	THOC1/PCBP4/MAD1L1/INTS3/CDK5RAP3/KNTC1/RAD9A/GIGYF2/EME2/RPA4/UIMC1/MDC1/PML/MDM4/TICRR/EP300/PPP1R10/PIDD1/FBXO31	19
BP	GO:0007223	Wnt signaling pathway, calcium modulating pathway	4/1464	38/18866	0.340671	0.998735	0.986834	FZD3/TNRC6A/AGO4/PLCB2	4
BP	GO:0034661	ncRNA catabolic process	4/1464	38/18866	0.340671	0.998735	0.986834	DIS3L/ZCCHC8/EXOSC6/EXOSC7	4
BP	GO:0032970	regulation of actin filament-based process	34/1464	405/18866	0.340765	0.998735	0.986834	GBA2/TSC1/TRIM27/SSH3/CCR7/PPM1F/RICTOR/ARHGEF18/HRG/SMAD3/PPP1R9A/CDK10/ARHGEF15/SSH2/AVIL/KCNJ2/TESK1/ABL1/CCL27/ATP1A2/PICK1/TRIOBP/PLEKHH2/ARHGAP17/BST2/BMP10/ROCK2/CXCL12/FLII/SPTBN1/ACTR3B/MYOC/MYLK3/ADD1	34
BP	GO:0006644	phospholipid metabolic process	38/1464	455/18866	0.341315	0.998735	0.986834	EPHA8/INPP5E/CHKA/GPCPD1/PIGG/DGKA/IP6K2/CCR7/DGKQ/PIGL/CPNE1/MTMR11/OSBPL10/CHKB/PIGS/PIK3R6/CSNK2B/IP6K1/DAB2IP/PGP/PIK3R5/LPCAT4/ATG14/PLA2G6/PCYT2/ETNK2/PCYT1A/DGKD/PIGB/PLCB2/DGKE/PLA2G15/PROCA1/FITM1/ACP6/DOLPP1/SBF1/GPD1L	38
BP	GO:0050729	positive regulation of inflammatory response	14/1464	158/18866	0.342547	0.998735	0.986834	CCR7/MAPK13/ABCC1/F12/MMP8/FABP4/PDE2A/NLRP10/IL17D/NPPA/TICAM1/IL17A/ZBP1/DHX9	14
BP	GO:0016197	endosomal transport	21/1464	244/18866	0.342652	0.998735	0.986834	TBC1D14/ITSN1/RAB11FIP3/VPS52/TRIM27/VPS36/STX16/SGSM2/SCRIB/ANKFY1/TBC1D17/NUMA1/EPS15L1/HEATR5B/MVB12B/GGA1/TBC1D5/RAB8A/VPS39/AP3D1/PTPN23	21
BP	GO:0006869	lipid transport	33/1464	393/18866	0.343282	0.998735	0.986834	OSBPL2/CPT1A/YJEFN3/CHKA/SLC25A20/RBP4/XKR8/SHH/PRKAB2/PLTP/OSBPL10/THRSP/ABCC1/XKR6/ATP8B1/ADIPOQ/NMUR2/ACACB/OSBPL7/PITPNB/SLC27A3/SLC4A1/ZDHHC8/RETN/FABP4/CFHR4/APOD/SPNS2/PLA2G6/SLCO1A2/CPTP/PROCA1/ABCD4	33
BP	GO:0007219	Notch signaling pathway	17/1464	195/18866	0.344593	0.998735	0.986834	APH1B/YJEFN3/TIMP4/CBFA2T2/SPEN/LLGL2/NCSTN/MIB2/MAGEA1/MFNG/DLL1/EP300/METTL3/APH1A/HIF1AN/MYC/MAML1	17
BP	GO:0019216	regulation of lipid metabolic process	36/1464	431/18866	0.346385	0.998735	0.986834	EPHA8/PDK4/CPT1A/CCR7/DGKQ/SIN3B/PRKAB2/ACADVL/NCOR1/NCOA6/PDPR/THRSP/AVIL/SERPINA12/ADIPOQ/ACACB/PIK3R6/NSMAF/SORBS1/APOD/DAB2IP/PNPLA2/PIK3R5/ATG14/PLA2G6/PLIN5/LGALS12/NFYC/SCAP/FASN/SF1/PDK2/LMF1/CIDEA/ORMDL1/NR5A1	36
BP	GO:0062012	regulation of small molecule metabolic process	38/1464	456/18866	0.346442	0.998735	0.986834	PPP1R3E/PDK4/CPT1A/KAT2A/GUCA1C/PTH1R/DGKQ/MST1/FOXK1/USP7/PRKAB2/ACADVL/OGT/CLK2/NCOR1/NOS1/PDPR/C1QTNF3/P2RY1/SERPINA12/ADIPOQ/ACACB/SLC4A1/POM121/SORBS1/PGP/ACMSD/PLIN5/NFYC/SCAP/EP300/FASN/NLN/ARPP19/PDK2/CD320/LMF1/SIRT6	38
BP	GO:0021695	cerebellar cortex development	5/1464	50/18866	0.346605	0.998735	0.986834	RERE/B4GALT2/GLI1/DLL1/TTBK2	5
BP	GO:0045646	regulation of erythrocyte differentiation	5/1464	50/18866	0.346605	0.998735	0.986834	P4HTM/BRD1/ISG15/KLF13/ANKRD54	5
BP	GO:0051653	spindle localization	5/1464	50/18866	0.346605	0.998735	0.986834	LLGL2/NDEL1/INSC/SAPCD2/NUMA1	5
BP	GO:0007051	spindle organization	16/1464	183/18866	0.346833	0.998735	0.986834	WRAP73/CEP192/KIFC2/GOLGA2P5/MSTO1/INO80/LZTS2/NCOR1/PARP3/NUMA1/HAUS5/PSRC1/EFHC1/RPS3/STARD9/KNSTRN	16
BP	GO:0017148	negative regulation of translation	19/1464	220/18866	0.347498	0.998735	0.986834	INPP5E/TSC1/RBM4/PATL2/YTHDF1/GIGYF2/CAPRIN2/EIF2AK1/DND1/TNRC6A/AGO4/ATF4/ZFP36L2/METTL3/PLEKHN1/RPS3/ROCK2/EIF2AK2/CPEB2	19
BP	GO:0001539	cilium or flagellum-dependent cell motility	11/1464	122/18866	0.347591	0.998735	0.986834	SLC9B2/TTC21A/PLTP/TPGS1/TTLL9/BBS2/SPEM1/NPHP4/CATSPER3/EFHC1/PRDM14	11
BP	GO:0060285	cilium-dependent cell motility	11/1464	122/18866	0.347591	0.998735	0.986834	SLC9B2/TTC21A/PLTP/TPGS1/TTLL9/BBS2/SPEM1/NPHP4/CATSPER3/EFHC1/PRDM14	11
BP	GO:0006289	nucleotide-excision repair	10/1464	110/18866	0.348928	0.998735	0.986834	RAD52/USP7/RPA4/FAN1/MMS19/CHD1L/UVSSA/ERCC3/ERCC8/EP300	10
BP	GO:0006641	triglyceride metabolic process	10/1464	110/18866	0.348928	0.998735	0.986834	CPT1A/PNPLA1/THRSP/SERPINA12/MGLL/FABP4/PNPLA2/ATG14/PLIN5/LMF1	10
BP	GO:0090100	positive regulation of transmembrane receptor protein serine/threonine kinase signaling pathway	10/1464	110/18866	0.348928	0.998735	0.986834	SH2B1/GPC3/CDKN1C/NUMA1/CSNK2B/BMP8B/EP300/STK11/BMP10/GDF11	10
BP	GO:0001933	negative regulation of protein phosphorylation	37/1464	444/18866	0.349035	0.998735	0.986834	DVL1/TRIM27/WNK2/DGKQ/CDK5RAP3/PPM1F/STK38/HGF/NCOR1/AMBP/MLLT1/LRP5/CDK5RAP1/CDKN1C/ADIPOQ/PTPRO/TRIB2/TESK1/FABP4/CACTIN/ABL1/DAB2IP/TAB1/OCLN/ARRB2/ATG14/PRKAR1B/CHRNA10/NPPA/PTPN22/ANGPT1/ADAR/PPP2R5D/CD300A/MYC/GPD1L/XDH	37
BP	GO:0010676	positive regulation of cellular carbohydrate metabolic process	6/1464	62/18866	0.349411	0.998735	0.986834	PPP1R3E/KAT2A/PTH1R/P2RY1/SORBS1/ARPP19	6
BP	GO:0010803	regulation of tumor necrosis factor-mediated signaling pathway	6/1464	62/18866	0.349411	0.998735	0.986834	CPNE1/ADIPOQ/IKBKB/SHARPIN/SPPL2B/MADD	6
BP	GO:0045143	homologous chromosome segregation	6/1464	62/18866	0.349411	0.998735	0.986834	SUN1/REC8/BAG6/AGO4/SYCP2/CCNE1	6
BP	GO:0042063	gliogenesis	26/1464	307/18866	0.349753	0.998735	0.986834	TERT/SUN1/CXCR4/SOX6/C1QA/SYNE2/DAAM2/CERS2/SHH/TP73/NSUN5/SCRIB/NCSTN/MBD1/P2RY1/ABL1/DAB2IP/KLF15/EIF2B4/PICK1/DLL1/METTL3/GAP43/ATP1B2/RNF112/MYOC	26
BP	GO:0072522	purine-containing compound biosynthetic process	18/1464	208/18866	0.349963	0.998735	0.986834	PDK4/GUCA1C/ACSS1/PKLR/ACAT1/NOS1/PDPR/DCAKD/PANK4/ACACB/NPPA/FASN/ACSBG2/ADCY4/PDK2/ATP6/PRPS1L1/TECR	18
BP	GO:0010657	muscle cell apoptotic process	9/1464	98/18866	0.349963	0.998735	0.986834	HSPB6/HSF1/ATF4/ARRB2/RGL2/STK4/DMPK/PPP1R10/CXCR2	9
BP	GO:0042158	lipoprotein biosynthetic process	9/1464	98/18866	0.349963	0.998735	0.986834	PIGG/ZDHHC6/PIGL/ZDHHC17/PIGS/ZDHHC8/ZDHHC7/PIGB/PORCN	9
BP	GO:0001556	oocyte maturation	3/1464	27/18866	0.349995	0.998735	0.986834	REC8/PABPC1L/CDC25B	3
BP	GO:0001702	gastrulation with mouth forming second	3/1464	27/18866	0.349995	0.998735	0.986834	LRP5L/LRP5/MEGF8	3
BP	GO:0006817	phosphate ion transport	3/1464	27/18866	0.349995	0.998735	0.986834	IP6K2/ATF4/CRY2	3
BP	GO:0006829	zinc ion transport	3/1464	27/18866	0.349995	0.998735	0.986834	SLC39A12/SLC39A10/SLC39A2	3
BP	GO:0018195	peptidyl-arginine modification	3/1464	27/18866	0.349995	0.998735	0.986834	PADI1/PADI4/PRDM14	3
BP	GO:0032786	positive regulation of DNA-templated transcription, elongation	3/1464	27/18866	0.349995	0.998735	0.986834	THOC1/CDK13/SUPT16H	3
BP	GO:0048668	collateral sprouting	3/1464	27/18866	0.349995	0.998735	0.986834	DVL1/ABL1/LPAR3	3
BP	GO:0050996	positive regulation of lipid catabolic process	3/1464	27/18866	0.349995	0.998735	0.986834	CPT1A/PNPLA2/PLIN5	3
BP	GO:0051953	negative regulation of amine transport	3/1464	27/18866	0.349995	0.998735	0.986834	P2RY1/SLC43A1/HRH3	3
BP	GO:0072207	metanephric epithelium development	3/1464	27/18866	0.349995	0.998735	0.986834	ACAT1/ADIPOQ/CXCR2	3
BP	GO:0099590	neurotransmitter receptor internalization	3/1464	27/18866	0.349995	0.998735	0.986834	SCRIB/NUMB/MX2	3
BP	GO:1905208	negative regulation of cardiocyte differentiation	3/1464	27/18866	0.349995	0.998735	0.986834	SOX6/PRICKLE1/DLL1	3
BP	GO:1903036	positive regulation of response to wounding	7/1464	74/18866	0.350501	0.998735	0.986834	CXCR4/HRG/NDEL1/F12/RREB1/OCLN/DUOX2	7
BP	GO:0008202	steroid metabolic process	28/1464	332/18866	0.350565	0.998735	0.986834	GBA2/OSBPL2/SHH/DGKQ/SULT1A2/HSD17B7/SULT1A1/CYP26A1/LGMN/ACADVL/ACAT1/LRP5/ATP8B1/SERPINA12/ACACB/OSBPL7/CYP2A6/CYP2C9/FAXDC2/CYP2C8/NFYC/SCAP/FASN/SF1/CACNA1H/CYP8B1/LMF1/NR5A1	28
BP	GO:0022618	ribonucleoprotein complex assembly	20/1464	233/18866	0.352265	0.998735	0.986834	SRSF6/SRSF5/RRS1/RBM5/CELF6/PWP2/AGO4/LUC7L3/RPS28/SETX/NOP2/RPL38/MDN1/PRPF3/SF1/LUC7L/ADAR/PRPF39/SRPK1/DHX9	20
BP	GO:0001558	regulation of cell growth	35/1464	420/18866	0.354371	0.998735	0.986834	GOLGA4/URI1/MAP2K5/CXCR4/IP6K2/RASGRP2/OGFR/INO80/HRG/TCHP/SMAD3/CAPRIN2/JADE1/SEMA3G/NDEL1/BRAT1/ZFYVE27/MEGF8/SERTAD3/ABL1/SGK2/CCDC85B/CD38/RASAL1/SUPV3L1/PSRC1/SEMA3B/NPPA/PML/STK11/BST2/FXN/BMP10/CXCL12/LPAR3	35
BP	GO:0042445	hormone metabolic process	19/1464	221/18866	0.354915	0.998735	0.986834	ADH1B/RBP4/SHH/DGKQ/HSD17B7/SULT1A1/CYP26A1/PNPLA2/ALDH1A2/SLC5A5/PCSK7/CYP2C9/CYP2C8/RETSAT/DUOX2/TSHB/CACNA1H/RDH13/NR5A1	19
BP	GO:0002695	negative regulation of leukocyte activation	16/1464	184/18866	0.354968	0.998735	0.986834	BCR/THOC1/VSIG4/MAD1L1/CLEC4G/SHH/SCRIB/FCGR2B/PARP3/IFNL1/RHBDD3/AXL/PTPN22/VTCN1/CD300A/PDE5A	16
BP	GO:0046939	nucleotide phosphorylation	12/1464	135/18866	0.355566	0.998735	0.986834	ADPGK/DHTKD1/FOXK1/OGT/PKLR/NCOR1/SLC4A1/POM121/OGDH/EP300/ENO3/SIRT6	12
BP	GO:0000478	endonucleolytic cleavage involved in rRNA processing	2/1464	16/18866	0.355787	0.998735	0.986834	NOL9/RRS1	2
BP	GO:0000479	endonucleolytic cleavage of tricistronic rRNA transcript (SSU-rRNA, 5.8S rRNA, LSU-rRNA)	2/1464	16/18866	0.355787	0.998735	0.986834	NOL9/RRS1	2
BP	GO:0002093	auditory receptor cell morphogenesis	2/1464	16/18866	0.355787	0.998735	0.986834	SCRIB/TRIOBP	2
BP	GO:0002295	T-helper cell lineage commitment	2/1464	16/18866	0.355787	0.998735	0.986834	SLAMF6/STAT6	2
BP	GO:0007076	mitotic chromosome condensation	2/1464	16/18866	0.355787	0.998735	0.986834	AKAP8L/AKAP8	2
BP	GO:0007288	sperm axoneme assembly	2/1464	16/18866	0.355787	0.998735	0.986834	TPGS1/BBS2	2
BP	GO:0010919	regulation of inositol phosphate biosynthetic process	2/1464	16/18866	0.355787	0.998735	0.986834	PTH1R/P2RY1	2
BP	GO:0032604	granulocyte macrophage colony-stimulating factor production	2/1464	16/18866	0.355787	0.998735	0.986834	LILRA2/IL17D	2
BP	GO:0033033	negative regulation of myeloid cell apoptotic process	2/1464	16/18866	0.355787	0.998735	0.986834	IRF7/CXCR2	2
BP	GO:0034116	positive regulation of heterotypic cell-cell adhesion	2/1464	16/18866	0.355787	0.998735	0.986834	FGB/FLOT1	2
BP	GO:0034380	high-density lipoprotein particle assembly	2/1464	16/18866	0.355787	0.998735	0.986834	ZDHHC8/PRKACA	2
BP	GO:0035864	response to potassium ion	2/1464	16/18866	0.355787	0.998735	0.986834	HSF1/CACNA1H	2
BP	GO:0043116	negative regulation of vascular permeability	2/1464	16/18866	0.355787	0.998735	0.986834	PDE2A/ANGPT1	2
BP	GO:0043508	negative regulation of JUN kinase activity	2/1464	16/18866	0.355787	0.998735	0.986834	NPPA/PTPN22	2
BP	GO:0045725	positive regulation of glycogen biosynthetic process	2/1464	16/18866	0.355787	0.998735	0.986834	PPP1R3E/SORBS1	2
BP	GO:0046134	pyrimidine nucleoside biosynthetic process	2/1464	16/18866	0.355787	0.998735	0.986834	UCKL1/DHODH	2
BP	GO:0046831	regulation of RNA export from nucleus	2/1464	16/18866	0.355787	0.998735	0.986834	AKAP8L/DHX9	2
BP	GO:0048012	hepatocyte growth factor receptor signaling pathway	2/1464	16/18866	0.355787	0.998735	0.986834	MST1/HGF	2
BP	GO:0048172	regulation of short-term neuronal synaptic plasticity	2/1464	16/18866	0.355787	0.998735	0.986834	SHISA9/SHISA6	2
BP	GO:0050710	negative regulation of cytokine secretion	2/1464	16/18866	0.355787	0.998735	0.986834	FCGR2B/CIDEA	2
BP	GO:0050774	negative regulation of dendrite morphogenesis	2/1464	16/18866	0.355787	0.998735	0.986834	UBE3A/GORASP1	2
BP	GO:0051014	actin filament severing	2/1464	16/18866	0.355787	0.998735	0.986834	AVIL/FLII	2
BP	GO:0061548	ganglion development	2/1464	16/18866	0.355787	0.998735	0.986834	FZD3/TULP3	2
BP	GO:0061684	chaperone-mediated autophagy	2/1464	16/18866	0.355787	0.998735	0.986834	ATP13A2/SNRNP70	2
BP	GO:0070593	dendrite self-avoidance	2/1464	16/18866	0.355787	0.998735	0.986834	IGSF9/EMB	2
BP	GO:0072224	metanephric glomerulus development	2/1464	16/18866	0.355787	0.998735	0.986834	ADIPOQ/RET	2
BP	GO:0080009	mRNA methylation	2/1464	16/18866	0.355787	0.998735	0.986834	METTL3/CMTR1	2
BP	GO:1903830	magnesium ion transmembrane transport	2/1464	16/18866	0.355787	0.998735	0.986834	ZDHHC17/NIPA2	2
BP	GO:1905874	regulation of postsynaptic density organization	2/1464	16/18866	0.355787	0.998735	0.986834	LRFN4/LRFN1	2
BP	GO:2001212	regulation of vasculogenesis	2/1464	16/18866	0.355787	0.998735	0.986834	HIF1AN/XDH	2
BP	GO:2001224	positive regulation of neuron migration	2/1464	16/18866	0.355787	0.998735	0.986834	DAB2IP/FBXO31	2
BP	GO:0015698	inorganic anion transport	15/1464	172/18866	0.3575	0.998735	0.986834	IP6K2/SLC12A9/NMUR2/SLC4A1/LRRC8E/BEST4/ATF4/SLC5A5/SLC12A4/ANO8/CA7/P2RY4/BEST1/CRY2/ANO2	15
BP	GO:0006270	DNA replication initiation	4/1464	39/18866	0.358792	0.998735	0.986834	WRNIP1/RPA4/TICRR/CCNE1	4
BP	GO:0006656	phosphatidylcholine biosynthetic process	4/1464	39/18866	0.358792	0.998735	0.986834	CHKA/CHKB/CSNK2B/PCYT1A	4
BP	GO:0007190	activation of adenylate cyclase activity	4/1464	39/18866	0.358792	0.998735	0.986834	ADORA3/GIPR/ADCY4/RAF1	4
BP	GO:0010737	protein kinase A signaling	4/1464	39/18866	0.358792	0.998735	0.986834	ADIPOQ/PRKAR1B/PRKACA/AKAP1	4
BP	GO:0016601	Rac protein signal transduction	4/1464	39/18866	0.358792	0.998735	0.986834	NISCH/STMN3/OGT/ARHGAP17	4
BP	GO:0046329	negative regulation of JNK cascade	4/1464	39/18866	0.358792	0.998735	0.986834	NCOR1/AMBP/NPPA/PTPN22	4
BP	GO:0002526	acute inflammatory response	10/1464	111/18866	0.359483	0.998735	0.986834	CD163/CCR7/DNASE1/EIF2AK1/FCGR2B/F12/RHBDD3/NPFF/MYLK3/CXCR2	10
BP	GO:0006821	chloride transport	10/1464	111/18866	0.359483	0.998735	0.986834	SLC12A9/NMUR2/SLC4A1/BEST4/SLC12A4/ANO8/CA7/P2RY4/BEST1/ANO2	10
BP	GO:0051149	positive regulation of muscle cell differentiation	10/1464	111/18866	0.359483	0.998735	0.986834	KAT2A/RBM4/SHH/MAPK12/ABL1/FLOT1/ARRB2/BMP10/MAML1/MYLK3	10
BP	GO:0060294	cilium movement involved in cell motility	10/1464	111/18866	0.359483	0.998735	0.986834	SLC9B2/TTC21A/PLTP/TPGS1/TTLL9/BBS2/SPEM1/NPHP4/CATSPER3/PRDM14	10
BP	GO:0098732	macromolecule deacylation	10/1464	111/18866	0.359483	0.998735	0.986834	CTBP1/SIN3B/NEK3/AKAP8L/EP300/AKAP8/HDAC5/MTA1/BAZ2A/SIRT6	10
BP	GO:0015837	amine transport	9/1464	99/18866	0.361169	0.998735	0.986834	SYT15/KCNB1/P2RY1/SLC43A1/GDNF/TH/ATP1A2/HRH3/CXCL12	9
BP	GO:0090277	positive regulation of peptide hormone secretion	9/1464	99/18866	0.361169	0.998735	0.986834	ITSN1/RBP4/GIPR/FGB/CAPN10/CD38/PLA2G6/NADK/RASL10B	9
BP	GO:0032873	negative regulation of stress-activated MAPK cascade	5/1464	51/18866	0.362397	0.998735	0.986834	NCOR1/AMBP/NPPA/PTPN22/MYC	5
BP	GO:0038084	vascular endothelial growth factor signaling pathway	5/1464	51/18866	0.362397	0.998735	0.986834	HRG/PGF/DAB2IP/DLL1/XDH	5
BP	GO:0046460	neutral lipid biosynthetic process	5/1464	51/18866	0.362397	0.998735	0.986834	THRSP/AVIL/PNPLA2/PLIN5/PLA2G15	5
BP	GO:0046463	acylglycerol biosynthetic process	5/1464	51/18866	0.362397	0.998735	0.986834	THRSP/AVIL/PNPLA2/PLIN5/PLA2G15	5
BP	GO:0048146	positive regulation of fibroblast proliferation	5/1464	51/18866	0.362397	0.998735	0.986834	CTC1/PML/MYC/SIRT6/DHX9	5
BP	GO:0070303	negative regulation of stress-activated protein kinase signaling cascade	5/1464	51/18866	0.362397	0.998735	0.986834	NCOR1/AMBP/NPPA/PTPN22/MYC	5
BP	GO:0071827	plasma lipoprotein particle organization	5/1464	51/18866	0.362397	0.998735	0.986834	PLTP/ZDHHC8/MPO/PRKACA/GPIHBP1	5
BP	GO:0006368	transcription elongation from RNA polymerase II promoter	8/1464	87/18866	0.362547	0.998735	0.986834	RTF1/CDK13/SHH/MLLT1/NELFCD/ERCC3/CDK9/SUPT16H	8
BP	GO:0055072	iron ion homeostasis	8/1464	87/18866	0.362547	0.998735	0.986834	SLC40A1/EIF2AK1/ATP13A2/SLC46A1/SLC25A37/FXN/ALAS2/MYC	8
BP	GO:0071901	negative regulation of protein serine/threonine kinase activity	13/1464	148/18866	0.362592	0.998735	0.986834	CDK5RAP3/STK38/LRP5/CDK5RAP1/CDKN1C/ADIPOQ/TESK1/ABL1/DAB2IP/PRKAR1B/NPPA/PTPN22/CD300A	13
BP	GO:0007059	chromosome segregation	28/1464	334/18866	0.362689	0.998735	0.986834	MAU2/SUN1/WRAP73/CDC16/MAD1L1/MSTO1/RRS1/REC8/INO80/EME2/POGZ/BAG6/NDEL1/NEK8/NUMA1/AGO4/DDX11/SYCP2/MMS19/AKAP8L/PSRC1/AKAP8/CCNE1/RPS3/HORMAD2/CORT/SRPK1/KNSTRN	28
BP	GO:0008344	adult locomotory behavior	7/1464	75/18866	0.363446	0.998735	0.986834	TSC1/GIGYF2/GDNF/ARRB2/ATP1A2/FXN/CXCL12	7
BP	GO:0035019	somatic stem cell population maintenance	7/1464	75/18866	0.363446	0.998735	0.986834	TAF6L/LRP5/PRDM14/ZFP36L2/MYC/RAF1/VPS72	7
BP	GO:0050805	negative regulation of synaptic transmission	7/1464	75/18866	0.363446	0.998735	0.986834	KCNB1/PPP1R9A/ASIC1/ADIPOQ/CD38/PLA2G6/PICK1	7
BP	GO:0032613	interleukin-10 production	6/1464	63/18866	0.363576	0.998735	0.986834	HGF/FCGR2B/TRIB2/MMP8/ISG15/DLL1	6
BP	GO:0098813	nuclear chromosome segregation	23/1464	272/18866	0.364719	0.998735	0.986834	MAU2/SUN1/WRAP73/CDC16/MAD1L1/MSTO1/RRS1/REC8/INO80/EME2/POGZ/BAG6/NUMA1/AGO4/DDX11/SYCP2/AKAP8L/PSRC1/AKAP8/CCNE1/HORMAD2/CORT/KNSTRN	23
BP	GO:0006937	regulation of muscle contraction	15/1464	173/18866	0.365972	0.998735	0.986834	GSTM2/NOS1/HSPB6/KCNJ2/TNNI3/NMUR2/P2RX1/ATP1A2/NPPA/PRKACA/BMP10/KCNA1/DMPK/PDE5A/PPP1R12B	15
BP	GO:0009152	purine ribonucleotide biosynthetic process	15/1464	173/18866	0.365972	0.998735	0.986834	PDK4/ACSS1/PKLR/ACAT1/PDPR/DCAKD/PANK4/ACACB/NPPA/FASN/ACSBG2/ADCY4/PDK2/ATP6/TECR	15
BP	GO:0045444	fat cell differentiation	20/1464	235/18866	0.366767	0.998735	0.986834	CTBP1/WNT10B/SMAD3/LRP5/C1QTNF3/RREB1/ADIPOQ/TRIB2/BBS2/RETN/FABP4/CCDC85B/ARID5B/TMEM120B/ATAT1/LGALS12/EP300/ZFP36L2/STK4/SDF4	20
BP	GO:0002698	negative regulation of immune effector process	11/1464	124/18866	0.367634	0.998735	0.986834	BCR/THOC1/VSIG4/CLEC4G/SEC14L1/FCGR2B/PARP3/IFNL1/ARRB2/BST2/CD300A	11
BP	GO:0006721	terpenoid metabolic process	11/1464	124/18866	0.367634	0.998735	0.986834	ADH1B/RBP4/CYP26A1/GPC3/PNPLA2/ALDH1A2/CYP2C9/CYP2C8/RETSAT/RDH13/GPIHBP1	11
BP	GO:0051208	sequestering of calcium ion	11/1464	124/18866	0.367634	0.998735	0.986834	SLC25A23/CCR7/GSTM2/NOS1/ATP7B/MCOLN1/TPCN1/ABL1/ATP1A2/PRKACA/CAPN3	11
BP	GO:0000070	mitotic sister chromatid segregation	14/1464	161/18866	0.36885	0.998735	0.986834	MAU2/WRAP73/CDC16/MAD1L1/MSTO1/RRS1/REC8/INO80/POGZ/NUMA1/AKAP8L/PSRC1/AKAP8/KNSTRN	14
BP	GO:0016485	protein processing	19/1464	223/18866	0.369841	0.998735	0.986834	APH1B/IFI16/SHH/LGMN/FGB/OGT/NCSTN/F12/CD5L/PCSK7/HM13/CIDEB/CPN1/PRKACA/TSHB/APH1A/FXN/PIDD1/RCE1	19
BP	GO:0006275	regulation of DNA replication	10/1464	112/18866	0.370078	0.998735	0.986834	BRPF3/INO80/CTC1/WRNIP1/EHMT2/CHTF18/GLI1/TICRR/RBBP6/DHX9	10
BP	GO:0000469	cleavage involved in rRNA processing	3/1464	28/18866	0.371782	0.998735	0.986834	NOL9/RRS1/EXOSC7	3
BP	GO:0000470	maturation of LSU-rRNA	3/1464	28/18866	0.371782	0.998735	0.986834	NOL9/RPL7L1/NOP2	3
BP	GO:0002360	T cell lineage commitment	3/1464	28/18866	0.371782	0.998735	0.986834	SHH/SLAMF6/STAT6	3
BP	GO:0006760	folic acid-containing compound metabolic process	3/1464	28/18866	0.371782	0.998735	0.986834	FOLR2/SLC46A1/FOLR1	3
BP	GO:0006972	hyperosmotic response	3/1464	28/18866	0.371782	0.998735	0.986834	RCSD1/SLC25A23/EFHD1	3
BP	GO:0018146	keratan sulfate biosynthetic process	3/1464	28/18866	0.371782	0.998735	0.986834	B4GALT3/ST3GAL3/B4GALT2	3
BP	GO:0021680	cerebellar Purkinje cell layer development	3/1464	28/18866	0.371782	0.998735	0.986834	RERE/B4GALT2/DLL1	3
BP	GO:0021846	cell proliferation in forebrain	3/1464	28/18866	0.371782	0.998735	0.986834	DCT/NUMB/SIX3	3
BP	GO:0031167	rRNA methylation	3/1464	28/18866	0.371782	0.998735	0.986834	NSUN5P1/NSUN5/NOP2	3
BP	GO:0031440	regulation of mRNA 3'-end processing	3/1464	28/18866	0.371782	0.998735	0.986834	HSF1/PAPOLA/CDK9	3
BP	GO:0033598	mammary gland epithelial cell proliferation	3/1464	28/18866	0.371782	0.998735	0.986834	MST1/RREB1/STAT6	3
BP	GO:0051647	nucleus localization	3/1464	28/18866	0.371782	0.998735	0.986834	SUN1/SYNE2/PABPC1L	3
BP	GO:0072376	protein activation cascade	3/1464	28/18866	0.371782	0.998735	0.986834	FGB/F12/KNG1	3
BP	GO:0072378	blood coagulation, fibrin clot formation	3/1464	28/18866	0.371782	0.998735	0.986834	FGB/F12/KNG1	3
BP	GO:1902668	negative regulation of axon guidance	3/1464	28/18866	0.371782	0.998735	0.986834	SEMA3G/PTPRO/SEMA3B	3
BP	GO:1902932	positive regulation of alcohol biosynthetic process	3/1464	28/18866	0.371782	0.998735	0.986834	PTH1R/P2RY1/SCAP	3
BP	GO:1903579	negative regulation of ATP metabolic process	3/1464	28/18866	0.371782	0.998735	0.986834	NCOR1/SLC4A1/SIRT6	3
BP	GO:1990776	response to angiotensin	3/1464	28/18866	0.371782	0.998735	0.986834	ARID1B/HSF1/ROCK2	3
BP	GO:0009914	hormone transport	27/1464	323/18866	0.371876	0.998735	0.986834	SLC7A8/ITSN1/CPT1A/RAB11FIP3/SLC9B2/RBP4/KCNB1/CAMK2G/GIPR/FGB/LRP5L/LRP5/C1QTNF3/P2RY1/ADIPOQ/CAPN10/RETN/CD38/PLA2G6/PICK1/SLC25A6/NPPA/STXBP5L/NADK/NPFF/RAF1/RASL10B	27
BP	GO:0030219	megakaryocyte differentiation	9/1464	100/18866	0.372415	0.998735	0.986834	L3MBTL1/TNRC6A/AGO4/FAXDC2/KMT2D/EP300/MTURN/KMT2B/KMT2A	9
BP	GO:0031396	regulation of protein ubiquitination	18/1464	211/18866	0.372995	0.998735	0.986834	UBE3A/CDK5RAP3/GORASP1/OGT/PRICKLE1/ABL1/U2AF2/ARRB2/ISG15/PARP10/TICAM1/DAXX/PTPN22/RPS3/ANGPT1/CDK9/UBR5/MTA1	18
BP	GO:0007033	vacuole organization	15/1464	174/18866	0.374474	0.998735	0.986834	TBC1D14/MFSD8/ATG16L2/HPS4/PACS2/ATP13A2/STX17/HOOK2/RALB/ATG14/FAM160A2/SEC22B/ATG2A/ENO3/ATG16L1	15
BP	GO:0060193	positive regulation of lipase activity	7/1464	76/18866	0.376426	0.998735	0.986834	NMUR2/PLIN5/S1PR4/RASGRP4/PLCB2/GPIHBP1/LMF1	7
BP	GO:0002209	behavioral defense response	4/1464	40/18866	0.376901	0.998735	0.986834	FBXL20/ASIC1/ATP1A2/EP300	4
BP	GO:0009072	aromatic amino acid family metabolic process	4/1464	40/18866	0.376901	0.998735	0.986834	DCT/CARNS1/TH/ACMSD	4
BP	GO:0010613	positive regulation of cardiac muscle hypertrophy	4/1464	40/18866	0.376901	0.998735	0.986834	BMP10/CDK9/ROCK2/PDE5A	4
BP	GO:0010664	negative regulation of striated muscle cell apoptotic process	4/1464	40/18866	0.376901	0.998735	0.986834	HSPB6/HSF1/RGL2/PPP1R10	4
BP	GO:0034142	toll-like receptor 4 signaling pathway	4/1464	40/18866	0.376901	0.998735	0.986834	LILRA2/DAB2IP/TIRAP/PTPN22	4
BP	GO:0042307	positive regulation of protein import into nucleus	4/1464	40/18866	0.376901	0.998735	0.986834	SHH/SMAD3/UBR5/MAVS	4
BP	GO:0048713	regulation of oligodendrocyte differentiation	4/1464	40/18866	0.376901	0.998735	0.986834	CXCR4/DAAM2/SHH/TP73	4
BP	GO:0019827	stem cell population maintenance	14/1464	162/18866	0.377685	0.998735	0.986834	KAT2A/TAF6L/RTF1/LRP5/PADI4/DLL1/PRDM14/ZFP36L2/METTL3/SETD6/SRRT/MYC/RAF1/VPS72	14
BP	GO:0048593	camera-type eye morphogenesis	11/1464	125/18866	0.37771	0.998735	0.986834	RBP4/RING1/LRP5/ATF4/TH/DLL1/RPGRIP1/RDH13/CABP4/SIX3/GDF11	11
BP	GO:0032507	maintenance of protein location in cell	6/1464	64/18866	0.377769	0.998735	0.986834	SUN1/VPS13C/SUPT7L/TAPT1/PML/NR5A1	6
BP	GO:0046794	transport of virus	6/1464	64/18866	0.377769	0.998735	0.986834	SIGLEC1/CD209/CLEC4M/POM121/MVB12B/BST2	6
BP	GO:0050909	sensory perception of taste	6/1464	64/18866	0.377769	0.998735	0.986834	WNT10B/ASIC1/TAS2R10/TAS1R1/TAS2R14/PLCB2	6
BP	GO:0006301	postreplication repair	5/1464	52/18866	0.378205	0.998735	0.986834	TRIM25/POLDIP2/ISG15/PARP10/POLI	5
BP	GO:0010883	regulation of lipid storage	5/1464	52/18866	0.378205	0.998735	0.986834	ACACB/PNPLA2/PLIN5/FITM1/CIDEA	5
BP	GO:0046580	negative regulation of Ras protein signal transduction	5/1464	52/18866	0.378205	0.998735	0.986834	STMN3/LZTR1/DAB2IP/RASAL1/MYOC	5
BP	GO:0045927	positive regulation of growth	23/1464	274/18866	0.378273	0.998735	0.986834	GOLGA4/MAP2K5/CXCR4/PPM1F/INO80/NDEL1/BRAT1/ZFYVE27/HSF1/ACACB/MEGF8/GH2/BBS2/CD38/RASAL1/SUPV3L1/GLI1/DLL1/FXN/BMP10/CXCL12/CAPN3/LPAR3	23
BP	GO:0006310	DNA recombination	25/1464	299/18866	0.378299	0.998735	0.986834	THOC1/C11orf80/RAD52/ACTR5/UBR2/REC8/INO80/RAD51D/EME2/RPA4/EXOSC6/FAN1/PARP3/POLM/DCLRE1C/SPIDR/SETX/MMS19/SUPV3L1/RECQL4/FUS/CORT/STAT6/PIF1/SIRT6	25
BP	GO:0008217	regulation of blood pressure	16/1464	187/18866	0.37957	0.998735	0.986834	NISCH/HBB/NOX1/SMAD3/NOS1/LRP5/TNNI3/ADIPOQ/PTPRO/P2RX1/ATP1A2/NPPA/DLL1/BRS3/NPFF/RASL10B	16
BP	GO:0045333	cellular respiration	16/1464	187/18866	0.37957	0.998735	0.986834	SLC25A23/COQ10A/ND2/DHTKD1/COQ9/UQCR10/ME2/TRAP1/ND4/NDUFA10/OGDH/NDUFS2/NDUFAF1/COX1/FXN/MYBBP1A	16
BP	GO:0051701	interaction with host	18/1464	212/18866	0.380728	0.998735	0.986834	SIGLEC1/CD209/THOC1/CXCR4/TRIM27/CLEC4G/TRIM22/MRC1/SCRIB/PABPN1/TRIM25/CLEC4M/THOC6/PML/KPNA5/AXL/CLDN6/EIF2AK2	18
BP	GO:0030111	regulation of Wnt signaling pathway	31/1464	375/18866	0.38314	0.998735	0.986834	TERT/DVL1/DAAM2/WNK2/SHH/WNT10B/SMAD3/LZTS2/PRICKLE1/CAPRIN2/GPC3/JADE1/JRK/PTPRO/CCDC88C/CSNK1G2/NPHP3/ABL1/DAB2IP/NPHP4/RNF146/GLI1/TLE2/STK4/STK11/FOLR1/LRP4/UBR5/LYPD6/SIX3/SHISA6	31
BP	GO:0030705	cytoskeleton-dependent intracellular transport	17/1464	200/18866	0.384218	0.998735	0.986834	SUN1/MYO19/TRAK1/SYNE2/WDR19/TTC21A/MYO5C/RHOT2/MYO1G/NDEL1/KIF5A/CCDC88C/HOOK2/IFT140/STK11/MYO7B/AP3D1	17
BP	GO:0000076	DNA replication checkpoint	2/1464	17/18866	0.384485	0.998735	0.986834	RAD9A/TICRR	2
BP	GO:0002566	somatic diversification of immune receptors via somatic mutation	2/1464	17/18866	0.384485	0.998735	0.986834	POLM/ADAR	2
BP	GO:0006474	N-terminal protein amino acid acetylation	2/1464	17/18866	0.384485	0.998735	0.986834	NAA40/EP300	2
BP	GO:0006957	complement activation, alternative pathway	2/1464	17/18866	0.384485	0.998735	0.986834	VSIG4/C7	2
BP	GO:0007250	activation of NF-kappaB-inducing kinase activity	2/1464	17/18866	0.384485	0.998735	0.986834	TIRAP/ZFP91	2
BP	GO:0009299	mRNA transcription	2/1464	17/18866	0.384485	0.998735	0.986834	HSF1/ATF4	2
BP	GO:0016045	detection of bacterium	2/1464	17/18866	0.384485	0.998735	0.986834	SSC5D/NOD1	2
BP	GO:0016074	snoRNA metabolic process	2/1464	17/18866	0.384485	0.998735	0.986834	EXOSC6/NOLC1	2
BP	GO:0030540	female genitalia development	2/1464	17/18866	0.384485	0.998735	0.986834	RBP4/AXL	2
BP	GO:0030575	nuclear body organization	2/1464	17/18866	0.384485	0.998735	0.986834	PML/SF1	2
BP	GO:0030889	negative regulation of B cell proliferation	2/1464	17/18866	0.384485	0.998735	0.986834	FCGR2B/CD300A	2
BP	GO:0033599	regulation of mammary gland epithelial cell proliferation	2/1464	17/18866	0.384485	0.998735	0.986834	MST1/RREB1	2
BP	GO:0033631	cell-cell adhesion mediated by integrin	2/1464	17/18866	0.384485	0.998735	0.986834	ITGA4/PIEZO1	2
BP	GO:0035729	cellular response to hepatocyte growth factor stimulus	2/1464	17/18866	0.384485	0.998735	0.986834	LGMN/HGF	2
BP	GO:0038092	nodal signaling pathway	2/1464	17/18866	0.384485	0.998735	0.986834	SHH/SMAD3	2
BP	GO:0042249	establishment of planar polarity of embryonic epithelium	2/1464	17/18866	0.384485	0.998735	0.986834	DVL1/NPHP3	2
BP	GO:0044764	multi-organism cellular process	2/1464	17/18866	0.384485	0.998735	0.986834	SIGLEC1/CXCR4	2
BP	GO:0045722	positive regulation of gluconeogenesis	2/1464	17/18866	0.384485	0.998735	0.986834	KAT2A/ARPP19	2
BP	GO:0050665	hydrogen peroxide biosynthetic process	2/1464	17/18866	0.384485	0.998735	0.986834	MPV17L/DUOX2	2
BP	GO:0055070	copper ion homeostasis	2/1464	17/18866	0.384485	0.998735	0.986834	COX19/ATP7B	2
BP	GO:0070242	thymocyte apoptotic process	2/1464	17/18866	0.384485	0.998735	0.986834	DFFA/PTCRA	2
BP	GO:0070293	renal absorption	2/1464	17/18866	0.384485	0.998735	0.986834	HBB/ADIPOQ	2
BP	GO:0070525	tRNA threonylcarbamoyladenosine metabolic process	2/1464	17/18866	0.384485	0.998735	0.986834	CTAG2/CDK5RAP1	2
[truncated: 5,254 more rows]
